# Supplementary material for: Patients’ Perceptions of Care Integration in Multiple Sclerosis Care in Finland: A Cross- Sectional National Survey
Source: Research Square preprint supplement (doi:10.21203/rs.3.rs-7364638/v1), 2025-09-23
Supplement: Supplementary file 1 [file 4927399faefb8d9f5e37b990.xlsx]

## Sheet: KAIKKI
																												Ennen viimeisintä MS-tautiin liittyvää vastaanottoani (esim. neurologi, hoitaja, lääketiputus), sain muistutuksen vastaanoton ajankohdasta (esim. tekstiviestillä tai sähköpostilla).	Ennen viimeisintä MS-tautiin liittyvää vastaanottoani (esim. neurologi, hoitaja, lääketiputus), sain ohjeet siitä miten valmistautua ja/tai mitä voin odottaa vastaanotolta.	Edellisen vuoden aikana, lääkärini tai muu hoitohenkilökunta on ottanut minuun yhteyttä	Tiedän miten ja mistä saisin luotettavia vastauksia hoitooni liittyen	Edellisen vuoden aikana, olen lähtenyt lääkärin vastaanotolta hämmentyneenä siitä, mitä tehdä seuraavaksi terveydentilani hoitamiseksi	Edellisen vuoden aikana, elämässäni on ollut asioita, jotka ovat vaikeuttaneet omasta terveydestäni huolehtimista	Edellisen vuoden aikana, olen laatinut lääkärini tai muun hoitohenkilökunnan kanssa suunnitelman, joka auttaa minua selviytymään asioista, jotka vaikeuttavat omasta terveydestäni huolehtimista	Vastaa seuraaviin väittämiin MS-taudin hoitoon liittyvien kokemuksiesi perusteella EDELLISEN VUODEN ajalta. Mikäli kysymys ei ole olennainen (esim. et ole jättänyt saapumatta vastaanotolle), vastaa 'En osaa sanoa'.
Ikä	Sukupuoli	Koulutusaste	Ruokakunnan koko	Ruokakunnassa asuvien alaikäisten (alle 18 vuotiaiden) määrä	Työllisyystilanne	Äidinkieli	Diagnoosivuosi (MS-tauti)	Hyvinvointialue	Minulla on myös yksi tai useampi muu diagnoosi, jonka takia käyn säännöllisesti lääkärissä	Missä sijaitsee ensisijainen hoitovastuu MS-taudistasi? (Esim. pääasiallinen hoitohenkilösi)	Edellisen vuoden aikana, mitkä seuraavista kuvaavat MS-tautisi tilannetta parhaiten (valitse kaikki sopivat)?					Edellisen vuoden aikana, kuinka monta kertaa olet MS-taudin vuoksi käynyt terveydenhuollon ammattilaisen vastaanotolla (esim. lääkärin, hoitajan, fysioterapeutin, tai puheterapeutin vastaanotolla)?		Edellisen vuoden aikana, kuinka monta kertaa olet MUUTEN KUIN MS-taudin vuoksi käynyt terveydenhuollon ammattilaisen vastaanotolla (esim. lääkärin, hoitajan, fysioterapeutin, tai puheterapeutin vastaanotolla)?		Edellisen vuoden aikana, kuinka monta eri terveydenhuollon ammattilaista (esim. lääkäri, hoitaja, fysioterapeutti, puheterapeutti) on hoitanut sinua kyseisillä vastaanotoilla (MS-tautiin liittyvät)?	Edellisen vuoden aikana, kuinka monta eri terveydenhuollon ammattilaista (esim. lääkäri, hoitaja, fysioterapeutti, puheterapeutti) on hoitanut sinua kyseisillä vastaanotoilla (Muut kuin MS-tautiin liittyvät)?	Edellisen vuoden aikana, kuinka monta päivää olet ollut MS-tautiin liittyen osastohoidossa?	Edellisen vuoden aikana, oletko käynyt kuntoutuksessa?	Miten yleisesti arvioisit omaa terveydentilaasi?	Miten yleisesti arvioisit saamaasi hoitoa?	Edellisen vuoden aikana, tiesikö jokin palveluntarjoaja kaikista terveydenhuoltoon liittyvistä tarpeistasi?	Edellisen vuoden aikana, tiesikö jokin palveluntarjoaja kaikista käyttämistäsi lääkkeistä?	Ennen viimeisintä MS-tautiin liittyvää vastaanottoani (esim. neurologi, hoitaja, lääketiputus), sain muistutuksen vastaanoton ajankohdasta (esim. tekstiviestillä tai sähköpostilla).	Ennen viimeisintä MS-tautiin liittyvää vastaanottoani (esim. neurologi, hoitaja, lääketiputus), sain ohjeet siitä miten valmistautua ja/tai mitä voin odottaa vastaanotolta.	Edellisen vuoden aikana, lääkärini tai muu hoitohenkilökunta on ottanut minuun yhteyttä	Tiedän miten ja mistä saisin luotettavia vastauksia hoitooni liittyen	Edellisen vuoden aikana, olen lähtenyt lääkärin vastaanotolta hämmentyneenä siitä, mitä tehdä seuraavaksi terveydentilani hoitamiseksi	Edellisen vuoden aikana, elämässäni on ollut asioita, jotka ovat vaikeuttaneet omasta terveydestäni huolehtimista	Edellisen vuoden aikana, olen laatinut lääkärini tai muun hoitohenkilökunnan kanssa suunnitelman, joka auttaa minua selviytymään asioista, jotka vaikeuttavat omasta terveydestäni huolehtimista	Palveluntarjoaja perui tai siirsi vastaanottoni aikaa	Syystä tai toisesta jätin itse saapumatta vastaanotolle	Jos jätin saapumatta vastaanotolle, minuun oltiin yhteydessä uuden ajan varaamista varten	Olen joutunut vastaanotolla toistamaan asioita, joita olen jo kertonut aikaisemmin	Lääkärini on tiennyt keskeisimmät asiat hoitohistoriastani	Lääkärini tai muu hoitohenkilökunta on kysynyt minulta terveyteeni vaikuttavista, työ- ja yksityiselämääni liittyvistä asioista	Lääkärini on selittänyt asiat helposti ymmärrettävällä tavalla	Lääkärini on kuunnellut minua	Lääkärini on kunnioittanut sitä, mitä minulla on ollut sanottavana	Vastaanotolle on varattu riittävästi aikaa	Lääkärini on kysynyt, onko minulla ehdotuksia oman terveyteni parantamiseksi	Lääkärini on ymmärtänyt mitkä asiat ovat minulle tärkeitä hoidossani	Lääkärini on keskustellut kanssani terveyteeni liittyvistä tavoitteistani	Hoito, jota olen saanut on auttanut minua saavuttamaan terveyteeni liittyviä tavoitteitani	Lääkärini tai muu hoitohenkilökunta on kysynyt tarvitsenko tukea kotona terveydentilani hoitamisessa
35-44	Nainen	Alempi korkeakoulututkinto	5 tai enemmän	3	Eläkkeellä (ml. työkyvyttömyyseläke)	Suomi	2021	Pohjois-Pohjanmaa	Ei	Erikoissairaanhoidossa (esim. sairaalan neurologian poliklinikka)			MS-tauti hoitotasapainossa, arjen toimintakyky alentunut			52	0	0	0	3	0	En ollenkaan	Alle 7 päivää	Tyydyttävä	Hyvä	En osaa sanoa	En osaa sanoa	Kyllä	Ei	Ei	Kyllä	Kyllä	Ei	Ei	Ei koskaan	Ei koskaan	Ei koskaan	Joskus	Aina	Joskus	Aina	Aina	Aina	Usein	Ei koskaan	Usein	Usein	Usein	Joskus
45-54	Nainen	Opistoasteen tutkinto	3	1	Osa-aikainen	Suomi	2020	Keski-Suomi	Ei	Erikoissairaanhoidossa (esim. sairaalan neurologian poliklinikka)			MS-tauti hoitotasapainossa, arjen toimintakyky alentunut			7	2	2	3	8	6	En ollenkaan	En ollenkaan	Tyydyttävä	Hyvä	Ei	Ei	Kyllä	Ei	Ei	Kyllä	Ei	Ei	Ei	Ei koskaan	Ei koskaan	En osaa sanoa	Joskus	Usein	Usein	Aina	Usein	Usein	Aina	Harvoin	Usein	Ei koskaan	Joskus	Ei koskaan
18-24	Nainen	Toinen aste (Lukio tai ammattikoulu)	3	1	Täysipäiväinen	Suomi	2020	Keski-Suomi	Ei	Erikoissairaanhoidossa (esim. sairaalan neurologian poliklinikka)		MS-tauti hoitotasapainossa, ei juuri toimintakykyhaittaa				2	0	0	0	3	0	En ollenkaan	En ollenkaan	Erinomainen	Hyvä	En osaa sanoa	En osaa sanoa	Ei	Ei	Kyllä	Kyllä	Ei	Ei	Kyllä	Ei koskaan	Ei koskaan	En osaa sanoa	Usein	Aina	Harvoin	Joskus	Usein	Aina	Aina	Ei koskaan	En osaa sanoa	Joskus	En osaa sanoa	Ei koskaan
35-44	Nainen	Toinen aste (Lukio tai ammattikoulu)	5 tai enemmän	3	Osa-aikainen	Suomi	2016	Helsinki (ja HUS)	Ei	Erikoissairaanhoidossa (esim. sairaalan neurologian poliklinikka)			MS-tauti hoitotasapainossa, arjen toimintakyky alentunut			30	0	2	0	3	2	En ollenkaan	En ollenkaan	Tyydyttävä	Hyvä	Kyllä, suurinpiirtein	Kyllä, suurinpiirtein	Kyllä	Kyllä	Ei	Kyllä	Ei	Kyllä	Kyllä	Ei koskaan	Ei koskaan	En osaa sanoa	Harvoin	Usein	Joskus	Usein	Usein	Usein	Joskus	Harvoin	Usein	Joskus	Harvoin	Harvoin
45-54	Nainen	Peruskoulu	5 tai enemmän	3	Täysipäiväinen	Suomi	2016	Varsinais-Suomi	Ei	En osaa sanoa		MS-tauti hoitotasapainossa, ei juuri toimintakykyhaittaa				2	1	2	0	1	1	En ollenkaan	En ollenkaan	Tyydyttävä	Kohtalainen	En osaa sanoa	En osaa sanoa	Kyllä	Kyllä	Ei	Kyllä	Ei	Kyllä	Ei	Ei koskaan	Ei koskaan	En osaa sanoa	Ei koskaan	Usein	Joskus	Usein	Usein	Usein	Usein	Ei koskaan	Usein	Joskus	En osaa sanoa	Ei koskaan
55-64	Nainen	Toinen aste (Lukio tai ammattikoulu)	2	0	Täysipäiväinen	Suomi	2006	Etelä-Pohjanmaa	Kyllä	Erikoissairaanhoidossa (esim. sairaalan neurologian poliklinikka)		MS-tauti hoitotasapainossa, ei juuri toimintakykyhaittaa				12	0	3	3	4-5, en osaa sanoa, hoitajat vaihtuu	3	En ollenkaan	En ollenkaan	Hyvä	Erinomainen	Kyllä, suurinpiirtein	Kyllä, suurinpiirtein	Kyllä	Ei	Ei	Kyllä	Ei	Ei	Ei	Ei koskaan	Ei koskaan	En osaa sanoa	Harvoin	Aina	Joskus	Aina	Aina	Aina	Aina	Joskus	Usein	Joskus	Aina	Ei koskaan
45-54	Nainen	En halua sanoa	2	0	Eläkkeellä (ml. työkyvyttömyyseläke)	Suomi	2006	Etelä-Karjala	Kyllä	Erikoissairaanhoidossa (esim. sairaalan neurologian poliklinikka)			MS-tauti hoitotasapainossa, arjen toimintakyky alentunut			1	0	3	3	3	4	En ollenkaan	Yli 7 päivää	Kohtalainen	Huono	Ei	Ei	Ei	Ei	Ei	Ei	Kyllä	Ei	Ei	Ei koskaan	Ei koskaan	En osaa sanoa	Aina	Joskus	Harvoin	Usein	Harvoin	Harvoin	Ei koskaan	Ei koskaan	Harvoin	Harvoin	Joskus	Ei koskaan
35-44	Nainen	Ylempi korkeakoulututkinto	2	0	Täysipäiväinen	Suomi	2007	Helsinki (ja HUS)	Kyllä	Erikoissairaanhoidossa (esim. sairaalan neurologian poliklinikka)		MS-tauti hoitotasapainossa, ei juuri toimintakykyhaittaa				1	1	20	15	1	30	En ollenkaan	En ollenkaan	Hyvä	Hyvä	Kyllä, suurinpiirtein	Kyllä, suurinpiirtein	Kyllä	Kyllä	Kyllä	Kyllä	Ei	Ei	Ei	Ei koskaan	Ei koskaan	En osaa sanoa	Joskus	Usein	Aina	Usein	Usein	Usein	Usein	Joskus	Joskus	Joskus	Usein	Harvoin
35-44	Nainen	Alempi korkeakoulututkinto	4	2	Eläkkeellä (ml. työkyvyttömyyseläke)	Suomi	2023	Lappi	Kyllä	Erikoissairaanhoidossa (esim. sairaalan neurologian poliklinikka)	Uusi MS-tauti diagnoosi			MS-tauti ei hoitotasapainossa (esim. pahenemisvaihe)		14	2	14	2	3	3	Alle 7 päivää	Alle 7 päivää	Kohtalainen	Tyydyttävä	Kyllä, suurinpiirtein	Kyllä, suurinpiirtein	Kyllä	Kyllä	Kyllä	Ei	Kyllä	Kyllä	Ei	Ei koskaan	Ei koskaan	En osaa sanoa	Usein	Usein	Usein	Usein	Usein	Usein	Joskus	Harvoin	Usein	Joskus	Harvoin	Harvoin
45-54	Nainen	Tutkijakoulutus	2	0	Täysipäiväinen	Suomi	2009	Varsinais-Suomi	Ei	Erikoissairaanhoidossa (esim. sairaalan neurologian poliklinikka)		MS-tauti hoitotasapainossa, ei juuri toimintakykyhaittaa				3	2	6	2	4	10	En ollenkaan	En ollenkaan	Hyvä	Hyvä	Kyllä, suurinpiirtein	Kyllä, suurinpiirtein	Kyllä	Kyllä	Kyllä	Kyllä	Ei	Kyllä	Kyllä	Ei koskaan	En osaa sanoa	En osaa sanoa	Joskus	Usein	Aina	Aina	Aina	Aina	Aina	Joskus	Joskus	Joskus	Aina	Joskus
35-44	Mies	Toinen aste (Lukio tai ammattikoulu)	3	1	Täysipäiväinen	Suomi	2020	Varsinais-Suomi	Ei	En osaa sanoa		MS-tauti hoitotasapainossa, ei juuri toimintakykyhaittaa				2	2	2	1	Eos	1	En ollenkaan	En ollenkaan	Erinomainen	Tyydyttävä	Ei	Kyllä, varmasti	Kyllä	Ei	Kyllä	Kyllä	Kyllä	Ei	Ei	Harvoin	Ei koskaan	En osaa sanoa	Ei koskaan	Joskus	Joskus	Usein	Usein	Usein	Joskus	Harvoin	En osaa sanoa	Joskus	En osaa sanoa	Ei koskaan
35-44	Nainen	Ylempi korkeakoulututkinto	3	1	Täysipäiväinen	Suomi	2012	Kymenlaakso	Ei	Erikoissairaanhoidossa (esim. sairaalan neurologian poliklinikka)			MS-tauti hoitotasapainossa, arjen toimintakyky alentunut			100	5	5	2	5	2	En ollenkaan	En ollenkaan	Hyvä	Hyvä	Kyllä, suurinpiirtein	Kyllä, suurinpiirtein	En osaa sanoa	Ei	Kyllä	Kyllä	Kyllä	Kyllä	Ei	Harvoin	Ei koskaan	Ei koskaan	Joskus	Aina	Aina	Aina	Aina	Aina	Aina	Usein	Aina	Usein	Aina	Ei koskaan
45-54	Mies	Toinen aste (Lukio tai ammattikoulu)	2	0	Osa-aikainen	Suomi	2018	Pohjois-Savo	En osaa sanoa	Erikoissairaanhoidossa (esim. sairaalan neurologian poliklinikka)		MS-tauti hoitotasapainossa, ei juuri toimintakykyhaittaa				1	0	2	2	1	2	En ollenkaan	En ollenkaan	Kohtalainen	Tyydyttävä	Ei	Ei	Ei	Ei	Ei	Ei	En osaa sanoa	En osaa sanoa	Ei	Ei koskaan	Ei koskaan	Ei koskaan	Ei koskaan	Joskus	Ei koskaan	Harvoin	Harvoin	Harvoin	Harvoin	Ei koskaan	Harvoin	Harvoin	Joskus	Ei koskaan
65-74	Nainen	Opistoasteen tutkinto	1 (Asun yksin)	0	Eläkkeellä (ml. työkyvyttömyyseläke)	Suomi	2001	Helsinki (ja HUS)	Kyllä	Yksityisellä poliklinikalla (esim. yksityinen neurologi)			MS-tauti hoitotasapainossa, arjen toimintakyky alentunut			1	0	4	3	1	3	En ollenkaan	En ollenkaan	Kohtalainen	Tyydyttävä	Kyllä, suurinpiirtein	Kyllä, varmasti	Kyllä	Ei	Ei	Kyllä	Ei	Kyllä	Ei	Ei koskaan	Ei koskaan	En osaa sanoa	Harvoin	Usein	Ei koskaan	Aina	Aina	Aina	Aina	Ei koskaan	Usein	Usein	Usein	Ei koskaan
25-34	Nainen	Ylempi korkeakoulututkinto	5 tai enemmän	3	Muu	Suomi	2016	Varsinais-Suomi	Ei	Erikoissairaanhoidossa (esim. sairaalan neurologian poliklinikka)		MS-tauti hoitotasapainossa, ei juuri toimintakykyhaittaa				1	2	15	0	2	10	En ollenkaan	En ollenkaan	Hyvä	Tyydyttävä	En osaa sanoa	Kyllä, varmasti	En osaa sanoa	Ei	Kyllä	Kyllä	Ei	Kyllä	Ei	Ei koskaan	En osaa sanoa	En osaa sanoa	Usein	Joskus	Usein	Usein	Usein	Usein	Usein	Harvoin	En osaa sanoa	Harvoin	Harvoin	Ei koskaan
25-34	Nainen	Toinen aste (Lukio tai ammattikoulu)	2	0	Osa-aikainen	Suomi	2022	Pirkanmaa	Ei	Erikoissairaanhoidossa (esim. sairaalan neurologian poliklinikka)		MS-tauti hoitotasapainossa, ei juuri toimintakykyhaittaa				5	0	0	4	7	2	En ollenkaan	En ollenkaan	Kohtalainen	Hyvä	Kyllä, suurinpiirtein	Kyllä, suurinpiirtein	Kyllä	Ei	Ei	Kyllä	Ei	Kyllä	Kyllä	Ei koskaan	Ei koskaan	En osaa sanoa	Aina	Usein	Usein	Usein	Usein	Usein	Joskus	Ei koskaan	Joskus	Aina	Aina	Ei koskaan
35-44	Mies	Peruskoulu	2	0	Täysipäiväinen	Suomi	2022	Lappi	Ei	En osaa sanoa		MS-tauti hoitotasapainossa, ei juuri toimintakykyhaittaa				0	0	1	1	0	1	En ollenkaan	En ollenkaan	Tyydyttävä	En osaa sanoa	En osaa sanoa	En osaa sanoa	Kyllä	Ei	Ei	Ei	Ei	Ei	Ei	Ei koskaan	Ei koskaan	Ei koskaan	Ei koskaan	Aina	Ei koskaan	Ei koskaan	Aina	Aina	Aina	Ei koskaan	Usein	Ei koskaan	Ei koskaan	Ei koskaan
55-64	Nainen	Opistoasteen tutkinto	1 (Asun yksin)	0	Eläkkeellä (ml. työkyvyttömyyseläke)	Suomi	1989	Pirkanmaa	Kyllä	Perusterveydenhuollossa (esim. terveyskeskus tai - asema)		MS-tauti hoitotasapainossa, ei juuri toimintakykyhaittaa				0	0	2	0	0	2	En ollenkaan	En ollenkaan	Tyydyttävä	En osaa sanoa	En osaa sanoa	En osaa sanoa	En osaa sanoa	En osaa sanoa	Ei	En osaa sanoa	Ei	En osaa sanoa	Ei	En osaa sanoa	En osaa sanoa	En osaa sanoa	En osaa sanoa	En osaa sanoa	En osaa sanoa	En osaa sanoa	En osaa sanoa	En osaa sanoa	En osaa sanoa	En osaa sanoa	En osaa sanoa	En osaa sanoa	En osaa sanoa	En osaa sanoa
35-44	Nainen	Toinen aste (Lukio tai ammattikoulu)	2	1	Opiskelija	Suomi	2021	Pohjois-Pohjanmaa	Ei	Erikoissairaanhoidossa (esim. sairaalan neurologian poliklinikka)			MS-tauti hoitotasapainossa, arjen toimintakyky alentunut			6	0	3	0	4	2	En ollenkaan	En ollenkaan	Tyydyttävä	Tyydyttävä	Ei	Ei	Kyllä	Kyllä	Kyllä	Ei	Kyllä	Kyllä	Kyllä	Harvoin	Joskus	Usein	Usein	Joskus	Usein	Joskus	Joskus	Joskus	Usein	Ei koskaan	Joskus	Joskus	Joskus	Usein
35-44	Nainen	Toinen aste (Lukio tai ammattikoulu)	5 tai enemmän	3	Eläkkeellä (ml. työkyvyttömyyseläke)	Suomi	2021	Varsinais-Suomi	Kyllä	Erikoissairaanhoidossa (esim. sairaalan neurologian poliklinikka)	Uusi MS-tauti diagnoosi					70	12	10	2	5	10	En ollenkaan	Yli 7 päivää	Huono	Erinomainen	Kyllä, suurinpiirtein	Kyllä, suurinpiirtein	Kyllä	Ei	Ei	Kyllä	Ei	Kyllä	Kyllä	Usein	Ei koskaan	En osaa sanoa	Aina	Harvoin	Usein	Usein	Usein	Joskus	Ei koskaan	Harvoin	Joskus	Usein	Harvoin	Ei koskaan
45-54	Nainen	Ylempi korkeakoulututkinto	2	0	Täysipäiväinen	Suomi	2004	Keski-Suomi	Ei	Erikoissairaanhoidossa (esim. sairaalan neurologian poliklinikka)		MS-tauti hoitotasapainossa, ei juuri toimintakykyhaittaa				10	0	15	2	3-4	9	En ollenkaan	En ollenkaan	Hyvä	Erinomainen	Kyllä, suurinpiirtein	Kyllä, suurinpiirtein	Kyllä	Ei	Ei	Kyllä	Ei	Ei	Ei	Harvoin	Ei koskaan	En osaa sanoa	Harvoin	Aina	Joskus	Aina	Aina	Aina	Aina	Ei koskaan	Usein	Harvoin	Usein	Harvoin
45-54	Mies	Toinen aste (Lukio tai ammattikoulu)	2	0	Opiskelija	Suomi	2021	Helsinki (ja HUS)	Ei	Perusterveydenhuollossa (esim. terveyskeskus tai - asema)			MS-tauti hoitotasapainossa, arjen toimintakyky alentunut			3	2	1	0	2	2	En ollenkaan	En ollenkaan	Huono	Kohtalainen	Ei	Ei	Kyllä	Kyllä	Kyllä	Kyllä	Ei	Kyllä	Kyllä	Ei koskaan	Ei koskaan	Ei koskaan	Harvoin	Aina	Joskus	Usein	Usein	Usein	Aina	Harvoin	Usein	Harvoin	Harvoin	Joskus
25-34	Nainen	Ylempi korkeakoulututkinto	2	0	Täysipäiväinen	Suomi	2023	Pohjois-Pohjanmaa	Ei	Erikoissairaanhoidossa (esim. sairaalan neurologian poliklinikka)	Uusi MS-tauti diagnoosi					7	0	2	0	2	2	En ollenkaan	Alle 7 päivää	Erinomainen	Hyvä	Kyllä, suurinpiirtein	Kyllä, suurinpiirtein	Kyllä	Kyllä	Kyllä	Kyllä	Ei	Ei	Ei	Ei koskaan	Ei koskaan	En osaa sanoa	Joskus	Usein	Joskus	Usein	Usein	Aina	Usein	Harvoin	Usein	Joskus	Usein	Joskus
35-44	Mies	Toinen aste (Lukio tai ammattikoulu)	2	0	Täysipäiväinen	Suomi	2018	Länsi-Uusimaa (ja HUS)	Ei	Erikoissairaanhoidossa (esim. sairaalan neurologian poliklinikka)		MS-tauti hoitotasapainossa, ei juuri toimintakykyhaittaa	MS-tauti hoitotasapainossa, arjen toimintakyky alentunut			1	1	10	0	2	5	En ollenkaan	En ollenkaan	Tyydyttävä	Tyydyttävä	Ei	Ei	Kyllä	Kyllä	Kyllä	Kyllä	Ei	Kyllä	Ei	Ei koskaan	Ei koskaan	En osaa sanoa	Joskus	Usein	Joskus	Usein	Usein	Usein	Usein	Harvoin	Usein	Harvoin	En osaa sanoa	Ei koskaan
65-74	Nainen	Opistoasteen tutkinto	2	0	Eläkkeellä (ml. työkyvyttömyyseläke)	Suomi	2010	Länsi-Uusimaa (ja HUS)	Kyllä	Perusterveydenhuollossa (esim. terveyskeskus tai - asema)			MS-tauti hoitotasapainossa, arjen toimintakyky alentunut			0	0	3	5	0	4	En ollenkaan	En ollenkaan	Kohtalainen	Kohtalainen	Ei	Kyllä, suurinpiirtein	Ei	Ei	Ei	Ei	Kyllä	Kyllä	Ei	En osaa sanoa	En osaa sanoa	En osaa sanoa	Usein	Harvoin	Ei koskaan	Joskus	Joskus	Usein	Usein	Joskus	Joskus	Harvoin	Usein	Usein
45-54	Mies	Ylempi korkeakoulututkinto	4	2	Täysipäiväinen	Suomi	2011	Helsinki (ja HUS)	Kyllä	Erikoissairaanhoidossa (esim. sairaalan neurologian poliklinikka)		MS-tauti hoitotasapainossa, ei juuri toimintakykyhaittaa				1	0	0	2	1	1	En ollenkaan	En ollenkaan	Hyvä	Hyvä	Ei	Kyllä, suurinpiirtein	Kyllä	Kyllä	Ei	Kyllä	Ei	Ei	Ei	Joskus	Ei koskaan	En osaa sanoa	Harvoin	Aina	Harvoin	Aina	Usein	Aina	Usein	Usein	Usein	Harvoin	Aina	En osaa sanoa
45-54	Nainen	Alempi korkeakoulututkinto	2	0	Täysipäiväinen	Suomi	2019	Keski-Suomi	Kyllä	Erikoissairaanhoidossa (esim. sairaalan neurologian poliklinikka)				MS-tauti ei hoitotasapainossa (esim. pahenemisvaihe)		5	0	0	0	5	1	En ollenkaan	En ollenkaan	Tyydyttävä	Tyydyttävä	Ei	Ei	Kyllä	Ei	Ei	Ei	Kyllä	Kyllä	Ei	Harvoin	Ei koskaan	En osaa sanoa	Aina	Joskus	Harvoin	Usein	Usein	Usein	Usein	Joskus	Usein	Usein	Joskus	Ei koskaan
55-64	Nainen	Ylempi korkeakoulututkinto	2	0	Täysipäiväinen	Suomi	2017	Pirkanmaa	Ei	Erikoissairaanhoidossa (esim. sairaalan neurologian poliklinikka)		MS-tauti hoitotasapainossa, ei juuri toimintakykyhaittaa				2	0	1	0	2	1	En ollenkaan	En ollenkaan	Tyydyttävä	Hyvä	Kyllä, suurinpiirtein	Kyllä, suurinpiirtein	Kyllä	Ei	Ei	Kyllä	En osaa sanoa	En osaa sanoa	Ei	Ei koskaan	Ei koskaan	En osaa sanoa	Usein	Joskus	Joskus	Joskus	Joskus	Usein	Usein	Ei koskaan	Harvoin	Ei koskaan	En osaa sanoa	Ei koskaan
35-44	Nainen	Toinen aste (Lukio tai ammattikoulu)	4	2	Työtön	Suomi	2020	Satakunta	Ei	Erikoissairaanhoidossa (esim. sairaalan neurologian poliklinikka)				MS-tauti ei hoitotasapainossa (esim. pahenemisvaihe)		60	0	55	0	20	20	Alle 7 päivää	En ollenkaan	Huono	Huono	Ei	Ei	En osaa sanoa	Ei	Ei	Kyllä	Kyllä	Kyllä	Kyllä	Usein	Ei koskaan	En osaa sanoa	Aina	Harvoin	Harvoin	Ei koskaan	Harvoin	Harvoin	Ei koskaan	Harvoin	Ei koskaan	Harvoin	Ei koskaan	Ei koskaan
35-44	Nainen	Toinen aste (Lukio tai ammattikoulu)	3	2	Osa-aikainen	Suomi	2013	Pohjois-Pohjanmaa	Ei	Erikoissairaanhoidossa (esim. sairaalan neurologian poliklinikka)		MS-tauti hoitotasapainossa, ei juuri toimintakykyhaittaa				2	0	2	3	2	5	En ollenkaan	En ollenkaan	Tyydyttävä	Tyydyttävä	Ei	Ei	Ei	Kyllä	Ei	Kyllä	Ei	Kyllä	Ei	Ei koskaan	Ei koskaan	En osaa sanoa	Harvoin	En osaa sanoa	Ei koskaan	Usein	Joskus	Joskus	Usein	Ei koskaan	En osaa sanoa	Ei koskaan	Joskus	Ei koskaan
45-54	Nainen	Alempi korkeakoulututkinto	3	1	Osa-aikainen	Suomi	2007	Etelä-Pohjanmaa	Ei	Erikoissairaanhoidossa (esim. sairaalan neurologian poliklinikka)		MS-tauti hoitotasapainossa, ei juuri toimintakykyhaittaa				1	0	2	1	1	4	En ollenkaan	En ollenkaan	Hyvä	Hyvä	Ei	Ei	Kyllä	Kyllä	Ei	Kyllä	Ei	Ei	Ei	Ei koskaan	Ei koskaan	En osaa sanoa	Joskus	Usein	Joskus	Usein	Usein	Usein	Usein	Joskus	Joskus	Harvoin	En osaa sanoa	Ei koskaan
55-64	Mies	Opistoasteen tutkinto	1 (Asun yksin)	0	Täysipäiväinen	Suomi	2023	Päijät-Häme	Kyllä	Erikoissairaanhoidossa (esim. sairaalan neurologian poliklinikka)			MS-tauti hoitotasapainossa, arjen toimintakyky alentunut			10	5	4	4	4	4	En ollenkaan	Alle 7 päivää	Tyydyttävä	Hyvä	En osaa sanoa	Ei	Kyllä	Kyllä	Kyllä	Kyllä	En osaa sanoa	Kyllä	Kyllä	Harvoin	Ei koskaan	En osaa sanoa	Joskus	Usein	Joskus	Aina	Aina	Aina	Usein	Usein	Usein	Usein	Usein	Joskus
35-44	Nainen	Alempi korkeakoulututkinto	4	2	Muu	Ruotsi	2021	Varsinais-Suomi	Kyllä	Erikoissairaanhoidossa (esim. sairaalan neurologian poliklinikka)		MS-tauti hoitotasapainossa, ei juuri toimintakykyhaittaa				1	1	2	0	5	3	En ollenkaan	Alle 7 päivää	Hyvä	Erinomainen	En osaa sanoa	En osaa sanoa	Kyllä	Kyllä	Kyllä	Kyllä	Ei	Kyllä	Kyllä	Harvoin	En osaa sanoa	En osaa sanoa	Ei koskaan	Aina	Aina	Aina	Aina	Aina	Aina	Aina	Aina	Aina	Aina	Aina
45-54	Nainen	Toinen aste (Lukio tai ammattikoulu)	2	0	Eläkkeellä (ml. työkyvyttömyyseläke)	Suomi	2011	Pirkanmaa	Kyllä	Erikoissairaanhoidossa (esim. sairaalan neurologian poliklinikka)			MS-tauti hoitotasapainossa, arjen toimintakyky alentunut			1	0	1	0	2	2	En ollenkaan	Yli 7 päivää	Kohtalainen	Kohtalainen	Kyllä, suurinpiirtein	Kyllä, varmasti	Ei	Kyllä	Ei	En osaa sanoa	Ei	Ei	Ei	Ei koskaan	Ei koskaan	En osaa sanoa	Harvoin	Usein	Harvoin	Harvoin	Joskus	Harvoin	Aina	Ei koskaan	Ei koskaan	Ei koskaan	Harvoin	Ei koskaan
35-44	Mies	Alempi korkeakoulututkinto	1 (Asun yksin)	0	Työtön	Suomi	2021	Helsinki (ja HUS)	Ei	Erikoissairaanhoidossa (esim. sairaalan neurologian poliklinikka)		MS-tauti hoitotasapainossa, ei juuri toimintakykyhaittaa				7	0	1	0	4	2	En ollenkaan	Alle 7 päivää	Hyvä	Erinomainen	Kyllä, varmasti	Kyllä, varmasti	Kyllä	Kyllä	Kyllä	Kyllä	Ei	Kyllä	Kyllä	Harvoin	Ei koskaan	Ei koskaan	Ei koskaan	Aina	Usein	Aina	Aina	Aina	Aina	Usein	Aina	Aina	Aina	Usein
55-64	Nainen	Toinen aste (Lukio tai ammattikoulu)	1 (Asun yksin)	0	Eläkkeellä (ml. työkyvyttömyyseläke)	Suomi	2012	Päijät-Häme	Ei	Erikoissairaanhoidossa (esim. sairaalan neurologian poliklinikka)		MS-tauti hoitotasapainossa, ei juuri toimintakykyhaittaa				0	0	6	2	0	2	En ollenkaan	Alle 7 päivää	Tyydyttävä	Hyvä	Ei	Ei	Kyllä	Kyllä	Ei	Kyllä	Ei	Kyllä	Ei	Ei koskaan	Ei koskaan	En osaa sanoa	Usein	Usein	Aina	Usein	Aina	Aina	Aina	Ei koskaan	Aina	Usein	Aina	Harvoin
55-64	Nainen	Toinen aste (Lukio tai ammattikoulu)	1 (Asun yksin)	0	Eläkkeellä (ml. työkyvyttömyyseläke)	Suomi	2005	Länsi-Uusimaa (ja HUS)	Ei	Erikoissairaanhoidossa (esim. sairaalan neurologian poliklinikka)		MS-tauti hoitotasapainossa, ei juuri toimintakykyhaittaa				2	4	0	0	2	0	En ollenkaan	Yli 7 päivää	Hyvä	Hyvä	Kyllä, varmasti	Kyllä, varmasti	Kyllä	Kyllä	Ei	Kyllä	Ei	Ei	Ei	En osaa sanoa	En osaa sanoa	En osaa sanoa	Aina	Aina	Joskus	Aina	Aina	Aina	Aina	Harvoin	Harvoin	Joskus	Joskus	Harvoin
35-44	Nainen	Toinen aste (Lukio tai ammattikoulu)	2	1	Eläkkeellä (ml. työkyvyttömyyseläke)	Suomi	2004	Länsi-Uusimaa (ja HUS)	Ei	Perusterveydenhuollossa (esim. terveyskeskus tai - asema)			MS-tauti hoitotasapainossa, arjen toimintakyky alentunut			4	0	0	0	2	2	En ollenkaan	En ollenkaan	Tyydyttävä	Tyydyttävä	Ei	Ei	Kyllä	Kyllä	Kyllä	Ei	Kyllä	Kyllä	Ei	Harvoin	Ei koskaan	En osaa sanoa	Aina	Joskus	Harvoin	Joskus	Joskus	Joskus	Harvoin	Ei koskaan	Harvoin	Harvoin	Joskus	Ei koskaan
45-54	Nainen	Alempi korkeakoulututkinto	2	0	Osa-aikainen	Suomi	2017	Pohjois-Savo	Ei	Erikoissairaanhoidossa (esim. sairaalan neurologian poliklinikka)			MS-tauti hoitotasapainossa, arjen toimintakyky alentunut			4	2	5	1	2	4	En ollenkaan	En ollenkaan	Tyydyttävä	Hyvä	Kyllä, suurinpiirtein	Kyllä, suurinpiirtein	Ei	Ei	Kyllä	Kyllä	Ei	Kyllä	Kyllä	Ei koskaan	Ei koskaan	En osaa sanoa	Harvoin	Usein	Usein	Usein	Usein	Usein	Usein	Joskus	Joskus	Usein	Joskus	Harvoin
45-54	Mies	Ylempi korkeakoulututkinto	3	1	Eläkkeellä (ml. työkyvyttömyyseläke)	Suomi	2019	Etelä-Pohjanmaa	Ei	Erikoissairaanhoidossa (esim. sairaalan neurologian poliklinikka)			MS-tauti hoitotasapainossa, arjen toimintakyky alentunut			30	1	1	1	5	2	Alle 7 päivää	Alle 7 päivää	Tyydyttävä	Hyvä	En osaa sanoa	En osaa sanoa	Kyllä	En osaa sanoa	Ei	Kyllä	Ei	En osaa sanoa	En osaa sanoa	Ei koskaan	Ei koskaan	Ei koskaan	Ei koskaan	Aina	Usein	Aina	Aina	Aina	Usein	Harvoin	Aina	Joskus	Usein	Joskus
45-54	Nainen	Toinen aste (Lukio tai ammattikoulu)	2	1	Eläkkeellä (ml. työkyvyttömyyseläke)	Suomi	2011	Etelä-Karjala	Ei	Erikoissairaanhoidossa (esim. sairaalan neurologian poliklinikka)			MS-tauti hoitotasapainossa, arjen toimintakyky alentunut			1	0	4	2	2	5	En ollenkaan	En ollenkaan	Huono	Hyvä	Kyllä, suurinpiirtein	Kyllä, suurinpiirtein	Kyllä	Ei	Ei	En osaa sanoa	Ei	Kyllä	Ei	Ei koskaan	Ei koskaan	En osaa sanoa	Harvoin	Usein	Joskus	Usein	Usein	Usein	Usein	Harvoin	En osaa sanoa	Joskus	Usein	Harvoin
35-44	Nainen	Ylempi korkeakoulututkinto	2	0	Täysipäiväinen	Ruotsi	2016	Varsinais-Suomi	Ei	Erikoissairaanhoidossa (esim. sairaalan neurologian poliklinikka)		MS-tauti hoitotasapainossa, ei juuri toimintakykyhaittaa				0	3	5	2	2	2	En ollenkaan	En ollenkaan	Erinomainen	Hyvä	Kyllä, suurinpiirtein	Kyllä, suurinpiirtein	Kyllä	Ei	Kyllä	Ei	Ei	Ei	Ei	Harvoin	Ei koskaan	En osaa sanoa	Usein	Usein	Joskus	Usein	Usein	Usein	Aina	Ei koskaan	Harvoin	Joskus	Aina	Joskus
25-34	Nainen	Toinen aste (Lukio tai ammattikoulu)	3	1	Osa-aikainen	Suomi	2021	Pirkanmaa	Kyllä	Erikoissairaanhoidossa (esim. sairaalan neurologian poliklinikka)			MS-tauti hoitotasapainossa, arjen toimintakyky alentunut			1	2	3	3	2	2	En ollenkaan	En ollenkaan	Tyydyttävä	Hyvä	Kyllä, suurinpiirtein	Kyllä, varmasti	Kyllä	Kyllä	Kyllä	Kyllä	Ei	Ei	Ei	Ei koskaan	Ei koskaan	Ei koskaan	Harvoin	Aina	Joskus	Usein	Usein	Usein	Aina	Harvoin	Usein	Joskus	Usein	Ei koskaan
65-74	Nainen	Toinen aste (Lukio tai ammattikoulu)	2	0	Eläkkeellä (ml. työkyvyttömyyseläke)	Suomi	2003	Pohjois-Pohjanmaa	Ei	Erikoissairaanhoidossa (esim. sairaalan neurologian poliklinikka)			MS-tauti hoitotasapainossa, arjen toimintakyky alentunut			2	1	3	1	3	1	En ollenkaan	Yli 7 päivää	Tyydyttävä	Hyvä	Kyllä, suurinpiirtein	Ei	Kyllä	Kyllä	Kyllä	Kyllä	Ei	Kyllä	Ei	Ei koskaan	Ei koskaan	En osaa sanoa	Harvoin	Aina	En osaa sanoa	Aina	Aina	Aina	Aina	Joskus	Usein	Aina	Usein	Usein
45-54	Mies	Ylempi korkeakoulututkinto	5 tai enemmän	3	Täysipäiväinen	Suomi	2005	Varsinais-Suomi	Kyllä	Erikoissairaanhoidossa (esim. sairaalan neurologian poliklinikka)		MS-tauti hoitotasapainossa, ei juuri toimintakykyhaittaa				2	2	2	2	3	2	Alle 7 päivää	En ollenkaan	Hyvä	Hyvä	Kyllä, suurinpiirtein	Kyllä, varmasti	En osaa sanoa	Kyllä	Kyllä	Kyllä	Ei	Ei	Kyllä	Joskus	Harvoin	Ei koskaan	Joskus	Joskus	Usein	Usein	Aina	Usein	Usein	Joskus	Usein	Usein	Aina	Usein
25-34	Nainen	En halua sanoa	2	0	Täysipäiväinen	Suomi	2022	Varsinais-Suomi	Ei	Erikoissairaanhoidossa (esim. sairaalan neurologian poliklinikka)			MS-tauti hoitotasapainossa, arjen toimintakyky alentunut			12	0	4	0	3	4	En ollenkaan	Yli 7 päivää	Tyydyttävä	Hyvä	Kyllä, suurinpiirtein	Kyllä, varmasti	Kyllä	Kyllä	Kyllä	En osaa sanoa	Kyllä	Kyllä	Kyllä	Ei koskaan	Harvoin	Aina	Aina	Joskus	Harvoin	Joskus	Joskus	Joskus	Usein	Joskus	Harvoin	Harvoin	Harvoin	Harvoin
25-34	Muu	Ylempi korkeakoulututkinto	1 (Asun yksin)	0	Täysipäiväinen	Suomi	2015	Helsinki (ja HUS)	Ei	Erikoissairaanhoidossa (esim. sairaalan neurologian poliklinikka)		MS-tauti hoitotasapainossa, ei juuri toimintakykyhaittaa				1	0	10	5	2	8	En ollenkaan	En ollenkaan	Hyvä	Hyvä	Kyllä, suurinpiirtein	Kyllä, suurinpiirtein	Kyllä	Kyllä	Kyllä	Kyllä	Ei	Kyllä	Ei	Ei koskaan	Ei koskaan	En osaa sanoa	Ei koskaan	Usein	Aina	Aina	Usein	Aina	Joskus	Ei koskaan	Aina	Ei koskaan	Aina	Ei koskaan
45-54	Nainen	Ylempi korkeakoulututkinto	2	0	Täysipäiväinen	Suomi	2009	Pohjois-Pohjanmaa	Kyllä	Erikoissairaanhoidossa (esim. sairaalan neurologian poliklinikka)		MS-tauti hoitotasapainossa, ei juuri toimintakykyhaittaa				1	2	5	10	2	4	En ollenkaan	En ollenkaan	Kohtalainen	Hyvä	Ei	Kyllä, suurinpiirtein	Kyllä	Ei	Kyllä	Kyllä	Kyllä	Kyllä	Kyllä	Ei koskaan	Ei koskaan	En osaa sanoa	Usein	Usein	Usein	Usein	Usein	Usein	Usein	Ei koskaan	Usein	Joskus	Usein	Harvoin
45-54	Nainen	Ylempi korkeakoulututkinto	3	0	Täysipäiväinen	Suomi	2015	Satakunta	Kyllä	Erikoissairaanhoidossa (esim. sairaalan neurologian poliklinikka)		MS-tauti hoitotasapainossa, ei juuri toimintakykyhaittaa				1	0	5	0	2	1	En ollenkaan	En ollenkaan	Hyvä	Hyvä	Kyllä, suurinpiirtein	Kyllä, suurinpiirtein	Kyllä	Ei	Ei	Kyllä	Ei	Ei	Ei	Ei koskaan	Ei koskaan	En osaa sanoa	Joskus	Harvoin	Harvoin	Usein	Usein	Usein	Aina	Harvoin	En osaa sanoa	Harvoin	Joskus	En osaa sanoa
45-54	Mies	Toinen aste (Lukio tai ammattikoulu)	2	0	Täysipäiväinen	Suomi	2018	Kymenlaakso	Ei	Erikoissairaanhoidossa (esim. sairaalan neurologian poliklinikka)			MS-tauti hoitotasapainossa, arjen toimintakyky alentunut			0	0	8	0	0	4	En ollenkaan	En ollenkaan	Tyydyttävä	Hyvä	Kyllä, suurinpiirtein	Kyllä, suurinpiirtein	Kyllä	Kyllä	Ei	Kyllä	Ei	Ei	Kyllä	Ei koskaan	Ei koskaan	Ei koskaan	Harvoin	Usein	Usein	Usein	Usein	Usein	Usein	Harvoin	Usein	Joskus	Joskus	Ei koskaan
35-44	Nainen	Ylempi korkeakoulututkinto	4	2	Täysipäiväinen	Ruotsi	2022	Länsi-Uusimaa (ja HUS)	Ei	Erikoissairaanhoidossa (esim. sairaalan neurologian poliklinikka)		MS-tauti hoitotasapainossa, ei juuri toimintakykyhaittaa				1	0	2	1	1	2	En ollenkaan	En ollenkaan	Hyvä	Tyydyttävä	En osaa sanoa	Ei	Kyllä	Ei	Kyllä	Kyllä	Ei	Kyllä	Ei	Ei koskaan	Ei koskaan	En osaa sanoa	Joskus	Usein	Joskus	Usein	Joskus	Joskus	Joskus	Ei koskaan	Joskus	Harvoin	Usein	Joskus
45-54	Nainen	Ylempi korkeakoulututkinto	4	2	Eläkkeellä (ml. työkyvyttömyyseläke)	Suomi	2018	Pohjois-Pohjanmaa	Ei	Erikoissairaanhoidossa (esim. sairaalan neurologian poliklinikka)			MS-tauti hoitotasapainossa, arjen toimintakyky alentunut			4	2	1	0	5	1	En ollenkaan	Yli 7 päivää	Tyydyttävä	Hyvä	Ei	Ei	Kyllä	Ei	Kyllä	Kyllä	Kyllä	Kyllä	Ei	Harvoin	Ei koskaan	En osaa sanoa	Usein	Joskus	Harvoin	Usein	Usein	Usein	Aina	Ei koskaan	Joskus	Joskus	Joskus	Ei koskaan
45-54	Mies	Opistoasteen tutkinto	2	0	Täysipäiväinen	Suomi	2020	Pohjois-Pohjanmaa	Ei	Erikoissairaanhoidossa (esim. sairaalan neurologian poliklinikka)			MS-tauti hoitotasapainossa, arjen toimintakyky alentunut			1	2	10	5	1	10	En ollenkaan	En ollenkaan	Tyydyttävä	Huono	Ei	Ei	Ei	Ei	Kyllä	Kyllä	Kyllä	Kyllä	Ei	Harvoin	Ei koskaan	En osaa sanoa	Usein	Harvoin	Harvoin	Harvoin	Harvoin	Harvoin	Usein	Ei koskaan	Harvoin	Harvoin	Harvoin	Ei koskaan
35-44	Nainen	Alempi korkeakoulututkinto	2	1	Täysipäiväinen	Ruotsi	2020	Pohjanmaa	Ei	Erikoissairaanhoidossa (esim. sairaalan neurologian poliklinikka)		MS-tauti hoitotasapainossa, ei juuri toimintakykyhaittaa				1	1	5	0	2	5	En ollenkaan	En ollenkaan	Hyvä	Hyvä	Ei	Ei	Kyllä	Ei	Ei	Kyllä	Kyllä	Kyllä	Ei	Ei koskaan	Ei koskaan	En osaa sanoa	Joskus	Usein	Harvoin	Usein	Joskus	Usein	Usein	Ei koskaan	Joskus	Harvoin	Joskus	Ei koskaan
35-44	Nainen	Toinen aste (Lukio tai ammattikoulu)	1 (Asun yksin)	0	Täysipäiväinen	Suomi	2022	Pohjois-Savo	Ei	Erikoissairaanhoidossa (esim. sairaalan neurologian poliklinikka)			MS-tauti hoitotasapainossa, arjen toimintakyky alentunut	MS-tauti ei hoitotasapainossa (esim. pahenemisvaihe)		10	10	10	10	En jaksa muistaa	10	En halua sanoa	Alle 7 päivää	Kohtalainen	Hyvä	Ei	Ei	Ei	Kyllä	Kyllä	Kyllä	Ei	Kyllä	Ei	Ei koskaan	Ei koskaan	En osaa sanoa	Harvoin	Usein	Joskus	Usein	Usein	Usein	Usein	Ei koskaan	En osaa sanoa	Ei koskaan	En osaa sanoa	Harvoin
55-64	Nainen	Opistoasteen tutkinto	2	0	Eläkkeellä (ml. työkyvyttömyyseläke)	Suomi	2000	Etelä-Pohjanmaa	Kyllä	Erikoissairaanhoidossa (esim. sairaalan neurologian poliklinikka)			MS-tauti hoitotasapainossa, arjen toimintakyky alentunut			12	2	4	1	55	5	En ollenkaan	En ollenkaan	Kohtalainen	Hyvä	Kyllä, varmasti	Ei	Kyllä	Kyllä	Kyllä	Kyllä	Ei	Ei	Kyllä	Ei koskaan	Ei koskaan	En osaa sanoa	Ei koskaan	Aina	Usein	Aina	Aina	Aina	Usein	En osaa sanoa	Aina	Aina	Aina	Joskus
35-44	Nainen	Ylempi korkeakoulututkinto	2	0	Osa-aikainen	Suomi	2022	Pohjois-Pohjanmaa	Ei	Erikoissairaanhoidossa (esim. sairaalan neurologian poliklinikka)			MS-tauti hoitotasapainossa, arjen toimintakyky alentunut			28	2	28	0	4	3	En ollenkaan	Yli 7 päivää	Kohtalainen	Tyydyttävä	En osaa sanoa	En osaa sanoa	Kyllä	En osaa sanoa	Ei	En osaa sanoa	Ei	Kyllä	Ei	En osaa sanoa	Ei koskaan	En osaa sanoa	Aina	Joskus	Harvoin	Joskus	Joskus	Usein	Harvoin	Ei koskaan	En osaa sanoa	Harvoin	Joskus	Ei koskaan
55-64	Nainen	Alempi korkeakoulututkinto	1 (Asun yksin)	0	Eläkkeellä (ml. työkyvyttömyyseläke)	Suomi	1999	Päijät-Häme	Kyllä	Perusterveydenhuollossa (esim. terveyskeskus tai - asema)				MS-tauti ei hoitotasapainossa (esim. pahenemisvaihe)		55	2	2	0	2	1	En ollenkaan	En ollenkaan	Kohtalainen	Kohtalainen	Ei	Ei	Kyllä	En osaa sanoa	Ei	Ei	Kyllä	Kyllä	Ei	Joskus	Harvoin	Joskus	Aina	Joskus	Joskus	Joskus	Harvoin	Joskus	Joskus	Joskus	Joskus	Joskus	Joskus	Joskus
65-74	Mies	Opistoasteen tutkinto	2	0	Eläkkeellä (ml. työkyvyttömyyseläke)	Suomi	2020	Pohjois-Savo	Ei	Erikoissairaanhoidossa (esim. sairaalan neurologian poliklinikka)			MS-tauti hoitotasapainossa, arjen toimintakyky alentunut			10	5	5	10	5	5	En ollenkaan	Yli 7 päivää	Kohtalainen	Hyvä	Kyllä, suurinpiirtein	Kyllä, suurinpiirtein	Kyllä	Kyllä	Kyllä	Kyllä	Ei	Kyllä	En osaa sanoa	Harvoin	Joskus	Aina	Joskus	Aina	Harvoin	Usein	Aina	Aina	Usein	En osaa sanoa	Usein	Usein	Usein	Joskus
45-54	Nainen	Opistoasteen tutkinto	3	0	Eläkkeellä (ml. työkyvyttömyyseläke)	Suomi	2017	Pohjois-Savo	Ei	Erikoissairaanhoidossa (esim. sairaalan neurologian poliklinikka)			MS-tauti hoitotasapainossa, arjen toimintakyky alentunut			2	3	0	0	4	0	Alle 7 päivää	Yli 7 päivää	Hyvä	Erinomainen	Kyllä, varmasti	Kyllä, varmasti	Kyllä	Kyllä	Kyllä	Kyllä	Ei	Ei	Kyllä	En osaa sanoa	Ei koskaan	En osaa sanoa	Joskus	Aina	Aina	Aina	Aina	Aina	Aina	Usein	Aina	Aina	Aina	Usein
55-64	Nainen	Opistoasteen tutkinto	2	0	Eläkkeellä (ml. työkyvyttömyyseläke)	Suomi	1999	Pohjois-Savo	Ei	En osaa sanoa		MS-tauti hoitotasapainossa, ei juuri toimintakykyhaittaa				0	0	3	2	0	4	En ollenkaan	En ollenkaan	Kohtalainen	En osaa sanoa	Ei	Kyllä, suurinpiirtein	Kyllä	En osaa sanoa	Ei	Kyllä	Ei	Kyllä	Ei	En osaa sanoa	Ei koskaan	En osaa sanoa	En osaa sanoa	En osaa sanoa	En osaa sanoa	En osaa sanoa	En osaa sanoa	En osaa sanoa	En osaa sanoa	En osaa sanoa	En osaa sanoa	En osaa sanoa	En osaa sanoa	En osaa sanoa
55-64	Nainen	Opistoasteen tutkinto	2	0	Eläkkeellä (ml. työkyvyttömyyseläke)	Suomi	2007	Etelä-Karjala	Kyllä	Perusterveydenhuollossa (esim. terveyskeskus tai - asema)			MS-tauti hoitotasapainossa, arjen toimintakyky alentunut			30	0	1	0	2	0	En ollenkaan	En ollenkaan	Tyydyttävä	Hyvä	Kyllä, suurinpiirtein	En osaa sanoa	Ei	Kyllä	Ei	En osaa sanoa	Ei	Ei	Ei	Ei koskaan	Ei koskaan	En osaa sanoa	Joskus	Usein	Usein	Joskus	Usein	Usein	Usein	Ei koskaan	Usein	Joskus	Joskus	Joskus
35-44	Nainen	Alempi korkeakoulututkinto	4	2	Osa-aikainen	Suomi	2007	Pirkanmaa	Ei	Erikoissairaanhoidossa (esim. sairaalan neurologian poliklinikka)		MS-tauti hoitotasapainossa, ei juuri toimintakykyhaittaa				1	3	2	1	2	1	En ollenkaan	En ollenkaan	Hyvä	Hyvä	Kyllä, suurinpiirtein	Ei	Kyllä	Kyllä	Kyllä	Kyllä	Ei	Kyllä	En osaa sanoa	Ei koskaan	Ei koskaan	En osaa sanoa	Harvoin	Usein	Joskus	Usein	Usein	Aina	Aina	Harvoin	Usein	Joskus	Usein	Joskus
45-54	Mies	Toinen aste (Lukio tai ammattikoulu)	2	0	Täysipäiväinen	Suomi	2012	Pohjanmaa	Ei	Erikoissairaanhoidossa (esim. sairaalan neurologian poliklinikka)		MS-tauti hoitotasapainossa, ei juuri toimintakykyhaittaa				5	0	0	1	5	1	En ollenkaan	En ollenkaan	Tyydyttävä	Hyvä	Kyllä, suurinpiirtein	Kyllä, suurinpiirtein	Kyllä	Kyllä	Kyllä	Kyllä	Ei	Ei	Ei	Ei koskaan	Ei koskaan	En osaa sanoa	Joskus	Usein	Usein	Usein	Usein	Usein	Usein	Harvoin	Joskus	Joskus	Usein	Harvoin
25-34	Nainen	Toinen aste (Lukio tai ammattikoulu)	1 (Asun yksin)	0	Osa-aikainen	Suomi	2016	Varsinais-Suomi	Kyllä	Erikoissairaanhoidossa (esim. sairaalan neurologian poliklinikka)			MS-tauti hoitotasapainossa, arjen toimintakyky alentunut			100	5	15	5	15	0	En ollenkaan	En ollenkaan	Tyydyttävä	Kohtalainen	Ei	Ei	Kyllä	Ei	Kyllä	Kyllä	Ei	Kyllä	Ei	Harvoin	Ei koskaan	Ei koskaan	Harvoin	Joskus	Ei koskaan	Usein	Joskus	Harvoin	Joskus	Ei koskaan	Ei koskaan	Ei koskaan	Ei koskaan	Ei koskaan
35-44	Nainen	Toinen aste (Lukio tai ammattikoulu)	3	1	Eläkkeellä (ml. työkyvyttömyyseläke)	Suomi	2007	Pirkanmaa	Kyllä	Perusterveydenhuollossa (esim. terveyskeskus tai - asema)			MS-tauti hoitotasapainossa, arjen toimintakyky alentunut			0	0	0	0	0	0	En ollenkaan	En ollenkaan	Hyvä	En osaa sanoa	Ei	Ei	Kyllä	Kyllä	Ei	Ei	Ei	Ei	Ei	En osaa sanoa	En osaa sanoa	En osaa sanoa	En osaa sanoa	En osaa sanoa	En osaa sanoa	En osaa sanoa	En osaa sanoa	En osaa sanoa	En osaa sanoa	En osaa sanoa	En osaa sanoa	En osaa sanoa	En osaa sanoa	En osaa sanoa
45-54	Nainen	Alempi korkeakoulututkinto	3	1	Täysipäiväinen	Ruotsi	2020	Varsinais-Suomi	Kyllä	Erikoissairaanhoidossa (esim. sairaalan neurologian poliklinikka)		MS-tauti hoitotasapainossa, ei juuri toimintakykyhaittaa				1	0	2	0	1	1	En ollenkaan	En ollenkaan	Hyvä	Hyvä	Kyllä, suurinpiirtein	Kyllä, varmasti	Kyllä	Kyllä	Kyllä	Kyllä	Ei	Ei	Kyllä	Ei koskaan	Ei koskaan	En osaa sanoa	Joskus	Aina	En osaa sanoa	Aina	Aina	Aina	Aina	Harvoin	En osaa sanoa	Usein	Usein	Usein
45-54	Nainen	Alempi korkeakoulututkinto	2	0	Muu	Suomi	2015	Satakunta	Ei	Erikoissairaanhoidossa (esim. sairaalan neurologian poliklinikka)			MS-tauti hoitotasapainossa, arjen toimintakyky alentunut			1	0	4	2	3	11	En ollenkaan	En ollenkaan	Kohtalainen	Hyvä	Ei	Ei	Kyllä	Ei	Ei	Kyllä	Kyllä	Kyllä	En osaa sanoa	Ei koskaan	Ei koskaan	En osaa sanoa	Joskus	Usein	Usein	Usein	Usein	Usein	Usein	Usein	Usein	Usein	Usein	Usein
35-44	Nainen	Toinen aste (Lukio tai ammattikoulu)	3	2	Eläkkeellä (ml. työkyvyttömyyseläke)	Suomi	2009	Varsinais-Suomi	Ei	Erikoissairaanhoidossa (esim. sairaalan neurologian poliklinikka)			MS-tauti hoitotasapainossa, arjen toimintakyky alentunut			1	2	12	0	2	4	En ollenkaan	En ollenkaan	Tyydyttävä	Hyvä	Kyllä, suurinpiirtein	Kyllä, suurinpiirtein	Kyllä	Ei	Kyllä	Kyllä	Kyllä	Kyllä	Ei	Joskus	Ei koskaan	En osaa sanoa	Usein	Joskus	Harvoin	Usein	Joskus	Joskus	Usein	Harvoin	Joskus	Usein	Joskus	Harvoin
55-64	Nainen	Ylempi korkeakoulututkinto	2	0	Täysipäiväinen	Suomi	1989	Helsinki (ja HUS)	Ei	Yksityisellä poliklinikalla (esim. yksityinen neurologi)		MS-tauti hoitotasapainossa, ei juuri toimintakykyhaittaa				1	1	4	2	1	2	En ollenkaan	En ollenkaan	Hyvä	Hyvä	Kyllä, varmasti	Kyllä, varmasti	Kyllä	En osaa sanoa	Kyllä	Kyllä	Ei	Ei	Ei	Ei koskaan	Ei koskaan	En osaa sanoa	Harvoin	Aina	Joskus	Usein	Aina	Aina	Aina	En osaa sanoa	Aina	Aina	Aina	Ei koskaan
25-34	Nainen	Toinen aste (Lukio tai ammattikoulu)	2	0	Täysipäiväinen	Suomi	2020	Kanta-Häme	Ei	Erikoissairaanhoidossa (esim. sairaalan neurologian poliklinikka)		MS-tauti hoitotasapainossa, ei juuri toimintakykyhaittaa				2	1	3	0	2	3	En ollenkaan	En ollenkaan	Hyvä	Erinomainen	Kyllä, suurinpiirtein	Kyllä, suurinpiirtein	Kyllä	Kyllä	Kyllä	Kyllä	Ei	Ei	Kyllä	Ei koskaan	Ei koskaan	En osaa sanoa	Harvoin	Aina	Aina	Aina	Aina	Aina	Aina	Aina	Aina	Aina	Aina	Aina
35-44	Nainen	Ylempi korkeakoulututkinto	2	0	Osa-aikainen	Suomi	2012	Varsinais-Suomi	Kyllä	Erikoissairaanhoidossa (esim. sairaalan neurologian poliklinikka)			MS-tauti hoitotasapainossa, arjen toimintakyky alentunut			22	5	3	1	3	5	En ollenkaan	Alle 7 päivää	Tyydyttävä	Hyvä	Kyllä, suurinpiirtein	Kyllä, suurinpiirtein	Kyllä	Ei	Kyllä	Kyllä	Ei	Kyllä	Ei	Harvoin	Ei koskaan	En osaa sanoa	Joskus	Usein	Joskus	Usein	Usein	Joskus	Usein	Joskus	Joskus	Joskus	Joskus	Harvoin
45-54	Nainen	Opistoasteen tutkinto	2	0	Eläkkeellä (ml. työkyvyttömyyseläke)	Suomi	2016	Helsinki (ja HUS)	Ei	Erikoissairaanhoidossa (esim. sairaalan neurologian poliklinikka)			MS-tauti hoitotasapainossa, arjen toimintakyky alentunut			11	0	2	22	2	2	En ollenkaan	En ollenkaan	Hyvä	Hyvä	Kyllä, suurinpiirtein	Kyllä, varmasti	Ei	Ei	Ei	Kyllä	Ei	Kyllä	Ei	Ei koskaan	Ei koskaan	En osaa sanoa	Usein	Joskus	Harvoin	Aina	Joskus	Joskus	Joskus	Ei koskaan	Joskus	Ei koskaan	Joskus	Ei koskaan
35-44	Nainen	Alempi korkeakoulututkinto	2	0	Täysipäiväinen	Suomi	2013	Vantaa-Kerava (ja HUS)	Kyllä	Erikoissairaanhoidossa (esim. sairaalan neurologian poliklinikka)		MS-tauti hoitotasapainossa, ei juuri toimintakykyhaittaa				0	5	3	0	3	2	En ollenkaan	En ollenkaan	Erinomainen	Hyvä	Kyllä, suurinpiirtein	Kyllä, varmasti	Kyllä	Ei	Kyllä	Ei	Kyllä	Ei	Ei	En osaa sanoa	En osaa sanoa	En osaa sanoa	En osaa sanoa	Usein	Ei koskaan	Usein	Usein	Usein	Usein	Ei koskaan	Ei koskaan	Ei koskaan	Harvoin	Ei koskaan
45-54	Nainen	Ylempi korkeakoulututkinto	4	2	Täysipäiväinen	Suomi	2008	Varsinais-Suomi	Ei	Erikoissairaanhoidossa (esim. sairaalan neurologian poliklinikka)		MS-tauti hoitotasapainossa, ei juuri toimintakykyhaittaa				1	0	3	0	1	3	En ollenkaan	En ollenkaan	Hyvä	Hyvä	Kyllä, varmasti	Kyllä, varmasti	Kyllä	Kyllä	Ei	Kyllä	Ei	Ei	Ei	Ei koskaan	Ei koskaan	En osaa sanoa	En osaa sanoa	Aina	Joskus	Aina	Aina	Aina	Aina	Ei koskaan	Aina	Usein	Aina	Usein
55-64	Nainen	Ylempi korkeakoulututkinto	2	0	Täysipäiväinen	Suomi	1994	Keski-Uusimaa (ja HUS)	Kyllä	Perusterveydenhuollossa (esim. terveyskeskus tai - asema)			MS-tauti hoitotasapainossa, arjen toimintakyky alentunut			0	0	2	3	0	2	En ollenkaan	En ollenkaan	Hyvä	Tyydyttävä	En osaa sanoa	Ei	Kyllä	Ei	Ei	Ei	Ei	Ei	Ei	En osaa sanoa	En osaa sanoa	En osaa sanoa	En osaa sanoa	En osaa sanoa	En osaa sanoa	En osaa sanoa	En osaa sanoa	En osaa sanoa	En osaa sanoa	En osaa sanoa	En osaa sanoa	En osaa sanoa	En osaa sanoa	En osaa sanoa
35-44	Nainen	Toinen aste (Lukio tai ammattikoulu)	2	0	Eläkkeellä (ml. työkyvyttömyyseläke)	Suomi	2015	Keski-Uusimaa (ja HUS)	Kyllä	Erikoissairaanhoidossa (esim. sairaalan neurologian poliklinikka)		MS-tauti hoitotasapainossa, ei juuri toimintakykyhaittaa				1	0	8	4	1	8	En ollenkaan	En ollenkaan	Hyvä	Hyvä	En osaa sanoa	Kyllä, suurinpiirtein	Kyllä	Kyllä	Kyllä	Kyllä	Ei	Ei	Ei	Harvoin	Ei koskaan	En osaa sanoa	Joskus	Usein	Harvoin	Aina	Joskus	Joskus	Aina	Usein	Aina	Aina	Usein	Joskus
55-64	Nainen	Toinen aste (Lukio tai ammattikoulu)	2	0	Eläkkeellä (ml. työkyvyttömyyseläke)	Suomi	2003	Lappi	Ei	Erikoissairaanhoidossa (esim. sairaalan neurologian poliklinikka)			MS-tauti hoitotasapainossa, arjen toimintakyky alentunut			10	3	2	0	3	5	En ollenkaan	En ollenkaan	Tyydyttävä	Hyvä	Ei	Kyllä, suurinpiirtein	Kyllä	Kyllä	Kyllä	Kyllä	Ei	Ei	Kyllä	Ei koskaan	Ei koskaan	En osaa sanoa	Usein	Usein	Aina	Aina	Aina	Usein	Aina	Usein	Usein	Aina	Aina	Joskus
35-44	Nainen	Toinen aste (Lukio tai ammattikoulu)	3	1	Eläkkeellä (ml. työkyvyttömyyseläke)	Suomi	2019	Varsinais-Suomi	Kyllä	Erikoissairaanhoidossa (esim. sairaalan neurologian poliklinikka)			MS-tauti hoitotasapainossa, arjen toimintakyky alentunut			45	3	3	2	6	3	En ollenkaan	En ollenkaan	Hyvä	Hyvä	Kyllä, suurinpiirtein	Kyllä, varmasti	Kyllä	Kyllä	Kyllä	Kyllä	Ei	Ei	Ei	Ei koskaan	En osaa sanoa	En osaa sanoa	Usein	Joskus	Joskus	Usein	Usein	Usein	En osaa sanoa	Joskus	Usein	Usein	Usein	Joskus
55-64	Nainen	Toinen aste (Lukio tai ammattikoulu)	2	0	Eläkkeellä (ml. työkyvyttömyyseläke)	Suomi	2019	Pirkanmaa	Ei	Perusterveydenhuollossa (esim. terveyskeskus tai - asema)				MS-tauti ei hoitotasapainossa (esim. pahenemisvaihe)		2	1	0	0	2	2	En ollenkaan	En ollenkaan	Kohtalainen	Tyydyttävä	Kyllä, suurinpiirtein	Kyllä, suurinpiirtein	Kyllä	Ei	Ei	Kyllä	Ei	Kyllä	Ei	Ei koskaan	Ei koskaan	Ei koskaan	Aina	Joskus	Ei koskaan	Usein	Harvoin	Joskus	Harvoin	Ei koskaan	Ei koskaan	Ei koskaan	Harvoin	Ei koskaan
45-54	Nainen	Ylempi korkeakoulututkinto	3	1	Täysipäiväinen	Suomi	2013	Varsinais-Suomi	Ei	Erikoissairaanhoidossa (esim. sairaalan neurologian poliklinikka)		MS-tauti hoitotasapainossa, ei juuri toimintakykyhaittaa				1	1	0	0	1	0	En ollenkaan	En ollenkaan	Hyvä	Hyvä	Kyllä, suurinpiirtein	Kyllä, varmasti	Kyllä	Ei	Kyllä	En osaa sanoa	Ei	Ei	Ei	Ei koskaan	Ei koskaan	Ei koskaan	Harvoin	Usein	Harvoin	Aina	Aina	Aina	Aina	Ei koskaan	Usein	Ei koskaan	En osaa sanoa	Ei koskaan
55-64	Nainen	Ylempi korkeakoulututkinto	2	0	Täysipäiväinen	Suomi	1998	Pirkanmaa	Ei	Erikoissairaanhoidossa (esim. sairaalan neurologian poliklinikka)			MS-tauti hoitotasapainossa, arjen toimintakyky alentunut			40	2	7	5	En osaa sanoa	5	En ollenkaan	Yli 7 päivää	Kohtalainen	Tyydyttävä	Ei	Ei	Kyllä	Ei	Kyllä	Ei	Ei	Kyllä	Ei	Harvoin	Ei koskaan	En osaa sanoa	Ei koskaan	Aina	Harvoin	Usein	Usein	Usein	Usein	Ei koskaan	Usein	Ei koskaan	Ei koskaan	Harvoin
75 tai vanhempi	Mies	Opistoasteen tutkinto	2	0	Eläkkeellä (ml. työkyvyttömyyseläke)	Suomi	1979	Päijät-Häme	Ei	Erikoissairaanhoidossa (esim. sairaalan neurologian poliklinikka)			MS-tauti hoitotasapainossa, arjen toimintakyky alentunut			1	0	0	0	2	0	En ollenkaan	En ollenkaan	Kohtalainen	Hyvä	Kyllä, suurinpiirtein	Kyllä, varmasti	Kyllä	Kyllä	Kyllä	Kyllä	Ei	Ei	Ei	Ei koskaan	Ei koskaan	Ei koskaan	Ei koskaan	Aina	Harvoin	Usein	Aina	Aina	Aina	Joskus	Usein	Usein	Harvoin	Joskus
45-54	Nainen	Opistoasteen tutkinto	1 (Asun yksin)	0	Täysipäiväinen	Suomi	2003	Kanta-Häme	Ei	Erikoissairaanhoidossa (esim. sairaalan neurologian poliklinikka)		MS-tauti hoitotasapainossa, ei juuri toimintakykyhaittaa				1	0	3	2	1	3	En ollenkaan	En ollenkaan	Tyydyttävä	En osaa sanoa	Ei	Ei	Ei	Ei	Ei	Kyllä	Ei	Kyllä	Ei	Ei koskaan	Ei koskaan	En osaa sanoa	Joskus	Usein	Aina	Aina	Aina	Usein	Harvoin	Ei koskaan	En osaa sanoa	Harvoin	Aina	Ei koskaan
35-44	Nainen	Toinen aste (Lukio tai ammattikoulu)	3	2	Eläkkeellä (ml. työkyvyttömyyseläke)	Suomi	2014	Päijät-Häme	Ei	Erikoissairaanhoidossa (esim. sairaalan neurologian poliklinikka)			MS-tauti hoitotasapainossa, arjen toimintakyky alentunut			125	2	0	2	12	2	En ollenkaan	En ollenkaan	Hyvä	Erinomainen	Kyllä, suurinpiirtein	Kyllä, suurinpiirtein	Kyllä	Kyllä	Kyllä	Kyllä	Ei	Ei	Ei	Ei koskaan	Ei koskaan	Ei koskaan	Harvoin	Usein	Joskus	Aina	Usein	Aina	Aina	Joskus	Aina	Aina	Aina	En osaa sanoa
55-64	Nainen	Peruskoulu	2	0	Täysipäiväinen	Suomi	2015	Helsinki (ja HUS)	En osaa sanoa	Erikoissairaanhoidossa (esim. sairaalan neurologian poliklinikka)		MS-tauti hoitotasapainossa, ei juuri toimintakykyhaittaa				1	5	10	10	2	6	En ollenkaan	En ollenkaan	Hyvä	Hyvä	En osaa sanoa	Kyllä, suurinpiirtein	Kyllä	Kyllä	Kyllä	Kyllä	Ei	En osaa sanoa	Ei	Harvoin	En osaa sanoa	En osaa sanoa	Harvoin	Aina	Ei koskaan	Usein	Usein	Aina	Aina	Ei koskaan	Usein	Joskus	Usein	Ei koskaan
45-54	Mies	Peruskoulu	2	0	Eläkkeellä (ml. työkyvyttömyyseläke)	Suomi	2010	Helsinki (ja HUS)	Ei	Erikoissairaanhoidossa (esim. sairaalan neurologian poliklinikka)			MS-tauti hoitotasapainossa, arjen toimintakyky alentunut			1	1	20	5	1	1	En ollenkaan	En ollenkaan	Tyydyttävä	Hyvä	Kyllä, suurinpiirtein	Kyllä, suurinpiirtein	Kyllä	Kyllä	Ei	Ei	Ei	Kyllä	Ei	Joskus	Ei koskaan	En osaa sanoa	Usein	Usein	Harvoin	Usein	Usein	Usein	Usein	Harvoin	Joskus	Usein	Usein	Ei koskaan
45-54	Nainen	Opistoasteen tutkinto	1 (Asun yksin)	0	Eläkkeellä (ml. työkyvyttömyyseläke)	Suomi	2010	Pohjois-Savo	Ei	En osaa sanoa			MS-tauti hoitotasapainossa, arjen toimintakyky alentunut	MS-tauti ei hoitotasapainossa (esim. pahenemisvaihe)		0	0	0	0	0	0	En ollenkaan	En ollenkaan	Kohtalainen	Huono	En osaa sanoa	En osaa sanoa	Ei	Ei	Ei	Ei	En osaa sanoa	Kyllä	Ei	En osaa sanoa	En osaa sanoa	En osaa sanoa	En osaa sanoa	En osaa sanoa	En osaa sanoa	En osaa sanoa	En osaa sanoa	En osaa sanoa	En osaa sanoa	En osaa sanoa	En osaa sanoa	En osaa sanoa	En osaa sanoa	En osaa sanoa
65-74	Nainen	Toinen aste (Lukio tai ammattikoulu)	2	0	Eläkkeellä (ml. työkyvyttömyyseläke)	Suomi	1997	Helsinki (ja HUS)	Ei	Perusterveydenhuollossa (esim. terveyskeskus tai - asema)			MS-tauti hoitotasapainossa, arjen toimintakyky alentunut			0	0	2	2	0	2	En ollenkaan	En ollenkaan	Kohtalainen	Tyydyttävä	Ei	Kyllä, suurinpiirtein	Ei	Kyllä	Ei	Ei	Kyllä	Kyllä	Ei	Ei koskaan	Ei koskaan	Aina	Usein	Ei koskaan	Ei koskaan	Usein	Harvoin	Harvoin	Ei koskaan	Ei koskaan	Joskus	Ei koskaan	Ei koskaan	Ei koskaan
35-44	Nainen	Ylempi korkeakoulututkinto	4	2	Täysipäiväinen	Suomi	2023	Keski-Uusimaa (ja HUS)	Ei	Erikoissairaanhoidossa (esim. sairaalan neurologian poliklinikka)	Uusi MS-tauti diagnoosi		MS-tauti hoitotasapainossa, arjen toimintakyky alentunut			10	1	4	3	20	4	Alle 7 päivää	En ollenkaan	Hyvä	Erinomainen	Kyllä, varmasti	Kyllä, varmasti	Kyllä	Kyllä	Kyllä	Kyllä	Ei	Kyllä	Ei	Harvoin	Ei koskaan	En osaa sanoa	Aina	Ei koskaan	Usein	Aina	Usein	Usein	Aina	Joskus	Joskus	Harvoin	Harvoin	Joskus
55-64	Nainen	Toinen aste (Lukio tai ammattikoulu)	2	0	Eläkkeellä (ml. työkyvyttömyyseläke)	Suomi	2013	Pohjois-Pohjanmaa	Ei	En osaa sanoa				MS-tauti ei hoitotasapainossa (esim. pahenemisvaihe)		0	0	4	2	0	4	En ollenkaan	En ollenkaan	Kohtalainen	Huono	Ei	En osaa sanoa	Kyllä	Kyllä	Ei	En osaa sanoa	Ei	Kyllä	Ei	Ei koskaan	Ei koskaan	En osaa sanoa	Harvoin	Usein	Harvoin	Usein	Usein	Usein	Harvoin	Ei koskaan	Harvoin	Usein	En osaa sanoa	En osaa sanoa
35-44	Mies	Alempi korkeakoulututkinto	4	3	Täysipäiväinen	Suomi	2007	Vantaa-Kerava (ja HUS)	Ei	Erikoissairaanhoidossa (esim. sairaalan neurologian poliklinikka)		MS-tauti hoitotasapainossa, ei juuri toimintakykyhaittaa				1	0	2	2	1	4	En ollenkaan	En ollenkaan	Hyvä	Erinomainen	Kyllä, suurinpiirtein	Ei	Kyllä	Kyllä	Ei	Kyllä	Ei	Kyllä	Ei	Ei koskaan	Ei koskaan	En osaa sanoa	Joskus	Usein	Usein	Usein	Aina	Aina	Aina	Harvoin	Joskus	Usein	Aina	Ei koskaan
65-74	Nainen	Alempi korkeakoulututkinto	1 (Asun yksin)	0	Eläkkeellä (ml. työkyvyttömyyseläke)	Suomi	1997	Varsinais-Suomi	Ei	Perusterveydenhuollossa (esim. terveyskeskus tai - asema)			MS-tauti hoitotasapainossa, arjen toimintakyky alentunut			0	0	1	2	0	1	En ollenkaan	En ollenkaan	Kohtalainen	En osaa sanoa	En osaa sanoa	Kyllä, suurinpiirtein	Ei	Ei	Ei	Kyllä	Ei	Ei	Ei	Ei koskaan	Ei koskaan	En osaa sanoa	Usein	Joskus	En osaa sanoa	Joskus	Joskus	Joskus	Harvoin	En osaa sanoa	En osaa sanoa	En osaa sanoa	En osaa sanoa	En osaa sanoa
35-44	Mies	Ylempi korkeakoulututkinto	2	1	Eläkkeellä (ml. työkyvyttömyyseläke)	Suomi	2003	Satakunta	Ei	Erikoissairaanhoidossa (esim. sairaalan neurologian poliklinikka)			MS-tauti hoitotasapainossa, arjen toimintakyky alentunut			70	0	2	0	4	2	En ollenkaan	En ollenkaan	Huono	Erinomainen	Kyllä, varmasti	Kyllä, varmasti	Kyllä	Kyllä	Kyllä	Kyllä	Ei	Kyllä	Kyllä	Ei koskaan	Harvoin	Aina	Joskus	Aina	Aina	Aina	Aina	Aina	Aina	Usein	Aina	Joskus	Aina	Usein
25-34	Nainen	Alempi korkeakoulututkinto	3	1	Osa-aikainen	Muu	2023	Varsinais-Suomi	Kyllä	Erikoissairaanhoidossa (esim. sairaalan neurologian poliklinikka)	Uusi MS-tauti diagnoosi		MS-tauti hoitotasapainossa, arjen toimintakyky alentunut			10	0	3	2	4	2	En ollenkaan	En ollenkaan	Kohtalainen	Hyvä	Kyllä, varmasti	Kyllä, varmasti	Kyllä	Kyllä	Kyllä	Kyllä	Kyllä	Kyllä	Ei	Joskus	Ei koskaan	En osaa sanoa	Usein	Joskus	Ei koskaan	Joskus	Harvoin	Harvoin	Ei koskaan	Ei koskaan	Ei koskaan	Ei koskaan	Joskus	Joskus
35-44	Mies	Toinen aste (Lukio tai ammattikoulu)	4	1	Muu	Suomi	2018	Varsinais-Suomi	Ei	Erikoissairaanhoidossa (esim. sairaalan neurologian poliklinikka)			MS-tauti hoitotasapainossa, arjen toimintakyky alentunut			15	0	4	0	3	2	En ollenkaan	En ollenkaan	Kohtalainen	Hyvä	En osaa sanoa	En osaa sanoa	Kyllä	Kyllä	Ei	Kyllä	Ei	Ei	Ei	Ei koskaan	Ei koskaan	En osaa sanoa	Joskus	Usein	Aina	Usein	Aina	Aina	Aina	Joskus	Usein	Joskus	En osaa sanoa	Joskus
45-54	Nainen	Toinen aste (Lukio tai ammattikoulu)	2	0	Eläkkeellä (ml. työkyvyttömyyseläke)	Suomi	2001	Lappi	Kyllä	Erikoissairaanhoidossa (esim. sairaalan neurologian poliklinikka)				MS-tauti ei hoitotasapainossa (esim. pahenemisvaihe)		90	6	50	1	1	2	Alle 7 päivää	En ollenkaan	Tyydyttävä	Hyvä	Kyllä, varmasti	Kyllä, varmasti	Kyllä	Kyllä	Kyllä	Kyllä	Kyllä	Kyllä	Ei	Ei koskaan	Ei koskaan	Aina	Usein	Usein	Usein	Usein	Usein	Usein	Joskus	Ei koskaan	Joskus	Usein	Usein	Ei koskaan
55-64	Mies	Toinen aste (Lukio tai ammattikoulu)	1 (Asun yksin)	0	Eläkkeellä (ml. työkyvyttömyyseläke)	Suomi	2006	Varsinais-Suomi	Ei	Erikoissairaanhoidossa (esim. sairaalan neurologian poliklinikka)			MS-tauti hoitotasapainossa, arjen toimintakyky alentunut			80	0	0	0	3	0	En ollenkaan	En ollenkaan	Kohtalainen	Hyvä	Kyllä, varmasti	Kyllä, varmasti	Kyllä	Kyllä	En osaa sanoa	Kyllä	Ei	Ei	En osaa sanoa	Harvoin	Harvoin	En osaa sanoa	Joskus	Usein	En osaa sanoa	Usein	Aina	Aina	Aina	Usein	Aina	Aina	Usein	Joskus
45-54	Nainen	Opistoasteen tutkinto	2	0	Eläkkeellä (ml. työkyvyttömyyseläke)	Suomi	1990	Pirkanmaa	Kyllä	Perusterveydenhuollossa (esim. terveyskeskus tai - asema)			MS-tauti hoitotasapainossa, arjen toimintakyky alentunut			1	0	1	0	2	2	En ollenkaan	En ollenkaan	Tyydyttävä	Hyvä	Kyllä, varmasti	Kyllä, suurinpiirtein	Ei	Ei	Kyllä	Kyllä	Ei	Ei	Kyllä	Joskus	Harvoin	Aina	Usein	Joskus	Joskus	Usein	Joskus	Joskus	Joskus	Ei koskaan	Usein	Harvoin	Usein	Usein
35-44	Nainen	Alempi korkeakoulututkinto	2	0	Osa-aikainen	Suomi	2011	Pirkanmaa	Kyllä	Erikoissairaanhoidossa (esim. sairaalan neurologian poliklinikka)		MS-tauti hoitotasapainossa, ei juuri toimintakykyhaittaa				1	0	12	0	2	4	En ollenkaan	En ollenkaan	Hyvä	Hyvä	Ei	Kyllä, varmasti	Kyllä	Ei	Ei	Kyllä	Ei	En osaa sanoa	Ei	Ei koskaan	Ei koskaan	En osaa sanoa	Ei koskaan	Aina	Joskus	Aina	Aina	Aina	Aina	Ei koskaan	Usein	Joskus	Aina	Ei koskaan
45-54	Nainen	Alempi korkeakoulututkinto	2	0	Eläkkeellä (ml. työkyvyttömyyseläke)	Suomi	2015	Etelä-Savo	Kyllä	Erikoissairaanhoidossa (esim. sairaalan neurologian poliklinikka)			MS-tauti hoitotasapainossa, arjen toimintakyky alentunut			2	1	3	8	2	10	En ollenkaan	En ollenkaan	Hyvä	Hyvä	Ei	Kyllä, varmasti	Kyllä	Kyllä	Kyllä	Kyllä	Kyllä	Kyllä	Kyllä	Joskus	Ei koskaan	En osaa sanoa	Aina	Joskus	Joskus	Usein	Usein	Aina	Joskus	Harvoin	Usein	Joskus	Usein	Ei koskaan
35-44	Nainen	Alempi korkeakoulututkinto	4	2	Täysipäiväinen	Suomi	2019	Länsi-Uusimaa (ja HUS)	Ei	Erikoissairaanhoidossa (esim. sairaalan neurologian poliklinikka)		MS-tauti hoitotasapainossa, ei juuri toimintakykyhaittaa				12	0	1	0	2	1	En ollenkaan	En ollenkaan	Hyvä	Hyvä	Kyllä, suurinpiirtein	Kyllä, suurinpiirtein	Kyllä	Kyllä	Kyllä	Kyllä	Ei	Kyllä	Ei	Ei koskaan	Ei koskaan	En osaa sanoa	Usein	Usein	Harvoin	Usein	Usein	Aina	Aina	Ei koskaan	Usein	Ei koskaan	Aina	Ei koskaan
45-54	Nainen	Ylempi korkeakoulututkinto	3	1	Muu	Suomi	2007	Keski-Uusimaa (ja HUS)	Ei	Erikoissairaanhoidossa (esim. sairaalan neurologian poliklinikka)			MS-tauti hoitotasapainossa, arjen toimintakyky alentunut			2	0	0	0	2	0	En ollenkaan	En ollenkaan	Hyvä	Kohtalainen	En osaa sanoa	En osaa sanoa	Kyllä	Ei	Kyllä	En osaa sanoa	Kyllä	Ei	Ei	Ei koskaan	Ei koskaan	En osaa sanoa	Usein	Joskus	Joskus	Joskus	Joskus	Joskus	Usein	Ei koskaan	Harvoin	Ei koskaan	Usein	Ei koskaan
45-54	Nainen	Alempi korkeakoulututkinto	2	0	Täysipäiväinen	Suomi	2020	Pohjois-Pohjanmaa	Ei	Erikoissairaanhoidossa (esim. sairaalan neurologian poliklinikka)		MS-tauti hoitotasapainossa, ei juuri toimintakykyhaittaa				0	0	1	1	0	0	En ollenkaan	En ollenkaan	Erinomainen	En osaa sanoa	Kyllä, suurinpiirtein	Kyllä, varmasti	Kyllä	Ei	Ei	En osaa sanoa	Ei	Ei	Ei	Ei koskaan	En osaa sanoa	En osaa sanoa	En osaa sanoa	En osaa sanoa	En osaa sanoa	En osaa sanoa	En osaa sanoa	En osaa sanoa	En osaa sanoa	En osaa sanoa	En osaa sanoa	En osaa sanoa	En osaa sanoa	En osaa sanoa
35-44	Nainen	Toinen aste (Lukio tai ammattikoulu)	5 tai enemmän	4 tai enemmän	Eläkkeellä (ml. työkyvyttömyyseläke)	Suomi	2003	Lappi	Kyllä	Erikoissairaanhoidossa (esim. sairaalan neurologian poliklinikka)			MS-tauti hoitotasapainossa, arjen toimintakyky alentunut			3	1	6	3	10	9	Alle 7 päivää	Alle 7 päivää	Kohtalainen	Huono	Ei	En osaa sanoa	Kyllä	Kyllä	Ei	Kyllä	Ei	Kyllä	Ei	Harvoin	Harvoin	Aina	Usein	Harvoin	Joskus	Usein	Joskus	Aina	Harvoin	Ei koskaan	Ei koskaan	Ei koskaan	Ei koskaan	Ei koskaan
35-44	Nainen	Toinen aste (Lukio tai ammattikoulu)	2	0	Täysipäiväinen	Suomi	2020	Pirkanmaa	Ei	Erikoissairaanhoidossa (esim. sairaalan neurologian poliklinikka)			MS-tauti hoitotasapainossa, arjen toimintakyky alentunut			3	0	3	0	3	3	En ollenkaan	En ollenkaan	Tyydyttävä	Hyvä	Kyllä, suurinpiirtein	Ei	Kyllä	Kyllä	Kyllä	En osaa sanoa	Ei	Kyllä	Ei	Ei koskaan	Ei koskaan	Ei koskaan	Ei koskaan	Aina	Aina	Usein	Usein	Usein	Usein	En osaa sanoa	En osaa sanoa	En osaa sanoa	En osaa sanoa	Ei koskaan
55-64	Mies	Alempi korkeakoulututkinto	2	0	Eläkkeellä (ml. työkyvyttömyyseläke)	Suomi	2010	Kainuu	Kyllä	Erikoissairaanhoidossa (esim. sairaalan neurologian poliklinikka)		MS-tauti hoitotasapainossa, ei juuri toimintakykyhaittaa				2	1	15	5	2	4	En ollenkaan	Yli 7 päivää	Hyvä	Hyvä	Kyllä, suurinpiirtein	Ei	Kyllä	Kyllä	Kyllä	Kyllä	Ei	Kyllä	Kyllä	Ei koskaan	Ei koskaan	Ei koskaan	Harvoin	Aina	Joskus	Aina	Aina	Aina	Aina	Aina	Usein	Aina	Usein	Aina
25-34	Nainen	Toinen aste (Lukio tai ammattikoulu)	2	0	Täysipäiväinen	Suomi	2022	Pirkanmaa	Ei	Erikoissairaanhoidossa (esim. sairaalan neurologian poliklinikka)				MS-tauti ei hoitotasapainossa (esim. pahenemisvaihe)		2	3	1	2	2-3	2	En ollenkaan	En ollenkaan	Kohtalainen	Tyydyttävä	En osaa sanoa	Ei	En osaa sanoa	Kyllä	Ei	Kyllä	Ei	Kyllä	Ei	Ei koskaan	Ei koskaan	En osaa sanoa	Usein	Joskus	Harvoin	Usein	Usein	Usein	Harvoin	Ei koskaan	Joskus	Harvoin	En osaa sanoa	Ei koskaan
35-44	Nainen	Ylempi korkeakoulututkinto	2	0	Täysipäiväinen	Suomi	2015	Helsinki (ja HUS)	Kyllä	Erikoissairaanhoidossa (esim. sairaalan neurologian poliklinikka)		MS-tauti hoitotasapainossa, ei juuri toimintakykyhaittaa				1	0	5	5	1	1	En ollenkaan	En ollenkaan	Erinomainen	Erinomainen	Kyllä, suurinpiirtein	Kyllä, varmasti	Kyllä	Kyllä	Kyllä	Kyllä	Ei	Ei	Ei	Harvoin	Ei koskaan	Ei koskaan	Joskus	Aina	Aina	Aina	Aina	Aina	Aina	En osaa sanoa	Aina	Aina	Aina	En osaa sanoa
25-34	Nainen	Alempi korkeakoulututkinto	2	0	Täysipäiväinen	Suomi	2022	Lappi	Ei	Erikoissairaanhoidossa (esim. sairaalan neurologian poliklinikka)			MS-tauti hoitotasapainossa, arjen toimintakyky alentunut			7	1	1	0	3	1	En ollenkaan	Yli 7 päivää	Kohtalainen	Hyvä	En osaa sanoa	En osaa sanoa	Kyllä	Kyllä	Kyllä	Kyllä	En osaa sanoa	Kyllä	Kyllä	Harvoin	Ei koskaan	En osaa sanoa	Usein	Usein	Usein	Joskus	Usein	Usein	Usein	Ei koskaan	Usein	Usein	Usein	Ei koskaan
35-44	Nainen	Alempi korkeakoulututkinto	2	0	Eläkkeellä (ml. työkyvyttömyyseläke)	Suomi	2021	Keski-Suomi	Kyllä	Erikoissairaanhoidossa (esim. sairaalan neurologian poliklinikka)			MS-tauti hoitotasapainossa, arjen toimintakyky alentunut			3	2	2	0	3	2	Alle 7 päivää	Alle 7 päivää	Tyydyttävä	Hyvä	En osaa sanoa	Kyllä, suurinpiirtein	En osaa sanoa	En osaa sanoa	Ei	Kyllä	Kyllä	Kyllä	Ei	Ei koskaan	En osaa sanoa	En osaa sanoa	Aina	Joskus	Joskus	Harvoin	Joskus	Joskus	Joskus	Ei koskaan	Joskus	Ei koskaan	En osaa sanoa	Ei koskaan
45-54	Nainen	Opistoasteen tutkinto	2	0	Eläkkeellä (ml. työkyvyttömyyseläke)	Suomi	1998	Varsinais-Suomi	Ei	Erikoissairaanhoidossa (esim. sairaalan neurologian poliklinikka)			MS-tauti hoitotasapainossa, arjen toimintakyky alentunut			50	0	0	0	2	0	En ollenkaan	En ollenkaan	Kohtalainen	Hyvä	Kyllä, suurinpiirtein	Ei	Ei	Ei	Ei	Kyllä	Ei	Ei	Kyllä	Harvoin	En osaa sanoa	En osaa sanoa	Usein	Joskus	Harvoin	Harvoin	Joskus	Joskus	Usein	Ei koskaan	Joskus	Harvoin	Joskus	Harvoin
25-34	Nainen	Toinen aste (Lukio tai ammattikoulu)	4	2	Täysipäiväinen	Suomi	2023	Pirkanmaa	Ei	Erikoissairaanhoidossa (esim. sairaalan neurologian poliklinikka)	Uusi MS-tauti diagnoosi			MS-tauti ei hoitotasapainossa (esim. pahenemisvaihe)		9	5	2	2	2	2	Alle 7 päivää	En ollenkaan	Hyvä	Hyvä	Kyllä, suurinpiirtein	Kyllä, varmasti	Kyllä	Kyllä	Kyllä	Kyllä	Kyllä	Kyllä	Kyllä	Ei koskaan	Ei koskaan	En osaa sanoa	Joskus	Usein	Usein	Usein	Joskus	Joskus	Usein	Ei koskaan	En osaa sanoa	En osaa sanoa	En osaa sanoa	Joskus
55-64	Nainen	Alempi korkeakoulututkinto	1 (Asun yksin)	0	Eläkkeellä (ml. työkyvyttömyyseläke)	Suomi	1982	Itä-Uusimaa (ja HUS)	Kyllä	En osaa sanoa				MS-tauti ei hoitotasapainossa (esim. pahenemisvaihe)		0	0	2	0	0	2	En ollenkaan	En ollenkaan	Huono	En osaa sanoa	Ei	Ei	Ei	Ei	Ei	Ei	Kyllä	Kyllä	Ei	En osaa sanoa	Ei koskaan	En osaa sanoa	Aina	Ei koskaan	Ei koskaan	Ei koskaan	Ei koskaan	Harvoin	Harvoin	Ei koskaan	Harvoin	Ei koskaan	Harvoin	Ei koskaan
55-64	Nainen	Toinen aste (Lukio tai ammattikoulu)	2	0	Eläkkeellä (ml. työkyvyttömyyseläke)	Suomi	2008	Pohjanmaa	Ei	Erikoissairaanhoidossa (esim. sairaalan neurologian poliklinikka)			MS-tauti hoitotasapainossa, arjen toimintakyky alentunut			0	0	0	0	0	0	En ollenkaan	Yli 7 päivää	Kohtalainen	Huono	Kyllä, suurinpiirtein	Kyllä, suurinpiirtein	Ei	Ei	Kyllä	Ei	Ei	Kyllä	Kyllä	Ei koskaan	Ei koskaan	En osaa sanoa	Aina	Aina	Aina	Aina	Aina	Aina	Aina	Aina	Aina	Aina	Aina	Aina
55-64	Nainen	Opistoasteen tutkinto	2	0	Täysipäiväinen	Suomi	2000	Lappi	Kyllä	Erikoissairaanhoidossa (esim. sairaalan neurologian poliklinikka)		MS-tauti hoitotasapainossa, ei juuri toimintakykyhaittaa				3	0	3	1	3	3	Alle 7 päivää	En ollenkaan	Hyvä	Erinomainen	Kyllä, suurinpiirtein	Kyllä, suurinpiirtein	Kyllä	Kyllä	Kyllä	Kyllä	Ei	Ei	Ei	Ei koskaan	Ei koskaan	Ei koskaan	Joskus	Aina	Aina	Aina	Aina	Aina	Aina	Joskus	Aina	Aina	Aina	En osaa sanoa
35-44	Nainen	Ylempi korkeakoulututkinto	4	2	Eläkkeellä (ml. työkyvyttömyyseläke)	Suomi	2003	Etelä-Karjala	Ei	Erikoissairaanhoidossa (esim. sairaalan neurologian poliklinikka)		MS-tauti hoitotasapainossa, ei juuri toimintakykyhaittaa				1	0	2	0	2	2	En ollenkaan	Yli 7 päivää	Hyvä	Hyvä	Kyllä, suurinpiirtein	Kyllä, suurinpiirtein	Kyllä	Kyllä	Kyllä	Kyllä	Ei	Ei	Kyllä	Ei koskaan	Ei koskaan	Ei koskaan	Joskus	Aina	Usein	Aina	Aina	Aina	Usein	Aina	Aina	Aina	Aina	Aina
35-44	Mies	Toinen aste (Lukio tai ammattikoulu)	2	0	Eläkkeellä (ml. työkyvyttömyyseläke)	Suomi	2011	Keski-Uusimaa (ja HUS)	Ei	Erikoissairaanhoidossa (esim. sairaalan neurologian poliklinikka)		MS-tauti hoitotasapainossa, ei juuri toimintakykyhaittaa				2	2	1	2	0	0	En ollenkaan	En ollenkaan	Hyvä	Hyvä	Kyllä, suurinpiirtein	Kyllä, suurinpiirtein	Kyllä	Kyllä	Kyllä	Kyllä	Ei	Kyllä	Ei	Joskus	Ei koskaan	Ei koskaan	Usein	Usein	Usein	Aina	Usein	Usein	Aina	Usein	Usein	Usein	Usein	Harvoin
25-34	Nainen	Peruskoulu	5 tai enemmän	4 tai enemmän	Eläkkeellä (ml. työkyvyttömyyseläke)	Suomi	2023	Varsinais-Suomi	Kyllä	Erikoissairaanhoidossa (esim. sairaalan neurologian poliklinikka)	Uusi MS-tauti diagnoosi			MS-tauti ei hoitotasapainossa (esim. pahenemisvaihe)		40	15	10	5	15	8	En ollenkaan	En ollenkaan	Huono	Kohtalainen	Kyllä, varmasti	Kyllä, varmasti	Kyllä	Ei	Kyllä	Kyllä	Kyllä	Kyllä	Ei	Harvoin	Ei koskaan	En osaa sanoa	Aina	Joskus	Usein	Joskus	Joskus	Joskus	Usein	Ei koskaan	Joskus	Harvoin	Harvoin	Joskus
25-34	Nainen	Alempi korkeakoulututkinto	5 tai enemmän	3	Täysipäiväinen	Suomi	2022	Pirkanmaa	Ei	Erikoissairaanhoidossa (esim. sairaalan neurologian poliklinikka)		MS-tauti hoitotasapainossa, ei juuri toimintakykyhaittaa				3	1	4	2	3	2	En ollenkaan	En ollenkaan	Hyvä	Hyvä	Kyllä, suurinpiirtein	Kyllä, suurinpiirtein	Kyllä	Ei	Kyllä	Kyllä	Kyllä	Ei	Kyllä	Ei koskaan	Ei koskaan	En osaa sanoa	Joskus	En osaa sanoa	Joskus	Usein	Usein	Joskus	Usein	Joskus	Usein	Joskus	Harvoin	Harvoin
45-54	Mies	Toinen aste (Lukio tai ammattikoulu)	2	0	Eläkkeellä (ml. työkyvyttömyyseläke)	Suomi	1997	Varsinais-Suomi	Ei	Erikoissairaanhoidossa (esim. sairaalan neurologian poliklinikka)			MS-tauti hoitotasapainossa, arjen toimintakyky alentunut			50	2	4	0	5	2	En ollenkaan	En ollenkaan	Tyydyttävä	Hyvä	Kyllä, suurinpiirtein	Kyllä, suurinpiirtein	Kyllä	Kyllä	Kyllä	Kyllä	Ei	Kyllä	Ei	Harvoin	Ei koskaan	En osaa sanoa	Usein	Usein	Joskus	Usein	Usein	Usein	Usein	Joskus	Usein	Joskus	Joskus	Joskus
55-64	Nainen	Ylempi korkeakoulututkinto	1 (Asun yksin)	0	Eläkkeellä (ml. työkyvyttömyyseläke)	Suomi	2000	Varsinais-Suomi	En osaa sanoa	Erikoissairaanhoidossa (esim. sairaalan neurologian poliklinikka)			MS-tauti hoitotasapainossa, arjen toimintakyky alentunut			1	0	5	0	2	2	En ollenkaan	En ollenkaan	Tyydyttävä	Hyvä	En osaa sanoa	Ei	Kyllä	Kyllä	Ei	En osaa sanoa	Ei	Kyllä	Ei	En osaa sanoa	Ei koskaan	En osaa sanoa	Aina	Usein	Harvoin	Joskus	Usein	Usein	Usein	Ei koskaan	Harvoin	Harvoin	En osaa sanoa	Ei koskaan
55-64	Mies	Tutkijakoulutus	2	0	Eläkkeellä (ml. työkyvyttömyyseläke)	Suomi	1989	Etelä-Karjala	Ei	Erikoissairaanhoidossa (esim. sairaalan neurologian poliklinikka)		MS-tauti hoitotasapainossa, ei juuri toimintakykyhaittaa				1	1	1	1	8	2	En ollenkaan	Yli 7 päivää	Tyydyttävä	Erinomainen	Kyllä, suurinpiirtein	Kyllä, suurinpiirtein	Kyllä	Kyllä	Kyllä	Kyllä	Ei	Ei	Kyllä	Ei koskaan	Ei koskaan	Ei koskaan	Ei koskaan	Aina	Aina	Aina	Aina	Aina	Aina	Aina	Aina	Aina	Usein	Usein
55-64	Nainen	Toinen aste (Lukio tai ammattikoulu)	1 (Asun yksin)	0	Eläkkeellä (ml. työkyvyttömyyseläke)	Suomi	2019	Kanta-Häme	Ei	Erikoissairaanhoidossa (esim. sairaalan neurologian poliklinikka)			MS-tauti hoitotasapainossa, arjen toimintakyky alentunut			43	0	5	0	4	2	En ollenkaan	Yli 7 päivää	Tyydyttävä	Hyvä	En osaa sanoa	En osaa sanoa	Kyllä	Ei	Ei	Kyllä	Ei	Ei	Ei	Ei koskaan	En osaa sanoa	En osaa sanoa	En osaa sanoa	Aina	Joskus	Usein	Aina	Aina	Harvoin	Ei koskaan	En osaa sanoa	En osaa sanoa	Usein	Ei koskaan
25-34	Nainen	Alempi korkeakoulututkinto	4	2	Opiskelija	Suomi	2016	Keski-Pohjanmaa	Kyllä	Erikoissairaanhoidossa (esim. sairaalan neurologian poliklinikka)		MS-tauti hoitotasapainossa, ei juuri toimintakykyhaittaa				15	2	4	1	2	2	En ollenkaan	Yli 7 päivää	Hyvä	Erinomainen	En osaa sanoa	En osaa sanoa	Kyllä	Kyllä	Kyllä	Kyllä	Ei	Kyllä	Kyllä	Harvoin	Ei koskaan	En osaa sanoa	Joskus	Usein	Aina	Aina	Aina	Aina	Aina	Joskus	Aina	Usein	Aina	Aina
65-74	Nainen	Toinen aste (Lukio tai ammattikoulu)	2	0	Eläkkeellä (ml. työkyvyttömyyseläke)	Suomi	2016	Varsinais-Suomi	Ei	Erikoissairaanhoidossa (esim. sairaalan neurologian poliklinikka)			MS-tauti hoitotasapainossa, arjen toimintakyky alentunut			1	0	0	0	0	0	En ollenkaan	En ollenkaan	Hyvä	Hyvä	Kyllä, suurinpiirtein	Kyllä, suurinpiirtein	Kyllä	Kyllä	Kyllä	Kyllä	Ei	Ei	Ei	Ei koskaan	Ei koskaan	En osaa sanoa	Harvoin	Aina	Usein	Aina	Aina	Aina	Aina	Joskus	Aina	Aina	Aina	Usein
35-44	Nainen	Alempi korkeakoulututkinto	5 tai enemmän	4 tai enemmän	Osa-aikainen	Ruotsi	2007	Pohjanmaa	Kyllä	Erikoissairaanhoidossa (esim. sairaalan neurologian poliklinikka)			MS-tauti hoitotasapainossa, arjen toimintakyky alentunut			1	2	10	6	2	15	En ollenkaan	En ollenkaan	Tyydyttävä	Huono	Ei	Ei	Kyllä	Ei	Kyllä	Kyllä	Kyllä	Kyllä	Ei	Ei koskaan	Ei koskaan	En osaa sanoa	Usein	Joskus	Ei koskaan	Harvoin	Joskus	Joskus	Joskus	Ei koskaan	Joskus	Harvoin	Harvoin	Ei koskaan
35-44	Mies	Ylempi korkeakoulututkinto	4	2	Osa-aikainen	Suomi	2013	Pirkanmaa	Kyllä	Erikoissairaanhoidossa (esim. sairaalan neurologian poliklinikka)			MS-tauti hoitotasapainossa, arjen toimintakyky alentunut			10	0	5	5	5	8	En ollenkaan	En ollenkaan	Huono	Huono	Ei	Ei	En osaa sanoa	Ei	Ei	Ei	Kyllä	Kyllä	Ei	Harvoin	Ei koskaan	En osaa sanoa	Aina	Ei koskaan	Ei koskaan	Ei koskaan	Harvoin	Ei koskaan	Joskus	Ei koskaan	Harvoin	Ei koskaan	Ei koskaan	Ei koskaan
55-64	Mies	Opistoasteen tutkinto	2	0	Täysipäiväinen	Suomi	1999	Keski-Suomi	Ei	Perusterveydenhuollossa (esim. terveyskeskus tai - asema)		MS-tauti hoitotasapainossa, ei juuri toimintakykyhaittaa				0	0	4	2	0	0	En ollenkaan	En ollenkaan	Tyydyttävä	Hyvä	Kyllä, suurinpiirtein	Kyllä, suurinpiirtein	Kyllä	Kyllä	Ei	Kyllä	Ei	Ei	Ei	Ei koskaan	Ei koskaan	Ei koskaan	Ei koskaan	Aina	Aina	Aina	Aina	Aina	Usein	Joskus	Aina	Usein	Aina	Joskus
25-34	Nainen	Ylempi korkeakoulututkinto	3	1	Muu	Suomi	2010	Pirkanmaa	Kyllä	Erikoissairaanhoidossa (esim. sairaalan neurologian poliklinikka)		MS-tauti hoitotasapainossa, ei juuri toimintakykyhaittaa	MS-tauti hoitotasapainossa, arjen toimintakyky alentunut	MS-tauti ei hoitotasapainossa (esim. pahenemisvaihe)		3	4	2	1	2	2	En ollenkaan	En ollenkaan	Hyvä	Kohtalainen	Ei	En osaa sanoa	Kyllä	En osaa sanoa	Kyllä	Kyllä	Kyllä	Kyllä	Ei	Harvoin	Ei koskaan	En osaa sanoa	Joskus	Usein	Usein	Joskus	Joskus	Usein	Joskus	Harvoin	Joskus	Harvoin	Joskus	Ei koskaan
65-74	Nainen	Opistoasteen tutkinto	2	0	Eläkkeellä (ml. työkyvyttömyyseläke)	Ruotsi	2006	Länsi-Uusimaa (ja HUS)	Ei	Yksityisellä poliklinikalla (esim. yksityinen neurologi)			MS-tauti hoitotasapainossa, arjen toimintakyky alentunut			30	0	1	1	—	1	En ollenkaan	Yli 7 päivää	Kohtalainen	En osaa sanoa	En osaa sanoa	En osaa sanoa	Ei	Ei	Ei	Kyllä	En osaa sanoa	Ei	Ei	En osaa sanoa	Ei koskaan	En osaa sanoa	Joskus	Aina	Ei koskaan	Aina	Usein	Aina	Aina	Ei koskaan	En osaa sanoa	Ei koskaan	En osaa sanoa	Ei koskaan
55-64	Nainen	Ylempi korkeakoulututkinto	2	1	Eläkkeellä (ml. työkyvyttömyyseläke)	Suomi	2000	Päijät-Häme	Kyllä	Erikoissairaanhoidossa (esim. sairaalan neurologian poliklinikka)			MS-tauti hoitotasapainossa, arjen toimintakyky alentunut			0	1	3	3	1	6	En ollenkaan	En ollenkaan	Tyydyttävä	Tyydyttävä	Ei	Ei	En osaa sanoa	Ei	Kyllä	En osaa sanoa	Ei	Ei	En osaa sanoa	Ei koskaan	Ei koskaan	En osaa sanoa	En osaa sanoa	Aina	Harvoin	Joskus	Harvoin	En osaa sanoa	En osaa sanoa	Ei koskaan	En osaa sanoa	Ei koskaan	En osaa sanoa	Ei koskaan
45-54	Nainen	Toinen aste (Lukio tai ammattikoulu)	2	0	Täysipäiväinen	Suomi	2002	Varsinais-Suomi	Ei	Erikoissairaanhoidossa (esim. sairaalan neurologian poliklinikka)		MS-tauti hoitotasapainossa, ei juuri toimintakykyhaittaa				1	1	7	3	1	10	En ollenkaan	En ollenkaan	Tyydyttävä	Tyydyttävä	En osaa sanoa	En osaa sanoa	Kyllä	Kyllä	Ei	Ei	Kyllä	Kyllä	Ei	Ei koskaan	Ei koskaan	En osaa sanoa	Usein	Joskus	Joskus	Usein	Usein	En osaa sanoa	Usein	Ei koskaan	En osaa sanoa	En osaa sanoa	Usein	Ei koskaan
55-64	Nainen	Ylempi korkeakoulututkinto	2	0	Eläkkeellä (ml. työkyvyttömyyseläke)	Suomi	1990	Päijät-Häme	Ei	Erikoissairaanhoidossa (esim. sairaalan neurologian poliklinikka)			MS-tauti hoitotasapainossa, arjen toimintakyky alentunut			51	0	51	0	2	2	En ollenkaan	Yli 7 päivää	Tyydyttävä	Hyvä	Kyllä, suurinpiirtein	Ei	Ei	Ei	Kyllä	Kyllä	Kyllä	Kyllä	Ei	Ei koskaan	Ei koskaan	En osaa sanoa	Aina	Usein	Harvoin	Usein	Usein	Joskus	Usein	Harvoin	Joskus	Joskus	Usein	Ei koskaan
55-64	Nainen	Opistoasteen tutkinto	1 (Asun yksin)	0	Osa-aikainen	Suomi	2002	Itä-Uusimaa (ja HUS)	Ei	Erikoissairaanhoidossa (esim. sairaalan neurologian poliklinikka)			MS-tauti hoitotasapainossa, arjen toimintakyky alentunut			1	0	0	3	1	1	En ollenkaan	En ollenkaan	Kohtalainen	Erinomainen	Ei	Ei	Kyllä	Kyllä	Ei	Kyllä	Ei	Ei	Ei	Joskus	Ei koskaan	En osaa sanoa	Harvoin	Aina	Usein	Aina	Aina	Aina	Aina	Harvoin	Aina	Usein	Usein	Usein
45-54	Nainen	Ylempi korkeakoulututkinto	1 (Asun yksin)	0	Eläkkeellä (ml. työkyvyttömyyseläke)	Ruotsi	2012	Varsinais-Suomi	Kyllä	Erikoissairaanhoidossa (esim. sairaalan neurologian poliklinikka)			MS-tauti hoitotasapainossa, arjen toimintakyky alentunut			0	0	2	0	2	2	En ollenkaan	En ollenkaan	Kohtalainen	Hyvä	Kyllä, suurinpiirtein	Ei	Kyllä	Kyllä	En osaa sanoa	Ei	Ei	Ei	Ei	Joskus	Ei koskaan	En osaa sanoa	Usein	Joskus	Joskus	Usein	Usein	Usein	Usein	Ei koskaan	Joskus	Ei koskaan	En osaa sanoa	En osaa sanoa
65-74	Nainen	Opistoasteen tutkinto	2	0	Eläkkeellä (ml. työkyvyttömyyseläke)	Suomi	1990	Helsinki (ja HUS)	Ei	En osaa sanoa			MS-tauti hoitotasapainossa, arjen toimintakyky alentunut			3	0	28	0	Lääkäri 3, fysioterapeutti 26	0	En ollenkaan	En ollenkaan	En osaa sanoa	Hyvä	En osaa sanoa	Kyllä, varmasti	Kyllä	Kyllä	Ei	Kyllä	Ei	Ei	Ei	Ei koskaan	Ei koskaan	En osaa sanoa	Ei koskaan	Aina	En osaa sanoa	Aina	Aina	Aina	Aina	En osaa sanoa	Aina	Aina	Aina	En osaa sanoa
35-44	Nainen	Alempi korkeakoulututkinto	4	2	Täysipäiväinen	Suomi	2015	Helsinki (ja HUS)	Kyllä	Erikoissairaanhoidossa (esim. sairaalan neurologian poliklinikka)		MS-tauti hoitotasapainossa, ei juuri toimintakykyhaittaa				1	1	1	1	2	4	En ollenkaan	En ollenkaan	Hyvä	Hyvä	Kyllä, suurinpiirtein	Kyllä, varmasti	En osaa sanoa	Ei	Kyllä	Kyllä	Ei	Kyllä	Ei	Ei koskaan	Ei koskaan	En osaa sanoa	Joskus	Usein	Aina	Usein	Usein	Joskus	Harvoin	Ei koskaan	Joskus	Joskus	Usein	Ei koskaan
65-74	Nainen	Toinen aste (Lukio tai ammattikoulu)	1 (Asun yksin)	0	Eläkkeellä (ml. työkyvyttömyyseläke)	Suomi	2001	Keski-Suomi	Ei	Erikoissairaanhoidossa (esim. sairaalan neurologian poliklinikka)			MS-tauti hoitotasapainossa, arjen toimintakyky alentunut			440	0	0	0	2	2	En ollenkaan	En ollenkaan	Kohtalainen	Kohtalainen	Ei	Kyllä, suurinpiirtein	Kyllä	Ei	En osaa sanoa	Kyllä	En osaa sanoa	Kyllä	Ei	En osaa sanoa	Ei koskaan	En osaa sanoa	Usein	Usein	Harvoin	Usein	Usein	Usein	Joskus	Harvoin	Joskus	Harvoin	Harvoin	Ei koskaan
65-74	Mies	Alempi korkeakoulututkinto	2	0	Eläkkeellä (ml. työkyvyttömyyseläke)	Suomi	2010	Keski-Uusimaa (ja HUS)	Kyllä	Erikoissairaanhoidossa (esim. sairaalan neurologian poliklinikka)			MS-tauti hoitotasapainossa, arjen toimintakyky alentunut			1	2	4	3	1	4	En ollenkaan	En ollenkaan	Huono	Huono	Ei	Ei	Kyllä	Kyllä	Kyllä	Kyllä	Kyllä	Ei	Ei	Ei koskaan	Ei koskaan	En osaa sanoa	Joskus	Usein	Harvoin	Usein	Usein	Joskus	Usein	Ei koskaan	Joskus	Harvoin	Ei koskaan	Ei koskaan
25-34	Nainen	Toinen aste (Lukio tai ammattikoulu)	2	0	Täysipäiväinen	Suomi	2021	Vantaa-Kerava (ja HUS)	Kyllä	Erikoissairaanhoidossa (esim. sairaalan neurologian poliklinikka)		MS-tauti hoitotasapainossa, ei juuri toimintakykyhaittaa				1	4	6	3	0	0	En ollenkaan	En ollenkaan	Hyvä	Hyvä	Ei	Kyllä, suurinpiirtein	Kyllä	Ei	Kyllä	Ei	Kyllä	Ei	Ei	Harvoin	Ei koskaan	Ei koskaan	Aina	Ei koskaan	Ei koskaan	Ei koskaan	Joskus	Harvoin	Joskus	Ei koskaan	Ei koskaan	Ei koskaan	Ei koskaan	Ei koskaan
45-54	Mies	Ylempi korkeakoulututkinto	2	0	Täysipäiväinen	Suomi	1997	Keski-Pohjanmaa	Kyllä	Erikoissairaanhoidossa (esim. sairaalan neurologian poliklinikka)			MS-tauti hoitotasapainossa, arjen toimintakyky alentunut			20	0	2	0	4	1	En ollenkaan	Yli 7 päivää	Tyydyttävä	Hyvä	Kyllä, suurinpiirtein	Kyllä, varmasti	Kyllä	Kyllä	Kyllä	Kyllä	Ei	Kyllä	Ei	Harvoin	Ei koskaan	Aina	Usein	Usein	Joskus	Usein	Usein	Aina	Usein	Joskus	Usein	Harvoin	Usein	Joskus
35-44	Nainen	Alempi korkeakoulututkinto	3	1	Täysipäiväinen	Suomi	2023	Lappi	Ei	Erikoissairaanhoidossa (esim. sairaalan neurologian poliklinikka)	Uusi MS-tauti diagnoosi	MS-tauti hoitotasapainossa, ei juuri toimintakykyhaittaa				4	4	5	5	2	6	Alle 7 päivää	En ollenkaan	Erinomainen	Erinomainen	En osaa sanoa	Kyllä, suurinpiirtein	Ei	Kyllä	Kyllä	Kyllä	En osaa sanoa	Kyllä	Ei	Ei koskaan	Joskus	Harvoin	Aina	Usein	Usein	Joskus	Usein	Usein	Aina	Aina	Aina	Aina	Aina	Ei koskaan
55-64	Nainen	Toinen aste (Lukio tai ammattikoulu)	1 (Asun yksin)	0	Eläkkeellä (ml. työkyvyttömyyseläke)	Suomi	1998	Helsinki (ja HUS)	Ei	Erikoissairaanhoidossa (esim. sairaalan neurologian poliklinikka)			MS-tauti hoitotasapainossa, arjen toimintakyky alentunut			1	0	42	2	2	2	En ollenkaan	En ollenkaan	Hyvä	Hyvä	Kyllä, suurinpiirtein	Kyllä, suurinpiirtein	Kyllä	Ei	Ei	En osaa sanoa	Ei	Ei	Ei	Harvoin	Ei koskaan	En osaa sanoa	Harvoin	Aina	Ei koskaan	Aina	Usein	Aina	Usein	Harvoin	Usein	Usein	Usein	Joskus
35-44	Nainen	Alempi korkeakoulututkinto	3	1	Täysipäiväinen	Suomi	2022	Helsinki (ja HUS)	Ei	Erikoissairaanhoidossa (esim. sairaalan neurologian poliklinikka)			MS-tauti hoitotasapainossa, arjen toimintakyky alentunut			1	2	1	1	2	1	En ollenkaan	En ollenkaan	Hyvä	Hyvä	En osaa sanoa	En osaa sanoa	Kyllä	En osaa sanoa	Kyllä	Kyllä	Ei	Kyllä	En osaa sanoa	Ei koskaan	Ei koskaan	En osaa sanoa	Joskus	Aina	Joskus	Aina	Aina	Aina	Aina	En osaa sanoa	Usein	Usein	Joskus	Harvoin
35-44	Nainen	Opistoasteen tutkinto	2	0	Eläkkeellä (ml. työkyvyttömyyseläke)	Suomi	2022	Kanta-Häme	Kyllä	Erikoissairaanhoidossa (esim. sairaalan neurologian poliklinikka)			MS-tauti hoitotasapainossa, arjen toimintakyky alentunut			4	3	6	35	5	2	En ollenkaan	En ollenkaan	Tyydyttävä	Hyvä	Ei	Kyllä, suurinpiirtein	Kyllä	En osaa sanoa	Kyllä	Kyllä	Ei	Kyllä	En osaa sanoa	Joskus	Ei koskaan	En osaa sanoa	Usein	Harvoin	Aina	Usein	Usein	Aina	Usein	Aina	Usein	Aina	Aina	Usein
25-34	Nainen	Peruskoulu	2	0	Työtön	Suomi	2020	Pohjois-Karjala	Kyllä	Erikoissairaanhoidossa (esim. sairaalan neurologian poliklinikka)			MS-tauti hoitotasapainossa, arjen toimintakyky alentunut			3	5	10	5	3	2	En ollenkaan	En ollenkaan	Tyydyttävä	Huono	Ei	Kyllä, varmasti	Ei	Ei	Kyllä	Ei	Kyllä	Kyllä	Ei	Ei koskaan	Ei koskaan	En osaa sanoa	Usein	En osaa sanoa	Joskus	Usein	Joskus	Joskus	Ei koskaan	Ei koskaan	Ei koskaan	Ei koskaan	Joskus	Ei koskaan
25-34	Nainen	Alempi korkeakoulututkinto	2	0	Täysipäiväinen	Suomi	2021	Pirkanmaa	Ei	Erikoissairaanhoidossa (esim. sairaalan neurologian poliklinikka)		MS-tauti hoitotasapainossa, ei juuri toimintakykyhaittaa				1	1	3	2	1	2	En ollenkaan	En ollenkaan	Hyvä	Hyvä	En osaa sanoa	Kyllä, suurinpiirtein	Ei	Ei	Kyllä	Kyllä	Kyllä	Kyllä	Ei	Ei koskaan	Ei koskaan	En osaa sanoa	Joskus	Usein	Aina	Joskus	Joskus	Usein	Aina	Joskus	Usein	Joskus	Usein	En osaa sanoa
35-44	Nainen	Alempi korkeakoulututkinto	4	2	Eläkkeellä (ml. työkyvyttömyyseläke)	Suomi	1998	Pohjois-Pohjanmaa	Ei	Erikoissairaanhoidossa (esim. sairaalan neurologian poliklinikka)			MS-tauti hoitotasapainossa, arjen toimintakyky alentunut			1	0	1	0	1	2	En ollenkaan	En ollenkaan	Tyydyttävä	Tyydyttävä	Kyllä, suurinpiirtein	Kyllä, varmasti	Ei	Kyllä	Ei	Kyllä	En osaa sanoa	Kyllä	Ei	Ei koskaan	Ei koskaan	En osaa sanoa	Harvoin	Usein	Joskus	Usein	Usein	Usein	Usein	Ei koskaan	Usein	Joskus	Usein	Ei koskaan
45-54	Mies	Ylempi korkeakoulututkinto	4	1	Eläkkeellä (ml. työkyvyttömyyseläke)	Suomi	2012	Pohjanmaa	Ei	Erikoissairaanhoidossa (esim. sairaalan neurologian poliklinikka)		MS-tauti hoitotasapainossa, ei juuri toimintakykyhaittaa				0	0	0	0	2	0	En halua sanoa	En ollenkaan	Hyvä	Hyvä	Ei	Ei	Kyllä	Kyllä	Ei	Kyllä	Ei	Ei	Ei	Ei koskaan	Ei koskaan	En osaa sanoa	En osaa sanoa	Aina	Ei koskaan	Aina	Aina	Aina	Aina	Ei koskaan	Aina	Usein	Aina	Ei koskaan
45-54	Nainen	Alempi korkeakoulututkinto	4	2	Eläkkeellä (ml. työkyvyttömyyseläke)	Suomi	2018	Pohjois-Pohjanmaa	Kyllä	Erikoissairaanhoidossa (esim. sairaalan neurologian poliklinikka)		MS-tauti hoitotasapainossa, ei juuri toimintakykyhaittaa				30	2	1	5	1	1	En ollenkaan	En ollenkaan	Tyydyttävä	Hyvä	Kyllä, suurinpiirtein	Ei	Kyllä	Ei	Ei	Kyllä	Ei	Kyllä	Ei	Ei koskaan	En osaa sanoa	En osaa sanoa	Aina	Joskus	Usein	Usein	Usein	Usein	Usein	Ei koskaan	Harvoin	Ei koskaan	Usein	Ei koskaan
45-54	Nainen	Ylempi korkeakoulututkinto	4	1	Täysipäiväinen	Ruotsi	2015	Itä-Uusimaa (ja HUS)	Ei	Erikoissairaanhoidossa (esim. sairaalan neurologian poliklinikka)		MS-tauti hoitotasapainossa, ei juuri toimintakykyhaittaa				2	0	2	1	2	5	En ollenkaan	En ollenkaan	Hyvä	Hyvä	Kyllä, suurinpiirtein	Kyllä, suurinpiirtein	Kyllä	Kyllä	Kyllä	Kyllä	Kyllä	Ei	Ei	Ei koskaan	Ei koskaan	En osaa sanoa	Harvoin	Usein	Usein	Usein	Usein	Usein	Usein	Joskus	Usein	Usein	Usein	Harvoin
45-54	Mies	Alempi korkeakoulututkinto	4	2	Osa-aikainen	Suomi	2006	Pirkanmaa	Ei	Erikoissairaanhoidossa (esim. sairaalan neurologian poliklinikka)			MS-tauti hoitotasapainossa, arjen toimintakyky alentunut			1	1	1	1	4	2	En ollenkaan	En ollenkaan	Hyvä	Hyvä	Kyllä, suurinpiirtein	Kyllä, varmasti	En osaa sanoa	Kyllä	Kyllä	Kyllä	Ei	Ei	Ei	Ei koskaan	Ei koskaan	En osaa sanoa	Joskus	Usein	Usein	Aina	Aina	Aina	Aina	En osaa sanoa	Aina	Aina	Usein	Joskus
35-44	Nainen	Alempi korkeakoulututkinto	4	2	Täysipäiväinen	Suomi	2015	Pohjois-Savo	Ei	Erikoissairaanhoidossa (esim. sairaalan neurologian poliklinikka)			MS-tauti hoitotasapainossa, arjen toimintakyky alentunut			1	0	3	1	2	2	En ollenkaan	En ollenkaan	Tyydyttävä	Hyvä	Kyllä, suurinpiirtein	Kyllä, suurinpiirtein	Ei	Ei	Kyllä	En osaa sanoa	Ei	Ei	Ei	Joskus	En osaa sanoa	En osaa sanoa	Harvoin	Usein	Usein	Usein	Usein	Usein	Aina	Ei koskaan	En osaa sanoa	Ei koskaan	Aina	Ei koskaan
45-54	Nainen	Toinen aste (Lukio tai ammattikoulu)	3	0	Täysipäiväinen	Suomi	2022	Satakunta	Ei	Erikoissairaanhoidossa (esim. sairaalan neurologian poliklinikka)			MS-tauti hoitotasapainossa, arjen toimintakyky alentunut			1	0	20	0	1	3	En ollenkaan	En ollenkaan	Hyvä	Tyydyttävä	Kyllä, suurinpiirtein	Kyllä, suurinpiirtein	En osaa sanoa	Kyllä	Ei	Ei	Kyllä	Kyllä	Ei	Ei koskaan	Ei koskaan	En osaa sanoa	Ei koskaan	Joskus	Harvoin	Usein	Joskus	Joskus	Joskus	Ei koskaan	En osaa sanoa	Harvoin	En osaa sanoa	Ei koskaan
55-64	Nainen	Opistoasteen tutkinto	2	0	Eläkkeellä (ml. työkyvyttömyyseläke)	Suomi	2002	Varsinais-Suomi	Ei	Erikoissairaanhoidossa (esim. sairaalan neurologian poliklinikka)				MS-tauti ei hoitotasapainossa (esim. pahenemisvaihe)		3	2	6	2	3	3	En ollenkaan	Yli 7 päivää	Kohtalainen	Tyydyttävä	En osaa sanoa	Kyllä, suurinpiirtein	Kyllä	Kyllä	Kyllä	Kyllä	Ei	Kyllä	Kyllä	Ei koskaan	Ei koskaan	En osaa sanoa	Joskus	Usein	Usein	Usein	Usein	Aina	Aina	Usein	Usein	Usein	Usein	Usein
45-54	Nainen	Alempi korkeakoulututkinto	4	2	Osa-aikainen	Suomi	2009	Pohjois-Savo	Kyllä	Erikoissairaanhoidossa (esim. sairaalan neurologian poliklinikka)		MS-tauti hoitotasapainossa, ei juuri toimintakykyhaittaa				2	0	6	0	1	6	En ollenkaan	Yli 7 päivää	Hyvä	Hyvä	Kyllä, suurinpiirtein	Kyllä, varmasti	Kyllä	Kyllä	Ei	Kyllä	Ei	Ei	Ei	Ei koskaan	Ei koskaan	Ei koskaan	Joskus	Usein	Usein	Usein	Usein	Usein	Aina	Usein	Usein	Aina	Usein	Usein
25-34	Nainen	Alempi korkeakoulututkinto	3	1	Täysipäiväinen	Suomi	2023	Pohjois-Karjala	Ei	Erikoissairaanhoidossa (esim. sairaalan neurologian poliklinikka)	Uusi MS-tauti diagnoosi		MS-tauti hoitotasapainossa, arjen toimintakyky alentunut			4	6	6	4	5	15	En ollenkaan	En ollenkaan	Tyydyttävä	Kohtalainen	Kyllä, varmasti	Kyllä, varmasti	Kyllä	Kyllä	Kyllä	Ei	Kyllä	Kyllä	Ei	Ei koskaan	En osaa sanoa	En osaa sanoa	Joskus	Ei koskaan	Harvoin	Joskus	Harvoin	Joskus	Joskus	Harvoin	Harvoin	Ei koskaan	Harvoin	Ei koskaan
35-44	Nainen	Ylempi korkeakoulututkinto	1 (Asun yksin)	0	Eläkkeellä (ml. työkyvyttömyyseläke)	Suomi	2004	Pohjois-Karjala	En osaa sanoa	Erikoissairaanhoidossa (esim. sairaalan neurologian poliklinikka)			MS-tauti hoitotasapainossa, arjen toimintakyky alentunut			0	0	0	0	0	0	En ollenkaan	En ollenkaan	Tyydyttävä	Tyydyttävä	En osaa sanoa	En osaa sanoa	Kyllä	Ei	Kyllä	Kyllä	Kyllä	Kyllä	En osaa sanoa	Ei koskaan	En osaa sanoa	En osaa sanoa	Usein	Ei koskaan	Ei koskaan	Harvoin	Joskus	Usein	Joskus	Ei koskaan	Ei koskaan	Joskus	Joskus	Ei koskaan
35-44	Nainen	Alempi korkeakoulututkinto	4	2	Osa-aikainen	Suomi	2012	Keski-Uusimaa (ja HUS)	Ei	Erikoissairaanhoidossa (esim. sairaalan neurologian poliklinikka)		MS-tauti hoitotasapainossa, ei juuri toimintakykyhaittaa				2	3	6	1	4	5	En ollenkaan	En ollenkaan	Tyydyttävä	Hyvä	Ei	Kyllä, suurinpiirtein	Kyllä	Ei	Ei	Ei	Ei	Kyllä	Ei	Harvoin	Ei koskaan	En osaa sanoa	Aina	Joskus	Harvoin	Joskus	Joskus	Joskus	Usein	Ei koskaan	Joskus	Harvoin	Usein	Ei koskaan
35-44	Nainen	Opistoasteen tutkinto	2	0	Osa-aikainen	Suomi	2011	Keski-Uusimaa (ja HUS)	Kyllä	Perusterveydenhuollossa (esim. terveyskeskus tai - asema)			MS-tauti hoitotasapainossa, arjen toimintakyky alentunut			5	8	4	6	6	10	Alle 7 päivää	Alle 7 päivää	Tyydyttävä	Hyvä	Kyllä, suurinpiirtein	Kyllä, suurinpiirtein	Kyllä	Ei	Kyllä	Kyllä	Kyllä	Kyllä	Kyllä	Ei koskaan	Ei koskaan	En osaa sanoa	Usein	Joskus	Usein	Usein	Usein	Usein	Usein	Usein	Usein	Usein	Usein	Ei koskaan
35-44	Nainen	Tutkijakoulutus	1 (Asun yksin)	0	Eläkkeellä (ml. työkyvyttömyyseläke)	Suomi	2020	Helsinki (ja HUS)	Ei	Erikoissairaanhoidossa (esim. sairaalan neurologian poliklinikka)			MS-tauti hoitotasapainossa, arjen toimintakyky alentunut			100	0	0	1	4	2	En ollenkaan	Yli 7 päivää	Hyvä	Hyvä	Kyllä, suurinpiirtein	En osaa sanoa	Kyllä	En osaa sanoa	En osaa sanoa	Ei	Ei	Kyllä	En osaa sanoa	Joskus	Ei koskaan	En osaa sanoa	Joskus	Aina	Harvoin	Usein	Usein	Usein	Aina	Ei koskaan	Usein	Ei koskaan	Usein	Ei koskaan
55-64	Nainen	Alempi korkeakoulututkinto	3	0	Työtön	Suomi	1997	Keski-Suomi	Kyllä	Erikoissairaanhoidossa (esim. sairaalan neurologian poliklinikka)		MS-tauti hoitotasapainossa, ei juuri toimintakykyhaittaa				1	0	2	0	2	3	En ollenkaan	En ollenkaan	Tyydyttävä	Hyvä	Kyllä, suurinpiirtein	Kyllä, varmasti	Ei	Ei	Ei	Kyllä	Ei	Ei	En osaa sanoa	Harvoin	En osaa sanoa	En osaa sanoa	Joskus	Usein	Usein	Aina	Usein	Aina	Aina	Joskus	Aina	Usein	Usein	Harvoin
55-64	Mies	Opistoasteen tutkinto	1 (Asun yksin)	0	Eläkkeellä (ml. työkyvyttömyyseläke)	Suomi	2019	Pohjois-Pohjanmaa	Kyllä	Perusterveydenhuollossa (esim. terveyskeskus tai - asema)			MS-tauti hoitotasapainossa, arjen toimintakyky alentunut			5	0	10	0	1	9	En ollenkaan	Alle 7 päivää	Kohtalainen	Hyvä	Kyllä, suurinpiirtein	Kyllä, varmasti	Kyllä	Kyllä	Ei	Ei	Ei	Ei	Ei	Ei koskaan	Ei koskaan	En osaa sanoa	Usein	Usein	Aina	Usein	Usein	Aina	Usein	Joskus	Joskus	Joskus	Usein	Aina
35-44	Nainen	Toinen aste (Lukio tai ammattikoulu)	4	2	Täysipäiväinen	Suomi	2022	Itä-Uusimaa (ja HUS)	Kyllä	Erikoissairaanhoidossa (esim. sairaalan neurologian poliklinikka)				MS-tauti ei hoitotasapainossa (esim. pahenemisvaihe)		4	2	2	0	2	0	Alle 7 päivää	En ollenkaan	Tyydyttävä	Kohtalainen	Ei	Ei	Ei	Ei	Kyllä	Ei	Kyllä	Kyllä	Ei	Joskus	Ei koskaan	En osaa sanoa	Usein	Joskus	Harvoin	Joskus	Harvoin	Harvoin	Harvoin	Ei koskaan	Harvoin	Ei koskaan	Joskus	Ei koskaan
65-74	Nainen	Ylempi korkeakoulututkinto	1 (Asun yksin)	0	Eläkkeellä (ml. työkyvyttömyyseläke)	Suomi	2013	Helsinki (ja HUS)	Ei	Erikoissairaanhoidossa (esim. sairaalan neurologian poliklinikka)		MS-tauti hoitotasapainossa, ei juuri toimintakykyhaittaa				1	0	1	0	1	1	En ollenkaan	En ollenkaan	Tyydyttävä	Hyvä	Kyllä, suurinpiirtein	Kyllä, varmasti	Kyllä	Kyllä	Kyllä	Kyllä	Ei	Ei	Ei	Ei koskaan	Ei koskaan	Ei koskaan	Joskus	Aina	Aina	Aina	Aina	Aina	Aina	Ei koskaan	Usein	Ei koskaan	Aina	Ei koskaan
55-64	Mies	Ylempi korkeakoulututkinto	2	0	Eläkkeellä (ml. työkyvyttömyyseläke)	Suomi	2018	Pirkanmaa	Ei	Erikoissairaanhoidossa (esim. sairaalan neurologian poliklinikka)			MS-tauti hoitotasapainossa, arjen toimintakyky alentunut			2	2	40	2	4	1	En ollenkaan	Yli 7 päivää	Tyydyttävä	Tyydyttävä	En osaa sanoa	Kyllä, suurinpiirtein	Kyllä	Kyllä	Ei	Kyllä	Kyllä	Ei	Ei	Ei koskaan	Ei koskaan	En osaa sanoa	Usein	Usein	Harvoin	Usein	Usein	Usein	Aina	Ei koskaan	Joskus	Ei koskaan	Joskus	Ei koskaan
55-64	Nainen	Ylempi korkeakoulututkinto	2	0	Täysipäiväinen	Suomi	2019	Länsi-Uusimaa (ja HUS)	Kyllä	Erikoissairaanhoidossa (esim. sairaalan neurologian poliklinikka)			MS-tauti hoitotasapainossa, arjen toimintakyky alentunut			3	2	6	2	2	5	En ollenkaan	Yli 7 päivää	Hyvä	Hyvä	En osaa sanoa	En osaa sanoa	Kyllä	Kyllä	Kyllä	Kyllä	Ei	Kyllä	Ei	En osaa sanoa	Ei koskaan	En osaa sanoa	Joskus	Usein	Usein	Usein	Usein	Usein	Usein	Usein	Usein	Usein	Usein	Harvoin
55-64	Nainen	Peruskoulu	1 (Asun yksin)	0	Täysipäiväinen	Suomi	2015	Helsinki (ja HUS)	Ei	Erikoissairaanhoidossa (esim. sairaalan neurologian poliklinikka)		MS-tauti hoitotasapainossa, ei juuri toimintakykyhaittaa		MS-tauti ei hoitotasapainossa (esim. pahenemisvaihe)		1	0	1	0	1	10	En ollenkaan	En ollenkaan	Hyvä	Erinomainen	Kyllä, suurinpiirtein	Kyllä, varmasti	Kyllä	Kyllä	Ei	Kyllä	Ei	Ei	Ei	Harvoin	Ei koskaan	Ei koskaan	Ei koskaan	Aina	Aina	Aina	Aina	Aina	Aina	En osaa sanoa	Aina	Aina	Aina	Ei koskaan
65-74	Nainen	Toinen aste (Lukio tai ammattikoulu)	1 (Asun yksin)	0	Eläkkeellä (ml. työkyvyttömyyseläke)	Suomi	2009	Keski-Uusimaa (ja HUS)	Ei	En osaa sanoa			MS-tauti hoitotasapainossa, arjen toimintakyky alentunut			50	0	50	0	50	0	En ollenkaan	En ollenkaan	Kohtalainen	En osaa sanoa	En osaa sanoa	En osaa sanoa	Ei	Ei	Ei	Ei	Ei	Kyllä	Ei	En osaa sanoa	En osaa sanoa	En osaa sanoa	En osaa sanoa	En osaa sanoa	En osaa sanoa	En osaa sanoa	En osaa sanoa	En osaa sanoa	En osaa sanoa	En osaa sanoa	En osaa sanoa	En osaa sanoa	En osaa sanoa	Harvoin
45-54	Nainen	Alempi korkeakoulututkinto	3	0	Osa-aikainen	Suomi	2003	Satakunta	Ei	Erikoissairaanhoidossa (esim. sairaalan neurologian poliklinikka)		MS-tauti hoitotasapainossa, ei juuri toimintakykyhaittaa				2	1	1	1	3	3	En ollenkaan	En ollenkaan	Tyydyttävä	Tyydyttävä	Ei	Kyllä, suurinpiirtein	Kyllä	Kyllä	Kyllä	Kyllä	Ei	Kyllä	Ei	Joskus	En osaa sanoa	En osaa sanoa	Aina	Joskus	Joskus	Usein	Usein	Usein	Joskus	Ei koskaan	Joskus	Ei koskaan	Usein	Harvoin
55-64	Nainen	Ylempi korkeakoulututkinto	2	0	Eläkkeellä (ml. työkyvyttömyyseläke)	Ruotsi	1993	Länsi-Uusimaa (ja HUS)	Ei	Erikoissairaanhoidossa (esim. sairaalan neurologian poliklinikka)			MS-tauti hoitotasapainossa, arjen toimintakyky alentunut			2	0	1	0	2	1	En ollenkaan	En ollenkaan	Kohtalainen	Hyvä	En osaa sanoa	En osaa sanoa	Kyllä	Kyllä	Ei	Kyllä	Kyllä	Kyllä	Ei	Ei koskaan	Ei koskaan	En osaa sanoa	Joskus	Usein	Harvoin	Usein	Aina	Aina	Joskus	Joskus	Usein	Joskus	Usein	Joskus
45-54	Mies	Ylempi korkeakoulututkinto	1 (Asun yksin)	0	Osa-aikainen	Ruotsi	2020	Pohjanmaa	Kyllä	Erikoissairaanhoidossa (esim. sairaalan neurologian poliklinikka)					En halua sanoa	1	0	8	2	4	5	En ollenkaan	En halua sanoa	Kohtalainen	Kohtalainen	Kyllä, suurinpiirtein	Ei	Kyllä	Kyllä	Kyllä	En osaa sanoa	Ei	Ei	Ei	En osaa sanoa	En osaa sanoa	En osaa sanoa	En osaa sanoa	Joskus	Joskus	Ei koskaan	Harvoin	Joskus	Harvoin	Joskus	Ei koskaan	Ei koskaan	Ei koskaan	Ei koskaan
45-54	Nainen	Opistoasteen tutkinto	1 (Asun yksin)	0	Muu	Suomi	2006	Kanta-Häme	Kyllä	Erikoissairaanhoidossa (esim. sairaalan neurologian poliklinikka)			MS-tauti hoitotasapainossa, arjen toimintakyky alentunut			16	4	6	1	4	7	En ollenkaan	Yli 7 päivää	Hyvä	Hyvä	Ei	Ei	En osaa sanoa	En osaa sanoa	Kyllä	Kyllä	Ei	Kyllä	Kyllä	Ei koskaan	Ei koskaan	Ei koskaan	Aina	Joskus	Usein	Usein	Usein	Usein	Usein	Joskus	Usein	Usein	Usein	Harvoin
55-64	Mies	Toinen aste (Lukio tai ammattikoulu)	2	0	Eläkkeellä (ml. työkyvyttömyyseläke)	Suomi	2010	Lappi	Kyllä	Erikoissairaanhoidossa (esim. sairaalan neurologian poliklinikka)			MS-tauti hoitotasapainossa, arjen toimintakyky alentunut			45	0	3	0	4	4	En ollenkaan	Yli 7 päivää	Tyydyttävä	En osaa sanoa	Ei	Ei	Ei	Kyllä	Ei	En osaa sanoa	Kyllä	Kyllä	Ei	Ei koskaan	Ei koskaan	En osaa sanoa	Aina	Aina	Ei koskaan	Aina	Usein	Usein	Aina	Usein	Usein	Aina	Joskus	Aina
35-44	Nainen	Toinen aste (Lukio tai ammattikoulu)	1 (Asun yksin)	0	Täysipäiväinen	Suomi	2019	Pirkanmaa	Ei	Erikoissairaanhoidossa (esim. sairaalan neurologian poliklinikka)			MS-tauti hoitotasapainossa, arjen toimintakyky alentunut			2	0	10	2	1	5	En ollenkaan	En ollenkaan	Tyydyttävä	Hyvä	Kyllä, suurinpiirtein	Kyllä, suurinpiirtein	Kyllä	Ei	Kyllä	Kyllä	Ei	Kyllä	Ei	Ei koskaan	Ei koskaan	En osaa sanoa	Harvoin	Usein	Usein	Usein	Joskus	Joskus	Aina	Joskus	Joskus	Joskus	Joskus	Joskus
45-54	Nainen	Opistoasteen tutkinto	2	0	Osa-aikainen	Suomi	2008	Etelä-Pohjanmaa	Kyllä	Erikoissairaanhoidossa (esim. sairaalan neurologian poliklinikka)		MS-tauti hoitotasapainossa, ei juuri toimintakykyhaittaa				1	0	5	3	2	3	En ollenkaan	Yli 7 päivää	Tyydyttävä	Erinomainen	Kyllä, suurinpiirtein	Kyllä, suurinpiirtein	Kyllä	Kyllä	Kyllä	Kyllä	Ei	Ei	Kyllä	Harvoin	Ei koskaan	Ei koskaan	Joskus	Aina	Aina	Aina	Usein	Aina	Aina	Joskus	Aina	Aina	Usein	Harvoin
55-64	Nainen	Opistoasteen tutkinto	2	0	Eläkkeellä (ml. työkyvyttömyyseläke)	Suomi	2003	Varsinais-Suomi	Ei	Perusterveydenhuollossa (esim. terveyskeskus tai - asema)			MS-tauti hoitotasapainossa, arjen toimintakyky alentunut			40	2	0	0	3	0	En ollenkaan	Yli 7 päivää	Kohtalainen	Tyydyttävä	Kyllä, suurinpiirtein	Kyllä, suurinpiirtein	Kyllä	Kyllä	Ei	En osaa sanoa	Kyllä	Kyllä	Ei	Ei koskaan	Ei koskaan	Ei koskaan	Usein	Joskus	Ei koskaan	Joskus	Joskus	Joskus	Joskus	Ei koskaan	Harvoin	Harvoin	Joskus	Harvoin
45-54	Nainen	Alempi korkeakoulututkinto	1 (Asun yksin)	0	Eläkkeellä (ml. työkyvyttömyyseläke)	Suomi	2019	Helsinki (ja HUS)	Ei	Erikoissairaanhoidossa (esim. sairaalan neurologian poliklinikka)			MS-tauti hoitotasapainossa, arjen toimintakyky alentunut			62	0	2	4	4	1	En ollenkaan	En ollenkaan	Hyvä	Erinomainen	Kyllä, varmasti	Ei	Kyllä	Ei	Kyllä	Kyllä	Kyllä	Ei	Ei	Joskus	Ei koskaan	En osaa sanoa	Joskus	Aina	Ei koskaan	Usein	Usein	Usein	Usein	Ei koskaan	En osaa sanoa	En osaa sanoa	Usein	Ei koskaan
45-54	Nainen	Alempi korkeakoulututkinto	2	1	Eläkkeellä (ml. työkyvyttömyyseläke)	Suomi	2010	Keski-Suomi	Kyllä	Erikoissairaanhoidossa (esim. sairaalan neurologian poliklinikka)		MS-tauti hoitotasapainossa, ei juuri toimintakykyhaittaa				1	0	10	5	4	5	En ollenkaan	En ollenkaan	Hyvä	Hyvä	Ei	Ei	En osaa sanoa	Ei	Ei	Kyllä	En osaa sanoa	Kyllä	Ei	Ei koskaan	Ei koskaan	En osaa sanoa	Usein	Usein	Ei koskaan	Usein	Joskus	Harvoin	Ei koskaan	Ei koskaan	Joskus	Harvoin	Harvoin	Ei koskaan
25-34	Nainen	Toinen aste (Lukio tai ammattikoulu)	2	0	Osa-aikainen	Suomi	2020	Pirkanmaa	Kyllä	Erikoissairaanhoidossa (esim. sairaalan neurologian poliklinikka)		MS-tauti hoitotasapainossa, ei juuri toimintakykyhaittaa	MS-tauti hoitotasapainossa, arjen toimintakyky alentunut			5	5	5	6	4	5	En ollenkaan	Yli 7 päivää	Tyydyttävä	Tyydyttävä	Ei	Kyllä, suurinpiirtein	Kyllä	Ei	Kyllä	Kyllä	Ei	Kyllä	Kyllä	Harvoin	Ei koskaan	En osaa sanoa	Joskus	Usein	Joskus	Joskus	Usein	Usein	Joskus	Harvoin	Joskus	Usein	Usein	Joskus
45-54	Nainen	Opistoasteen tutkinto	5 tai enemmän	1	Täysipäiväinen	Suomi	1992	Vantaa-Kerava (ja HUS)	Kyllä	Perusterveydenhuollossa (esim. terveyskeskus tai - asema)			MS-tauti hoitotasapainossa, arjen toimintakyky alentunut			10	1	10	0	2	3	En ollenkaan	En ollenkaan	Tyydyttävä	Kohtalainen	Kyllä, varmasti	Kyllä, varmasti	Kyllä	Kyllä	Ei	Ei	Kyllä	Kyllä	Ei	Harvoin	Ei koskaan	En osaa sanoa	Aina	Harvoin	Harvoin	Joskus	Joskus	Joskus	Joskus	Ei koskaan	Joskus	Ei koskaan	Joskus	Harvoin
55-64	Nainen	Alempi korkeakoulututkinto	2	0	Eläkkeellä (ml. työkyvyttömyyseläke)	Suomi	2016	Pirkanmaa	Ei	Erikoissairaanhoidossa (esim. sairaalan neurologian poliklinikka)			MS-tauti hoitotasapainossa, arjen toimintakyky alentunut			2	2	2	0	2	2	En ollenkaan	En ollenkaan	Hyvä	Hyvä	Kyllä, varmasti	Kyllä, varmasti	Kyllä	Kyllä	Kyllä	Kyllä	Ei	Ei	Ei	En osaa sanoa	En osaa sanoa	En osaa sanoa	Joskus	Aina	En osaa sanoa	Aina	Aina	Aina	Aina	En osaa sanoa	Aina	Aina	Aina	Ei koskaan
35-44	Nainen	Alempi korkeakoulututkinto	2	0	Täysipäiväinen	Suomi	2020	Kanta-Häme	Ei	Erikoissairaanhoidossa (esim. sairaalan neurologian poliklinikka)		MS-tauti hoitotasapainossa, ei juuri toimintakykyhaittaa				1	3	5	0	2	5	En ollenkaan	En ollenkaan	Tyydyttävä	Hyvä	Kyllä, suurinpiirtein	Kyllä, suurinpiirtein	Kyllä	Kyllä	Kyllä	Kyllä	Ei	Kyllä	Ei	Ei koskaan	Ei koskaan	En osaa sanoa	Joskus	Joskus	Aina	Aina	Aina	Aina	Aina	Usein	Joskus	Harvoin	Usein	Usein
45-54	Nainen	Toinen aste (Lukio tai ammattikoulu)	2	0	Osa-aikainen	Suomi	2011	Pirkanmaa	Kyllä	Erikoissairaanhoidossa (esim. sairaalan neurologian poliklinikka)		MS-tauti hoitotasapainossa, ei juuri toimintakykyhaittaa	MS-tauti hoitotasapainossa, arjen toimintakyky alentunut			2	0	4	1	4	4	En ollenkaan	En ollenkaan	Tyydyttävä	Hyvä	Kyllä, suurinpiirtein	Kyllä, suurinpiirtein	Kyllä	Kyllä	Kyllä	En osaa sanoa	Ei	Ei	En osaa sanoa	Ei koskaan	Ei koskaan	En osaa sanoa	Joskus	Usein	Usein	Usein	Usein	Usein	Joskus	Joskus	Usein	Usein	Usein	Joskus
65-74	Nainen	Opistoasteen tutkinto	2	0	Eläkkeellä (ml. työkyvyttömyyseläke)	Suomi	1992	Keski-Suomi	Ei	Perusterveydenhuollossa (esim. terveyskeskus tai - asema)		MS-tauti hoitotasapainossa, ei juuri toimintakykyhaittaa				0	0	3	0	0	3	En ollenkaan	En ollenkaan	Tyydyttävä	Hyvä	En osaa sanoa	En osaa sanoa	En osaa sanoa	En osaa sanoa	Ei	Kyllä	Ei	Ei	Ei	En osaa sanoa	Ei koskaan	En osaa sanoa	Usein	Harvoin	Joskus	Joskus	Joskus	Joskus	Usein	Harvoin	Joskus	Harvoin	Harvoin	Ei koskaan
35-44	Nainen	Ylempi korkeakoulututkinto	3	1	Täysipäiväinen	Suomi	2016	Kymenlaakso	Ei	Erikoissairaanhoidossa (esim. sairaalan neurologian poliklinikka)		MS-tauti hoitotasapainossa, ei juuri toimintakykyhaittaa				1	0	4	0	1	3	En ollenkaan	En ollenkaan	Hyvä	Hyvä	Ei	Ei	Kyllä	Kyllä	Kyllä	Kyllä	Ei	Ei	Ei	Ei koskaan	Ei koskaan	En osaa sanoa	Joskus	Usein	Joskus	Usein	Usein	Joskus	Usein	Harvoin	Harvoin	Harvoin	Usein	Ei koskaan
45-54	Mies	Toinen aste (Lukio tai ammattikoulu)	1 (Asun yksin)	0	Täysipäiväinen	Suomi	2015	Pohjois-Pohjanmaa	Ei	Erikoissairaanhoidossa (esim. sairaalan neurologian poliklinikka)		MS-tauti hoitotasapainossa, ei juuri toimintakykyhaittaa				0	0	0	0	0	0	En ollenkaan	En ollenkaan	Hyvä	En osaa sanoa	En osaa sanoa	En osaa sanoa	Kyllä	Ei	Ei	Kyllä	Ei	Ei	Ei	Aina	En osaa sanoa	En osaa sanoa	En osaa sanoa	En osaa sanoa	En osaa sanoa	En osaa sanoa	En osaa sanoa	En osaa sanoa	En osaa sanoa	En osaa sanoa	En osaa sanoa	En osaa sanoa	En osaa sanoa	En osaa sanoa
35-44	Nainen	Alempi korkeakoulututkinto	2	1	Täysipäiväinen	Suomi	2013	Länsi-Uusimaa (ja HUS)	Ei	Erikoissairaanhoidossa (esim. sairaalan neurologian poliklinikka)		MS-tauti hoitotasapainossa, ei juuri toimintakykyhaittaa				1	0	6	3	1	7	En ollenkaan	En ollenkaan	Hyvä	Hyvä	Ei	Ei	Kyllä	Ei	Kyllä	Kyllä	Ei	Ei	Ei	Ei koskaan	Ei koskaan	En osaa sanoa	Harvoin	Aina	Usein	Aina	Aina	Aina	Aina	Harvoin	Usein	Usein	Aina	Harvoin
65-74	Nainen	Joku muu	1 (Asun yksin)	0	Eläkkeellä (ml. työkyvyttömyyseläke)	Suomi	1993	Helsinki (ja HUS)	En osaa sanoa	Yksityisellä poliklinikalla (esim. yksityinen neurologi)			MS-tauti hoitotasapainossa, arjen toimintakyky alentunut			2	1	2	4	1 yksityinen	1	En ollenkaan	En ollenkaan	Kohtalainen	Huono	Ei	Kyllä, suurinpiirtein	Ei	Ei	Kyllä	Kyllä	Ei	Kyllä	Ei	Harvoin	Ei koskaan	En osaa sanoa	Ei koskaan	Aina	Aina	Aina	Aina	Aina	Aina	Usein	Aina	Aina	Aina	Ei koskaan
45-54	Mies	Alempi korkeakoulututkinto	4	2	Täysipäiväinen	Ruotsi	2003	Pohjanmaa	Ei	Erikoissairaanhoidossa (esim. sairaalan neurologian poliklinikka)			MS-tauti hoitotasapainossa, arjen toimintakyky alentunut			1	0	5	1	1	5	En ollenkaan	En ollenkaan	Hyvä	Kohtalainen	En osaa sanoa	Kyllä, suurinpiirtein	Kyllä	Kyllä	Kyllä	Kyllä	En osaa sanoa	Kyllä	Ei	Ei koskaan	Ei koskaan	En osaa sanoa	Usein	Joskus	Joskus	Joskus	Joskus	Joskus	En osaa sanoa	En osaa sanoa	En osaa sanoa	Harvoin	Harvoin	Ei koskaan
35-44	Nainen	Toinen aste (Lukio tai ammattikoulu)	1 (Asun yksin)	0	Muu	Suomi	2006	Helsinki (ja HUS)	Kyllä	Erikoissairaanhoidossa (esim. sairaalan neurologian poliklinikka)		MS-tauti hoitotasapainossa, ei juuri toimintakykyhaittaa				1	0	10	0	1	9	En ollenkaan	Alle 7 päivää	Hyvä	Hyvä	Ei	Ei	Kyllä	Kyllä	Ei	Kyllä	Ei	Ei	Ei	Ei koskaan	Ei koskaan	En osaa sanoa	Harvoin	Aina	Aina	Aina	Aina	Aina	Aina	Ei koskaan	Aina	Ei koskaan	Aina	Ei koskaan
45-54	Nainen	Ylempi korkeakoulututkinto	2	0	Eläkkeellä (ml. työkyvyttömyyseläke)	Suomi	2018	Länsi-Uusimaa (ja HUS)	Kyllä	Erikoissairaanhoidossa (esim. sairaalan neurologian poliklinikka)			MS-tauti hoitotasapainossa, arjen toimintakyky alentunut			1	0	3	1	1	3	En ollenkaan	Alle 7 päivää	Tyydyttävä	Tyydyttävä	Ei	Ei	Kyllä	Ei	Ei	Kyllä	Kyllä	Ei	Ei	Harvoin	Ei koskaan	En osaa sanoa	Usein	Joskus	Harvoin	Aina	Joskus	Joskus	Usein	Ei koskaan	Joskus	Joskus	Harvoin	Ei koskaan
65-74	Nainen	Ylempi korkeakoulututkinto	2	0	Eläkkeellä (ml. työkyvyttömyyseläke)	Suomi	2004	Lappi	Kyllä	Erikoissairaanhoidossa (esim. sairaalan neurologian poliklinikka)		MS-tauti hoitotasapainossa, ei juuri toimintakykyhaittaa				1	1	0	3	1	3	En ollenkaan	En ollenkaan	Tyydyttävä	Hyvä	Kyllä, suurinpiirtein	Kyllä, varmasti	Kyllä	Kyllä	Ei	Kyllä	Ei	Ei	Ei	Ei koskaan	En osaa sanoa	En osaa sanoa	Joskus	Usein	Joskus	Usein	Aina	Aina	Aina	Harvoin	Aina	Aina	Aina	Harvoin
45-54	Nainen	Ylempi korkeakoulututkinto	3	0	Eläkkeellä (ml. työkyvyttömyyseläke)	Suomi	2009	Varsinais-Suomi	Ei	Erikoissairaanhoidossa (esim. sairaalan neurologian poliklinikka)		MS-tauti hoitotasapainossa, ei juuri toimintakykyhaittaa				10	2	0	0	4	0	En ollenkaan	En ollenkaan	Hyvä	Hyvä	Kyllä, suurinpiirtein	Ei	Kyllä	Ei	Ei	Kyllä	Ei	Ei	Ei	Harvoin	Ei koskaan	En osaa sanoa	Ei koskaan	Aina	Usein	Aina	Aina	Aina	Aina	Joskus	Usein	Aina	Aina	Harvoin
35-44	Nainen	Ylempi korkeakoulututkinto	4	2	Täysipäiväinen	Suomi	2002	Pohjois-Karjala	Ei	Erikoissairaanhoidossa (esim. sairaalan neurologian poliklinikka)		MS-tauti hoitotasapainossa, ei juuri toimintakykyhaittaa				1	0	2	0	1	2	En ollenkaan	En ollenkaan	Erinomainen	Erinomainen	Ei	Kyllä, suurinpiirtein	Kyllä	Kyllä	Ei	Kyllä	Ei	Ei	Ei	Ei koskaan	Ei koskaan	En osaa sanoa	Joskus	Usein	Aina	Aina	Aina	Aina	Aina	Usein	Aina	Usein	Aina	Ei koskaan
55-64	Nainen	Opistoasteen tutkinto	1 (Asun yksin)	0	Eläkkeellä (ml. työkyvyttömyyseläke)	Suomi	2022	Pohjois-Savo	Kyllä	Erikoissairaanhoidossa (esim. sairaalan neurologian poliklinikka)			MS-tauti hoitotasapainossa, arjen toimintakyky alentunut			40	4	2	1	5	3	En ollenkaan	En ollenkaan	Kohtalainen	Hyvä	Kyllä, suurinpiirtein	En osaa sanoa	En osaa sanoa	Kyllä	Kyllä	Kyllä	Ei	Kyllä	Ei	Joskus	Ei koskaan	En osaa sanoa	Usein	Usein	Joskus	Harvoin	Joskus	Joskus	Usein	Ei koskaan	Harvoin	Joskus	Usein	Joskus
35-44	Mies	Alempi korkeakoulututkinto	5 tai enemmän	3	Täysipäiväinen	Suomi	2022	Pohjanmaa	Ei	Erikoissairaanhoidossa (esim. sairaalan neurologian poliklinikka)		MS-tauti hoitotasapainossa, ei juuri toimintakykyhaittaa				1	0	0	0	0	0	En ollenkaan	Alle 7 päivää	Erinomainen	Hyvä	En osaa sanoa	En osaa sanoa	Kyllä	Kyllä	Kyllä	Kyllä	Ei	Ei	En osaa sanoa	Ei koskaan	Ei koskaan	En osaa sanoa	Ei koskaan	Aina	En osaa sanoa	Aina	Aina	Aina	Aina	Aina	Aina	Joskus	Usein	Ei koskaan
35-44	Nainen	Toinen aste (Lukio tai ammattikoulu)	1 (Asun yksin)	0	Eläkkeellä (ml. työkyvyttömyyseläke)	Suomi	2012	Pohjois-Savo	Kyllä	Erikoissairaanhoidossa (esim. sairaalan neurologian poliklinikka)				MS-tauti ei hoitotasapainossa (esim. pahenemisvaihe)		5	0	6	0	3	3	Yli 7 päivää	Yli 7 päivää	Kohtalainen	Hyvä	Kyllä, suurinpiirtein	Kyllä, varmasti	Ei	Kyllä	Kyllä	Kyllä	Kyllä	Kyllä	Kyllä	Harvoin	Ei koskaan	En osaa sanoa	Aina	Usein	Harvoin	Aina	Usein	Usein	Joskus	Ei koskaan	Usein	Joskus	Joskus	Joskus
55-64	Nainen	Opistoasteen tutkinto	2	0	Eläkkeellä (ml. työkyvyttömyyseläke)	Suomi	1996	Helsinki (ja HUS)	Kyllä	Perusterveydenhuollossa (esim. terveyskeskus tai - asema)			MS-tauti hoitotasapainossa, arjen toimintakyky alentunut			4	1	1	1	5	5	En ollenkaan	En ollenkaan	Tyydyttävä	Hyvä	Ei	Kyllä, suurinpiirtein	Kyllä	Kyllä	Kyllä	Kyllä	Ei	Ei	Kyllä	Harvoin	Ei koskaan	En osaa sanoa	Usein	Joskus	Joskus	Aina	Usein	Usein	Joskus	Ei koskaan	Usein	Usein	Usein	Usein
35-44	Nainen	Alempi korkeakoulututkinto	4	2	Osa-aikainen	Suomi	2011	Varsinais-Suomi	Ei	Erikoissairaanhoidossa (esim. sairaalan neurologian poliklinikka)			MS-tauti hoitotasapainossa, arjen toimintakyky alentunut			1	0	5	3	2	6	En ollenkaan	Yli 7 päivää	Tyydyttävä	Hyvä	Ei	Kyllä, suurinpiirtein	Kyllä	Kyllä	Ei	Kyllä	Ei	Kyllä	Kyllä	Harvoin	Ei koskaan	En osaa sanoa	Harvoin	Aina	Harvoin	Usein	Usein	Aina	Usein	Joskus	Usein	Harvoin	Harvoin	Ei koskaan
35-44	Mies	Ylempi korkeakoulututkinto	4	2	Täysipäiväinen	Muu	2010	Vantaa-Kerava (ja HUS)	Ei	Erikoissairaanhoidossa (esim. sairaalan neurologian poliklinikka)			MS-tauti hoitotasapainossa, arjen toimintakyky alentunut			4	0	3	0	4	3	En ollenkaan	En ollenkaan	Kohtalainen	Tyydyttävä	Ei	Ei	Kyllä	Kyllä	Kyllä	Kyllä	Kyllä	Kyllä	Ei	Joskus	Ei koskaan	En osaa sanoa	Usein	Joskus	Usein	Aina	Joskus	Joskus	Usein	Harvoin	Joskus	Joskus	Usein	Harvoin
65-74	Nainen	Ylempi korkeakoulututkinto	2	0	Eläkkeellä (ml. työkyvyttömyyseläke)	Suomi	2000	Pohjois-Pohjanmaa	Ei	Erikoissairaanhoidossa (esim. sairaalan neurologian poliklinikka)		MS-tauti hoitotasapainossa, ei juuri toimintakykyhaittaa	MS-tauti hoitotasapainossa, arjen toimintakyky alentunut			1	0	3	0	3	3	En ollenkaan	En ollenkaan	Tyydyttävä	Hyvä	Kyllä, suurinpiirtein	Kyllä, varmasti	Kyllä	Kyllä	Ei	Kyllä	Ei	Ei	Ei	Ei koskaan	Ei koskaan	En osaa sanoa	Usein	Usein	Aina	Aina	Aina	Aina	Usein	Joskus	Usein	Aina	Aina	Aina
35-44	Nainen	Alempi korkeakoulututkinto	1 (Asun yksin)	0	Täysipäiväinen	Suomi	2007	Etelä-Pohjanmaa	Kyllä	Erikoissairaanhoidossa (esim. sairaalan neurologian poliklinikka)		MS-tauti hoitotasapainossa, ei juuri toimintakykyhaittaa				1	1	4	3	1	2	En ollenkaan	En ollenkaan	Hyvä	Hyvä	Kyllä, suurinpiirtein	Kyllä, suurinpiirtein	Kyllä	Kyllä	Kyllä	Kyllä	Kyllä	Kyllä	Ei	Ei koskaan	Ei koskaan	En osaa sanoa	Joskus	Aina	Joskus	Usein	Usein	Joskus	Aina	Harvoin	Joskus	Harvoin	Usein	Harvoin
55-64	Nainen	Ylempi korkeakoulututkinto	2	0	Täysipäiväinen	Suomi	2011	Etelä-Karjala	Ei	Erikoissairaanhoidossa (esim. sairaalan neurologian poliklinikka)		MS-tauti hoitotasapainossa, ei juuri toimintakykyhaittaa				3	0	0	3	2	4	En ollenkaan	En ollenkaan	Tyydyttävä	Hyvä	En osaa sanoa	Kyllä, suurinpiirtein	Kyllä	Kyllä	Ei	Kyllä	Ei	Kyllä	Kyllä	Harvoin	Ei koskaan	En osaa sanoa	Joskus	Usein	Joskus	Usein	Usein	Usein	Usein	Usein	Usein	Joskus	Joskus	Ei koskaan
55-64	Nainen	Opistoasteen tutkinto	2	0	Täysipäiväinen	Suomi	2006	Etelä-Savo	Kyllä	Perusterveydenhuollossa (esim. terveyskeskus tai - asema)		MS-tauti hoitotasapainossa, ei juuri toimintakykyhaittaa				1	1	5	10	2	10	En ollenkaan	En ollenkaan	Erinomainen	Hyvä	Ei	Kyllä, suurinpiirtein	Kyllä	En osaa sanoa	Kyllä	Kyllä	Ei	Ei	Ei	Ei koskaan	Ei koskaan	En osaa sanoa	Harvoin	Usein	Usein	Usein	Aina	Aina	Aina	Harvoin	Aina	Aina	Aina	Ei koskaan
55-64	Nainen	Ylempi korkeakoulututkinto	1 (Asun yksin)	0	Täysipäiväinen	Suomi	1997	Kymenlaakso	Kyllä	Erikoissairaanhoidossa (esim. sairaalan neurologian poliklinikka)			MS-tauti hoitotasapainossa, arjen toimintakyky alentunut			10	2	10	1	4	4	En ollenkaan	En ollenkaan	Tyydyttävä	Hyvä	Ei	Ei	Kyllä	Kyllä	Kyllä	Kyllä	Ei	Kyllä	Kyllä	Harvoin	En osaa sanoa	En osaa sanoa	Joskus	Usein	Joskus	Usein	Usein	Aina	Aina	Harvoin	Joskus	Ei koskaan	Harvoin	Harvoin
45-54	Mies	Alempi korkeakoulututkinto	4	2	Täysipäiväinen	Suomi	2020	Länsi-Uusimaa (ja HUS)	Ei	Erikoissairaanhoidossa (esim. sairaalan neurologian poliklinikka)			MS-tauti hoitotasapainossa, arjen toimintakyky alentunut			6	0	0	0	3	0	En ollenkaan	En ollenkaan	Kohtalainen	Tyydyttävä	Kyllä, suurinpiirtein	Kyllä, suurinpiirtein	Kyllä	Kyllä	Ei	Ei	Kyllä	Kyllä	Ei	Joskus	Ei koskaan	En osaa sanoa	Joskus	Usein	Joskus	Joskus	Joskus	Joskus	Usein	Joskus	Joskus	Joskus	Joskus	Usein
65-74	Nainen	Ylempi korkeakoulututkinto	2	0	Eläkkeellä (ml. työkyvyttömyyseläke)	Suomi	1987	Etelä-Karjala	Ei	Erikoissairaanhoidossa (esim. sairaalan neurologian poliklinikka)		MS-tauti hoitotasapainossa, ei juuri toimintakykyhaittaa				1	0	3	0	1	2	En ollenkaan	En ollenkaan	Hyvä	Hyvä	En osaa sanoa	Kyllä, suurinpiirtein	Kyllä	Kyllä	Ei	Kyllä	Ei	Ei	Ei	Ei koskaan	Ei koskaan	En osaa sanoa	Ei koskaan	Aina	Aina	Aina	Aina	Aina	Aina	Aina	Aina	Aina	Aina	Aina
55-64	Nainen	Toinen aste (Lukio tai ammattikoulu)	2	0	Eläkkeellä (ml. työkyvyttömyyseläke)	Suomi	2003	Helsinki (ja HUS)	Kyllä	Perusterveydenhuollossa (esim. terveyskeskus tai - asema)			MS-tauti hoitotasapainossa, arjen toimintakyky alentunut	MS-tauti ei hoitotasapainossa (esim. pahenemisvaihe)		2	0	8	4	3	4	En ollenkaan	En ollenkaan	Kohtalainen	Huono	Kyllä, varmasti	Kyllä, varmasti	Ei	Ei	Ei	En osaa sanoa	Kyllä	Kyllä	Ei	Ei koskaan	Ei koskaan	Ei koskaan	Aina	Aina	Joskus	Joskus	Joskus	Joskus	Harvoin	Harvoin	Harvoin	Harvoin	Harvoin	Harvoin
55-64	Nainen	Opistoasteen tutkinto	2	0	Eläkkeellä (ml. työkyvyttömyyseläke)	Suomi	2018	Kanta-Häme	Kyllä	Perusterveydenhuollossa (esim. terveyskeskus tai - asema)		MS-tauti hoitotasapainossa, ei juuri toimintakykyhaittaa				1	0	2	0	2	1	En ollenkaan	En ollenkaan	Hyvä	Hyvä	Kyllä, suurinpiirtein	Kyllä, suurinpiirtein	Kyllä	Kyllä	Ei	Kyllä	Ei	Ei	Kyllä	Ei koskaan	Ei koskaan	En osaa sanoa	Ei koskaan	Usein	En osaa sanoa	Usein	Usein	Usein	Usein	Ei koskaan	Usein	Usein	Joskus	Ei koskaan
55-64	Nainen	Opistoasteen tutkinto	2	0	Eläkkeellä (ml. työkyvyttömyyseläke)	Suomi	2013	Satakunta	Kyllä	Erikoissairaanhoidossa (esim. sairaalan neurologian poliklinikka)			MS-tauti hoitotasapainossa, arjen toimintakyky alentunut			4	0	12	2	2	7	En ollenkaan	En ollenkaan	Tyydyttävä	Hyvä	Kyllä, suurinpiirtein	Kyllä, suurinpiirtein	Ei	Ei	Ei	En osaa sanoa	Ei	Kyllä	Ei	Harvoin	Ei koskaan	En osaa sanoa	Joskus	Usein	Usein	Usein	Usein	Usein	Usein	Harvoin	Usein	Joskus	Usein	Harvoin
45-54	Nainen	Opistoasteen tutkinto	2	0	Eläkkeellä (ml. työkyvyttömyyseläke)	Suomi	2019	Keski-Suomi	Ei	Erikoissairaanhoidossa (esim. sairaalan neurologian poliklinikka)			MS-tauti hoitotasapainossa, arjen toimintakyky alentunut			5	2	2	2	3	2	En ollenkaan	En ollenkaan	Tyydyttävä	Erinomainen	En osaa sanoa	Kyllä, suurinpiirtein	Kyllä	Kyllä	Kyllä	Kyllä	En osaa sanoa	Kyllä	En osaa sanoa	Ei koskaan	Ei koskaan	En osaa sanoa	Joskus	Usein	Joskus	Usein	Usein	Aina	Aina	Ei koskaan	Usein	Usein	Harvoin	Aina
45-54	Nainen	Ylempi korkeakoulututkinto	2	0	Eläkkeellä (ml. työkyvyttömyyseläke)	Suomi	1993	Länsi-Uusimaa (ja HUS)	Ei	Perusterveydenhuollossa (esim. terveyskeskus tai - asema)			MS-tauti hoitotasapainossa, arjen toimintakyky alentunut			0	0	2	3	0	2	En ollenkaan	En ollenkaan	Kohtalainen	En osaa sanoa	Ei	Kyllä, suurinpiirtein	En osaa sanoa	En osaa sanoa	Ei	Ei	En osaa sanoa	Kyllä	Ei	En osaa sanoa	En osaa sanoa	En osaa sanoa	En osaa sanoa	En osaa sanoa	En osaa sanoa	En osaa sanoa	En osaa sanoa	En osaa sanoa	En osaa sanoa	En osaa sanoa	En osaa sanoa	En osaa sanoa	En osaa sanoa	Ei koskaan
55-64	Nainen	Opistoasteen tutkinto	2	0	Eläkkeellä (ml. työkyvyttömyyseläke)	Suomi	2019	Pirkanmaa	Ei	Erikoissairaanhoidossa (esim. sairaalan neurologian poliklinikka)			MS-tauti hoitotasapainossa, arjen toimintakyky alentunut			45	0	0	0	45	4	En ollenkaan	Alle 7 päivää	Tyydyttävä	Erinomainen	Kyllä, varmasti	Kyllä, varmasti	Kyllä	Kyllä	Kyllä	Kyllä	Ei	Ei	Kyllä	Harvoin	Ei koskaan	En osaa sanoa	Ei koskaan	Aina	Aina	Aina	Aina	Aina	Aina	Aina	Aina	Aina	Aina	Aina
65-74	Mies	Opistoasteen tutkinto	2	0	Eläkkeellä (ml. työkyvyttömyyseläke)	Suomi	2022	Kymenlaakso	Kyllä	Erikoissairaanhoidossa (esim. sairaalan neurologian poliklinikka)		MS-tauti hoitotasapainossa, ei juuri toimintakykyhaittaa				2	1	3	2	2	3	En ollenkaan	En ollenkaan	Hyvä	Erinomainen	Kyllä, varmasti	Ei	Kyllä	Kyllä	Kyllä	Kyllä	Ei	Ei	En osaa sanoa	Ei koskaan	Ei koskaan	En osaa sanoa	Ei koskaan	Aina	En osaa sanoa	Aina	Aina	Aina	Aina	En osaa sanoa	Aina	Aina	Aina	Ei koskaan
45-54	Nainen	Ylempi korkeakoulututkinto	2	0	Täysipäiväinen	Suomi	2007	Pirkanmaa	Ei	Erikoissairaanhoidossa (esim. sairaalan neurologian poliklinikka)		MS-tauti hoitotasapainossa, ei juuri toimintakykyhaittaa				0	1	0	2	1	2	En ollenkaan	En ollenkaan	Hyvä	Erinomainen	Ei	Ei	Ei	Kyllä	Kyllä	Kyllä	Ei	Kyllä	Ei	Ei koskaan	Ei koskaan	En osaa sanoa	Ei koskaan	Usein	Ei koskaan	Aina	Aina	Aina	Aina	Ei koskaan	En osaa sanoa	Aina	Aina	En osaa sanoa
55-64	Nainen	Tutkijakoulutus	2	0	Eläkkeellä (ml. työkyvyttömyyseläke)	Suomi	2005	Helsinki (ja HUS)	Kyllä	Perusterveydenhuollossa (esim. terveyskeskus tai - asema)			MS-tauti hoitotasapainossa, arjen toimintakyky alentunut			0	0	70	4	4	1	En ollenkaan	Yli 7 päivää	Huono	Tyydyttävä	Kyllä, suurinpiirtein	Kyllä, suurinpiirtein	Kyllä	Ei	Ei	Kyllä	Ei	Ei	Ei	Ei koskaan	Ei koskaan	En osaa sanoa	Usein	Usein	Ei koskaan	Usein	Aina	Usein	Usein	Ei koskaan	En osaa sanoa	Ei koskaan	Usein	Ei koskaan
55-64	Nainen	Opistoasteen tutkinto	1 (Asun yksin)	0	Eläkkeellä (ml. työkyvyttömyyseläke)	Suomi	2020	Helsinki (ja HUS)	Ei	Erikoissairaanhoidossa (esim. sairaalan neurologian poliklinikka)			MS-tauti hoitotasapainossa, arjen toimintakyky alentunut			2	0	2	0	1	4	En ollenkaan	En ollenkaan	Kohtalainen	Hyvä	En osaa sanoa	En osaa sanoa	Kyllä	Kyllä	Kyllä	Kyllä	Ei	Kyllä	En osaa sanoa	Ei koskaan	Ei koskaan	Ei koskaan	Harvoin	Aina	Harvoin	Aina	Aina	Aina	Aina	Harvoin	Aina	Harvoin	Aina	Harvoin
35-44	Nainen	Ylempi korkeakoulututkinto	2	0	Täysipäiväinen	Suomi	2009	Kymenlaakso	Ei	Erikoissairaanhoidossa (esim. sairaalan neurologian poliklinikka)			MS-tauti hoitotasapainossa, arjen toimintakyky alentunut			12	0	2	0	3	2	En ollenkaan	En ollenkaan	Tyydyttävä	Erinomainen	Kyllä, suurinpiirtein	Kyllä, varmasti	Kyllä	Kyllä	Kyllä	Kyllä	Ei	Ei	Ei	Ei koskaan	Ei koskaan	En osaa sanoa	Ei koskaan	Aina	Aina	Aina	Aina	Aina	Aina	Ei koskaan	En osaa sanoa	Joskus	Usein	Harvoin
35-44	Nainen	Ylempi korkeakoulututkinto	2	0	Täysipäiväinen	Suomi	2024	Varsinais-Suomi	En osaa sanoa	Erikoissairaanhoidossa (esim. sairaalan neurologian poliklinikka)	Uusi MS-tauti diagnoosi					4	1	8	5	3	6	En ollenkaan	En ollenkaan	Hyvä	Erinomainen	Kyllä, suurinpiirtein	Kyllä, suurinpiirtein	Kyllä	Kyllä	Kyllä	Kyllä	Kyllä	Kyllä	Ei	Ei koskaan	Ei koskaan	En osaa sanoa	Harvoin	Usein	Usein	Usein	Aina	Aina	Aina	En osaa sanoa	En osaa sanoa	En osaa sanoa	En osaa sanoa	Joskus
35-44	Nainen	Ylempi korkeakoulututkinto	4	2	Täysipäiväinen	Ruotsi	2012	Varsinais-Suomi	Ei	Erikoissairaanhoidossa (esim. sairaalan neurologian poliklinikka)		MS-tauti hoitotasapainossa, ei juuri toimintakykyhaittaa				3	1	20	5	2	4	En ollenkaan	En ollenkaan	Hyvä	Hyvä	Kyllä, suurinpiirtein	Kyllä, varmasti	Kyllä	Kyllä	Kyllä	Kyllä	Ei	Kyllä	En osaa sanoa	Ei koskaan	Ei koskaan	En osaa sanoa	Usein	Joskus	Joskus	Usein	Usein	Aina	Usein	Harvoin	Usein	Usein	Joskus	Joskus
35-44	Nainen	Alempi korkeakoulututkinto	1 (Asun yksin)	0	Työtön	Suomi	2018	Helsinki (ja HUS)	Ei	Erikoissairaanhoidossa (esim. sairaalan neurologian poliklinikka)		MS-tauti hoitotasapainossa, ei juuri toimintakykyhaittaa				1	0	2	2	1	2	En ollenkaan	En ollenkaan	Hyvä	Erinomainen	En osaa sanoa	En osaa sanoa	Kyllä	Kyllä	Ei	Kyllä	Ei	Ei	Ei	Harvoin	En osaa sanoa	En osaa sanoa	Usein	Aina	Aina	Aina	Aina	Aina	Aina	Aina	Aina	Aina	Aina	En osaa sanoa
25-34	Nainen	Toinen aste (Lukio tai ammattikoulu)	2	0	Työtön	Suomi	2018	Keski-Suomi	Ei	Erikoissairaanhoidossa (esim. sairaalan neurologian poliklinikka)		MS-tauti hoitotasapainossa, ei juuri toimintakykyhaittaa				1	0	20	0	2	3	En ollenkaan	En ollenkaan	Tyydyttävä	Tyydyttävä	Ei	Ei	Ei	Ei	Ei	En osaa sanoa	Kyllä	Kyllä	Ei	En osaa sanoa	Ei koskaan	En osaa sanoa	Usein	Joskus	Joskus	Joskus	Joskus	Joskus	Joskus	Harvoin	Harvoin	Ei koskaan	Harvoin	Ei koskaan
45-54	Nainen	Alempi korkeakoulututkinto	1 (Asun yksin)	0	Muu	Suomi	2014	Varsinais-Suomi	Ei	Erikoissairaanhoidossa (esim. sairaalan neurologian poliklinikka)		MS-tauti hoitotasapainossa, ei juuri toimintakykyhaittaa				1	1	0	0	1	0	En ollenkaan	En ollenkaan	Hyvä	Erinomainen	En osaa sanoa	En osaa sanoa	Kyllä	Kyllä	Kyllä	Kyllä	Ei	Ei	En osaa sanoa	En osaa sanoa	Ei koskaan	En osaa sanoa	En osaa sanoa	Aina	Aina	Usein	Usein	Usein	Aina	En osaa sanoa	Aina	En osaa sanoa	En osaa sanoa	En osaa sanoa
45-54	Nainen	Ylempi korkeakoulututkinto	2	0	Täysipäiväinen	Suomi	2019	Länsi-Uusimaa (ja HUS)	En osaa sanoa	Erikoissairaanhoidossa (esim. sairaalan neurologian poliklinikka)		MS-tauti hoitotasapainossa, ei juuri toimintakykyhaittaa				1	1	1	0	1	2	En ollenkaan	En ollenkaan	Hyvä	Tyydyttävä	Ei	Kyllä, varmasti	Kyllä	Ei	Ei	Ei	Ei	En osaa sanoa	Ei	Joskus	Ei koskaan	En osaa sanoa	Joskus	Usein	Joskus	Usein	Joskus	Joskus	Usein	Ei koskaan	Harvoin	Ei koskaan	Usein	Ei koskaan
55-64	Nainen	Ylempi korkeakoulututkinto	2	0	Eläkkeellä (ml. työkyvyttömyyseläke)	Suomi	2013	Pohjois-Karjala	Ei	Erikoissairaanhoidossa (esim. sairaalan neurologian poliklinikka)			MS-tauti hoitotasapainossa, arjen toimintakyky alentunut			40	0	2	0	1	1	En ollenkaan	En ollenkaan	Tyydyttävä	Kohtalainen	Kyllä, suurinpiirtein	Ei	Ei	Ei	Kyllä	Kyllä	Ei	Ei	Ei	Ei koskaan	Ei koskaan	Ei koskaan	Usein	Harvoin	Joskus	Harvoin	Joskus	Joskus	Usein	Harvoin	Harvoin	Harvoin	Harvoin	Harvoin
55-64	Mies	Peruskoulu	2	0	Eläkkeellä (ml. työkyvyttömyyseläke)	Suomi	2015	Helsinki (ja HUS)	Kyllä	En osaa sanoa			MS-tauti hoitotasapainossa, arjen toimintakyky alentunut			1	0	0	0	30	0	En ollenkaan	Yli 7 päivää	Huono	Hyvä	En osaa sanoa	Kyllä, suurinpiirtein	Ei	Ei	Kyllä	Ei	En osaa sanoa	Kyllä	Ei	En osaa sanoa	Ei koskaan	En osaa sanoa	Harvoin	Usein	Harvoin	Usein	Usein	En osaa sanoa	Usein	Ei koskaan	Harvoin	En osaa sanoa	Harvoin	Harvoin
45-54	Mies	Toinen aste (Lukio tai ammattikoulu)	2	0	Täysipäiväinen	Suomi	2022	Varsinais-Suomi	Ei	Erikoissairaanhoidossa (esim. sairaalan neurologian poliklinikka)			MS-tauti hoitotasapainossa, arjen toimintakyky alentunut			5	0	0	0	3	0	En ollenkaan	En ollenkaan	Tyydyttävä	Erinomainen	En osaa sanoa	En osaa sanoa	Kyllä	Kyllä	Kyllä	Kyllä	Ei	Ei	Kyllä	Ei koskaan	Ei koskaan	En osaa sanoa	Ei koskaan	Aina	Aina	Aina	Aina	Aina	Aina	Aina	Aina	Aina	Aina	En osaa sanoa
45-54	Nainen	Peruskoulu	2	0	Eläkkeellä (ml. työkyvyttömyyseläke)	Suomi	2018	Vantaa-Kerava (ja HUS)	Ei	Erikoissairaanhoidossa (esim. sairaalan neurologian poliklinikka)		MS-tauti hoitotasapainossa, ei juuri toimintakykyhaittaa				1	3	1	0	0	1	En ollenkaan	En ollenkaan	Kohtalainen	Hyvä	Kyllä, suurinpiirtein	Kyllä, suurinpiirtein	Kyllä	Kyllä	Ei	Ei	Kyllä	Kyllä	Ei	Harvoin	Ei koskaan	Aina	Usein	En osaa sanoa	Harvoin	Joskus	Joskus	Usein	Harvoin	Harvoin	Harvoin	Harvoin	En osaa sanoa	En osaa sanoa
45-54	Mies	Alempi korkeakoulututkinto	4	2	Täysipäiväinen	Suomi	2009	Etelä-Pohjanmaa	Kyllä	Erikoissairaanhoidossa (esim. sairaalan neurologian poliklinikka)			MS-tauti hoitotasapainossa, arjen toimintakyky alentunut	MS-tauti ei hoitotasapainossa (esim. pahenemisvaihe)		4	0	7	0	2	3	En ollenkaan	En ollenkaan	Tyydyttävä	Hyvä	Kyllä, suurinpiirtein	Kyllä, suurinpiirtein	Kyllä	Kyllä	Kyllä	Ei	Kyllä	Kyllä	Ei	Harvoin	Ei koskaan	En osaa sanoa	Joskus	Usein	Joskus	Usein	Usein	Usein	Usein	Harvoin	Joskus	Joskus	Joskus	Ei koskaan
55-64	Nainen	Ylempi korkeakoulututkinto	2	0	Eläkkeellä (ml. työkyvyttömyyseläke)	Suomi	1997	Pohjois-Pohjanmaa	Ei	Erikoissairaanhoidossa (esim. sairaalan neurologian poliklinikka)				MS-tauti ei hoitotasapainossa (esim. pahenemisvaihe)		6	0	4	2	2	4	En ollenkaan	En ollenkaan	Tyydyttävä	Hyvä	En osaa sanoa	Kyllä, suurinpiirtein	Kyllä	Ei	Ei	Kyllä	Ei	Kyllä	Kyllä	Ei koskaan	Ei koskaan	En osaa sanoa	Ei koskaan	Aina	Harvoin	Aina	Aina	Aina	Aina	Harvoin	Usein	Harvoin	Usein	Harvoin
55-64	Nainen	Opistoasteen tutkinto	1 (Asun yksin)	0	Eläkkeellä (ml. työkyvyttömyyseläke)	Suomi	2010	Varsinais-Suomi	Kyllä	Erikoissairaanhoidossa (esim. sairaalan neurologian poliklinikka)			MS-tauti hoitotasapainossa, arjen toimintakyky alentunut			6	0	7	0	2	5	En ollenkaan	En ollenkaan	Tyydyttävä	Hyvä	Kyllä, suurinpiirtein	Kyllä, suurinpiirtein	Kyllä	Ei	Kyllä	Kyllä	Ei	Ei	Kyllä	Ei koskaan	Ei koskaan	En osaa sanoa	Ei koskaan	Aina	Aina	Aina	Aina	Aina	Aina	Usein	Aina	Aina	Usein	Usein
35-44	Nainen	Opistoasteen tutkinto	1 (Asun yksin)	0	Eläkkeellä (ml. työkyvyttömyyseläke)	Suomi	2003	Lappi	Kyllä	Erikoissairaanhoidossa (esim. sairaalan neurologian poliklinikka)			MS-tauti hoitotasapainossa, arjen toimintakyky alentunut			70	25	0	1	10 - 15	0	En ollenkaan	En ollenkaan	Tyydyttävä	Hyvä	Kyllä, suurinpiirtein	Kyllä, suurinpiirtein	Kyllä	En osaa sanoa	Kyllä	Kyllä	Ei	Ei	Ei	Joskus	Ei koskaan	Ei koskaan	Joskus	Harvoin	Ei koskaan	Usein	Usein	Joskus	Joskus	Ei koskaan	Ei koskaan	Ei koskaan	Ei koskaan	En osaa sanoa
55-64	Nainen	Opistoasteen tutkinto	2	0	Eläkkeellä (ml. työkyvyttömyyseläke)	Suomi	2001	Keski-Uusimaa (ja HUS)	Kyllä	Perusterveydenhuollossa (esim. terveyskeskus tai - asema)			MS-tauti hoitotasapainossa, arjen toimintakyky alentunut			1	0	2	1	0	7	En ollenkaan	En ollenkaan	Tyydyttävä	Tyydyttävä	En osaa sanoa	En osaa sanoa	Ei	Ei	Ei	Kyllä	En osaa sanoa	En osaa sanoa	Ei	En osaa sanoa	Ei koskaan	En osaa sanoa	Joskus	En osaa sanoa	En osaa sanoa	En osaa sanoa	Harvoin	En osaa sanoa	En osaa sanoa	En osaa sanoa	En osaa sanoa	En osaa sanoa	En osaa sanoa	En osaa sanoa
55-64	Mies	Opistoasteen tutkinto	3	0	Eläkkeellä (ml. työkyvyttömyyseläke)	Suomi	2005	Helsinki (ja HUS)	Kyllä	Perusterveydenhuollossa (esim. terveyskeskus tai - asema)			MS-tauti hoitotasapainossa, arjen toimintakyky alentunut			1	0	40	0	1	42	En ollenkaan	En halua sanoa	Kohtalainen	Erinomainen	Kyllä, suurinpiirtein	Kyllä, varmasti	Kyllä	Kyllä	Kyllä	Kyllä	Ei	Kyllä	En osaa sanoa	Ei koskaan	Ei koskaan	En osaa sanoa	Ei koskaan	Usein	En osaa sanoa	Usein	Aina	Usein	Aina	En osaa sanoa	Usein	Usein	Aina	Joskus
45-54	Nainen	Alempi korkeakoulututkinto	2	0	Täysipäiväinen	Suomi	2001	Helsinki (ja HUS)	Ei	Erikoissairaanhoidossa (esim. sairaalan neurologian poliklinikka)		MS-tauti hoitotasapainossa, ei juuri toimintakykyhaittaa				1	0	10	10	2	24	En ollenkaan	En ollenkaan	Tyydyttävä	Hyvä	Ei	Ei	En osaa sanoa	Kyllä	Kyllä	Kyllä	Ei	Ei	Ei	Ei koskaan	Ei koskaan	En osaa sanoa	Joskus	Usein	Harvoin	Aina	Aina	Aina	Aina	Ei koskaan	Joskus	Ei koskaan	En osaa sanoa	Ei koskaan
25-34	Nainen	Ylempi korkeakoulututkinto	1 (Asun yksin)	0	Täysipäiväinen	Suomi	2011	Satakunta	Ei	Erikoissairaanhoidossa (esim. sairaalan neurologian poliklinikka)				MS-tauti ei hoitotasapainossa (esim. pahenemisvaihe)		2	0	5	1	2	6	Alle 7 päivää	En ollenkaan	Tyydyttävä	Kohtalainen	Kyllä, suurinpiirtein	Kyllä, suurinpiirtein	Kyllä	Ei	Ei	En osaa sanoa	Kyllä	Kyllä	Ei	Ei koskaan	Ei koskaan	Ei koskaan	Joskus	Joskus	Joskus	Aina	Usein	Usein	Aina	Joskus	Usein	Joskus	Joskus	Harvoin
35-44	Nainen	Alempi korkeakoulututkinto	5 tai enemmän	3	Osa-aikainen	Suomi	2019	Pohjois-Pohjanmaa	Ei	Erikoissairaanhoidossa (esim. sairaalan neurologian poliklinikka)				MS-tauti ei hoitotasapainossa (esim. pahenemisvaihe)		1	3	8	3	3	5	En ollenkaan	En ollenkaan	Hyvä	Hyvä	Kyllä, suurinpiirtein	Kyllä, suurinpiirtein	Kyllä	Kyllä	Kyllä	Kyllä	Ei	Kyllä	Kyllä	Ei koskaan	Ei koskaan	En osaa sanoa	Joskus	Usein	Usein	Usein	Usein	Usein	Usein	Joskus	Joskus	Joskus	En osaa sanoa	En osaa sanoa
45-54	Nainen	Alempi korkeakoulututkinto	4	2	Osa-aikainen	Suomi	2004	Helsinki (ja HUS)	Ei	Erikoissairaanhoidossa (esim. sairaalan neurologian poliklinikka)		MS-tauti hoitotasapainossa, ei juuri toimintakykyhaittaa				1	0	1	0	1	1	En ollenkaan	En ollenkaan	Hyvä	Hyvä	En osaa sanoa	En osaa sanoa	En osaa sanoa	Kyllä	Ei	Kyllä	Ei	Ei	Ei	Ei koskaan	Ei koskaan	En osaa sanoa	Joskus	Aina	Aina	Aina	Aina	Aina	Aina	Harvoin	Usein	Usein	Usein	Harvoin
55-64	Nainen	En halua sanoa	3	0	Täysipäiväinen	Suomi	2006	Varsinais-Suomi	Ei	Erikoissairaanhoidossa (esim. sairaalan neurologian poliklinikka)			MS-tauti hoitotasapainossa, arjen toimintakyky alentunut			4	0	2	0	5	3	En ollenkaan	En ollenkaan	Kohtalainen	Erinomainen	Ei	Kyllä, suurinpiirtein	Kyllä	Ei	Kyllä	Ei	Kyllä	Kyllä	Ei	En osaa sanoa	En osaa sanoa	En osaa sanoa	Aina	Usein	Usein	Harvoin	Joskus	Harvoin	Harvoin	Ei koskaan	Usein	Ei koskaan	Aina	Ei koskaan
35-44	Nainen	Toinen aste (Lukio tai ammattikoulu)	2	0	Täysipäiväinen	Suomi	2012	Varsinais-Suomi	Kyllä	Erikoissairaanhoidossa (esim. sairaalan neurologian poliklinikka)					En halua sanoa	8	0	6	0	5	6	En ollenkaan	Alle 7 päivää	Tyydyttävä	Tyydyttävä	Ei	Kyllä, suurinpiirtein	Kyllä	Ei	Ei	En osaa sanoa	Kyllä	Ei	En osaa sanoa	Harvoin	Ei koskaan	En osaa sanoa	Aina	Usein	Harvoin	Joskus	Harvoin	Joskus	Harvoin	Ei koskaan	Harvoin	Harvoin	Harvoin	Ei koskaan
55-64	Nainen	Toinen aste (Lukio tai ammattikoulu)	2	0	Eläkkeellä (ml. työkyvyttömyyseläke)	Suomi	2007	Satakunta	Kyllä	Erikoissairaanhoidossa (esim. sairaalan neurologian poliklinikka)			MS-tauti hoitotasapainossa, arjen toimintakyky alentunut			0	0	4	0	1	3	En ollenkaan	Yli 7 päivää	Huono	Huono	En osaa sanoa	Kyllä, suurinpiirtein	Kyllä	Ei	Ei	En osaa sanoa	Kyllä	En osaa sanoa	Ei	Joskus	Ei koskaan	Ei koskaan	Aina	Harvoin	Ei koskaan	Ei koskaan	Ei koskaan	Harvoin	Joskus	Joskus	Ei koskaan	Ei koskaan	Ei koskaan	Ei koskaan
55-64	Nainen	Ylempi korkeakoulututkinto	2	0	Eläkkeellä (ml. työkyvyttömyyseläke)	Suomi	1998	Länsi-Uusimaa (ja HUS)	Ei	Yksityisellä poliklinikalla (esim. yksityinen neurologi)			MS-tauti hoitotasapainossa, arjen toimintakyky alentunut			0	0	1	0	0	1	En ollenkaan	En ollenkaan	Hyvä	En osaa sanoa	Ei	Kyllä, suurinpiirtein	Ei	Ei	Ei	Kyllä	Ei	Ei	Ei	En osaa sanoa	En osaa sanoa	En osaa sanoa	En osaa sanoa	En osaa sanoa	En osaa sanoa	En osaa sanoa	En osaa sanoa	En osaa sanoa	En osaa sanoa	En osaa sanoa	En osaa sanoa	En osaa sanoa	En osaa sanoa	En osaa sanoa
55-64	Nainen	Alempi korkeakoulututkinto	2	0	Eläkkeellä (ml. työkyvyttömyyseläke)	Suomi	2018	Pirkanmaa	Kyllä	Erikoissairaanhoidossa (esim. sairaalan neurologian poliklinikka)			MS-tauti hoitotasapainossa, arjen toimintakyky alentunut			1	0	4	0	2	0	En ollenkaan	En ollenkaan	Hyvä	Erinomainen	Kyllä, suurinpiirtein	Kyllä, varmasti	En osaa sanoa	En osaa sanoa	Kyllä	Kyllä	Ei	Ei	Ei	Ei koskaan	Ei koskaan	En osaa sanoa	Joskus	Aina	Joskus	Aina	Aina	Aina	Aina	En osaa sanoa	Aina	En osaa sanoa	Aina	Usein
65-74	Mies	Ylempi korkeakoulututkinto	1 (Asun yksin)	0	Eläkkeellä (ml. työkyvyttömyyseläke)	Suomi	2015	Pohjois-Karjala	Ei	Erikoissairaanhoidossa (esim. sairaalan neurologian poliklinikka)			MS-tauti hoitotasapainossa, arjen toimintakyky alentunut			1	0	2	0	1	1	En ollenkaan	Yli 7 päivää	Hyvä	Hyvä	Kyllä, suurinpiirtein	Kyllä, varmasti	Kyllä	Ei	Ei	Kyllä	Ei	Ei	Ei	Ei koskaan	Ei koskaan	En osaa sanoa	Joskus	Usein	Harvoin	Aina	Usein	Usein	Usein	Ei koskaan	Usein	Usein	Joskus	Usein
35-44	Nainen	Ylempi korkeakoulututkinto	3	1	Täysipäiväinen	Suomi	2012	Varsinais-Suomi	Ei	Erikoissairaanhoidossa (esim. sairaalan neurologian poliklinikka)		MS-tauti hoitotasapainossa, ei juuri toimintakykyhaittaa				1	2	3	1	2	5	En ollenkaan	En ollenkaan	Hyvä	Erinomainen	Kyllä, suurinpiirtein	Kyllä, suurinpiirtein	Kyllä	Kyllä	Kyllä	Kyllä	Ei	Ei	Ei	Harvoin	Ei koskaan	En osaa sanoa	Joskus	Aina	Aina	Usein	Usein	Aina	Usein	Usein	Usein	Usein	Aina	Usein
55-64	Mies	Toinen aste (Lukio tai ammattikoulu)	2	0	Eläkkeellä (ml. työkyvyttömyyseläke)	Suomi	2007	Pirkanmaa	Kyllä	Perusterveydenhuollossa (esim. terveyskeskus tai - asema)			MS-tauti hoitotasapainossa, arjen toimintakyky alentunut			40	0	4	3	1	3	En ollenkaan	Yli 7 päivää	Kohtalainen	Kohtalainen	Ei	Ei	Ei	Ei	Ei	Kyllä	Ei	Kyllä	Ei	Harvoin	Ei koskaan	Ei koskaan	Joskus	Usein	Joskus	Usein	Usein	Usein	Usein	Joskus	Usein	Usein	Joskus	Harvoin
45-54	Nainen	Opistoasteen tutkinto	1 (Asun yksin)	0	Eläkkeellä (ml. työkyvyttömyyseläke)	Suomi	2021	Etelä-Pohjanmaa	Kyllä	Erikoissairaanhoidossa (esim. sairaalan neurologian poliklinikka)			MS-tauti hoitotasapainossa, arjen toimintakyky alentunut			30	10	10	3	6	5	Alle 7 päivää	Yli 7 päivää	Huono	Huono	Ei	Ei	Kyllä	Kyllä	Kyllä	Ei	Kyllä	Kyllä	Ei	Usein	Ei koskaan	En osaa sanoa	Aina	Ei koskaan	Ei koskaan	Ei koskaan	Ei koskaan	Ei koskaan	Ei koskaan	Ei koskaan	Ei koskaan	Ei koskaan	Ei koskaan	Ei koskaan
75 tai vanhempi	Nainen	Ylempi korkeakoulututkinto	2	0	Eläkkeellä (ml. työkyvyttömyyseläke)	Suomi	2012	Länsi-Uusimaa (ja HUS)	Kyllä	Perusterveydenhuollossa (esim. terveyskeskus tai - asema)			MS-tauti hoitotasapainossa, arjen toimintakyky alentunut			1	0	4	3	1	2	En ollenkaan	En ollenkaan	Kohtalainen	Huono	En osaa sanoa	Kyllä, suurinpiirtein	En osaa sanoa	Ei	Ei	En osaa sanoa	Kyllä	En osaa sanoa	Ei	En osaa sanoa	Ei koskaan	En osaa sanoa	Joskus	En osaa sanoa	Ei koskaan	En osaa sanoa	Ei koskaan	En osaa sanoa	En osaa sanoa	Joskus	Harvoin	En osaa sanoa	En osaa sanoa	Ei koskaan
35-44	Mies	Peruskoulu	1 (Asun yksin)	0	Eläkkeellä (ml. työkyvyttömyyseläke)	Suomi	2014	Varsinais-Suomi	Ei	Erikoissairaanhoidossa (esim. sairaalan neurologian poliklinikka)			MS-tauti hoitotasapainossa, arjen toimintakyky alentunut			50	1	1	0	2	1	En ollenkaan	En ollenkaan	Huono	Erinomainen	Kyllä, varmasti	Kyllä, varmasti	Kyllä	Kyllä	Kyllä	Kyllä	Ei	Ei	Ei	Ei koskaan	Ei koskaan	En osaa sanoa	Joskus	Aina	Aina	Usein	Usein	Usein	Aina	Harvoin	Aina	Aina	Aina	Aina
55-64	Mies	Alempi korkeakoulututkinto	1 (Asun yksin)	0	Osa-aikainen	Suomi	2017	Varsinais-Suomi	Kyllä	Erikoissairaanhoidossa (esim. sairaalan neurologian poliklinikka)		MS-tauti hoitotasapainossa, ei juuri toimintakykyhaittaa				3	2	6	2	3	6	En ollenkaan	En ollenkaan	Tyydyttävä	Hyvä	Ei	Ei	Kyllä	Kyllä	Kyllä	Kyllä	Ei	Kyllä	En osaa sanoa	Ei koskaan	Ei koskaan	En osaa sanoa	Joskus	Usein	Joskus	Usein	Aina	Aina	Aina	En osaa sanoa	Usein	Harvoin	Usein	Harvoin
35-44	Nainen	Toinen aste (Lukio tai ammattikoulu)	2	0	Eläkkeellä (ml. työkyvyttömyyseläke)	Suomi	2007	Etelä-Pohjanmaa	Ei	Erikoissairaanhoidossa (esim. sairaalan neurologian poliklinikka)		MS-tauti hoitotasapainossa, ei juuri toimintakykyhaittaa				13	0	5	2	3	2	En ollenkaan	En ollenkaan	Tyydyttävä	Erinomainen	Kyllä, suurinpiirtein	Kyllä, varmasti	Kyllä	Kyllä	Kyllä	Kyllä	Ei	Ei	Kyllä	Ei koskaan	Ei koskaan	En osaa sanoa	Ei koskaan	Usein	Usein	Aina	Aina	Aina	Aina	En osaa sanoa	Aina	Usein	En osaa sanoa	Usein
65-74	Nainen	Toinen aste (Lukio tai ammattikoulu)	3	0	Eläkkeellä (ml. työkyvyttömyyseläke)	Suomi	2008	Varsinais-Suomi	Kyllä	En osaa sanoa			MS-tauti hoitotasapainossa, arjen toimintakyky alentunut			0	0	3	4	0	6	En ollenkaan	En ollenkaan	Kohtalainen	Hyvä	En osaa sanoa	Kyllä, varmasti	Ei	Kyllä	Ei	En osaa sanoa	En osaa sanoa	Ei	Ei	En osaa sanoa	En osaa sanoa	En osaa sanoa	En osaa sanoa	En osaa sanoa	En osaa sanoa	En osaa sanoa	En osaa sanoa	En osaa sanoa	En osaa sanoa	En osaa sanoa	En osaa sanoa	En osaa sanoa	En osaa sanoa	En osaa sanoa
45-54	Nainen	Ylempi korkeakoulututkinto	2	1	Eläkkeellä (ml. työkyvyttömyyseläke)	Suomi	1994	Keski-Suomi	Kyllä	Erikoissairaanhoidossa (esim. sairaalan neurologian poliklinikka)		MS-tauti hoitotasapainossa, ei juuri toimintakykyhaittaa				2	0	0	0	3	0	En ollenkaan	En ollenkaan	Tyydyttävä	Hyvä	Kyllä, suurinpiirtein	Kyllä, suurinpiirtein	Kyllä	Kyllä	Kyllä	Kyllä	En osaa sanoa	Ei	Kyllä	Ei koskaan	Ei koskaan	Ei koskaan	Ei koskaan	Aina	Usein	Aina	Aina	Aina	Aina	Usein	Aina	Aina	Aina	Aina
45-54	Nainen	Opistoasteen tutkinto	3	1	Täysipäiväinen	Suomi	1996	Pohjois-Savo	Kyllä	Erikoissairaanhoidossa (esim. sairaalan neurologian poliklinikka)		MS-tauti hoitotasapainossa, ei juuri toimintakykyhaittaa				1	3	3	1	0	2	En ollenkaan	En ollenkaan	Erinomainen	Hyvä	Kyllä, suurinpiirtein	Kyllä, varmasti	Kyllä	Ei	Ei	Kyllä	Ei	Ei	Kyllä	Ei koskaan	Ei koskaan	Ei koskaan	Harvoin	Usein	Aina	Aina	Aina	Aina	Aina	Usein	Usein	Usein	Usein	Harvoin
45-54	Nainen	Opistoasteen tutkinto	3	0	Täysipäiväinen	Suomi	2007	Pirkanmaa	Kyllä	Erikoissairaanhoidossa (esim. sairaalan neurologian poliklinikka)		MS-tauti hoitotasapainossa, ei juuri toimintakykyhaittaa				0	2	1	2	2	3	En ollenkaan	En ollenkaan	Hyvä	Hyvä	Ei	Kyllä, suurinpiirtein	En osaa sanoa	Kyllä	Kyllä	Kyllä	Ei	Ei	Ei	Harvoin	Ei koskaan	En osaa sanoa	Ei koskaan	Usein	Joskus	Usein	Usein	Usein	Usein	Harvoin	Usein	Joskus	Usein	Usein
65-74	Nainen	En halua sanoa	1 (Asun yksin)	0	Eläkkeellä (ml. työkyvyttömyyseläke)	Suomi	1995	Etelä-Savo	Kyllä	Erikoissairaanhoidossa (esim. sairaalan neurologian poliklinikka)			MS-tauti hoitotasapainossa, arjen toimintakyky alentunut			1	0	20	0	3	6	En ollenkaan	Yli 7 päivää	Huono	Tyydyttävä	Ei	Ei	Kyllä	Ei	Ei	En osaa sanoa	Kyllä	Kyllä	Ei	Joskus	Ei koskaan	En osaa sanoa	Aina	Harvoin	Usein	Joskus	Joskus	Joskus	Joskus	Ei koskaan	Harvoin	Joskus	En osaa sanoa	Harvoin
45-54	Nainen	Alempi korkeakoulututkinto	4	1	Täysipäiväinen	Suomi	2011	Helsinki (ja HUS)	Ei	Erikoissairaanhoidossa (esim. sairaalan neurologian poliklinikka)		MS-tauti hoitotasapainossa, ei juuri toimintakykyhaittaa				1	0	4	5	3	5	En ollenkaan	En ollenkaan	Hyvä	Erinomainen	Kyllä, suurinpiirtein	Ei	Ei	Kyllä	Kyllä	Kyllä	Ei	Kyllä	Kyllä	Joskus	Ei koskaan	Ei koskaan	Ei koskaan	Aina	Aina	Aina	Aina	Aina	Aina	Ei koskaan	Aina	Usein	Usein	Aina
55-64	Nainen	Toinen aste (Lukio tai ammattikoulu)	2	0	Eläkkeellä (ml. työkyvyttömyyseläke)	Suomi	2021	Päijät-Häme	Ei	Erikoissairaanhoidossa (esim. sairaalan neurologian poliklinikka)		MS-tauti hoitotasapainossa, ei juuri toimintakykyhaittaa				2	0	1	0	2	0	En ollenkaan	En ollenkaan	Tyydyttävä	Hyvä	Kyllä, varmasti	Kyllä, varmasti	Kyllä	Kyllä	Kyllä	Kyllä	Ei	Ei	En osaa sanoa	Ei koskaan	Ei koskaan	En osaa sanoa	Ei koskaan	Aina	Aina	Aina	Aina	Aina	Aina	Aina	Aina	Aina	Aina	Aina
55-64	Nainen	En halua sanoa	2	0	Muu	Suomi	2021	Pohjois-Savo	Kyllä	Erikoissairaanhoidossa (esim. sairaalan neurologian poliklinikka)			MS-tauti hoitotasapainossa, arjen toimintakyky alentunut			6	0	2	0	5	2	En ollenkaan	En ollenkaan	Kohtalainen	Hyvä	Kyllä, suurinpiirtein	Kyllä, varmasti	Kyllä	Ei	Ei	Kyllä	Ei	Kyllä	Kyllä	Ei koskaan	En osaa sanoa	En osaa sanoa	Joskus	Usein	Aina	Usein	Usein	Usein	Aina	Ei koskaan	Usein	Usein	Joskus	Joskus
35-44	Nainen	Toinen aste (Lukio tai ammattikoulu)	2	0	Eläkkeellä (ml. työkyvyttömyyseläke)	Suomi	2004	Länsi-Uusimaa (ja HUS)	Ei	Erikoissairaanhoidossa (esim. sairaalan neurologian poliklinikka)				MS-tauti ei hoitotasapainossa (esim. pahenemisvaihe)		20	4	0	0	7	2	Alle 7 päivää	En ollenkaan	Huono	Kohtalainen	Ei	Kyllä, varmasti	Kyllä	Kyllä	Ei	Kyllä	Kyllä	Kyllä	Ei	Ei koskaan	Ei koskaan	En osaa sanoa	Aina	Joskus	Harvoin	Usein	Joskus	Harvoin	Aina	Ei koskaan	Harvoin	Joskus	Ei koskaan	Ei koskaan
45-54	Nainen	Alempi korkeakoulututkinto	1 (Asun yksin)	0	Työtön	Suomi	2001	Kanta-Häme	Ei	Erikoissairaanhoidossa (esim. sairaalan neurologian poliklinikka)			MS-tauti hoitotasapainossa, arjen toimintakyky alentunut			3	0	1	0	1	1	En ollenkaan	En ollenkaan	Tyydyttävä	Hyvä	Kyllä, suurinpiirtein	Kyllä, varmasti	Kyllä	En osaa sanoa	Kyllä	Kyllä	Ei	Kyllä	Kyllä	Ei koskaan	Ei koskaan	En osaa sanoa	Ei koskaan	Aina	Aina	Aina	Aina	Aina	Aina	Aina	Aina	Aina	Aina	Aina
65-74	Mies	Alempi korkeakoulututkinto	2	0	Eläkkeellä (ml. työkyvyttömyyseläke)	Suomi	1989	Pirkanmaa	Kyllä	En osaa sanoa		MS-tauti hoitotasapainossa, ei juuri toimintakykyhaittaa				2	0	25	10	0	10	En ollenkaan	En ollenkaan	Kohtalainen	Kohtalainen	En osaa sanoa	Kyllä, suurinpiirtein	Kyllä	Kyllä	Ei	Ei	Kyllä	Kyllä	Ei	Ei koskaan	Ei koskaan	Ei koskaan	Usein	Joskus	Joskus	Joskus	Harvoin	Harvoin	Harvoin	Harvoin	Harvoin	Harvoin	Harvoin	Ei koskaan
65-74	Nainen	Peruskoulu	2	0	Eläkkeellä (ml. työkyvyttömyyseläke)	Suomi	2004	Länsi-Uusimaa (ja HUS)	Kyllä	En osaa sanoa			MS-tauti hoitotasapainossa, arjen toimintakyky alentunut			10	0	1	1	10	10	En ollenkaan	En ollenkaan	Huono	Huono	Ei	Kyllä, varmasti	Kyllä	Ei	Ei	Ei	Ei	Kyllä	Ei	En osaa sanoa	En osaa sanoa	En osaa sanoa	En osaa sanoa	En osaa sanoa	En osaa sanoa	En osaa sanoa	En osaa sanoa	En osaa sanoa	En osaa sanoa	En osaa sanoa	En osaa sanoa	En osaa sanoa	En osaa sanoa	En osaa sanoa
35-44	Nainen	Alempi korkeakoulututkinto	1 (Asun yksin)	0	Täysipäiväinen	Suomi	2018	Vantaa-Kerava (ja HUS)	Ei	Erikoissairaanhoidossa (esim. sairaalan neurologian poliklinikka)		MS-tauti hoitotasapainossa, ei juuri toimintakykyhaittaa				1	0	1	0	1	1	En ollenkaan	En ollenkaan	Hyvä	Erinomainen	Kyllä, suurinpiirtein	Kyllä, varmasti	Kyllä	Kyllä	Kyllä	Kyllä	Ei	Kyllä	Ei	Ei koskaan	Ei koskaan	En osaa sanoa	Usein	Joskus	Usein	Harvoin	Joskus	Joskus	Aina	Ei koskaan	Harvoin	Ei koskaan	Joskus	Ei koskaan
45-54	Nainen	Ylempi korkeakoulututkinto	3	0	Täysipäiväinen	Suomi	2021	Vantaa-Kerava (ja HUS)	Kyllä	Erikoissairaanhoidossa (esim. sairaalan neurologian poliklinikka)			MS-tauti hoitotasapainossa, arjen toimintakyky alentunut			9	1	12	3	4	10	En ollenkaan	En ollenkaan	Tyydyttävä	Hyvä	Kyllä, suurinpiirtein	Kyllä, suurinpiirtein	Kyllä	Kyllä	Kyllä	En osaa sanoa	Kyllä	Kyllä	Ei	Joskus	En osaa sanoa	En osaa sanoa	Joskus	Usein	Joskus	Joskus	Joskus	Aina	Usein	Ei koskaan	En osaa sanoa	Ei koskaan	En osaa sanoa	Ei koskaan
65-74	Nainen	Alempi korkeakoulututkinto	2	0	Eläkkeellä (ml. työkyvyttömyyseläke)	Suomi	2002	Pirkanmaa	Ei	Perusterveydenhuollossa (esim. terveyskeskus tai - asema)				MS-tauti ei hoitotasapainossa (esim. pahenemisvaihe)		50	3	4	10	4	2	En ollenkaan	Yli 7 päivää	Tyydyttävä	Hyvä	Kyllä, suurinpiirtein	Kyllä, suurinpiirtein	Kyllä	En osaa sanoa	En osaa sanoa	Kyllä	Kyllä	En osaa sanoa	En osaa sanoa	Ei koskaan	Ei koskaan	Ei koskaan	En osaa sanoa	Ei koskaan	Harvoin	Usein	En osaa sanoa	Harvoin	Harvoin	En osaa sanoa	Harvoin	Harvoin	En osaa sanoa	Ei koskaan
35-44	Mies	Ylempi korkeakoulututkinto	2	0	Eläkkeellä (ml. työkyvyttömyyseläke)	Suomi	2020	Kymenlaakso	Kyllä	Erikoissairaanhoidossa (esim. sairaalan neurologian poliklinikka)			MS-tauti hoitotasapainossa, arjen toimintakyky alentunut			100	0	50	0	20	15	En ollenkaan	En ollenkaan	Hyvä	Hyvä	Kyllä, suurinpiirtein	Kyllä, suurinpiirtein	En osaa sanoa	Kyllä	Ei	Kyllä	Kyllä	Kyllä	Kyllä	Harvoin	Ei koskaan	En osaa sanoa	Joskus	Usein	Joskus	Usein	Usein	Usein	Usein	Harvoin	Usein	Harvoin	Usein	Harvoin
65-74	Nainen	Ylempi korkeakoulututkinto	2	0	Eläkkeellä (ml. työkyvyttömyyseläke)	Suomi	2014	Keski-Uusimaa (ja HUS)	Kyllä	Erikoissairaanhoidossa (esim. sairaalan neurologian poliklinikka)		MS-tauti hoitotasapainossa, ei juuri toimintakykyhaittaa				1	0	4	1	1	1	En ollenkaan	En ollenkaan	Hyvä	Erinomainen	En osaa sanoa	Kyllä, varmasti	Kyllä	Kyllä	Ei	Kyllä	Ei	Ei	Kyllä	En osaa sanoa	En osaa sanoa	En osaa sanoa	Ei koskaan	Aina	Usein	Aina	Aina	Aina	Aina	Joskus	Aina	Usein	Aina	En osaa sanoa
65-74	Nainen	Opistoasteen tutkinto	1 (Asun yksin)	0	Eläkkeellä (ml. työkyvyttömyyseläke)	Suomi	2000	Keski-Pohjanmaa	Ei	Perusterveydenhuollossa (esim. terveyskeskus tai - asema)			MS-tauti hoitotasapainossa, arjen toimintakyky alentunut			1	0	2	0	1	1	En ollenkaan	En ollenkaan	Kohtalainen	Kohtalainen	En osaa sanoa	En osaa sanoa	Ei	Ei	Ei	Ei	Ei	Kyllä	Kyllä	En osaa sanoa	Ei koskaan	En osaa sanoa	Joskus	Usein	En osaa sanoa	Joskus	Usein	Usein	En osaa sanoa	En osaa sanoa	En osaa sanoa	Joskus	Joskus	Usein
45-54	Nainen	Ylempi korkeakoulututkinto	4	2	Osa-aikainen	Suomi	2000	Etelä-Pohjanmaa	Ei	Erikoissairaanhoidossa (esim. sairaalan neurologian poliklinikka)			MS-tauti hoitotasapainossa, arjen toimintakyky alentunut			60	0	2	0	3	2	En ollenkaan	En ollenkaan	Hyvä	Erinomainen	Kyllä, varmasti	Kyllä, varmasti	Kyllä	Kyllä	Ei	Kyllä	Ei	Ei	Ei	Ei koskaan	Ei koskaan	En osaa sanoa	Joskus	Usein	Joskus	Aina	Aina	Aina	Aina	Joskus	Aina	Aina	Aina	Joskus
35-44	Nainen	Toinen aste (Lukio tai ammattikoulu)	3	1	Eläkkeellä (ml. työkyvyttömyyseläke)	Ruotsi	2022	Pohjanmaa	Ei	Erikoissairaanhoidossa (esim. sairaalan neurologian poliklinikka)	Uusi MS-tauti diagnoosi			MS-tauti ei hoitotasapainossa (esim. pahenemisvaihe)		2	0	1	0	3	1	En ollenkaan	En ollenkaan	Huono	Huono	Kyllä, suurinpiirtein	Kyllä, varmasti	Ei	Ei	Ei	Ei	Ei	Kyllä	Ei	Ei koskaan	Ei koskaan	Ei koskaan	Aina	Joskus	Harvoin	Joskus	Usein	Harvoin	Harvoin	Ei koskaan	Harvoin	Ei koskaan	Ei koskaan	Harvoin
18-24	Mies	Alempi korkeakoulututkinto	2	0	Opiskelija	Suomi	2018	Vantaa-Kerava (ja HUS)	Kyllä	Erikoissairaanhoidossa (esim. sairaalan neurologian poliklinikka)		MS-tauti hoitotasapainossa, ei juuri toimintakykyhaittaa	MS-tauti hoitotasapainossa, arjen toimintakyky alentunut			7	2	15	10	5	3	En ollenkaan	Yli 7 päivää	Kohtalainen	Tyydyttävä	Kyllä, suurinpiirtein	Kyllä, suurinpiirtein	Kyllä	Ei	Kyllä	Kyllä	Ei	Kyllä	Ei	Ei koskaan	Ei koskaan	En osaa sanoa	Joskus	Usein	Usein	Usein	Usein	Usein	Aina	Ei koskaan	Joskus	Joskus	Joskus	Harvoin
45-54	Nainen	Alempi korkeakoulututkinto	5 tai enemmän	2	Eläkkeellä (ml. työkyvyttömyyseläke)	Suomi	2015	Kanta-Häme	Kyllä	Perusterveydenhuollossa (esim. terveyskeskus tai - asema)			MS-tauti hoitotasapainossa, arjen toimintakyky alentunut			100	0	2	0	0	0	En ollenkaan	En ollenkaan	Kohtalainen	Erinomainen	Kyllä, varmasti	Kyllä, varmasti	Kyllä	Ei	Ei	Ei	En osaa sanoa	Kyllä	Ei	Ei koskaan	Ei koskaan	En osaa sanoa	Joskus	Ei koskaan	Ei koskaan	Ei koskaan	Harvoin	Joskus	Usein	Ei koskaan	Ei koskaan	Ei koskaan	Ei koskaan	Ei koskaan
45-54	Mies	Opistoasteen tutkinto	2	0	Eläkkeellä (ml. työkyvyttömyyseläke)	Suomi	2010	Keski-Suomi	Ei	Erikoissairaanhoidossa (esim. sairaalan neurologian poliklinikka)		MS-tauti hoitotasapainossa, ei juuri toimintakykyhaittaa	MS-tauti hoitotasapainossa, arjen toimintakyky alentunut			1	1	0	0	2	0	En ollenkaan	En ollenkaan	Tyydyttävä	Tyydyttävä	En osaa sanoa	En osaa sanoa	Kyllä	Kyllä	En osaa sanoa	Kyllä	Ei	Ei	Ei	Harvoin	Ei koskaan	En osaa sanoa	Usein	Joskus	Joskus	Usein	Joskus	Joskus	Joskus	Joskus	Joskus	Joskus	Joskus	Harvoin
25-34	Nainen	Alempi korkeakoulututkinto	1 (Asun yksin)	0	Täysipäiväinen	Suomi	2020	Helsinki (ja HUS)	Kyllä	Perusterveydenhuollossa (esim. terveyskeskus tai - asema)		MS-tauti hoitotasapainossa, ei juuri toimintakykyhaittaa	MS-tauti hoitotasapainossa, arjen toimintakyky alentunut			0	0	2	0	1	2	En ollenkaan	En ollenkaan	Hyvä	Hyvä	En osaa sanoa	En osaa sanoa	Kyllä	Kyllä	Ei	Ei	Ei	Ei	Ei	Ei koskaan	Ei koskaan	En osaa sanoa	Joskus	Aina	Ei koskaan	Aina	Aina	Aina	Aina	Ei koskaan	En osaa sanoa	Ei koskaan	Aina	En osaa sanoa
55-64	Nainen	Opistoasteen tutkinto	2	0	Täysipäiväinen	Suomi	2022	Länsi-Uusimaa (ja HUS)	Ei	Erikoissairaanhoidossa (esim. sairaalan neurologian poliklinikka)		MS-tauti hoitotasapainossa, ei juuri toimintakykyhaittaa				2	0	0	0	0	0	En ollenkaan	En ollenkaan	Hyvä	Hyvä	Ei	Ei	Kyllä	Kyllä	Kyllä	Kyllä	Ei	Ei	Ei	Ei koskaan	Ei koskaan	En osaa sanoa	Ei koskaan	En osaa sanoa	Joskus	Aina	Aina	Aina	Aina	En osaa sanoa	Aina	Ei koskaan	En osaa sanoa	Ei koskaan
45-54	Nainen	Toinen aste (Lukio tai ammattikoulu)	3	0	Työtön	Suomi	2000	Satakunta	Ei	Erikoissairaanhoidossa (esim. sairaalan neurologian poliklinikka)		MS-tauti hoitotasapainossa, ei juuri toimintakykyhaittaa				1	0	1	0	1	1	En ollenkaan	En ollenkaan	Hyvä	Hyvä	Kyllä, suurinpiirtein	Kyllä, suurinpiirtein	En osaa sanoa	Kyllä	Ei	En osaa sanoa	Ei	Ei	Ei	Ei koskaan	Ei koskaan	En osaa sanoa	Usein	Joskus	Usein	Usein	Joskus	Joskus	Harvoin	Harvoin	Joskus	Joskus	Usein	Harvoin
45-54	Mies	Ylempi korkeakoulututkinto	3	1	Täysipäiväinen	Suomi	1996	Länsi-Uusimaa (ja HUS)	Ei	Erikoissairaanhoidossa (esim. sairaalan neurologian poliklinikka)			MS-tauti hoitotasapainossa, arjen toimintakyky alentunut			1	0	0	2	1	2	En ollenkaan	En ollenkaan	Hyvä	Tyydyttävä	Ei	Ei	Kyllä	Kyllä	Kyllä	Kyllä	Ei	Ei	Ei	Joskus	Ei koskaan	Ei koskaan	Joskus	Joskus	Joskus	Usein	Usein	Usein	Harvoin	Harvoin	Joskus	Harvoin	Usein	Ei koskaan
55-64	Nainen	Tutkijakoulutus	1 (Asun yksin)	0	Täysipäiväinen	Suomi	1986	Helsinki (ja HUS)	Kyllä	Erikoissairaanhoidossa (esim. sairaalan neurologian poliklinikka)		MS-tauti hoitotasapainossa, ei juuri toimintakykyhaittaa				1	0	7	2	1	4	En ollenkaan	En ollenkaan	Hyvä	Hyvä	Ei	Ei	Kyllä	Kyllä	Kyllä	Kyllä	Ei	Ei	Ei	Joskus	Ei koskaan	En osaa sanoa	Joskus	Aina	Usein	Aina	Aina	Aina	Aina	Joskus	Usein	Usein	Aina	Aina
45-54	Nainen	Toinen aste (Lukio tai ammattikoulu)	3	0	Osa-aikainen	Suomi	1999	Kymenlaakso	Ei	Erikoissairaanhoidossa (esim. sairaalan neurologian poliklinikka)			MS-tauti hoitotasapainossa, arjen toimintakyky alentunut			1	0	1	0	1	1	En ollenkaan	En ollenkaan	Kohtalainen	Hyvä	Kyllä, suurinpiirtein	Kyllä, suurinpiirtein	Kyllä	Kyllä	Kyllä	Kyllä	Ei	Ei	En osaa sanoa	Harvoin	Ei koskaan	En osaa sanoa	Harvoin	Usein	Joskus	Usein	Usein	Usein	Usein	Joskus	Usein	Usein	Joskus	Joskus
35-44	Nainen	Opistoasteen tutkinto	3	1	Täysipäiväinen	Suomi	2018	Varsinais-Suomi	Ei	Erikoissairaanhoidossa (esim. sairaalan neurologian poliklinikka)		MS-tauti hoitotasapainossa, ei juuri toimintakykyhaittaa				1	0	4	0	1	2	Alle 7 päivää	En ollenkaan	Hyvä	Hyvä	Ei	Kyllä, suurinpiirtein	Kyllä	Kyllä	Kyllä	Ei	Kyllä	Ei	Ei	Ei koskaan	Ei koskaan	Ei koskaan	Harvoin	Aina	Aina	Aina	Aina	Aina	Aina	Joskus	Usein	Joskus	Aina	Joskus
35-44	Nainen	Toinen aste (Lukio tai ammattikoulu)	5 tai enemmän	4 tai enemmän	Täysipäiväinen	Suomi	2011	Pirkanmaa	Ei	Erikoissairaanhoidossa (esim. sairaalan neurologian poliklinikka)				MS-tauti ei hoitotasapainossa (esim. pahenemisvaihe)		4	4	20	4	2	2	En ollenkaan	En ollenkaan	Hyvä	Tyydyttävä	Ei	Ei	Kyllä	Ei	Kyllä	Kyllä	Ei	Ei	Ei	Ei koskaan	Ei koskaan	En osaa sanoa	Usein	Usein	Usein	Harvoin	Joskus	Usein	Usein	Ei koskaan	Harvoin	Ei koskaan	Usein	Ei koskaan
55-64	Nainen	Opistoasteen tutkinto	2	0	Osa-aikainen	Suomi	2001	Lappi	Ei	Erikoissairaanhoidossa (esim. sairaalan neurologian poliklinikka)		MS-tauti hoitotasapainossa, ei juuri toimintakykyhaittaa				1	0	2	0	1	1	En ollenkaan	Yli 7 päivää	Hyvä	Hyvä	Kyllä, suurinpiirtein	Kyllä, suurinpiirtein	Kyllä	Kyllä	Kyllä	Kyllä	Ei	Ei	Ei	Harvoin	Ei koskaan	En osaa sanoa	Harvoin	Aina	Aina	Aina	Aina	Aina	Aina	Usein	Usein	Usein	Aina	Joskus
55-64	Mies	Ylempi korkeakoulututkinto	2	0	Täysipäiväinen	Suomi	1994	Pirkanmaa	Ei	Erikoissairaanhoidossa (esim. sairaalan neurologian poliklinikka)				MS-tauti ei hoitotasapainossa (esim. pahenemisvaihe)		2	1	3	1	3	4	En ollenkaan	En ollenkaan	Hyvä	Hyvä	Ei	Ei	Kyllä	Ei	Kyllä	Kyllä	Ei	Ei	Ei	Ei koskaan	Ei koskaan	En osaa sanoa	Harvoin	Aina	Usein	Aina	Aina	Aina	Aina	Ei koskaan	Usein	Usein	Usein	Ei koskaan
55-64	Nainen	Toinen aste (Lukio tai ammattikoulu)	2	0	Osa-aikainen	Suomi	2003	Keski-Uusimaa (ja HUS)	Ei	Erikoissairaanhoidossa (esim. sairaalan neurologian poliklinikka)			MS-tauti hoitotasapainossa, arjen toimintakyky alentunut			1	2	2	1	1	2	En ollenkaan	En ollenkaan	Tyydyttävä	Tyydyttävä	Kyllä, suurinpiirtein	Kyllä, suurinpiirtein	Kyllä	Kyllä	Kyllä	Kyllä	Ei	Kyllä	Kyllä	Harvoin	Ei koskaan	En osaa sanoa	Usein	Usein	Joskus	Usein	Usein	Joskus	Usein	Harvoin	Joskus	Joskus	Joskus	Joskus
75 tai vanhempi	Mies	Peruskoulu	2	0	Eläkkeellä (ml. työkyvyttömyyseläke)	Suomi	1988	Keski-Suomi	Ei	Perusterveydenhuollossa (esim. terveyskeskus tai - asema)			MS-tauti hoitotasapainossa, arjen toimintakyky alentunut			0	0	2	0	0	2	En ollenkaan	En ollenkaan	Kohtalainen	Kohtalainen	Ei	Kyllä, suurinpiirtein	Ei	Ei	Ei	En osaa sanoa	Kyllä	Ei	Ei	En osaa sanoa	En osaa sanoa	Ei koskaan	Harvoin	Harvoin	Harvoin	Harvoin	Joskus	Joskus	Harvoin	Harvoin	Joskus	Joskus	Joskus	Ei koskaan
25-34	Nainen	Alempi korkeakoulututkinto	3	1	Täysipäiväinen	Suomi	2021	Kanta-Häme	Ei	Erikoissairaanhoidossa (esim. sairaalan neurologian poliklinikka)		MS-tauti hoitotasapainossa, ei juuri toimintakykyhaittaa				5	5	4	2	3	4	En ollenkaan	En ollenkaan	Hyvä	Hyvä	Kyllä, suurinpiirtein	Kyllä, varmasti	Kyllä	Kyllä	Kyllä	Kyllä	Ei	Ei	Ei	En osaa sanoa	Ei koskaan	En osaa sanoa	Harvoin	Usein	Joskus	Usein	Usein	Usein	Aina	Harvoin	Aina	Harvoin	Harvoin	Harvoin
55-64	Nainen	Ylempi korkeakoulututkinto	4	0	Eläkkeellä (ml. työkyvyttömyyseläke)	Suomi	2010	Pirkanmaa	Ei	Perusterveydenhuollossa (esim. terveyskeskus tai - asema)			MS-tauti hoitotasapainossa, arjen toimintakyky alentunut			50	2	3	2	5	4	En ollenkaan	Yli 7 päivää	Tyydyttävä	Hyvä	Kyllä, suurinpiirtein	Kyllä, suurinpiirtein	Kyllä	Kyllä	Kyllä	Kyllä	Kyllä	Kyllä	Kyllä	En osaa sanoa	En osaa sanoa	En osaa sanoa	Joskus	Joskus	Joskus	Usein	Usein	Usein	Usein	Harvoin	Usein	Aina	Usein	Joskus
45-54	Nainen	Toinen aste (Lukio tai ammattikoulu)	2	1	Eläkkeellä (ml. työkyvyttömyyseläke)	Suomi	2020	Länsi-Uusimaa (ja HUS)	Ei	Erikoissairaanhoidossa (esim. sairaalan neurologian poliklinikka)		MS-tauti hoitotasapainossa, ei juuri toimintakykyhaittaa				1	0	2	0	0	2	En ollenkaan	En ollenkaan	Hyvä	Erinomainen	Kyllä, varmasti	En osaa sanoa	Kyllä	Kyllä	Ei	Kyllä	Ei	Ei	Ei	Joskus	Harvoin	Aina	Harvoin	Usein	Harvoin	Aina	Aina	Aina	Aina	Ei koskaan	Joskus	Ei koskaan	Usein	Ei koskaan
35-44	Nainen	Ylempi korkeakoulututkinto	2	0	Täysipäiväinen	Ruotsi	2016	Länsi-Uusimaa (ja HUS)	Ei	Erikoissairaanhoidossa (esim. sairaalan neurologian poliklinikka)		MS-tauti hoitotasapainossa, ei juuri toimintakykyhaittaa				1	0	10	0	1	5	En ollenkaan	Alle 7 päivää	Hyvä	Tyydyttävä	Ei	Ei	Kyllä	En osaa sanoa	Kyllä	Kyllä	Kyllä	Ei	Ei	Ei koskaan	Ei koskaan	En osaa sanoa	Usein	Joskus	Harvoin	Usein	Joskus	Joskus	Usein	Harvoin	Joskus	Joskus	En osaa sanoa	En osaa sanoa
65-74	Mies	Opistoasteen tutkinto	2	0	Eläkkeellä (ml. työkyvyttömyyseläke)	Suomi	2000	Pohjois-Karjala	Ei	Perusterveydenhuollossa (esim. terveyskeskus tai - asema)			MS-tauti hoitotasapainossa, arjen toimintakyky alentunut			1	0	12	1	2	3	En ollenkaan	En ollenkaan	Tyydyttävä	Hyvä	En osaa sanoa	Kyllä, varmasti	En osaa sanoa	Kyllä	Ei	Ei	Ei	En osaa sanoa	Ei	Ei koskaan	Ei koskaan	En osaa sanoa	Usein	Harvoin	En osaa sanoa	Usein	Usein	Usein	Joskus	En osaa sanoa	Joskus	Joskus	Joskus	Ei koskaan
25-34	Nainen	Toinen aste (Lukio tai ammattikoulu)	4	2	Täysipäiväinen	Suomi	2020	Satakunta	Ei	Erikoissairaanhoidossa (esim. sairaalan neurologian poliklinikka)		MS-tauti hoitotasapainossa, ei juuri toimintakykyhaittaa				3	3	1	0	5	1	En ollenkaan	En ollenkaan	Hyvä	Tyydyttävä	Kyllä, suurinpiirtein	Ei	Kyllä	Ei	Kyllä	Kyllä	Ei	Kyllä	Kyllä	Ei koskaan	Ei koskaan	En osaa sanoa	Joskus	Harvoin	Ei koskaan	Joskus	Harvoin	Ei koskaan	En osaa sanoa	Harvoin	Harvoin	Harvoin	Usein	Ei koskaan
45-54	Mies	Toinen aste (Lukio tai ammattikoulu)	3	1	Eläkkeellä (ml. työkyvyttömyyseläke)	Suomi	1991	Pohjois-Savo	Ei	Erikoissairaanhoidossa (esim. sairaalan neurologian poliklinikka)			MS-tauti hoitotasapainossa, arjen toimintakyky alentunut			30	1	2	1	2	4	En ollenkaan	En ollenkaan	Huono	Hyvä	Kyllä, suurinpiirtein	Kyllä, varmasti	Ei	Ei	Ei	Kyllä	Ei	Ei	Kyllä	Ei koskaan	Ei koskaan	En osaa sanoa	Usein	Joskus	Joskus	Usein	Usein	Usein	En osaa sanoa	Ei koskaan	En osaa sanoa	Harvoin	Harvoin	Joskus
35-44	Mies	Tutkijakoulutus	1 (Asun yksin)	0	Täysipäiväinen	Suomi	2020	Pirkanmaa	Ei	Erikoissairaanhoidossa (esim. sairaalan neurologian poliklinikka)		MS-tauti hoitotasapainossa, ei juuri toimintakykyhaittaa				1	0	1	0	1	1	En ollenkaan	En ollenkaan	Tyydyttävä	Hyvä	Kyllä, suurinpiirtein	Kyllä, suurinpiirtein	Kyllä	Kyllä	Ei	Kyllä	Ei	Ei	Ei	Joskus	Ei koskaan	Ei koskaan	Harvoin	Usein	Usein	Usein	Usein	Usein	Joskus	Joskus	Usein	Usein	Aina	Joskus
65-74	Nainen	Ylempi korkeakoulututkinto	1 (Asun yksin)	0	Täysipäiväinen	Suomi	2002	Helsinki (ja HUS)	Kyllä	Yksityisellä poliklinikalla (esim. yksityinen neurologi)			MS-tauti hoitotasapainossa, arjen toimintakyky alentunut			1	0	1	0	1	1	En ollenkaan	En ollenkaan	Tyydyttävä	Erinomainen	En osaa sanoa	En osaa sanoa	Ei	Ei	Ei	Kyllä	Ei	Ei	Kyllä	Ei koskaan	Ei koskaan	Ei koskaan	Ei koskaan	Aina	Aina	Aina	Aina	Aina	Aina	Ei koskaan	Aina	Aina	Aina	Ei koskaan
65-74	Mies	Opistoasteen tutkinto	2	0	Eläkkeellä (ml. työkyvyttömyyseläke)	Suomi	2005	Länsi-Uusimaa (ja HUS)	Kyllä	Erikoissairaanhoidossa (esim. sairaalan neurologian poliklinikka)			MS-tauti hoitotasapainossa, arjen toimintakyky alentunut			1	0	5	4	1	4	En ollenkaan	Alle 7 päivää	Huono	Kohtalainen	Ei	Ei	Kyllä	Kyllä	Ei	Kyllä	Ei	Kyllä	Ei	Harvoin	Harvoin	Harvoin	Joskus	Joskus	Joskus	Usein	Joskus	Joskus	Joskus	Joskus	Joskus	Usein	Harvoin	Joskus
65-74	Nainen	Alempi korkeakoulututkinto	2	0	Eläkkeellä (ml. työkyvyttömyyseläke)	Suomi	1995	Pohjanmaa	Kyllä	Perusterveydenhuollossa (esim. terveyskeskus tai - asema)		MS-tauti hoitotasapainossa, ei juuri toimintakykyhaittaa				1	0	2	0	1	2	En ollenkaan	En ollenkaan	Kohtalainen	Tyydyttävä	En osaa sanoa	En osaa sanoa	En osaa sanoa	En osaa sanoa	Ei	Kyllä	Ei	Kyllä	Ei	En osaa sanoa	En osaa sanoa	En osaa sanoa	En osaa sanoa	En osaa sanoa	En osaa sanoa	En osaa sanoa	En osaa sanoa	En osaa sanoa	En osaa sanoa	En osaa sanoa	En osaa sanoa	En osaa sanoa	En osaa sanoa	En osaa sanoa
45-54	Nainen	Opistoasteen tutkinto	2	0	Eläkkeellä (ml. työkyvyttömyyseläke)	Suomi	1998	Pohjois-Pohjanmaa	Ei	Erikoissairaanhoidossa (esim. sairaalan neurologian poliklinikka)				MS-tauti ei hoitotasapainossa (esim. pahenemisvaihe)		4	5	3	1	4	2	En ollenkaan	Yli 7 päivää	Tyydyttävä	Huono	Ei	Kyllä, suurinpiirtein	Kyllä	Ei	Ei	Ei	Kyllä	Kyllä	Ei	En osaa sanoa	En osaa sanoa	En osaa sanoa	Usein	Harvoin	Ei koskaan	Harvoin	Joskus	Harvoin	Joskus	Ei koskaan	Harvoin	Ei koskaan	Harvoin	Ei koskaan
45-54	Mies	Tutkijakoulutus	1 (Asun yksin)	0	Eläkkeellä (ml. työkyvyttömyyseläke)	Suomi	2007	Helsinki (ja HUS)	Ei	Perusterveydenhuollossa (esim. terveyskeskus tai - asema)			MS-tauti hoitotasapainossa, arjen toimintakyky alentunut			81	0	1	0	2	1	En ollenkaan	En ollenkaan	Huono	Kohtalainen	Ei	Kyllä, suurinpiirtein	Kyllä	Ei	Ei	Ei	Ei	Kyllä	Kyllä	Joskus	Ei koskaan	En osaa sanoa	Aina	Joskus	Aina	Aina	Usein	Usein	Usein	Harvoin	Usein	Aina	Joskus	Usein
45-54	Nainen	Alempi korkeakoulututkinto	2	0	Täysipäiväinen	Suomi	2019	Pohjois-Savo	Ei	Erikoissairaanhoidossa (esim. sairaalan neurologian poliklinikka)		MS-tauti hoitotasapainossa, ei juuri toimintakykyhaittaa	MS-tauti hoitotasapainossa, arjen toimintakyky alentunut			2	0	0	0	2	0	En ollenkaan	En ollenkaan	Hyvä	Erinomainen	En osaa sanoa	Kyllä, varmasti	Ei	Kyllä	Ei	Kyllä	Ei	Kyllä	Ei	Ei koskaan	Ei koskaan	Ei koskaan	Aina	Usein	Joskus	Usein	Usein	Usein	Aina	Ei koskaan	Aina	Usein	Usein	Ei koskaan
45-54	Nainen	Toinen aste (Lukio tai ammattikoulu)	2	1	Osa-aikainen	Suomi	2014	Pohjanmaa	Ei	Erikoissairaanhoidossa (esim. sairaalan neurologian poliklinikka)			MS-tauti hoitotasapainossa, arjen toimintakyky alentunut			1	1	2	1	1	3	En ollenkaan	En ollenkaan	Tyydyttävä	Hyvä	Kyllä, suurinpiirtein	Kyllä, suurinpiirtein	Kyllä	Kyllä	Ei	Kyllä	Ei	Kyllä	Ei	Ei koskaan	Ei koskaan	En osaa sanoa	Harvoin	Aina	Aina	Usein	Aina	Aina	Aina	Joskus	Usein	Aina	Usein	Usein
55-64	Nainen	Opistoasteen tutkinto	2	0	Täysipäiväinen	Suomi	2014	Helsinki (ja HUS)	Ei	Yksityisellä poliklinikalla (esim. yksityinen neurologi)		MS-tauti hoitotasapainossa, ei juuri toimintakykyhaittaa				0	0	2	0	0	2	En ollenkaan	En ollenkaan	Hyvä	Hyvä	Kyllä, suurinpiirtein	Ei	Kyllä	Ei	Ei	Kyllä	Ei	Ei	Ei	En osaa sanoa	En osaa sanoa	En osaa sanoa	En osaa sanoa	En osaa sanoa	En osaa sanoa	En osaa sanoa	En osaa sanoa	En osaa sanoa	En osaa sanoa	En osaa sanoa	En osaa sanoa	En osaa sanoa	En osaa sanoa	En osaa sanoa
45-54	Nainen	Alempi korkeakoulututkinto	2	1	Eläkkeellä (ml. työkyvyttömyyseläke)	Suomi	2013	En osaa sanoa	Ei	Erikoissairaanhoidossa (esim. sairaalan neurologian poliklinikka)			MS-tauti hoitotasapainossa, arjen toimintakyky alentunut			45	0	2	0	0	0	En ollenkaan	En ollenkaan	Huono	Hyvä	En osaa sanoa	Kyllä, varmasti	Kyllä	Kyllä	Ei	Kyllä	Ei	Kyllä	En osaa sanoa	Ei koskaan	Ei koskaan	En osaa sanoa	Joskus	Usein	En osaa sanoa	Usein	Usein	Usein	Usein	En osaa sanoa	En osaa sanoa	En osaa sanoa	En osaa sanoa	En osaa sanoa
55-64	Nainen	Alempi korkeakoulututkinto	2	0	Osa-aikainen	Suomi	1997	Kanta-Häme	Kyllä	Erikoissairaanhoidossa (esim. sairaalan neurologian poliklinikka)			MS-tauti hoitotasapainossa, arjen toimintakyky alentunut			1	1	15	4	1	2	En ollenkaan	En ollenkaan	Tyydyttävä	Hyvä	Ei	Ei	Kyllä	Kyllä	Ei	Kyllä	Ei	Kyllä	Ei	Ei koskaan	Ei koskaan	En osaa sanoa	Harvoin	Usein	Harvoin	Usein	Usein	Usein	Aina	Usein	Usein	Harvoin	Usein	Harvoin
35-44	Nainen	Tutkijakoulutus	2	0	Osa-aikainen	Suomi	2018	Varsinais-Suomi	Ei	Erikoissairaanhoidossa (esim. sairaalan neurologian poliklinikka)			MS-tauti hoitotasapainossa, arjen toimintakyky alentunut			2	2	2	4	3	5	En ollenkaan	En ollenkaan	Tyydyttävä	Hyvä	Kyllä, suurinpiirtein	Kyllä, suurinpiirtein	Kyllä	Kyllä	Kyllä	Kyllä	Ei	Kyllä	Ei	Joskus	Ei koskaan	En osaa sanoa	Harvoin	Joskus	Usein	Usein	Joskus	Usein	Usein	Harvoin	Joskus	Joskus	Usein	Harvoin
55-64	Nainen	Opistoasteen tutkinto	2	0	Täysipäiväinen	Suomi	2002	Kanta-Häme	Kyllä	Erikoissairaanhoidossa (esim. sairaalan neurologian poliklinikka)		MS-tauti hoitotasapainossa, ei juuri toimintakykyhaittaa				0	1	2	0	1	2	En ollenkaan	En ollenkaan	Hyvä	Hyvä	Kyllä, suurinpiirtein	Kyllä, varmasti	Kyllä	Kyllä	Ei	Kyllä	Ei	Ei	Ei	Ei koskaan	Ei koskaan	En osaa sanoa	Ei koskaan	Aina	Aina	Aina	Aina	Aina	Aina	Joskus	Usein	Joskus	Aina	Usein
55-64	Nainen	Opistoasteen tutkinto	2	0	Eläkkeellä (ml. työkyvyttömyyseläke)	Suomi	2014	Helsinki (ja HUS)	Ei	Perusterveydenhuollossa (esim. terveyskeskus tai - asema)					En halua sanoa	0	0	1	0	0	1	En ollenkaan	En ollenkaan	Huono	En osaa sanoa	Ei	Ei	En osaa sanoa	En osaa sanoa	Ei	Ei	Kyllä	Kyllä	Ei	En osaa sanoa	En osaa sanoa	En osaa sanoa	Aina	En osaa sanoa	En osaa sanoa	En osaa sanoa	En osaa sanoa	En osaa sanoa	En osaa sanoa	En osaa sanoa	En osaa sanoa	En osaa sanoa	En osaa sanoa	En osaa sanoa
45-54	Nainen	Ylempi korkeakoulututkinto	4	2	Täysipäiväinen	Suomi	2007	Keski-Uusimaa (ja HUS)	Kyllä	Erikoissairaanhoidossa (esim. sairaalan neurologian poliklinikka)				MS-tauti ei hoitotasapainossa (esim. pahenemisvaihe)		6	4	2	2	10	5	Alle 7 päivää	En ollenkaan	Tyydyttävä	Hyvä	Kyllä, suurinpiirtein	Kyllä, suurinpiirtein	Kyllä	Kyllä	Kyllä	Kyllä	Ei	Kyllä	Kyllä	Ei koskaan	Ei koskaan	En osaa sanoa	Joskus	Joskus	Joskus	Aina	Usein	Usein	Joskus	Ei koskaan	En osaa sanoa	Ei koskaan	Joskus	Ei koskaan
25-34	Nainen	Toinen aste (Lukio tai ammattikoulu)	1 (Asun yksin)	0	Täysipäiväinen	Suomi	2014	Keski-Suomi	Kyllä	Erikoissairaanhoidossa (esim. sairaalan neurologian poliklinikka)		MS-tauti hoitotasapainossa, ei juuri toimintakykyhaittaa				2	0	2	0	2	2	En ollenkaan	En ollenkaan	Kohtalainen	Hyvä	Kyllä, suurinpiirtein	Kyllä, suurinpiirtein	Kyllä	Ei	Ei	Kyllä	Ei	Ei	Ei	Ei koskaan	Ei koskaan	En osaa sanoa	Joskus	Usein	Usein	Usein	Aina	Aina	Aina	Harvoin	Usein	Usein	Usein	Harvoin
55-64	Nainen	Toinen aste (Lukio tai ammattikoulu)	3	0	Muu	Suomi	2006	Pohjois-Pohjanmaa	Kyllä	Erikoissairaanhoidossa (esim. sairaalan neurologian poliklinikka)			MS-tauti hoitotasapainossa, arjen toimintakyky alentunut			1	0	4	0	1	4	En ollenkaan	Yli 7 päivää	Huono	Kohtalainen	Ei	Kyllä, suurinpiirtein	Ei	Ei	Ei	Kyllä	Kyllä	Kyllä	Ei	Harvoin	Ei koskaan	Aina	Usein	Usein	Usein	Joskus	Joskus	Joskus	Joskus	Joskus	Joskus	Joskus	Aina	Usein
35-44	Nainen	Alempi korkeakoulututkinto	1 (Asun yksin)	0	Täysipäiväinen	Suomi	2010	Helsinki (ja HUS)	En osaa sanoa	Erikoissairaanhoidossa (esim. sairaalan neurologian poliklinikka)		MS-tauti hoitotasapainossa, ei juuri toimintakykyhaittaa				3	1	4	0	4	3	En ollenkaan	En ollenkaan	Tyydyttävä	En osaa sanoa	En osaa sanoa	En osaa sanoa	Kyllä	Kyllä	En osaa sanoa	Kyllä	En osaa sanoa	En osaa sanoa	En osaa sanoa	Ei koskaan	Ei koskaan	En osaa sanoa	Joskus	Usein	Harvoin	Joskus	Usein	Usein	Usein	Ei koskaan	En osaa sanoa	En osaa sanoa	En osaa sanoa	Ei koskaan
55-64	Nainen	Alempi korkeakoulututkinto	2	0	Eläkkeellä (ml. työkyvyttömyyseläke)	Suomi	1999	Pohjois-Pohjanmaa	En osaa sanoa	Perusterveydenhuollossa (esim. terveyskeskus tai - asema)					En halua sanoa	1	0	0	0	1	0	En ollenkaan	En ollenkaan	Tyydyttävä	Hyvä	En osaa sanoa	Kyllä, suurinpiirtein	Kyllä	Kyllä	Ei	Ei	En osaa sanoa	En osaa sanoa	En osaa sanoa	En osaa sanoa	Ei koskaan	Ei koskaan	Usein	Usein	En osaa sanoa	Usein	Usein	En osaa sanoa	Usein	En osaa sanoa	En osaa sanoa	En osaa sanoa	Usein	En osaa sanoa
55-64	Nainen	Opistoasteen tutkinto	1 (Asun yksin)	0	Osa-aikainen	Suomi	2018	Lappi	Kyllä	Erikoissairaanhoidossa (esim. sairaalan neurologian poliklinikka)			MS-tauti hoitotasapainossa, arjen toimintakyky alentunut			0	0	3	1	0	2	En ollenkaan	En ollenkaan	Kohtalainen	Kohtalainen	Ei	Kyllä, suurinpiirtein	Kyllä	Ei	Ei	Kyllä	En osaa sanoa	Kyllä	Ei	En osaa sanoa	En osaa sanoa	En osaa sanoa	En osaa sanoa	En osaa sanoa	En osaa sanoa	En osaa sanoa	En osaa sanoa	En osaa sanoa	En osaa sanoa	En osaa sanoa	En osaa sanoa	En osaa sanoa	En osaa sanoa	En osaa sanoa
55-64	Mies	Toinen aste (Lukio tai ammattikoulu)	2	0	Eläkkeellä (ml. työkyvyttömyyseläke)	Suomi	2004	Etelä-Pohjanmaa	Ei	Erikoissairaanhoidossa (esim. sairaalan neurologian poliklinikka)			MS-tauti hoitotasapainossa, arjen toimintakyky alentunut			76	0	0	0	3	0	En ollenkaan	En ollenkaan	Tyydyttävä	Hyvä	Kyllä, varmasti	Kyllä, varmasti	Ei	Ei	Kyllä	Kyllä	Ei	Ei	Kyllä	Ei koskaan	Harvoin	Aina	Harvoin	Aina	Aina	Aina	Aina	Aina	Aina	Aina	Aina	Aina	Usein	Aina
45-54	Nainen	Ylempi korkeakoulututkinto	5 tai enemmän	3	Täysipäiväinen	Suomi	2022	Keski-Uusimaa (ja HUS)	Ei	Erikoissairaanhoidossa (esim. sairaalan neurologian poliklinikka)		MS-tauti hoitotasapainossa, ei juuri toimintakykyhaittaa				1	0	0	0	1	0	En ollenkaan	En ollenkaan	Hyvä	Erinomainen	En osaa sanoa	En osaa sanoa	Kyllä	Kyllä	Kyllä	Kyllä	Ei	Ei	Ei	Joskus	Ei koskaan	En osaa sanoa	Harvoin	Usein	En osaa sanoa	Aina	Aina	Aina	Aina	En osaa sanoa	En osaa sanoa	En osaa sanoa	Aina	En osaa sanoa
45-54	Nainen	Ylempi korkeakoulututkinto	2	0	Osa-aikainen	Suomi	2005	Keski-Uusimaa (ja HUS)	Ei	Erikoissairaanhoidossa (esim. sairaalan neurologian poliklinikka)			MS-tauti hoitotasapainossa, arjen toimintakyky alentunut			1	0	0	2	1	1	En ollenkaan	En ollenkaan	Kohtalainen	Kohtalainen	Ei	Ei	Ei	Ei	Ei	Ei	Kyllä	Kyllä	Ei	Ei koskaan	Ei koskaan	Ei koskaan	Aina	Joskus	Harvoin	Joskus	Harvoin	Harvoin	Harvoin	Ei koskaan	Harvoin	Ei koskaan	Harvoin	Ei koskaan
55-64	Mies	Opistoasteen tutkinto	2	0	Täysipäiväinen	Suomi	2005	Länsi-Uusimaa (ja HUS)	Kyllä	Erikoissairaanhoidossa (esim. sairaalan neurologian poliklinikka)		MS-tauti hoitotasapainossa, ei juuri toimintakykyhaittaa				0	0	2	4	0	2	En ollenkaan	En ollenkaan	Hyvä	Hyvä	Kyllä, varmasti	Kyllä, varmasti	Kyllä	Ei	Ei	En osaa sanoa	Ei	Ei	Ei	Harvoin	Ei koskaan	En osaa sanoa	Joskus	Aina	Joskus	Aina	Aina	Aina	Aina	Ei koskaan	Usein	Usein	Usein	En osaa sanoa
65-74	Nainen	Opistoasteen tutkinto	2	0	Eläkkeellä (ml. työkyvyttömyyseläke)	Suomi	1999	Itä-Uusimaa (ja HUS)	En osaa sanoa	En osaa sanoa				MS-tauti ei hoitotasapainossa (esim. pahenemisvaihe)		2	0	4	2	2	0	Alle 7 päivää	En ollenkaan	Huono	Tyydyttävä	Ei	Ei	En osaa sanoa	Ei	Ei	Ei	Kyllä	Kyllä	Ei	Harvoin	Ei koskaan	En osaa sanoa	Aina	Harvoin	Ei koskaan	Joskus	Joskus	Harvoin	Harvoin	Harvoin	Joskus	Joskus	Usein	Harvoin
35-44	Nainen	Ylempi korkeakoulututkinto	4	2	Osa-aikainen	Suomi	2015	Lappi	Ei	Erikoissairaanhoidossa (esim. sairaalan neurologian poliklinikka)			MS-tauti hoitotasapainossa, arjen toimintakyky alentunut			20	1	0	0	4	0	En ollenkaan	En ollenkaan	Tyydyttävä	Hyvä	Kyllä, suurinpiirtein	Kyllä, suurinpiirtein	Kyllä	Ei	Kyllä	Kyllä	Ei	Ei	Kyllä	Harvoin	Ei koskaan	En osaa sanoa	En osaa sanoa	Aina	Harvoin	Usein	Usein	Usein	Usein	Usein	Usein	Harvoin	Usein	Ei koskaan
65-74	Mies	Ylempi korkeakoulututkinto	2	0	Eläkkeellä (ml. työkyvyttömyyseläke)	Ruotsi	1985	Helsinki (ja HUS)	Ei	Perusterveydenhuollossa (esim. terveyskeskus tai - asema)			MS-tauti hoitotasapainossa, arjen toimintakyky alentunut			40	5	8	5	4	3	En ollenkaan	En ollenkaan	Tyydyttävä	Hyvä	Kyllä, suurinpiirtein	Kyllä, suurinpiirtein	Kyllä	Ei	Ei	Kyllä	Ei	Ei	Ei	Ei koskaan	Ei koskaan	En osaa sanoa	Joskus	Usein	Usein	Usein	Usein	Usein	Usein	Joskus	Usein	Usein	Usein	Joskus
55-64	Nainen	Alempi korkeakoulututkinto	2	0	Eläkkeellä (ml. työkyvyttömyyseläke)	Suomi	1990	Helsinki (ja HUS)	Ei	Perusterveydenhuollossa (esim. terveyskeskus tai - asema)			MS-tauti hoitotasapainossa, arjen toimintakyky alentunut			55	2	5	0	5	4	En ollenkaan	En ollenkaan	Hyvä	Hyvä	Kyllä, suurinpiirtein	Kyllä, suurinpiirtein	Kyllä	Kyllä	Kyllä	Kyllä	Ei	Ei	Kyllä	Harvoin	Ei koskaan	En osaa sanoa	Usein	Harvoin	Harvoin	Usein	Usein	Usein	Usein	Harvoin	En osaa sanoa	Usein	Usein	Ei koskaan
55-64	Nainen	Opistoasteen tutkinto	2	0	Eläkkeellä (ml. työkyvyttömyyseläke)	Suomi	1996	Etelä-Karjala	Ei	Erikoissairaanhoidossa (esim. sairaalan neurologian poliklinikka)			MS-tauti hoitotasapainossa, arjen toimintakyky alentunut			1	3	5	5	6	3	En ollenkaan	En ollenkaan	Kohtalainen	Hyvä	Kyllä, suurinpiirtein	Kyllä, suurinpiirtein	En osaa sanoa	Kyllä	Kyllä	Kyllä	Ei	Kyllä	En osaa sanoa	Harvoin	Ei koskaan	En osaa sanoa	Joskus	Usein	Usein	Usein	Usein	Usein	Usein	En osaa sanoa	Usein	Usein	Usein	En osaa sanoa
55-64	Mies	Toinen aste (Lukio tai ammattikoulu)	1 (Asun yksin)	0	Eläkkeellä (ml. työkyvyttömyyseläke)	Suomi	2015	Keski-Suomi	Kyllä	Perusterveydenhuollossa (esim. terveyskeskus tai - asema)			MS-tauti hoitotasapainossa, arjen toimintakyky alentunut			5	5	5	5	10	10	En ollenkaan	En ollenkaan	Kohtalainen	Tyydyttävä	Kyllä, suurinpiirtein	Kyllä, suurinpiirtein	Ei	Ei	Kyllä	En osaa sanoa	Kyllä	En osaa sanoa	Kyllä	Harvoin	Ei koskaan	Ei koskaan	Usein	Usein	Usein	Usein	Usein	Usein	Usein	Usein	Usein	Usein	Usein	Usein
45-54	Nainen	Ylempi korkeakoulututkinto	3	1	Täysipäiväinen	Suomi	2014	Vantaa-Kerava (ja HUS)	Ei	Erikoissairaanhoidossa (esim. sairaalan neurologian poliklinikka)		MS-tauti hoitotasapainossa, ei juuri toimintakykyhaittaa				1	0	1	0	1	1	En ollenkaan	En ollenkaan	Hyvä	Hyvä	Ei	Ei	Kyllä	Kyllä	Ei	Kyllä	Ei	Ei	Ei	Ei koskaan	Ei koskaan	En osaa sanoa	Joskus	Usein	Harvoin	Aina	Aina	Aina	Aina	Joskus	Usein	Aina	Aina	En osaa sanoa
55-64	Nainen	Ylempi korkeakoulututkinto	1 (Asun yksin)	0	Eläkkeellä (ml. työkyvyttömyyseläke)	Suomi	2002	Vantaa-Kerava (ja HUS)	Ei	Perusterveydenhuollossa (esim. terveyskeskus tai - asema)			MS-tauti hoitotasapainossa, arjen toimintakyky alentunut			91	0	4	0	6	5	En ollenkaan	En ollenkaan	Huono	Tyydyttävä	Ei	En osaa sanoa	Kyllä	Ei	Ei	Ei	Kyllä	Kyllä	Ei	En osaa sanoa	En osaa sanoa	En osaa sanoa	Aina	Harvoin	Ei koskaan	En osaa sanoa	Joskus	En osaa sanoa	Ei koskaan	Harvoin	Joskus	Joskus	En osaa sanoa	En osaa sanoa
45-54	Nainen	Alempi korkeakoulututkinto	2	0	Täysipäiväinen	Suomi	2011	Kanta-Häme	Ei	Erikoissairaanhoidossa (esim. sairaalan neurologian poliklinikka)		MS-tauti hoitotasapainossa, ei juuri toimintakykyhaittaa				1	0	2	0	5	5	En ollenkaan	En ollenkaan	Hyvä	Erinomainen	Kyllä, suurinpiirtein	Kyllä, varmasti	Kyllä	Ei	Kyllä	Kyllä	Ei	Ei	Ei	Ei koskaan	Ei koskaan	En osaa sanoa	Harvoin	Aina	Aina	Aina	Aina	Aina	Aina	Ei koskaan	Aina	Usein	Aina	Joskus
35-44	Nainen	Ylempi korkeakoulututkinto	2	0	Täysipäiväinen	Suomi	2022	Varsinais-Suomi	Ei	Erikoissairaanhoidossa (esim. sairaalan neurologian poliklinikka)		MS-tauti hoitotasapainossa, ei juuri toimintakykyhaittaa				1	0	0	0	3	0	Alle 7 päivää	Alle 7 päivää	Tyydyttävä	Hyvä	Kyllä, suurinpiirtein	En osaa sanoa	Kyllä	Kyllä	Kyllä	En osaa sanoa	Kyllä	Kyllä	Ei	Joskus	Ei koskaan	Ei koskaan	Usein	Joskus	Usein	Joskus	Joskus	Joskus	Usein	Harvoin	Joskus	Usein	Joskus	Ei koskaan
35-44	Nainen	Alempi korkeakoulututkinto	4	2	Täysipäiväinen	Suomi	2014	Varsinais-Suomi	Ei	Erikoissairaanhoidossa (esim. sairaalan neurologian poliklinikka)		MS-tauti hoitotasapainossa, ei juuri toimintakykyhaittaa				1	0	2	0	1	2	En ollenkaan	En ollenkaan	Hyvä	Tyydyttävä	En osaa sanoa	Kyllä, suurinpiirtein	Kyllä	Ei	Ei	Kyllä	Ei	Ei	Ei	Ei koskaan	Ei koskaan	Ei koskaan	Ei koskaan	Usein	Usein	Usein	Joskus	Usein	Aina	Joskus	Usein	Harvoin	Joskus	Ei koskaan
35-44	Nainen	Tutkijakoulutus	2	0	Täysipäiväinen	Suomi	2012	Helsinki (ja HUS)	Ei	Erikoissairaanhoidossa (esim. sairaalan neurologian poliklinikka)		MS-tauti hoitotasapainossa, ei juuri toimintakykyhaittaa				1	0	1	1	2	2	En ollenkaan	En ollenkaan	Hyvä	Erinomainen	Kyllä, suurinpiirtein	Ei	Kyllä	Kyllä	Kyllä	Kyllä	Ei	Ei	Ei	Ei koskaan	Ei koskaan	En osaa sanoa	Ei koskaan	Ei koskaan	Joskus	Aina	Aina	Aina	Aina	Ei koskaan	Aina	Aina	Aina	Ei koskaan
45-54	Nainen	Alempi korkeakoulututkinto	4	1	Täysipäiväinen	Suomi	2012	Pohjois-Savo	Kyllä	Erikoissairaanhoidossa (esim. sairaalan neurologian poliklinikka)			MS-tauti hoitotasapainossa, arjen toimintakyky alentunut			4	1	15	2	4	10	En ollenkaan	En ollenkaan	Tyydyttävä	Hyvä	Ei	Ei	En osaa sanoa	Ei	Kyllä	Kyllä	Ei	Kyllä	Ei	Joskus	En osaa sanoa	En osaa sanoa	Usein	Joskus	Joskus	Usein	Usein	Usein	Joskus	Harvoin	Joskus	Joskus	Joskus	Joskus
35-44	Nainen	Ylempi korkeakoulututkinto	2	0	Täysipäiväinen	Suomi	2022	Helsinki (ja HUS)	Ei	Erikoissairaanhoidossa (esim. sairaalan neurologian poliklinikka)		MS-tauti hoitotasapainossa, ei juuri toimintakykyhaittaa				1	1	4	1	1	4	En ollenkaan	En ollenkaan	Hyvä	Erinomainen	Kyllä, suurinpiirtein	Kyllä, varmasti	En osaa sanoa	Ei	Kyllä	Kyllä	Ei	En osaa sanoa	En osaa sanoa	Ei koskaan	Ei koskaan	En osaa sanoa	Harvoin	Aina	Aina	Usein	Aina	Aina	Usein	En osaa sanoa	Usein	Usein	Aina	En osaa sanoa
65-74	Nainen	Alempi korkeakoulututkinto	1 (Asun yksin)	0	Eläkkeellä (ml. työkyvyttömyyseläke)	Suomi	1992	Vantaa-Kerava (ja HUS)	Ei	Yksityisellä poliklinikalla (esim. yksityinen neurologi)			MS-tauti hoitotasapainossa, arjen toimintakyky alentunut			40	0	1	1	2	2	En ollenkaan	Yli 7 päivää	Kohtalainen	En osaa sanoa	En osaa sanoa	Kyllä, suurinpiirtein	Ei	Ei	Ei	Kyllä	Ei	En osaa sanoa	Ei	Ei koskaan	Ei koskaan	En osaa sanoa	Harvoin	Aina	En osaa sanoa	Aina	Aina	Aina	Aina	Usein	Usein	Usein	En osaa sanoa	Usein
45-54	Nainen	Opistoasteen tutkinto	3	1	Osa-aikainen	Suomi	2021	Pohjois-Pohjanmaa	Ei	Erikoissairaanhoidossa (esim. sairaalan neurologian poliklinikka)		MS-tauti hoitotasapainossa, ei juuri toimintakykyhaittaa				10	2	2	2	3	1	En ollenkaan	En ollenkaan	Hyvä	Erinomainen	Kyllä, varmasti	Kyllä, suurinpiirtein	Kyllä	Kyllä	Kyllä	En osaa sanoa	Kyllä	Ei	Kyllä	Ei koskaan	Ei koskaan	Ei koskaan	Ei koskaan	Aina	Ei koskaan	Usein	Aina	Aina	Usein	Ei koskaan	Usein	Usein	Aina	Ei koskaan
65-74	Nainen	Toinen aste (Lukio tai ammattikoulu)	2	0	Eläkkeellä (ml. työkyvyttömyyseläke)	Suomi	2000	Pohjois-Karjala	Ei	Erikoissairaanhoidossa (esim. sairaalan neurologian poliklinikka)			MS-tauti hoitotasapainossa, arjen toimintakyky alentunut			42	1	5	6	5	3	En ollenkaan	Yli 7 päivää	Tyydyttävä	Hyvä	Kyllä, suurinpiirtein	Kyllä, suurinpiirtein	Ei	Ei	Ei	Kyllä	Ei	Kyllä	Ei	Ei koskaan	Ei koskaan	En osaa sanoa	Usein	Usein	Ei koskaan	Usein	Joskus	Joskus	Usein	Harvoin	En osaa sanoa	En osaa sanoa	Joskus	Ei koskaan
45-54	Nainen	En halua sanoa	1 (Asun yksin)	0	Eläkkeellä (ml. työkyvyttömyyseläke)	Suomi	2012	Pohjanmaa	Ei	Erikoissairaanhoidossa (esim. sairaalan neurologian poliklinikka)				MS-tauti ei hoitotasapainossa (esim. pahenemisvaihe)		1	0	0	0	3	0	En ollenkaan	Yli 7 päivää	Huono	Kohtalainen	En osaa sanoa	Kyllä, suurinpiirtein	Kyllä	Ei	En osaa sanoa	En osaa sanoa	Kyllä	Kyllä	Ei	En osaa sanoa	En osaa sanoa	En osaa sanoa	En osaa sanoa	En osaa sanoa	En osaa sanoa	Aina	Aina	Aina	Aina	Ei koskaan	Aina	En osaa sanoa	En osaa sanoa	En osaa sanoa
55-64	Nainen	Ylempi korkeakoulututkinto	2	0	Täysipäiväinen	Suomi	2016	Länsi-Uusimaa (ja HUS)	Kyllä	Erikoissairaanhoidossa (esim. sairaalan neurologian poliklinikka)		MS-tauti hoitotasapainossa, ei juuri toimintakykyhaittaa				1	0	2	0	2	2	En ollenkaan	Alle 7 päivää	Hyvä	Hyvä	Kyllä, suurinpiirtein	Kyllä, varmasti	Kyllä	Kyllä	Ei	Kyllä	Ei	Ei	En osaa sanoa	Joskus	Ei koskaan	En osaa sanoa	Harvoin	Aina	Usein	Usein	Aina	Usein	Usein	Harvoin	Usein	Usein	Usein	Joskus
65-74	Mies	Opistoasteen tutkinto	2	0	Eläkkeellä (ml. työkyvyttömyyseläke)	Suomi	2022	Keski-Suomi	Kyllä	Erikoissairaanhoidossa (esim. sairaalan neurologian poliklinikka)			MS-tauti hoitotasapainossa, arjen toimintakyky alentunut			35	3	2	4	4	3	En ollenkaan	Yli 7 päivää	Kohtalainen	Tyydyttävä	Ei	Kyllä, varmasti	Kyllä	Ei	Kyllä	Kyllä	Kyllä	Kyllä	Kyllä	Ei koskaan	Ei koskaan	Aina	Harvoin	Aina	Usein	Aina	Aina	Aina	Aina	Usein	Usein	Aina	Harvoin	Usein
35-44	Nainen	Toinen aste (Lukio tai ammattikoulu)	5 tai enemmän	4 tai enemmän	Eläkkeellä (ml. työkyvyttömyyseläke)	Suomi	2010	Etelä-Pohjanmaa	Kyllä	Erikoissairaanhoidossa (esim. sairaalan neurologian poliklinikka)			MS-tauti hoitotasapainossa, arjen toimintakyky alentunut			1	0	35	0	2	1	En ollenkaan	En ollenkaan	Kohtalainen	Hyvä	En osaa sanoa	En osaa sanoa	Kyllä	En osaa sanoa	Kyllä	Kyllä	Ei	Ei	Ei	Ei koskaan	Ei koskaan	Ei koskaan	Harvoin	Usein	Aina	Aina	Aina	Usein	Aina	Joskus	Usein	Usein	Usein	Usein
65-74	Nainen	Ylempi korkeakoulututkinto	2	0	Eläkkeellä (ml. työkyvyttömyyseläke)	Suomi	1994	Länsi-Uusimaa (ja HUS)	Kyllä	Yksityisellä poliklinikalla (esim. yksityinen neurologi)		MS-tauti hoitotasapainossa, ei juuri toimintakykyhaittaa				0	1	0	1	2	0	En ollenkaan	En ollenkaan	Tyydyttävä	Hyvä	En osaa sanoa	Kyllä, varmasti	Kyllä	Ei	Ei	Kyllä	Ei	Ei	Ei	Ei koskaan	Ei koskaan	En osaa sanoa	En osaa sanoa	Aina	Ei koskaan	Usein	Aina	Aina	Aina	En osaa sanoa	En osaa sanoa	En osaa sanoa	Usein	Ei koskaan
45-54	Nainen	Opistoasteen tutkinto	2	0	Eläkkeellä (ml. työkyvyttömyyseläke)	Suomi	1998	Pohjois-Savo	Kyllä	Erikoissairaanhoidossa (esim. sairaalan neurologian poliklinikka)			MS-tauti hoitotasapainossa, arjen toimintakyky alentunut			3	2	4	2	4	3	En ollenkaan	Alle 7 päivää	Tyydyttävä	Hyvä	Ei	Ei	Kyllä	Kyllä	Kyllä	Kyllä	Kyllä	Kyllä	Ei	Ei koskaan	Ei koskaan	Ei koskaan	Usein	Usein	Joskus	Usein	Usein	Usein	Usein	Joskus	Joskus	Joskus	Joskus	Joskus
45-54	Nainen	Ylempi korkeakoulututkinto	2	0	Täysipäiväinen	Suomi	2017	Kainuu	Ei	Erikoissairaanhoidossa (esim. sairaalan neurologian poliklinikka)			MS-tauti hoitotasapainossa, arjen toimintakyky alentunut		En halua sanoa	2	2	2	1	2	5	En ollenkaan	Yli 7 päivää	Huono	Erinomainen	Kyllä, suurinpiirtein	Kyllä, varmasti	Kyllä	Kyllä	Kyllä	Kyllä	Ei	En osaa sanoa	Kyllä	Joskus	En osaa sanoa	En osaa sanoa	Usein	Usein	Aina	Aina	Aina	Aina	Aina	Aina	Aina	Usein	Usein	En osaa sanoa
55-64	Nainen	Opistoasteen tutkinto	2	0	Eläkkeellä (ml. työkyvyttömyyseläke)	Ruotsi	2012	Pohjanmaa	Kyllä	Erikoissairaanhoidossa (esim. sairaalan neurologian poliklinikka)			MS-tauti hoitotasapainossa, arjen toimintakyky alentunut			61	1	13	1	3	0	En ollenkaan	En ollenkaan	Huono	Tyydyttävä	En osaa sanoa	En osaa sanoa	Kyllä	En osaa sanoa	Kyllä	Kyllä	En osaa sanoa	Kyllä	En osaa sanoa	Ei koskaan	Ei koskaan	En osaa sanoa	Joskus	Usein	Aina	En osaa sanoa	Aina	Aina	Aina	Ei koskaan	Usein	Ei koskaan	En osaa sanoa	Joskus
45-54	Nainen	Toinen aste (Lukio tai ammattikoulu)	2	0	Täysipäiväinen	Suomi	2009	Pohjois-Pohjanmaa	Ei	Erikoissairaanhoidossa (esim. sairaalan neurologian poliklinikka)		MS-tauti hoitotasapainossa, ei juuri toimintakykyhaittaa				0	2	5	0	0	2	En ollenkaan	En ollenkaan	Hyvä	Hyvä	Kyllä, suurinpiirtein	Kyllä, varmasti	Kyllä	Kyllä	Ei	Kyllä	En osaa sanoa	Ei	Ei	En osaa sanoa	En osaa sanoa	En osaa sanoa	Joskus	Usein	Usein	Aina	Aina	Aina	Aina	Joskus	Aina	Aina	Usein	Usein
35-44	Nainen	Tutkijakoulutus	5 tai enemmän	4 tai enemmän	Eläkkeellä (ml. työkyvyttömyyseläke)	Suomi	2023	Etelä-Pohjanmaa	Kyllä	Erikoissairaanhoidossa (esim. sairaalan neurologian poliklinikka)	Uusi MS-tauti diagnoosi			MS-tauti ei hoitotasapainossa (esim. pahenemisvaihe)		10	3	50	2	2	4	Alle 7 päivää	En ollenkaan	Kohtalainen	Tyydyttävä	Ei	Kyllä, suurinpiirtein	Kyllä	Ei	Kyllä	En osaa sanoa	Kyllä	Kyllä	Ei	Joskus	Ei koskaan	Ei koskaan	Usein	Harvoin	Joskus	Usein	Joskus	Usein	Joskus	Harvoin	Joskus	Joskus	Joskus	Ei koskaan
45-54	Nainen	Ylempi korkeakoulututkinto	2	0	Eläkkeellä (ml. työkyvyttömyyseläke)	Suomi	2001	Pohjois-Pohjanmaa	Kyllä	Erikoissairaanhoidossa (esim. sairaalan neurologian poliklinikka)			MS-tauti hoitotasapainossa, arjen toimintakyky alentunut			107	2	4	1	4	2	En ollenkaan	En halua sanoa	Huono	Hyvä	En osaa sanoa	Kyllä, varmasti	Kyllä	Ei	Kyllä	Kyllä	Ei	Kyllä	En osaa sanoa	Ei koskaan	Ei koskaan	En osaa sanoa	Harvoin	Aina	Joskus	Usein	Usein	Aina	Usein	Joskus	Usein	Usein	Usein	Usein
45-54	Mies	Ylempi korkeakoulututkinto	4	1	Täysipäiväinen	Suomi	2015	Vantaa-Kerava (ja HUS)	Ei	En osaa sanoa			MS-tauti hoitotasapainossa, arjen toimintakyky alentunut			1	0	0	0	2	0	En ollenkaan	En ollenkaan	Huono	Huono	Ei	Ei	Ei	Ei	Ei	Ei	Ei	Kyllä	Ei	Ei koskaan	Ei koskaan	Ei koskaan	Ei koskaan	Ei koskaan	Ei koskaan	Ei koskaan	Ei koskaan	Ei koskaan	Ei koskaan	Ei koskaan	Ei koskaan	Ei koskaan	Ei koskaan	Ei koskaan
45-54	Nainen	Alempi korkeakoulututkinto	2	0	Työtön	Suomi	2007	Lappi	Ei	Erikoissairaanhoidossa (esim. sairaalan neurologian poliklinikka)		MS-tauti hoitotasapainossa, ei juuri toimintakykyhaittaa				2	3	3	0	2	3	En ollenkaan	En ollenkaan	Tyydyttävä	Erinomainen	Kyllä, varmasti	Kyllä, varmasti	Kyllä	Kyllä	Kyllä	Kyllä	Ei	Ei	Ei	Ei koskaan	Ei koskaan	Ei koskaan	Harvoin	Aina	Aina	Aina	Usein	Usein	Aina	Usein	Aina	Aina	Usein	Joskus
45-54	Mies	Alempi korkeakoulututkinto	5 tai enemmän	3	Täysipäiväinen	Suomi	2023	Pohjois-Savo	Kyllä	Erikoissairaanhoidossa (esim. sairaalan neurologian poliklinikka)	Uusi MS-tauti diagnoosi			MS-tauti ei hoitotasapainossa (esim. pahenemisvaihe)		7	1	2	0	4	2	Yli 7 päivää	En ollenkaan	Huono	Hyvä	Kyllä, varmasti	Kyllä, varmasti	Ei	Ei	Ei	Kyllä	Ei	Ei	Kyllä	Ei koskaan	Ei koskaan	En osaa sanoa	Harvoin	Usein	Usein	Usein	Aina	Aina	Usein	Usein	Usein	Aina	Joskus	Usein
45-54	Nainen	Ylempi korkeakoulututkinto	4	2	Työtön	Suomi	2001	Helsinki (ja HUS)	Ei	Erikoissairaanhoidossa (esim. sairaalan neurologian poliklinikka)				MS-tauti ei hoitotasapainossa (esim. pahenemisvaihe)		1	4	2	2	4	2	En ollenkaan	Yli 7 päivää	Tyydyttävä	Tyydyttävä	En osaa sanoa	En osaa sanoa	Kyllä	Ei	Ei	En osaa sanoa	Ei	Ei	Ei	En osaa sanoa	En osaa sanoa	En osaa sanoa	Joskus	Usein	Ei koskaan	Aina	Usein	Usein	Ei koskaan	Ei koskaan	Usein	Ei koskaan	Ei koskaan	Ei koskaan
45-54	Nainen	Opistoasteen tutkinto	2	0	Eläkkeellä (ml. työkyvyttömyyseläke)	Suomi	2016	Kanta-Häme	Ei	Erikoissairaanhoidossa (esim. sairaalan neurologian poliklinikka)			MS-tauti hoitotasapainossa, arjen toimintakyky alentunut			0	0	0	0	0	0	En ollenkaan	En ollenkaan	Kohtalainen	Erinomainen	En osaa sanoa	En osaa sanoa	Kyllä	Kyllä	Kyllä	Kyllä	Ei	Ei	En osaa sanoa	Ei koskaan	Ei koskaan	En osaa sanoa	Harvoin	Aina	Harvoin	Aina	Aina	Aina	Aina	En osaa sanoa	Aina	Aina	En osaa sanoa	En osaa sanoa
45-54	Nainen	Ylempi korkeakoulututkinto	3	1	Täysipäiväinen	Suomi	2014	Pohjois-Pohjanmaa	Ei	Erikoissairaanhoidossa (esim. sairaalan neurologian poliklinikka)		MS-tauti hoitotasapainossa, ei juuri toimintakykyhaittaa				1	2	1	1	2	1	En ollenkaan	En ollenkaan	Tyydyttävä	Hyvä	Kyllä, suurinpiirtein	Kyllä, varmasti	Ei	Ei	Ei	Ei	Ei	Ei	Ei	En osaa sanoa	Ei koskaan	Ei koskaan	Harvoin	Usein	Usein	Usein	Usein	Usein	Usein	Joskus	Joskus	Joskus	Usein	Joskus
25-34	Nainen	Toinen aste (Lukio tai ammattikoulu)	4	2	Täysipäiväinen	Suomi	2022	Länsi-Uusimaa (ja HUS)	Ei	Erikoissairaanhoidossa (esim. sairaalan neurologian poliklinikka)		MS-tauti hoitotasapainossa, ei juuri toimintakykyhaittaa				0	1	0	0	2	0	En ollenkaan	En ollenkaan	Hyvä	Hyvä	Kyllä, suurinpiirtein	Kyllä, suurinpiirtein	Ei	Ei	Ei	Kyllä	Ei	Ei	Ei	Ei koskaan	Ei koskaan	En osaa sanoa	Joskus	Joskus	Joskus	Usein	Usein	Usein	Usein	Ei koskaan	En osaa sanoa	Joskus	Joskus	Ei koskaan
55-64	Nainen	Toinen aste (Lukio tai ammattikoulu)	1 (Asun yksin)	0	Eläkkeellä (ml. työkyvyttömyyseläke)	Suomi	2019	Helsinki (ja HUS)	En osaa sanoa	Erikoissairaanhoidossa (esim. sairaalan neurologian poliklinikka)			MS-tauti hoitotasapainossa, arjen toimintakyky alentunut			42	10	2	2	3	2	En ollenkaan	Yli 7 päivää	Kohtalainen	Hyvä	Ei	Kyllä, suurinpiirtein	Kyllä	Kyllä	Kyllä	Kyllä	Ei	Kyllä	Kyllä	Usein	Ei koskaan	En osaa sanoa	Joskus	Aina	Joskus	Aina	Aina	Aina	Aina	Joskus	Aina	Usein	Joskus	Joskus
45-54	Nainen	Tutkijakoulutus	3	1	Täysipäiväinen	Suomi	2011	Pirkanmaa	Kyllä	Erikoissairaanhoidossa (esim. sairaalan neurologian poliklinikka)		MS-tauti hoitotasapainossa, ei juuri toimintakykyhaittaa				2	1	10	5	4	6	En ollenkaan	En ollenkaan	Hyvä	Hyvä	Kyllä, suurinpiirtein	Ei	Ei	Kyllä	Ei	Kyllä	Ei	Ei	Kyllä	En osaa sanoa	En osaa sanoa	En osaa sanoa	Joskus	Aina	Joskus	Aina	Usein	Aina	Aina	Joskus	Usein	Usein	Usein	Ei koskaan
45-54	Nainen	Opistoasteen tutkinto	2	0	Eläkkeellä (ml. työkyvyttömyyseläke)	Suomi	2001	Varsinais-Suomi	Ei	Erikoissairaanhoidossa (esim. sairaalan neurologian poliklinikka)			MS-tauti hoitotasapainossa, arjen toimintakyky alentunut			12	1	0	0	3	0	En ollenkaan	En ollenkaan	Hyvä	Hyvä	Kyllä, suurinpiirtein	Kyllä, suurinpiirtein	Kyllä	Kyllä	Kyllä	Kyllä	Ei	Ei	Ei	Joskus	Ei koskaan	Ei koskaan	Joskus	Usein	Usein	Usein	Aina	Aina	Usein	Joskus	Usein	Joskus	Aina	Usein
55-64	Nainen	Ylempi korkeakoulututkinto	1 (Asun yksin)	0	Eläkkeellä (ml. työkyvyttömyyseläke)	Suomi	2002	Keski-Uusimaa (ja HUS)	Ei	Erikoissairaanhoidossa (esim. sairaalan neurologian poliklinikka)		MS-tauti hoitotasapainossa, ei juuri toimintakykyhaittaa				65	8	3	0	3	2	En ollenkaan	En ollenkaan	Tyydyttävä	Tyydyttävä	Ei	Ei	Kyllä	Kyllä	Ei	Kyllä	Ei	Ei	Ei	Ei koskaan	Ei koskaan	En osaa sanoa	Joskus	Joskus	Ei koskaan	Usein	Usein	Joskus	Joskus	Ei koskaan	En osaa sanoa	Harvoin	Usein	Ei koskaan
45-54	Mies	Ylempi korkeakoulututkinto	1 (Asun yksin)	0	Täysipäiväinen	Suomi	2012	Helsinki (ja HUS)	Ei	Erikoissairaanhoidossa (esim. sairaalan neurologian poliklinikka)		MS-tauti hoitotasapainossa, ei juuri toimintakykyhaittaa				1	1	3	1	3	3	En ollenkaan	En ollenkaan	Hyvä	Erinomainen	Kyllä, suurinpiirtein	Kyllä, varmasti	Kyllä	Kyllä	Kyllä	Kyllä	Ei	Kyllä	Ei	Ei koskaan	Ei koskaan	En osaa sanoa	Ei koskaan	Aina	Usein	Aina	Aina	Aina	Aina	Joskus	Aina	Usein	Aina	Harvoin
45-54	Nainen	Ylempi korkeakoulututkinto	3	1	Osa-aikainen	Suomi	2010	Pirkanmaa	Kyllä	Erikoissairaanhoidossa (esim. sairaalan neurologian poliklinikka)		MS-tauti hoitotasapainossa, ei juuri toimintakykyhaittaa				1	2	4	4	1	4	En ollenkaan	En ollenkaan	Kohtalainen	Hyvä	Kyllä, suurinpiirtein	Kyllä, suurinpiirtein	Kyllä	Kyllä	Kyllä	Kyllä	Ei	Kyllä	Ei	Ei koskaan	Ei koskaan	En osaa sanoa	Harvoin	Aina	Joskus	Usein	Usein	Aina	Usein	Harvoin	Usein	Joskus	Aina	Ei koskaan
45-54	Nainen	Toinen aste (Lukio tai ammattikoulu)	3	1	Työtön	Suomi	2007	Kanta-Häme	Kyllä	Erikoissairaanhoidossa (esim. sairaalan neurologian poliklinikka)			MS-tauti hoitotasapainossa, arjen toimintakyky alentunut			1	0	5	0	1	5	En ollenkaan	En ollenkaan	Tyydyttävä	Hyvä	En osaa sanoa	En osaa sanoa	Ei	Kyllä	Ei	Kyllä	Ei	Kyllä	Kyllä	Ei koskaan	Ei koskaan	Ei koskaan	Joskus	Usein	Harvoin	Usein	Aina	Aina	Joskus	Ei koskaan	En osaa sanoa	Harvoin	Usein	Ei koskaan
25-34	Nainen	Alempi korkeakoulututkinto	2	0	Osa-aikainen	Suomi	2023	Pirkanmaa	Kyllä	Erikoissairaanhoidossa (esim. sairaalan neurologian poliklinikka)	Uusi MS-tauti diagnoosi	MS-tauti hoitotasapainossa, ei juuri toimintakykyhaittaa				18	3	5	0	10	5	En ollenkaan	En ollenkaan	Tyydyttävä	Hyvä	Kyllä, varmasti	Kyllä, varmasti	Kyllä	Kyllä	Kyllä	Kyllä	Ei	Kyllä	Kyllä	Ei koskaan	Ei koskaan	En osaa sanoa	Joskus	Usein	Aina	Aina	Aina	Aina	Aina	Aina	Aina	Aina	Usein	Joskus
25-34	Nainen	Toinen aste (Lukio tai ammattikoulu)	1 (Asun yksin)	0	Täysipäiväinen	Suomi	2022	Pirkanmaa	Ei	Erikoissairaanhoidossa (esim. sairaalan neurologian poliklinikka)		MS-tauti hoitotasapainossa, ei juuri toimintakykyhaittaa				0	0	1	1	2	1	En ollenkaan	En ollenkaan	Hyvä	Hyvä	Kyllä, suurinpiirtein	Kyllä, suurinpiirtein	Ei	Ei	Kyllä	Kyllä	Ei	Ei	Ei	Ei koskaan	Ei koskaan	En osaa sanoa	Harvoin	Aina	Joskus	Usein	Usein	Usein	Aina	Ei koskaan	En osaa sanoa	Joskus	En osaa sanoa	Ei koskaan
35-44	Nainen	Alempi korkeakoulututkinto	2	0	Eläkkeellä (ml. työkyvyttömyyseläke)	Suomi	2018	Pirkanmaa	En osaa sanoa	Erikoissairaanhoidossa (esim. sairaalan neurologian poliklinikka)			MS-tauti hoitotasapainossa, arjen toimintakyky alentunut			80	2	4	2	5	8	En ollenkaan	Yli 7 päivää	Hyvä	Hyvä	Kyllä, suurinpiirtein	Kyllä, varmasti	Kyllä	Kyllä	Kyllä	Kyllä	Ei	Ei	Kyllä	Harvoin	Ei koskaan	En osaa sanoa	Joskus	Usein	Usein	Usein	Usein	Usein	Aina	En osaa sanoa	Usein	Joskus	Usein	Harvoin
65-74	Nainen	Opistoasteen tutkinto	2	0	Eläkkeellä (ml. työkyvyttömyyseläke)	Suomi	2004	Länsi-Uusimaa (ja HUS)	Ei	Erikoissairaanhoidossa (esim. sairaalan neurologian poliklinikka)			MS-tauti hoitotasapainossa, arjen toimintakyky alentunut			1	1	1	0	1	1	En ollenkaan	En ollenkaan	Tyydyttävä	Tyydyttävä	Ei	Ei	Kyllä	Kyllä	Ei	Kyllä	Ei	Ei	Ei	Ei koskaan	Ei koskaan	En osaa sanoa	Usein	Joskus	Harvoin	Usein	Usein	Joskus	Joskus	Harvoin	Joskus	Joskus	Usein	Harvoin
45-54	Mies	Alempi korkeakoulututkinto	2	0	Työtön	Suomi	2023	Kymenlaakso	Ei	Erikoissairaanhoidossa (esim. sairaalan neurologian poliklinikka)	Uusi MS-tauti diagnoosi					13	1	4	2	7	3	En ollenkaan	Alle 7 päivää	Tyydyttävä	Erinomainen	Kyllä, suurinpiirtein	Kyllä, suurinpiirtein	Kyllä	Ei	Kyllä	Kyllä	Kyllä	Kyllä	Kyllä	Harvoin	Ei koskaan	En osaa sanoa	Harvoin	Usein	En osaa sanoa	Aina	Aina	Aina	Usein	Usein	Aina	Usein	Aina	Aina
45-54	Nainen	Opistoasteen tutkinto	1 (Asun yksin)	0	Eläkkeellä (ml. työkyvyttömyyseläke)	Suomi	2019	Pohjois-Karjala	Ei	Erikoissairaanhoidossa (esim. sairaalan neurologian poliklinikka)			MS-tauti hoitotasapainossa, arjen toimintakyky alentunut			1	1	1	0	2	1	En ollenkaan	En ollenkaan	Tyydyttävä	Hyvä	Kyllä, suurinpiirtein	Kyllä, varmasti	Kyllä	Kyllä	Kyllä	Kyllä	Ei	Kyllä	Kyllä	Harvoin	Ei koskaan	Ei koskaan	Ei koskaan	Aina	Aina	Aina	Aina	Aina	Aina	Joskus	Aina	Usein	Usein	Aina
45-54	Nainen	Alempi korkeakoulututkinto	3	1	Täysipäiväinen	Suomi	2011	Varsinais-Suomi	Kyllä	Erikoissairaanhoidossa (esim. sairaalan neurologian poliklinikka)			MS-tauti hoitotasapainossa, arjen toimintakyky alentunut			2	1	5	2	3	1	En ollenkaan	En ollenkaan	Tyydyttävä	Hyvä	Kyllä, suurinpiirtein	Kyllä, suurinpiirtein	Kyllä	Kyllä	Kyllä	Kyllä	Ei	Kyllä	Ei	Ei koskaan	Ei koskaan	En osaa sanoa	Harvoin	Usein	Joskus	Usein	Usein	Usein	Usein	Ei koskaan	Joskus	Joskus	Usein	Joskus
45-54	Nainen	Alempi korkeakoulututkinto	4	2	Täysipäiväinen	Suomi	2022	Lappi	Kyllä	Erikoissairaanhoidossa (esim. sairaalan neurologian poliklinikka)			MS-tauti hoitotasapainossa, arjen toimintakyky alentunut			10	0	4	0	3	3	En ollenkaan	En ollenkaan	Tyydyttävä	Hyvä	Kyllä, suurinpiirtein	Ei	Kyllä	Kyllä	Kyllä	Kyllä	Ei	Ei	Ei	Ei koskaan	Ei koskaan	En osaa sanoa	Joskus	Joskus	Joskus	Usein	Usein	Usein	Aina	En osaa sanoa	Usein	Usein	Usein	Ei koskaan
35-44	Mies	Alempi korkeakoulututkinto	2	0	Täysipäiväinen	Suomi	2018	Etelä-Savo	Ei	Erikoissairaanhoidossa (esim. sairaalan neurologian poliklinikka)		MS-tauti hoitotasapainossa, ei juuri toimintakykyhaittaa				1	2	2	2	1	3	En ollenkaan	En ollenkaan	Hyvä	Hyvä	Kyllä, suurinpiirtein	Kyllä, suurinpiirtein	Kyllä	Ei	Kyllä	Kyllä	Ei	Ei	Ei	Ei koskaan	Ei koskaan	En osaa sanoa	Ei koskaan	En osaa sanoa	Usein	Joskus	Usein	Usein	Usein	Ei koskaan	En osaa sanoa	Joskus	En osaa sanoa	Ei koskaan
35-44	Nainen	Ylempi korkeakoulututkinto	2	0	Täysipäiväinen	Suomi	2020	Pirkanmaa	Ei	Erikoissairaanhoidossa (esim. sairaalan neurologian poliklinikka)		MS-tauti hoitotasapainossa, ei juuri toimintakykyhaittaa				2	0	2	1	1	2	En ollenkaan	En ollenkaan	Erinomainen	Erinomainen	Kyllä, suurinpiirtein	Kyllä, suurinpiirtein	Kyllä	Kyllä	Ei	Kyllä	Ei	Ei	Kyllä	Ei koskaan	Ei koskaan	En osaa sanoa	Ei koskaan	Aina	Aina	Aina	Aina	Aina	Aina	Usein	Aina	Aina	Aina	En osaa sanoa
45-54	Nainen	Alempi korkeakoulututkinto	1 (Asun yksin)	0	Täysipäiväinen	Suomi	2023	Itä-Uusimaa (ja HUS)	Ei	Erikoissairaanhoidossa (esim. sairaalan neurologian poliklinikka)	Uusi MS-tauti diagnoosi					4	1	6	2	6	7	En ollenkaan	En ollenkaan	Hyvä	Tyydyttävä	En osaa sanoa	En osaa sanoa	Kyllä	Kyllä	Kyllä	Kyllä	Kyllä	Ei	Ei	Ei koskaan	Ei koskaan	En osaa sanoa	Joskus	Usein	Joskus	Usein	Joskus	Usein	Usein	En osaa sanoa	Joskus	En osaa sanoa	En osaa sanoa	En osaa sanoa
45-54	Nainen	Alempi korkeakoulututkinto	3	1	Osa-aikainen	Suomi	2011	Helsinki (ja HUS)	Ei	Erikoissairaanhoidossa (esim. sairaalan neurologian poliklinikka)			MS-tauti hoitotasapainossa, arjen toimintakyky alentunut			1	2	5	0	1	3	En ollenkaan	En ollenkaan	Tyydyttävä	Huono	En osaa sanoa	Kyllä, suurinpiirtein	Kyllä	Kyllä	Kyllä	En osaa sanoa	Ei	Kyllä	Ei	Usein	Ei koskaan	En osaa sanoa	Aina	Joskus	Aina	Aina	Joskus	Joskus	Ei koskaan	Ei koskaan	En osaa sanoa	Joskus	Ei koskaan	Ei koskaan
55-64	Mies	Opistoasteen tutkinto	1 (Asun yksin)	0	Osa-aikainen	Muu	2014	Helsinki (ja HUS)	Ei	Erikoissairaanhoidossa (esim. sairaalan neurologian poliklinikka)			MS-tauti hoitotasapainossa, arjen toimintakyky alentunut			2	0	2	1	2	3	Alle 7 päivää	En ollenkaan	Tyydyttävä	Hyvä	Kyllä, suurinpiirtein	Kyllä, suurinpiirtein	Kyllä	Kyllä	Ei	En osaa sanoa	En osaa sanoa	Kyllä	Ei	Harvoin	Ei koskaan	En osaa sanoa	Harvoin	Usein	Usein	Aina	Aina	Aina	Usein	Joskus	Aina	Joskus	Harvoin	Joskus
35-44	Nainen	Alempi korkeakoulututkinto	2	0	Täysipäiväinen	Suomi	2011	Vantaa-Kerava (ja HUS)	Ei	Erikoissairaanhoidossa (esim. sairaalan neurologian poliklinikka)		MS-tauti hoitotasapainossa, ei juuri toimintakykyhaittaa				1	0	1	0	2	1	En ollenkaan	En ollenkaan	Hyvä	Hyvä	Kyllä, suurinpiirtein	Kyllä, varmasti	Kyllä	Kyllä	Kyllä	Kyllä	Ei	Ei	Ei	Ei koskaan	Ei koskaan	En osaa sanoa	Harvoin	Usein	Usein	Usein	Aina	Aina	Aina	En osaa sanoa	Usein	Usein	Usein	En osaa sanoa
35-44	Nainen	Ylempi korkeakoulututkinto	1 (Asun yksin)	0	Työtön	Suomi	2022	Pirkanmaa	Kyllä	Erikoissairaanhoidossa (esim. sairaalan neurologian poliklinikka)			MS-tauti hoitotasapainossa, arjen toimintakyky alentunut			2	6	2	8	3	4	En ollenkaan	En ollenkaan	Tyydyttävä	Hyvä	Ei	Kyllä, varmasti	Kyllä	Kyllä	Kyllä	Kyllä	Kyllä	Kyllä	Ei	Ei koskaan	Ei koskaan	En osaa sanoa	Joskus	Aina	Joskus	Usein	Usein	Joskus	Aina	Ei koskaan	Usein	Joskus	Joskus	Ei koskaan
45-54	Nainen	Ylempi korkeakoulututkinto	5 tai enemmän	3	Täysipäiväinen	Suomi	2009	Etelä-Savo	Kyllä	Erikoissairaanhoidossa (esim. sairaalan neurologian poliklinikka)				MS-tauti ei hoitotasapainossa (esim. pahenemisvaihe)		2	2	5	1	2	9	En ollenkaan	En ollenkaan	Tyydyttävä	Hyvä	Ei	Ei	Kyllä	Ei	Ei	Kyllä	Ei	Kyllä	Kyllä	Ei koskaan	En osaa sanoa	En osaa sanoa	Harvoin	Usein	Usein	Aina	Usein	Usein	Harvoin	Harvoin	Usein	Harvoin	Usein	Ei koskaan
45-54	Mies	Ylempi korkeakoulututkinto	2	0	Eläkkeellä (ml. työkyvyttömyyseläke)	Suomi	2008	Pohjois-Pohjanmaa	En osaa sanoa	Erikoissairaanhoidossa (esim. sairaalan neurologian poliklinikka)		MS-tauti hoitotasapainossa, ei juuri toimintakykyhaittaa				5	0	2	0	1	1	En ollenkaan	Yli 7 päivää	Hyvä	Hyvä	Kyllä, suurinpiirtein	Kyllä, suurinpiirtein	Kyllä	Ei	Kyllä	Kyllä	Ei	Kyllä	Kyllä	Joskus	Ei koskaan	En osaa sanoa	Harvoin	Harvoin	Harvoin	Joskus	Usein	Usein	Aina	Harvoin	Aina	Aina	Usein	Harvoin
55-64	Nainen	Opistoasteen tutkinto	1 (Asun yksin)	0	Eläkkeellä (ml. työkyvyttömyyseläke)	Suomi	2005	Varsinais-Suomi	Ei	Perusterveydenhuollossa (esim. terveyskeskus tai - asema)					En halua sanoa	0	0	0	0	0	0	En ollenkaan	En ollenkaan	Kohtalainen	Tyydyttävä	Ei	Ei	Kyllä	Ei	Ei	En osaa sanoa	Kyllä	Ei	Ei	Ei koskaan	Ei koskaan	Ei koskaan	Ei koskaan	En osaa sanoa	Aina	Usein	Aina	Aina	Aina	Usein	Usein	Aina	Harvoin	Aina
25-34	Mies	Alempi korkeakoulututkinto	1 (Asun yksin)	0	Täysipäiväinen	Suomi	2016	Etelä-Savo	Ei	Erikoissairaanhoidossa (esim. sairaalan neurologian poliklinikka)		MS-tauti hoitotasapainossa, ei juuri toimintakykyhaittaa				1	0	1	1	1	2	En ollenkaan	En ollenkaan	Hyvä	Erinomainen	Kyllä, suurinpiirtein	Kyllä, suurinpiirtein	Kyllä	Ei	Kyllä	Kyllä	Ei	Ei	Ei	Ei koskaan	Ei koskaan	En osaa sanoa	Joskus	En osaa sanoa	En osaa sanoa	En osaa sanoa	En osaa sanoa	En osaa sanoa	Aina	En osaa sanoa	En osaa sanoa	En osaa sanoa	Usein	Usein
45-54	Nainen	Alempi korkeakoulututkinto	4	2	Täysipäiväinen	Suomi	2018	Vantaa-Kerava (ja HUS)	Ei	Erikoissairaanhoidossa (esim. sairaalan neurologian poliklinikka)			MS-tauti hoitotasapainossa, arjen toimintakyky alentunut			5	0	1	1	4	1	En ollenkaan	En ollenkaan	Hyvä	Tyydyttävä	Ei	En osaa sanoa	Kyllä	Ei	En osaa sanoa	Kyllä	Ei	Kyllä	Kyllä	Ei koskaan	Ei koskaan	En osaa sanoa	Usein	Usein	Joskus	Usein	Usein	Usein	Usein	Ei koskaan	Joskus	Joskus	Joskus	Usein
55-64	Nainen	Ylempi korkeakoulututkinto	3	0	Eläkkeellä (ml. työkyvyttömyyseläke)	Suomi	2001	Länsi-Uusimaa (ja HUS)	Kyllä	Erikoissairaanhoidossa (esim. sairaalan neurologian poliklinikka)			MS-tauti hoitotasapainossa, arjen toimintakyky alentunut			42	0	5	1	3	4	En ollenkaan	Yli 7 päivää	Tyydyttävä	Hyvä	Ei	Kyllä, varmasti	Kyllä	Kyllä	Ei	Kyllä	Ei	Ei	Kyllä	Ei koskaan	Ei koskaan	En osaa sanoa	Joskus	Usein	Harvoin	Usein	Usein	Usein	Usein	Harvoin	Usein	Harvoin	Usein	Usein
55-64	Nainen	Opistoasteen tutkinto	2	0	Eläkkeellä (ml. työkyvyttömyyseläke)	Suomi	2014	Itä-Uusimaa (ja HUS)	Kyllä	Erikoissairaanhoidossa (esim. sairaalan neurologian poliklinikka)		MS-tauti hoitotasapainossa, ei juuri toimintakykyhaittaa				1	0	3	0	1	2	En ollenkaan	En ollenkaan	Tyydyttävä	Hyvä	Kyllä, suurinpiirtein	Kyllä, suurinpiirtein	Kyllä	Ei	Ei	Kyllä	Ei	Ei	Kyllä	Ei koskaan	Ei koskaan	Ei koskaan	Aina	Usein	Aina	Aina	Aina	Aina	Aina	Aina	Aina	Aina	Aina	Joskus
35-44	Nainen	Alempi korkeakoulututkinto	1 (Asun yksin)	0	Täysipäiväinen	Suomi	2019	Pohjanmaa	Ei	Erikoissairaanhoidossa (esim. sairaalan neurologian poliklinikka)			MS-tauti hoitotasapainossa, arjen toimintakyky alentunut			3	0	2	0	3	2	En ollenkaan	En ollenkaan	Kohtalainen	Tyydyttävä	Ei	Kyllä, suurinpiirtein	Kyllä	Kyllä	Ei	Ei	Kyllä	Kyllä	Ei	Ei koskaan	Ei koskaan	En osaa sanoa	Aina	Joskus	Ei koskaan	Joskus	Harvoin	Joskus	Usein	Ei koskaan	Ei koskaan	Ei koskaan	Ei koskaan	Ei koskaan
35-44	Nainen	Toinen aste (Lukio tai ammattikoulu)	4	0	Osa-aikainen	Suomi	2000	Keski-Suomi	Kyllä	Erikoissairaanhoidossa (esim. sairaalan neurologian poliklinikka)			MS-tauti hoitotasapainossa, arjen toimintakyky alentunut			20	0	2	0	4	4	Alle 7 päivää	En ollenkaan	Tyydyttävä	Tyydyttävä	Ei	Kyllä, suurinpiirtein	Ei	Ei	Kyllä	En osaa sanoa	Kyllä	Kyllä	Ei	Ei koskaan	Ei koskaan	En osaa sanoa	Usein	Joskus	Joskus	Joskus	Joskus	Joskus	Joskus	Ei koskaan	Harvoin	Harvoin	Harvoin	Ei koskaan
45-54	Nainen	Ylempi korkeakoulututkinto	3	0	Osa-aikainen	Suomi	2022	Kanta-Häme	Ei	Erikoissairaanhoidossa (esim. sairaalan neurologian poliklinikka)			MS-tauti hoitotasapainossa, arjen toimintakyky alentunut			2	2	5	5	1	2	En ollenkaan	En ollenkaan	Hyvä	Erinomainen	Kyllä, varmasti	Kyllä, varmasti	Ei	Kyllä	Ei	Kyllä	Ei	Ei	Ei	Ei koskaan	Ei koskaan	Ei koskaan	Harvoin	Aina	Usein	Aina	Aina	Aina	Aina	Joskus	Aina	Aina	Usein	Joskus
25-34	Nainen	Alempi korkeakoulututkinto	2	0	Täysipäiväinen	Suomi	2014	Kymenlaakso	Ei	Erikoissairaanhoidossa (esim. sairaalan neurologian poliklinikka)		MS-tauti hoitotasapainossa, ei juuri toimintakykyhaittaa				1	0	3	0	1	1	En ollenkaan	En ollenkaan	Hyvä	Hyvä	En osaa sanoa	Kyllä, varmasti	Kyllä	Ei	Kyllä	Kyllä	Ei	Ei	Ei	Ei koskaan	Ei koskaan	En osaa sanoa	Joskus	Usein	Joskus	Usein	Joskus	Joskus	Aina	Ei koskaan	Harvoin	Joskus	Joskus	Ei koskaan
55-64	Nainen	Opistoasteen tutkinto	2	0	Osa-aikainen	Suomi	2012	Keski-Pohjanmaa	Kyllä	Erikoissairaanhoidossa (esim. sairaalan neurologian poliklinikka)			MS-tauti hoitotasapainossa, arjen toimintakyky alentunut			3	0	4	0	1	4	En ollenkaan	En ollenkaan	Tyydyttävä	Tyydyttävä	Ei	Ei	Kyllä	Ei	Ei	Ei	Kyllä	Kyllä	Ei	Joskus	Ei koskaan	Ei koskaan	Aina	Joskus	Harvoin	Joskus	Joskus	Joskus	En osaa sanoa	Ei koskaan	Harvoin	Harvoin	Joskus	Ei koskaan
65-74	Mies	Toinen aste (Lukio tai ammattikoulu)	2	0	Eläkkeellä (ml. työkyvyttömyyseläke)	Suomi	1995	Pohjois-Karjala	Ei	Perusterveydenhuollossa (esim. terveyskeskus tai - asema)			MS-tauti hoitotasapainossa, arjen toimintakyky alentunut			20	0	5	0	20	5	En ollenkaan	En ollenkaan	Kohtalainen	Kohtalainen	Ei	Kyllä, suurinpiirtein	En osaa sanoa	En osaa sanoa	Ei	Ei	Kyllä	Kyllä	Ei	Ei koskaan	Ei koskaan	En osaa sanoa	Usein	Harvoin	Ei koskaan	Joskus	Usein	Joskus	Joskus	Joskus	Harvoin	Usein	Joskus	Joskus
45-54	Nainen	Alempi korkeakoulututkinto	2	1	Eläkkeellä (ml. työkyvyttömyyseläke)	Suomi	2000	Pirkanmaa	Kyllä	En osaa sanoa				MS-tauti ei hoitotasapainossa (esim. pahenemisvaihe)		0	0	0	1	0	1	En ollenkaan	En ollenkaan	Kohtalainen	Huono	Ei	Ei	Ei	Ei	Ei	Kyllä	Kyllä	Kyllä	Ei	Usein	Ei koskaan	En osaa sanoa	Aina	Ei koskaan	Joskus	Joskus	Joskus	Joskus	Harvoin	Ei koskaan	Joskus	Harvoin	Harvoin	Harvoin
45-54	Nainen	Ylempi korkeakoulututkinto	2	0	Täysipäiväinen	Suomi	2016	Pohjois-Savo	Kyllä	Erikoissairaanhoidossa (esim. sairaalan neurologian poliklinikka)		MS-tauti hoitotasapainossa, ei juuri toimintakykyhaittaa				1	0	2	1	1	2	En ollenkaan	En ollenkaan	Hyvä	Hyvä	Kyllä, suurinpiirtein	Kyllä, suurinpiirtein	Ei	Ei	Kyllä	Kyllä	Ei	Kyllä	Kyllä	Ei koskaan	Ei koskaan	En osaa sanoa	Aina	Joskus	Aina	Usein	Usein	Usein	Aina	Joskus	Usein	Usein	Usein	Joskus
55-64	Nainen	Toinen aste (Lukio tai ammattikoulu)	1 (Asun yksin)	0	Eläkkeellä (ml. työkyvyttömyyseläke)	Suomi	2000	Pohjois-Savo	Kyllä	Erikoissairaanhoidossa (esim. sairaalan neurologian poliklinikka)			MS-tauti hoitotasapainossa, arjen toimintakyky alentunut			80	0	3	0	7	2	En ollenkaan	En ollenkaan	Kohtalainen	Erinomainen	Kyllä, suurinpiirtein	Kyllä, suurinpiirtein	Kyllä	Kyllä	Ei	Kyllä	Ei	Ei	Kyllä	Ei koskaan	Ei koskaan	Ei koskaan	Ei koskaan	Aina	Aina	Aina	Aina	Aina	Aina	En osaa sanoa	Usein	Aina	En osaa sanoa	Usein
55-64	Nainen	Toinen aste (Lukio tai ammattikoulu)	2	0	Täysipäiväinen	Suomi	2008	Varsinais-Suomi	Kyllä	Erikoissairaanhoidossa (esim. sairaalan neurologian poliklinikka)		MS-tauti hoitotasapainossa, ei juuri toimintakykyhaittaa				1	2	3	0	1	3	En ollenkaan	En ollenkaan	Tyydyttävä	Tyydyttävä	Ei	En osaa sanoa	Kyllä	Ei	Ei	Kyllä	Kyllä	Ei	Ei	Ei koskaan	Ei koskaan	Ei koskaan	Joskus	Joskus	Harvoin	Usein	Joskus	Joskus	Joskus	Ei koskaan	Joskus	Harvoin	Aina	Ei koskaan
35-44	Mies	Toinen aste (Lukio tai ammattikoulu)	3	2	Täysipäiväinen	Suomi	2013	Varsinais-Suomi	Ei	Erikoissairaanhoidossa (esim. sairaalan neurologian poliklinikka)		MS-tauti hoitotasapainossa, ei juuri toimintakykyhaittaa				3	3	2	0	4	2	En ollenkaan	En ollenkaan	Hyvä	Hyvä	Kyllä, suurinpiirtein	Kyllä, suurinpiirtein	Ei	Kyllä	Kyllä	Kyllä	Kyllä	Kyllä	Ei	Ei koskaan	Ei koskaan	En osaa sanoa	Joskus	Aina	Harvoin	Usein	Aina	Aina	Usein	Joskus	Aina	Aina	Aina	Joskus
55-64	Nainen	Toinen aste (Lukio tai ammattikoulu)	2	0	Eläkkeellä (ml. työkyvyttömyyseläke)	Suomi	2002	Kanta-Häme	Ei	Erikoissairaanhoidossa (esim. sairaalan neurologian poliklinikka)			MS-tauti hoitotasapainossa, arjen toimintakyky alentunut			1	1	1	0	2	0	En ollenkaan	En ollenkaan	Tyydyttävä	Erinomainen	Kyllä, varmasti	Kyllä, varmasti	Kyllä	Ei	Kyllä	Kyllä	Ei	Kyllä	Ei	Ei koskaan	Ei koskaan	Ei koskaan	Usein	Usein	Usein	Usein	Usein	Usein	Usein	Joskus	Aina	Usein	Usein	Joskus
35-44	Nainen	Toinen aste (Lukio tai ammattikoulu)	4	2	Täysipäiväinen	Suomi	2016	Länsi-Uusimaa (ja HUS)	Ei	Erikoissairaanhoidossa (esim. sairaalan neurologian poliklinikka)			MS-tauti hoitotasapainossa, arjen toimintakyky alentunut			1	0	5	0	2	5	En ollenkaan	En ollenkaan	Kohtalainen	Erinomainen	Kyllä, varmasti	Kyllä, varmasti	Kyllä	Kyllä	Kyllä	Kyllä	Ei	Ei	Kyllä	Ei koskaan	Ei koskaan	En osaa sanoa	Joskus	Aina	Joskus	Aina	En osaa sanoa	Aina	Aina	En osaa sanoa	En osaa sanoa	En osaa sanoa	Aina	Ei koskaan
55-64	Nainen	Ylempi korkeakoulututkinto	2	0	Eläkkeellä (ml. työkyvyttömyyseläke)	Suomi	2001	Kanta-Häme	Ei	Perusterveydenhuollossa (esim. terveyskeskus tai - asema)			MS-tauti hoitotasapainossa, arjen toimintakyky alentunut			3	0	1	2	2	2	En ollenkaan	En ollenkaan	Kohtalainen	Hyvä	Kyllä, suurinpiirtein	Kyllä, varmasti	Kyllä	Kyllä	Ei	Kyllä	Ei	Ei	Kyllä	Ei koskaan	Ei koskaan	En osaa sanoa	Joskus	Usein	Aina	Aina	Aina	Aina	Usein	Usein	Usein	Aina	Joskus	Aina
35-44	Mies	Alempi korkeakoulututkinto	5 tai enemmän	3	Täysipäiväinen	Suomi	2016	Helsinki (ja HUS)	Ei	Erikoissairaanhoidossa (esim. sairaalan neurologian poliklinikka)		MS-tauti hoitotasapainossa, ei juuri toimintakykyhaittaa				3	1	2	2	3	4	En ollenkaan	En ollenkaan	Hyvä	Hyvä	Kyllä, suurinpiirtein	Kyllä, suurinpiirtein	Kyllä	Kyllä	Kyllä	Kyllä	Ei	Kyllä	Kyllä	Ei koskaan	Ei koskaan	En osaa sanoa	Joskus	Joskus	Joskus	Usein	Usein	Usein	Aina	Joskus	Usein	Usein	Usein	Harvoin
35-44	Nainen	Ylempi korkeakoulututkinto	2	0	Täysipäiväinen	Suomi	1997	Satakunta	Kyllä	Erikoissairaanhoidossa (esim. sairaalan neurologian poliklinikka)		MS-tauti hoitotasapainossa, ei juuri toimintakykyhaittaa				2	3	32	5	4	30	En ollenkaan	En ollenkaan	Hyvä	Hyvä	Ei	Ei	Kyllä	Kyllä	Kyllä	Kyllä	Ei	Ei	Ei	Joskus	Ei koskaan	En osaa sanoa	Usein	Joskus	Usein	Usein	Aina	Aina	Usein	Joskus	Usein	Usein	Usein	Harvoin
55-64	Mies	Alempi korkeakoulututkinto	2	0	Täysipäiväinen	Suomi	2013	Varsinais-Suomi	Kyllä	Erikoissairaanhoidossa (esim. sairaalan neurologian poliklinikka)		MS-tauti hoitotasapainossa, ei juuri toimintakykyhaittaa				1	0	0	1	1	1	En ollenkaan	En ollenkaan	Tyydyttävä	Hyvä	Ei	Ei	Kyllä	Kyllä	Kyllä	Kyllä	Ei	Kyllä	Ei	Ei koskaan	Ei koskaan	En osaa sanoa	Joskus	Usein	Aina	Usein	Aina	Aina	Aina	Usein	Aina	Aina	Aina	Aina
45-54	Nainen	Ylempi korkeakoulututkinto	2	0	Osa-aikainen	Suomi	2019	Länsi-Uusimaa (ja HUS)	Kyllä	Erikoissairaanhoidossa (esim. sairaalan neurologian poliklinikka)			MS-tauti hoitotasapainossa, arjen toimintakyky alentunut			4	2	12	0	4	8	En ollenkaan	En ollenkaan	Huono	Erinomainen	Kyllä, suurinpiirtein	Kyllä, varmasti	Kyllä	Kyllä	Ei	Kyllä	Ei	Kyllä	Kyllä	Ei koskaan	En osaa sanoa	En osaa sanoa	Joskus	Usein	Joskus	Usein	Aina	Aina	Aina	Joskus	Usein	Usein	Usein	Usein
25-34	Nainen	Toinen aste (Lukio tai ammattikoulu)	2	1	Osa-aikainen	Suomi	2013	Varsinais-Suomi	Ei	Erikoissairaanhoidossa (esim. sairaalan neurologian poliklinikka)		MS-tauti hoitotasapainossa, ei juuri toimintakykyhaittaa				3	0	1	2	2	2	En ollenkaan	En ollenkaan	Hyvä	Erinomainen	Kyllä, suurinpiirtein	Kyllä, varmasti	Kyllä	Ei	Kyllä	Kyllä	Ei	Kyllä	Kyllä	Ei koskaan	Ei koskaan	En osaa sanoa	Harvoin	Usein	Aina	Aina	Aina	Aina	Aina	Joskus	Usein	Aina	Aina	Ei koskaan
55-64	Nainen	Toinen aste (Lukio tai ammattikoulu)	2	0	Eläkkeellä (ml. työkyvyttömyyseläke)	Suomi	2011	Varsinais-Suomi	Ei	Erikoissairaanhoidossa (esim. sairaalan neurologian poliklinikka)			MS-tauti hoitotasapainossa, arjen toimintakyky alentunut			3	2	3	1	4	6	En ollenkaan	En ollenkaan	Tyydyttävä	Hyvä	Ei	Ei	Kyllä	Kyllä	Kyllä	Kyllä	Ei	Kyllä	Kyllä	Ei koskaan	Ei koskaan	Ei koskaan	Aina	Joskus	Joskus	Usein	Usein	Usein	Harvoin	Joskus	Usein	Aina	Usein	Ei koskaan
45-54	Nainen	Toinen aste (Lukio tai ammattikoulu)	3	0	Eläkkeellä (ml. työkyvyttömyyseläke)	Suomi	1999	Itä-Uusimaa (ja HUS)	En osaa sanoa	Erikoissairaanhoidossa (esim. sairaalan neurologian poliklinikka)		MS-tauti hoitotasapainossa, ei juuri toimintakykyhaittaa	MS-tauti hoitotasapainossa, arjen toimintakyky alentunut			1	0	0	0	2	0	En ollenkaan	En ollenkaan	Hyvä	Hyvä	En osaa sanoa	Kyllä, varmasti	Kyllä	Kyllä	Kyllä	Kyllä	Ei	En osaa sanoa	Kyllä	Ei koskaan	Ei koskaan	Ei koskaan	En osaa sanoa	Usein	Joskus	Usein	Usein	En osaa sanoa	Aina	En osaa sanoa	En osaa sanoa	Usein	Aina	Harvoin
45-54	Mies	Alempi korkeakoulututkinto	3	1	Täysipäiväinen	Suomi	2011	Pohjanmaa	Ei	Erikoissairaanhoidossa (esim. sairaalan neurologian poliklinikka)			MS-tauti hoitotasapainossa, arjen toimintakyky alentunut			50	2	2	2	3	2	En ollenkaan	Yli 7 päivää	Tyydyttävä	Hyvä	Kyllä, suurinpiirtein	Kyllä, suurinpiirtein	Kyllä	Kyllä	Ei	Kyllä	Ei	Ei	Kyllä	Ei koskaan	Ei koskaan	En osaa sanoa	Joskus	Usein	Joskus	Usein	Usein	Usein	Usein	Joskus	Usein	Usein	Usein	Joskus
55-64	Mies	Opistoasteen tutkinto	1 (Asun yksin)	0	Eläkkeellä (ml. työkyvyttömyyseläke)	Suomi	1999	Satakunta	Kyllä	Erikoissairaanhoidossa (esim. sairaalan neurologian poliklinikka)		MS-tauti hoitotasapainossa, ei juuri toimintakykyhaittaa				1	0	5	10	1	5	En ollenkaan	En ollenkaan	Hyvä	Hyvä	Kyllä, suurinpiirtein	Kyllä, suurinpiirtein	Kyllä	Kyllä	Kyllä	Kyllä	Ei	Ei	Ei	Ei koskaan	Ei koskaan	En osaa sanoa	Ei koskaan	Usein	Ei koskaan	Usein	Aina	Aina	Aina	Aina	Aina	Aina	Aina	Joskus
45-54	Nainen	Opistoasteen tutkinto	1 (Asun yksin)	0	Täysipäiväinen	Suomi	2022	Päijät-Häme	Ei	Erikoissairaanhoidossa (esim. sairaalan neurologian poliklinikka)			MS-tauti hoitotasapainossa, arjen toimintakyky alentunut			1	1	2	3	1	2	En ollenkaan	En ollenkaan	Kohtalainen	Tyydyttävä	Ei	Ei	Kyllä	Kyllä	Kyllä	Kyllä	Ei	Kyllä	Ei	Usein	Ei koskaan	En osaa sanoa	Joskus	En osaa sanoa	Harvoin	Harvoin	Joskus	Usein	Aina	Ei koskaan	En osaa sanoa	Ei koskaan	Ei koskaan	Ei koskaan
45-54	Mies	Toinen aste (Lukio tai ammattikoulu)	2	0	Osa-aikainen	Suomi	2004	Keski-Suomi	Kyllä	Erikoissairaanhoidossa (esim. sairaalan neurologian poliklinikka)		MS-tauti hoitotasapainossa, ei juuri toimintakykyhaittaa				1	3	6	3	2	3	En ollenkaan	En ollenkaan	Tyydyttävä	Hyvä	Kyllä, suurinpiirtein	Kyllä, suurinpiirtein	Kyllä	Ei	Ei	Kyllä	Ei	Kyllä	Ei	Ei koskaan	Ei koskaan	En osaa sanoa	Harvoin	Aina	Harvoin	Aina	En osaa sanoa	Usein	Aina	Harvoin	En osaa sanoa	Harvoin	Ei koskaan	Ei koskaan
55-64	Nainen	Ylempi korkeakoulututkinto	2	0	Täysipäiväinen	Suomi	1998	Helsinki (ja HUS)	Kyllä	Yksityisellä poliklinikalla (esim. yksityinen neurologi)		MS-tauti hoitotasapainossa, ei juuri toimintakykyhaittaa				4	1	9	2	1	10	En ollenkaan	En ollenkaan	Hyvä	Erinomainen	En osaa sanoa	Kyllä, suurinpiirtein	Ei	Ei	Ei	Kyllä	Ei	Ei	Ei	Ei koskaan	Ei koskaan	En osaa sanoa	Harvoin	Aina	Usein	Aina	Aina	Aina	Aina	Usein	Aina	Aina	Aina	Ei koskaan
35-44	Nainen	Toinen aste (Lukio tai ammattikoulu)	3	0	Muu	Suomi	2007	Kainuu	Ei	Erikoissairaanhoidossa (esim. sairaalan neurologian poliklinikka)		MS-tauti hoitotasapainossa, ei juuri toimintakykyhaittaa				0	1	0	0	0	0	En ollenkaan	En ollenkaan	Hyvä	Hyvä	En osaa sanoa	En osaa sanoa	Kyllä	Kyllä	Kyllä	Kyllä	Ei	Ei	Ei	Ei koskaan	En osaa sanoa	En osaa sanoa	Ei koskaan	Aina	Joskus	Aina	Aina	Aina	Aina	En osaa sanoa	Aina	En osaa sanoa	Usein	En osaa sanoa
45-54	Nainen	Ylempi korkeakoulututkinto	4	1	Täysipäiväinen	Suomi	2000	Keski-Suomi	Kyllä	Erikoissairaanhoidossa (esim. sairaalan neurologian poliklinikka)		MS-tauti hoitotasapainossa, ei juuri toimintakykyhaittaa				0	1	2	2	1	1	En ollenkaan	En ollenkaan	Hyvä	Erinomainen	Kyllä, suurinpiirtein	Ei	Ei	Ei	Ei	Kyllä	Ei	Ei	Ei	Ei koskaan	Ei koskaan	Ei koskaan	Joskus	Aina	Joskus	Usein	Aina	Aina	Usein	Harvoin	Joskus	Joskus	Usein	Ei koskaan
35-44	Nainen	Toinen aste (Lukio tai ammattikoulu)	4	2	Osa-aikainen	Suomi	2013	Etelä-Karjala	Ei	Erikoissairaanhoidossa (esim. sairaalan neurologian poliklinikka)		MS-tauti hoitotasapainossa, ei juuri toimintakykyhaittaa				1	0	0	0	1	0	En ollenkaan	En ollenkaan	Hyvä	Erinomainen	Kyllä, suurinpiirtein	Kyllä, suurinpiirtein	Kyllä	Kyllä	Kyllä	Kyllä	Ei	Ei	Ei	Ei koskaan	Ei koskaan	En osaa sanoa	Harvoin	Usein	Aina	Aina	Aina	Usein	Aina	Harvoin	Aina	Joskus	Aina	Joskus
55-64	Nainen	Alempi korkeakoulututkinto	2	0	Eläkkeellä (ml. työkyvyttömyyseläke)	Suomi	2003	Pohjois-Pohjanmaa	Kyllä	Perusterveydenhuollossa (esim. terveyskeskus tai - asema)			MS-tauti hoitotasapainossa, arjen toimintakyky alentunut			20	2	5	2	4	4	En ollenkaan	Yli 7 päivää	Tyydyttävä	Hyvä	Kyllä, suurinpiirtein	Kyllä, suurinpiirtein	En osaa sanoa	Kyllä	Kyllä	En osaa sanoa	En osaa sanoa	Kyllä	Ei	Ei koskaan	Ei koskaan	En osaa sanoa	Usein	Joskus	Usein	Usein	Usein	Usein	Usein	Joskus	En osaa sanoa	En osaa sanoa	Harvoin	Joskus
55-64	Nainen	Alempi korkeakoulututkinto	2	0	Eläkkeellä (ml. työkyvyttömyyseläke)	Suomi	1995	Pohjois-Pohjanmaa	Ei	Erikoissairaanhoidossa (esim. sairaalan neurologian poliklinikka)			MS-tauti hoitotasapainossa, arjen toimintakyky alentunut			0	0	0	0	0	0	En ollenkaan	En ollenkaan	Kohtalainen	Huono	En osaa sanoa	En osaa sanoa	Ei	En osaa sanoa	Ei	En osaa sanoa	Ei	Kyllä	Ei	En osaa sanoa	En osaa sanoa	En osaa sanoa	Usein	Usein	Usein	Joskus	Usein	Joskus	Joskus	Joskus	Joskus	Usein	Joskus	Joskus
65-74	Nainen	Toinen aste (Lukio tai ammattikoulu)	1 (Asun yksin)	0	Eläkkeellä (ml. työkyvyttömyyseläke)	Suomi	1992	Satakunta	En osaa sanoa	En osaa sanoa			MS-tauti hoitotasapainossa, arjen toimintakyky alentunut			1	0	0	0	0	0	En ollenkaan	En ollenkaan	Kohtalainen	En osaa sanoa	En osaa sanoa	En osaa sanoa	En osaa sanoa	En osaa sanoa	Ei	En osaa sanoa	Kyllä	En osaa sanoa	Ei	Ei koskaan	Ei koskaan	En osaa sanoa	En osaa sanoa	Harvoin	Ei koskaan	En osaa sanoa	En osaa sanoa	En osaa sanoa	Usein	Ei koskaan	En osaa sanoa	Ei koskaan	En osaa sanoa	En osaa sanoa
35-44	Nainen	Toinen aste (Lukio tai ammattikoulu)	3	1	Täysipäiväinen	Suomi	2020	Päijät-Häme	Ei	Erikoissairaanhoidossa (esim. sairaalan neurologian poliklinikka)		MS-tauti hoitotasapainossa, ei juuri toimintakykyhaittaa				1	0	10	2	2	2	En ollenkaan	En ollenkaan	Erinomainen	Hyvä	Kyllä, suurinpiirtein	Kyllä, suurinpiirtein	Ei	Ei	Kyllä	Kyllä	Ei	Ei	Ei	Ei koskaan	Ei koskaan	En osaa sanoa	Harvoin	Aina	Joskus	Usein	Usein	Usein	Usein	En osaa sanoa	Usein	Usein	Usein	Joskus
25-34	Nainen	Toinen aste (Lukio tai ammattikoulu)	2	0	Täysipäiväinen	Suomi	2021	Satakunta	Ei	Erikoissairaanhoidossa (esim. sairaalan neurologian poliklinikka)		MS-tauti hoitotasapainossa, ei juuri toimintakykyhaittaa				2	1	15	0	3	3	En ollenkaan	En ollenkaan	Tyydyttävä	Tyydyttävä	Ei	Ei	Kyllä	Ei	Kyllä	Ei	Kyllä	Kyllä	Ei	Ei koskaan	Ei koskaan	En osaa sanoa	Aina	Harvoin	Joskus	Harvoin	Usein	Usein	Harvoin	Ei koskaan	Harvoin	Harvoin	En osaa sanoa	Ei koskaan
55-64	Nainen	Opistoasteen tutkinto	1 (Asun yksin)	0	Eläkkeellä (ml. työkyvyttömyyseläke)	Suomi	1993	Päijät-Häme	Ei	Perusterveydenhuollossa (esim. terveyskeskus tai - asema)		MS-tauti hoitotasapainossa, ei juuri toimintakykyhaittaa				1	0	1	0	1	1	En ollenkaan	En ollenkaan	Tyydyttävä	En osaa sanoa	En osaa sanoa	Kyllä, varmasti	En osaa sanoa	En osaa sanoa	Ei	Ei	Ei	Ei	Ei	En osaa sanoa	En osaa sanoa	En osaa sanoa	En osaa sanoa	En osaa sanoa	Ei koskaan	En osaa sanoa	En osaa sanoa	En osaa sanoa	En osaa sanoa	En osaa sanoa	En osaa sanoa	En osaa sanoa	En osaa sanoa	En osaa sanoa
35-44	Nainen	Ylempi korkeakoulututkinto	2	0	Täysipäiväinen	Suomi	2008	Pohjois-Savo	Ei	Erikoissairaanhoidossa (esim. sairaalan neurologian poliklinikka)		MS-tauti hoitotasapainossa, ei juuri toimintakykyhaittaa				1	0	2	1	2	0	En ollenkaan	En ollenkaan	Erinomainen	Hyvä	Kyllä, suurinpiirtein	En osaa sanoa	En osaa sanoa	Kyllä	Kyllä	Kyllä	Ei	Ei	En osaa sanoa	Ei koskaan	Ei koskaan	En osaa sanoa	Joskus	Aina	Usein	Aina	Aina	Aina	Aina	En osaa sanoa	Aina	Aina	Joskus	Usein
45-54	Nainen	Opistoasteen tutkinto	2	0	Täysipäiväinen	Suomi	2003	Lappi	Kyllä	Erikoissairaanhoidossa (esim. sairaalan neurologian poliklinikka)		MS-tauti hoitotasapainossa, ei juuri toimintakykyhaittaa				2	0	10	2	2	4	En ollenkaan	En ollenkaan	Hyvä	Erinomainen	Kyllä, suurinpiirtein	Kyllä, varmasti	Kyllä	Kyllä	Ei	Kyllä	Ei	Ei	Ei	Ei koskaan	Ei koskaan	En osaa sanoa	Harvoin	Aina	Usein	Usein	Aina	Aina	Aina	Usein	Aina	Aina	Aina	Joskus
45-54	Mies	Ylempi korkeakoulututkinto	3	1	Osa-aikainen	Suomi	2008	Helsinki (ja HUS)	Kyllä	Erikoissairaanhoidossa (esim. sairaalan neurologian poliklinikka)			MS-tauti hoitotasapainossa, arjen toimintakyky alentunut			2	4	1	1	2	1	En ollenkaan	En ollenkaan	Tyydyttävä	Hyvä	Kyllä, suurinpiirtein	Kyllä, varmasti	Kyllä	Kyllä	Kyllä	Kyllä	Ei	Kyllä	En osaa sanoa	Ei koskaan	Ei koskaan	En osaa sanoa	Harvoin	Aina	Usein	Aina	Usein	Usein	Usein	Usein	Aina	Aina	Aina	Joskus
45-54	Nainen	Toinen aste (Lukio tai ammattikoulu)	4	2	Täysipäiväinen	Suomi	2006	Varsinais-Suomi	Kyllä	Erikoissairaanhoidossa (esim. sairaalan neurologian poliklinikka)		MS-tauti hoitotasapainossa, ei juuri toimintakykyhaittaa				2	4	6	8	2	12	Alle 7 päivää	En ollenkaan	Hyvä	Erinomainen	Kyllä, suurinpiirtein	Kyllä, suurinpiirtein	Kyllä	Kyllä	Kyllä	Kyllä	Ei	Ei	Ei	Ei koskaan	Ei koskaan	En osaa sanoa	Aina	Aina	Usein	Aina	Aina	Aina	Aina	Joskus	Aina	Aina	Usein	Harvoin
55-64	Mies	Toinen aste (Lukio tai ammattikoulu)	2	0	Eläkkeellä (ml. työkyvyttömyyseläke)	Suomi	2014	Varsinais-Suomi	Ei	Erikoissairaanhoidossa (esim. sairaalan neurologian poliklinikka)			MS-tauti hoitotasapainossa, arjen toimintakyky alentunut			12	2	3	2	2	2	En ollenkaan	Yli 7 päivää	Tyydyttävä	Hyvä	Kyllä, suurinpiirtein	Kyllä, suurinpiirtein	Kyllä	Kyllä	Kyllä	Kyllä	Ei	Ei	Ei	Ei koskaan	Ei koskaan	Aina	Joskus	Aina	Aina	Aina	Aina	Aina	Aina	Aina	Aina	Aina	Aina	Harvoin
45-54	Nainen	Opistoasteen tutkinto	2	0	Täysipäiväinen	Suomi	2013	Etelä-Karjala	Ei	Erikoissairaanhoidossa (esim. sairaalan neurologian poliklinikka)		MS-tauti hoitotasapainossa, ei juuri toimintakykyhaittaa				1	0	3	0	1	3	En ollenkaan	En ollenkaan	Tyydyttävä	Hyvä	Ei	Kyllä, suurinpiirtein	Ei	Ei	Kyllä	Kyllä	Ei	Ei	Ei	Ei koskaan	Ei koskaan	En osaa sanoa	Harvoin	Usein	Usein	Aina	Usein	Usein	Aina	Harvoin	En osaa sanoa	Ei koskaan	Joskus	Ei koskaan
55-64	Nainen	Ylempi korkeakoulututkinto	3	0	Täysipäiväinen	Suomi	2018	Helsinki (ja HUS)	Ei	Erikoissairaanhoidossa (esim. sairaalan neurologian poliklinikka)		MS-tauti hoitotasapainossa, ei juuri toimintakykyhaittaa				1	0	2	0	1	4	En ollenkaan	En ollenkaan	Erinomainen	Erinomainen	Kyllä, suurinpiirtein	En osaa sanoa	Kyllä	Kyllä	Kyllä	Kyllä	Ei	Ei	Ei	Ei koskaan	Ei koskaan	En osaa sanoa	Ei koskaan	Aina	Aina	Aina	Aina	Aina	Aina	En osaa sanoa	Aina	Aina	Aina	En osaa sanoa
45-54	Mies	Toinen aste (Lukio tai ammattikoulu)	3	0	Eläkkeellä (ml. työkyvyttömyyseläke)	Suomi	2019	Pirkanmaa	En osaa sanoa	Erikoissairaanhoidossa (esim. sairaalan neurologian poliklinikka)			MS-tauti hoitotasapainossa, arjen toimintakyky alentunut			1	1	3	1	45	3	En ollenkaan	Yli 7 päivää	Tyydyttävä	Hyvä	En osaa sanoa	Kyllä, suurinpiirtein	Kyllä	Kyllä	Kyllä	Kyllä	Ei	Ei	Ei	Harvoin	Ei koskaan	Ei koskaan	Harvoin	Usein	Joskus	Usein	Usein	Usein	Aina	Joskus	Usein	Usein	Usein	Joskus
45-54	Mies	Alempi korkeakoulututkinto	3	2	Täysipäiväinen	Suomi	2002	Etelä-Pohjanmaa	Ei	Erikoissairaanhoidossa (esim. sairaalan neurologian poliklinikka)		MS-tauti hoitotasapainossa, ei juuri toimintakykyhaittaa				2	0	2	1	5	4	En ollenkaan	En ollenkaan	Erinomainen	Erinomainen	Kyllä, varmasti	Kyllä, varmasti	Kyllä	Ei	Ei	Kyllä	Ei	Kyllä	Ei	Ei koskaan	Ei koskaan	En osaa sanoa	Joskus	Aina	Usein	Usein	Usein	Usein	Usein	Harvoin	En osaa sanoa	Joskus	Usein	Harvoin
55-64	Mies	Opistoasteen tutkinto	5 tai enemmän	3	Osa-aikainen	Suomi	2023	Pohjois-Pohjanmaa	Kyllä	Erikoissairaanhoidossa (esim. sairaalan neurologian poliklinikka)	Uusi MS-tauti diagnoosi					20	3	8	1	8	5	Alle 7 päivää	En ollenkaan	Kohtalainen	En osaa sanoa	En osaa sanoa	Kyllä, suurinpiirtein	Kyllä	En osaa sanoa	Kyllä	En osaa sanoa	Kyllä	Kyllä	En osaa sanoa	Harvoin	Ei koskaan	En osaa sanoa	Joskus	Usein	Usein	Joskus	Usein	En osaa sanoa	Usein	Ei koskaan	En osaa sanoa	Joskus	En osaa sanoa	Joskus
45-54	Nainen	Toinen aste (Lukio tai ammattikoulu)	2	0	Eläkkeellä (ml. työkyvyttömyyseläke)	Suomi	2007	Pohjanmaa	Ei	Erikoissairaanhoidossa (esim. sairaalan neurologian poliklinikka)			MS-tauti hoitotasapainossa, arjen toimintakyky alentunut			50	0	0	0	2	0	En ollenkaan	En ollenkaan	Kohtalainen	Tyydyttävä	Kyllä, suurinpiirtein	Kyllä, varmasti	Kyllä	Ei	Ei	Kyllä	Ei	Kyllä	Ei	Harvoin	Ei koskaan	En osaa sanoa	Joskus	Usein	Joskus	Usein	Usein	Usein	Usein	Ei koskaan	Usein	Joskus	Usein	Joskus
55-64	Nainen	Opistoasteen tutkinto	2	0	Eläkkeellä (ml. työkyvyttömyyseläke)	Suomi	1097	Länsi-Uusimaa (ja HUS)	Ei	Erikoissairaanhoidossa (esim. sairaalan neurologian poliklinikka)		MS-tauti hoitotasapainossa, ei juuri toimintakykyhaittaa				0	1	1	1	1	2	En ollenkaan	En ollenkaan	Hyvä	Hyvä	Kyllä, suurinpiirtein	Kyllä, varmasti	Kyllä	Kyllä	Kyllä	Kyllä	Ei	Ei	Ei	Ei koskaan	Ei koskaan	En osaa sanoa	Harvoin	Usein	Harvoin	Usein	Usein	Joskus	Usein	Ei koskaan	Usein	Harvoin	Usein	Ei koskaan
55-64	Mies	Alempi korkeakoulututkinto	1 (Asun yksin)	0	Eläkkeellä (ml. työkyvyttömyyseläke)	Suomi	2000	Helsinki (ja HUS)	Ei	Erikoissairaanhoidossa (esim. sairaalan neurologian poliklinikka)		MS-tauti hoitotasapainossa, ei juuri toimintakykyhaittaa				1	0	2	0	2	2	En ollenkaan	En ollenkaan	Tyydyttävä	Tyydyttävä	Ei	Kyllä, suurinpiirtein	Kyllä	Kyllä	Ei	En osaa sanoa	Ei	Kyllä	Ei	Ei koskaan	Ei koskaan	En osaa sanoa	Joskus	Aina	Joskus	Usein	Joskus	Usein	Usein	Ei koskaan	Joskus	Joskus	Joskus	Ei koskaan
45-54	Nainen	Ylempi korkeakoulututkinto	1 (Asun yksin)	0	Täysipäiväinen	Suomi	2004	Helsinki (ja HUS)	Ei	Erikoissairaanhoidossa (esim. sairaalan neurologian poliklinikka)			MS-tauti hoitotasapainossa, arjen toimintakyky alentunut			25	3	5	3	4	5	En ollenkaan	En ollenkaan	Kohtalainen	Tyydyttävä	Kyllä, suurinpiirtein	En osaa sanoa	Kyllä	Kyllä	Kyllä	Kyllä	Ei	Ei	Kyllä	Joskus	Ei koskaan	En osaa sanoa	Joskus	Aina	Joskus	Aina	Aina	Aina	Aina	Joskus	Usein	Usein	Joskus	Joskus
45-54	Nainen	Alempi korkeakoulututkinto	2	0	Osa-aikainen	Suomi	2019	Pohjois-Pohjanmaa	Ei	En osaa sanoa		MS-tauti hoitotasapainossa, ei juuri toimintakykyhaittaa				2	2	6	0	1	6	En ollenkaan	En ollenkaan	Tyydyttävä	Tyydyttävä	En osaa sanoa	En osaa sanoa	En osaa sanoa	En osaa sanoa	Ei	Kyllä	Ei	Ei	Ei	Joskus	Ei koskaan	En osaa sanoa	Aina	Joskus	Joskus	Joskus	Joskus	Joskus	Harvoin	Ei koskaan	Ei koskaan	Ei koskaan	En osaa sanoa	Harvoin
25-34	Nainen	Toinen aste (Lukio tai ammattikoulu)	4	2	Opiskelija	Suomi	2023	Keski-Pohjanmaa	Ei	Erikoissairaanhoidossa (esim. sairaalan neurologian poliklinikka)	Uusi MS-tauti diagnoosi	MS-tauti hoitotasapainossa, ei juuri toimintakykyhaittaa				3	0	9	0	4	2	Alle 7 päivää	En ollenkaan	Hyvä	Hyvä	Kyllä, suurinpiirtein	Kyllä, varmasti	Kyllä	Kyllä	Kyllä	Kyllä	Kyllä	Kyllä	Kyllä	En osaa sanoa	En osaa sanoa	En osaa sanoa	Joskus	Joskus	Aina	Joskus	Joskus	Joskus	Aina	En osaa sanoa	En osaa sanoa	Usein	En osaa sanoa	Usein
45-54	Nainen	Toinen aste (Lukio tai ammattikoulu)	1 (Asun yksin)	0	Eläkkeellä (ml. työkyvyttömyyseläke)	Suomi	2008	Etelä-Savo	Kyllä	Erikoissairaanhoidossa (esim. sairaalan neurologian poliklinikka)		MS-tauti hoitotasapainossa, ei juuri toimintakykyhaittaa				1	0	4	2	2	4	En ollenkaan	En ollenkaan	Hyvä	Huono	Ei	Ei	Kyllä	Ei	Ei	Ei	Kyllä	Kyllä	Ei	Aina	Ei koskaan	En osaa sanoa	Aina	Harvoin	Harvoin	Harvoin	Harvoin	Joskus	Harvoin	Ei koskaan	Ei koskaan	Ei koskaan	Joskus	Ei koskaan
55-64	Nainen	Opistoasteen tutkinto	1 (Asun yksin)	0	Eläkkeellä (ml. työkyvyttömyyseläke)	Suomi	2008	Kanta-Häme	Kyllä	Erikoissairaanhoidossa (esim. sairaalan neurologian poliklinikka)			MS-tauti hoitotasapainossa, arjen toimintakyky alentunut			3	0	1	0	2	1	En ollenkaan	En ollenkaan	Hyvä	Hyvä	En osaa sanoa	En osaa sanoa	Kyllä	Kyllä	Kyllä	Kyllä	Ei	Kyllä	Ei	Ei koskaan	Ei koskaan	Ei koskaan	Ei koskaan	Usein	Harvoin	Aina	Usein	Aina	Usein	Harvoin	Aina	Aina	Usein	Joskus
75 tai vanhempi	Mies	Ylempi korkeakoulututkinto	2	0	Eläkkeellä (ml. työkyvyttömyyseläke)	Suomi	1985	Etelä-Karjala	Kyllä	En osaa sanoa				MS-tauti ei hoitotasapainossa (esim. pahenemisvaihe)		0	0	1	0	0	0	En ollenkaan	En ollenkaan	Huono	Huono	Kyllä, varmasti	Kyllä, suurinpiirtein	Ei	Ei	Ei	Ei	Ei	Kyllä	Ei	Aina	Ei koskaan	Ei koskaan	Ei koskaan	Ei koskaan	Ei koskaan	Usein	Usein	Ei koskaan	Ei koskaan	Ei koskaan	Joskus	Ei koskaan	Ei koskaan	Ei koskaan
35-44	Nainen	Toinen aste (Lukio tai ammattikoulu)	1 (Asun yksin)	0	Täysipäiväinen	Suomi	2019	Kanta-Häme	Ei	Erikoissairaanhoidossa (esim. sairaalan neurologian poliklinikka)		MS-tauti hoitotasapainossa, ei juuri toimintakykyhaittaa				4	3	0	2	4	0	En ollenkaan	En ollenkaan	Hyvä	Erinomainen	En osaa sanoa	Kyllä, varmasti	Kyllä	Kyllä	Kyllä	Kyllä	Ei	Kyllä	En osaa sanoa	Ei koskaan	Ei koskaan	En osaa sanoa	Joskus	Usein	Usein	Usein	Usein	Aina	Aina	Joskus	Aina	Aina	Aina	En osaa sanoa
65-74	Mies	Peruskoulu	2	0	Eläkkeellä (ml. työkyvyttömyyseläke)	Suomi	1987	Helsinki (ja HUS)	Kyllä	Yksityisellä poliklinikalla (esim. yksityinen neurologi)				MS-tauti ei hoitotasapainossa (esim. pahenemisvaihe)		3	0	4	0	2	4	En ollenkaan	En ollenkaan	Kohtalainen	Tyydyttävä	Kyllä, varmasti	Kyllä, varmasti	Kyllä	Kyllä	Ei	Ei	Kyllä	Ei	Ei	Ei koskaan	Ei koskaan	En osaa sanoa	Usein	Aina	Joskus	Usein	Usein	Joskus	Aina	Ei koskaan	Joskus	Aina	Aina	Harvoin
45-54	Nainen	Opistoasteen tutkinto	1 (Asun yksin)	0	Osa-aikainen	Suomi	2018	Pirkanmaa	Kyllä	Erikoissairaanhoidossa (esim. sairaalan neurologian poliklinikka)		MS-tauti hoitotasapainossa, ei juuri toimintakykyhaittaa		MS-tauti ei hoitotasapainossa (esim. pahenemisvaihe)		2	2	2	2	3	3	En ollenkaan	En ollenkaan	Tyydyttävä	Hyvä	Ei	Ei	Kyllä	Ei	Ei	Kyllä	En osaa sanoa	Kyllä	Ei	Ei koskaan	Ei koskaan	En osaa sanoa	Usein	Usein	Usein	Usein	Usein	Usein	Usein	Joskus	Usein	Usein	Usein	Harvoin
45-54	Nainen	Ylempi korkeakoulututkinto	4	2	Täysipäiväinen	Suomi	2014	Pohjois-Karjala	Ei	Erikoissairaanhoidossa (esim. sairaalan neurologian poliklinikka)				MS-tauti ei hoitotasapainossa (esim. pahenemisvaihe)		2	0	4	0	3	5	En ollenkaan	En ollenkaan	Hyvä	Hyvä	Ei	Kyllä, suurinpiirtein	Kyllä	Ei	Kyllä	Ei	Kyllä	Ei	Ei	Ei koskaan	Ei koskaan	En osaa sanoa	Joskus	Joskus	Joskus	Usein	Usein	Usein	Usein	Joskus	Joskus	Harvoin	Joskus	Harvoin
55-64	Nainen	Toinen aste (Lukio tai ammattikoulu)	1 (Asun yksin)	0	Eläkkeellä (ml. työkyvyttömyyseläke)	Suomi	2013	Satakunta	Ei	Erikoissairaanhoidossa (esim. sairaalan neurologian poliklinikka)				MS-tauti ei hoitotasapainossa (esim. pahenemisvaihe)		66	1	2	1	3	1	En ollenkaan	Yli 7 päivää	Huono	Hyvä	Kyllä, suurinpiirtein	Kyllä, suurinpiirtein	Kyllä	Kyllä	Ei	Kyllä	Ei	Kyllä	Kyllä	Ei koskaan	Ei koskaan	En osaa sanoa	Usein	Joskus	Joskus	Usein	Usein	Usein	Usein	Joskus	Usein	Usein	Usein	Joskus
45-54	Nainen	Toinen aste (Lukio tai ammattikoulu)	1 (Asun yksin)	0	Eläkkeellä (ml. työkyvyttömyyseläke)	Suomi	2019	Keski-Suomi	Ei	Erikoissairaanhoidossa (esim. sairaalan neurologian poliklinikka)			MS-tauti hoitotasapainossa, arjen toimintakyky alentunut			5	1	1	0	4	1	En ollenkaan	Yli 7 päivää	Huono	Kohtalainen	Ei	Kyllä, suurinpiirtein	Kyllä	Ei	Ei	Kyllä	Ei	Kyllä	Ei	Ei koskaan	Ei koskaan	En osaa sanoa	Joskus	Usein	Joskus	Aina	Aina	Aina	Ei koskaan	Joskus	Usein	Aina	Joskus	Ei koskaan
35-44	Nainen	Toinen aste (Lukio tai ammattikoulu)	2	0	Täysipäiväinen	Suomi	2019	Etelä-Pohjanmaa	Kyllä	Erikoissairaanhoidossa (esim. sairaalan neurologian poliklinikka)			MS-tauti hoitotasapainossa, arjen toimintakyky alentunut			3	2	2	0	4	1	En ollenkaan	En ollenkaan	Kohtalainen	Hyvä	Kyllä, varmasti	Kyllä, varmasti	Kyllä	Kyllä	Ei	Kyllä	Ei	Kyllä	Kyllä	Ei koskaan	Ei koskaan	En osaa sanoa	Joskus	Usein	Aina	Usein	Usein	Usein	Aina	Aina	Usein	Usein	Usein	Aina
45-54	Nainen	Alempi korkeakoulututkinto	2	0	Täysipäiväinen	Suomi	2021	Keski-Uusimaa (ja HUS)	Kyllä	Erikoissairaanhoidossa (esim. sairaalan neurologian poliklinikka)		MS-tauti hoitotasapainossa, ei juuri toimintakykyhaittaa				2	0	3	0	2	3	En ollenkaan	Alle 7 päivää	Erinomainen	Tyydyttävä	Ei	Kyllä, suurinpiirtein	Ei	Ei	Ei	Ei	Kyllä	Ei	Ei	Ei koskaan	Ei koskaan	En osaa sanoa	Usein	Harvoin	Harvoin	Joskus	Harvoin	Harvoin	Joskus	Ei koskaan	Ei koskaan	Ei koskaan	Usein	Ei koskaan
45-54	Mies	Ylempi korkeakoulututkinto	3	0	Osa-aikainen	Suomi	1992	Keski-Uusimaa (ja HUS)	Kyllä	Erikoissairaanhoidossa (esim. sairaalan neurologian poliklinikka)			MS-tauti hoitotasapainossa, arjen toimintakyky alentunut			50	4	18	3	3	12	En ollenkaan	En ollenkaan	Tyydyttävä	Hyvä	En osaa sanoa	Ei	Kyllä	Ei	Kyllä	Kyllä	Ei	Ei	Kyllä	Harvoin	Ei koskaan	En osaa sanoa	Joskus	Usein	Usein	Usein	Usein	Aina	Usein	Joskus	Joskus	Joskus	Usein	Harvoin
45-54	Nainen	Ylempi korkeakoulututkinto	3	0	Täysipäiväinen	Suomi	2007	Pirkanmaa	Kyllä	Erikoissairaanhoidossa (esim. sairaalan neurologian poliklinikka)			MS-tauti hoitotasapainossa, arjen toimintakyky alentunut			1	1	2	0	1	3	En ollenkaan	En ollenkaan	Hyvä	Erinomainen	Kyllä, suurinpiirtein	Kyllä, suurinpiirtein	Kyllä	Kyllä	Kyllä	Kyllä	Ei	Kyllä	Ei	Ei koskaan	Ei koskaan	En osaa sanoa	Ei koskaan	Usein	Joskus	Aina	Aina	Aina	Aina	Aina	Aina	Aina	Usein	Joskus
45-54	Nainen	Toinen aste (Lukio tai ammattikoulu)	4	2	Muu	Suomi	2008	Kainuu	Kyllä	Erikoissairaanhoidossa (esim. sairaalan neurologian poliklinikka)			MS-tauti hoitotasapainossa, arjen toimintakyky alentunut			70	4	3	2	7	4	Yli 7 päivää	Yli 7 päivää	Kohtalainen	Hyvä	Kyllä, suurinpiirtein	Kyllä, suurinpiirtein	Kyllä	Ei	Kyllä	Kyllä	Ei	Kyllä	Kyllä	Ei koskaan	Ei koskaan	En osaa sanoa	Usein	Joskus	Joskus	Usein	Usein	Usein	Joskus	Harvoin	Usein	Joskus	Usein	Joskus
45-54	Nainen	Toinen aste (Lukio tai ammattikoulu)	1 (Asun yksin)	0	Opiskelija	Suomi	2022	Pirkanmaa	Ei	Erikoissairaanhoidossa (esim. sairaalan neurologian poliklinikka)			MS-tauti hoitotasapainossa, arjen toimintakyky alentunut			3	5	0	0	2	1	En ollenkaan	En ollenkaan	Tyydyttävä	Erinomainen	Kyllä, suurinpiirtein	Kyllä, varmasti	Kyllä	Kyllä	Kyllä	Kyllä	Ei	Ei	Kyllä	Ei koskaan	Ei koskaan	Ei koskaan	Joskus	Usein	Joskus	Usein	Usein	Usein	Usein	Usein	Usein	Usein	Usein	Joskus
45-54	Nainen	Toinen aste (Lukio tai ammattikoulu)	2	1	Täysipäiväinen	Suomi	1914	Helsinki (ja HUS)	Kyllä	Erikoissairaanhoidossa (esim. sairaalan neurologian poliklinikka)		MS-tauti hoitotasapainossa, ei juuri toimintakykyhaittaa				0	0	10	3	1	1	En ollenkaan	En ollenkaan	Tyydyttävä	Hyvä	Ei	Kyllä, varmasti	Kyllä	Kyllä	Kyllä	Kyllä	Ei	Kyllä	Ei	Ei koskaan	En osaa sanoa	En osaa sanoa	Joskus	Aina	Aina	Aina	Aina	Aina	Aina	En osaa sanoa	En osaa sanoa	Harvoin	En osaa sanoa	Joskus
55-64	Mies	Alempi korkeakoulututkinto	2	0	Eläkkeellä (ml. työkyvyttömyyseläke)	Suomi	2016	Keski-Suomi	Kyllä	Erikoissairaanhoidossa (esim. sairaalan neurologian poliklinikka)			MS-tauti hoitotasapainossa, arjen toimintakyky alentunut			2	1	1	0	2	1	En ollenkaan	En ollenkaan	Kohtalainen	Huono	Ei	Ei	Ei	Ei	Ei	Ei	Kyllä	Kyllä	Ei	Joskus	Ei koskaan	En osaa sanoa	Usein	Joskus	Joskus	Joskus	Joskus	Joskus	Usein	Harvoin	Harvoin	Harvoin	Usein	Joskus
45-54	Nainen	Alempi korkeakoulututkinto	1 (Asun yksin)	0	Eläkkeellä (ml. työkyvyttömyyseläke)	Suomi	2016	Päijät-Häme	Ei	Erikoissairaanhoidossa (esim. sairaalan neurologian poliklinikka)			MS-tauti hoitotasapainossa, arjen toimintakyky alentunut			1	2	0	0	0	0	En ollenkaan	En ollenkaan	Tyydyttävä	Hyvä	Kyllä, suurinpiirtein	Kyllä, suurinpiirtein	Kyllä	Kyllä	Kyllä	Kyllä	Ei	Ei	Ei	Ei koskaan	En osaa sanoa	En osaa sanoa	En osaa sanoa	Aina	Ei koskaan	Aina	Aina	Aina	Usein	Joskus	Usein	Aina	Usein	Usein
35-44	Nainen	Ylempi korkeakoulututkinto	2	0	Täysipäiväinen	Suomi	2013	Helsinki (ja HUS)	Ei	Erikoissairaanhoidossa (esim. sairaalan neurologian poliklinikka)			MS-tauti hoitotasapainossa, arjen toimintakyky alentunut			1	0	2	0	3	3	En ollenkaan	En ollenkaan	Tyydyttävä	Hyvä	Ei	Kyllä, suurinpiirtein	Ei	Kyllä	Ei	Kyllä	Kyllä	Kyllä	Ei	Ei koskaan	Ei koskaan	En osaa sanoa	Aina	Usein	Joskus	Aina	Aina	Aina	Aina	Ei koskaan	Aina	Ei koskaan	Ei koskaan	Ei koskaan
35-44	Nainen	Toinen aste (Lukio tai ammattikoulu)	3	2	Eläkkeellä (ml. työkyvyttömyyseläke)	Suomi	2007	Pohjois-Pohjanmaa	Kyllä	Erikoissairaanhoidossa (esim. sairaalan neurologian poliklinikka)			MS-tauti hoitotasapainossa, arjen toimintakyky alentunut			4	1	4	0	3	2	En ollenkaan	Alle 7 päivää	Tyydyttävä	Kohtalainen	Kyllä, suurinpiirtein	Kyllä, varmasti	Kyllä	Ei	Ei	Kyllä	Kyllä	Kyllä	Ei	Ei koskaan	Ei koskaan	En osaa sanoa	Aina	Joskus	Joskus	Joskus	Harvoin	Harvoin	Joskus	Harvoin	Harvoin	Harvoin	Harvoin	Joskus
55-64	Nainen	Toinen aste (Lukio tai ammattikoulu)	1 (Asun yksin)	0	Eläkkeellä (ml. työkyvyttömyyseläke)	Suomi	2005	Kymenlaakso	Kyllä	Erikoissairaanhoidossa (esim. sairaalan neurologian poliklinikka)			MS-tauti hoitotasapainossa, arjen toimintakyky alentunut			75	0	2	0	4	4	En ollenkaan	Yli 7 päivää	Tyydyttävä	Hyvä	Kyllä, suurinpiirtein	Kyllä, suurinpiirtein	Ei	Ei	Ei	Kyllä	Kyllä	Kyllä	En osaa sanoa	Ei koskaan	Ei koskaan	En osaa sanoa	Usein	Joskus	Joskus	Usein	Joskus	Joskus	Usein	Ei koskaan	En osaa sanoa	Harvoin	Harvoin	Ei koskaan
55-64	Nainen	Alempi korkeakoulututkinto	2	0	Täysipäiväinen	Suomi	2001	Pohjois-Savo	Kyllä	Erikoissairaanhoidossa (esim. sairaalan neurologian poliklinikka)		MS-tauti hoitotasapainossa, ei juuri toimintakykyhaittaa				0	0	2	0	2	2	En ollenkaan	En ollenkaan	Tyydyttävä	Erinomainen	Kyllä, suurinpiirtein	Kyllä, suurinpiirtein	Kyllä	Kyllä	Kyllä	Kyllä	Ei	Ei	Ei	Ei koskaan	Ei koskaan	En osaa sanoa	Joskus	Usein	Joskus	Aina	Aina	Aina	Aina	Joskus	Aina	Joskus	Aina	Joskus
45-54	Nainen	Toinen aste (Lukio tai ammattikoulu)	1 (Asun yksin)	0	Täysipäiväinen	Suomi	2023	Keski-Uusimaa (ja HUS)	Kyllä	Erikoissairaanhoidossa (esim. sairaalan neurologian poliklinikka)	Uusi MS-tauti diagnoosi					9	3	4	5	5	6	Yli 7 päivää	Yli 7 päivää	Kohtalainen	Erinomainen	Kyllä, suurinpiirtein	Kyllä, suurinpiirtein	Kyllä	Kyllä	Kyllä	Kyllä	Ei	Kyllä	Kyllä	Ei koskaan	Ei koskaan	En osaa sanoa	Ei koskaan	Aina	Aina	Aina	Aina	Aina	Aina	Aina	Aina	Aina	Usein	Aina
45-54	Nainen	Ylempi korkeakoulututkinto	4	2	Täysipäiväinen	Suomi	2023	Varsinais-Suomi	Ei	Erikoissairaanhoidossa (esim. sairaalan neurologian poliklinikka)	Uusi MS-tauti diagnoosi					4	6	1	1	4	2	En ollenkaan	En ollenkaan	Hyvä	Erinomainen	En osaa sanoa	Kyllä, varmasti	Kyllä	Ei	Ei	Kyllä	Kyllä	Ei	En osaa sanoa	Joskus	Ei koskaan	En osaa sanoa	En osaa sanoa	En osaa sanoa	Joskus	Usein	Usein	Usein	Usein	Ei koskaan	En osaa sanoa	En osaa sanoa	Aina	Joskus
55-64	Mies	Opistoasteen tutkinto	2	0	Täysipäiväinen	Suomi	2023	Pohjanmaa	Ei	Erikoissairaanhoidossa (esim. sairaalan neurologian poliklinikka)	Uusi MS-tauti diagnoosi					5	2	3	0	3	3	En ollenkaan	En ollenkaan	Tyydyttävä	Tyydyttävä	En osaa sanoa	En osaa sanoa	Kyllä	Kyllä	Kyllä	Ei	Ei	En osaa sanoa	Ei	Ei koskaan	Ei koskaan	En osaa sanoa	Ei koskaan	Usein	Joskus	Usein	Usein	Aina	Usein	Aina	En osaa sanoa	Aina	Harvoin	Harvoin
25-34	Nainen	Alempi korkeakoulututkinto	2	0	Osa-aikainen	Suomi	2018	Pirkanmaa	Kyllä	Erikoissairaanhoidossa (esim. sairaalan neurologian poliklinikka)		MS-tauti hoitotasapainossa, ei juuri toimintakykyhaittaa				1	0	2	0	1	2	En ollenkaan	En ollenkaan	Tyydyttävä	Kohtalainen	Ei	Kyllä, suurinpiirtein	Kyllä	Ei	Ei	Kyllä	Kyllä	Kyllä	Ei	En osaa sanoa	Ei koskaan	En osaa sanoa	Aina	Usein	Joskus	Joskus	Joskus	Harvoin	Usein	Ei koskaan	Ei koskaan	Ei koskaan	Ei koskaan	Ei koskaan
55-64	Nainen	Opistoasteen tutkinto	1 (Asun yksin)	0	Eläkkeellä (ml. työkyvyttömyyseläke)	Suomi	1999	Vantaa-Kerava (ja HUS)	Ei	Yksityisellä poliklinikalla (esim. yksityinen neurologi)			MS-tauti hoitotasapainossa, arjen toimintakyky alentunut			51	0	2	0	3	1	En ollenkaan	En ollenkaan	Tyydyttävä	Hyvä	Ei	Kyllä, suurinpiirtein	Kyllä	Ei	Ei	Kyllä	Ei	Kyllä	Ei	Ei koskaan	En osaa sanoa	En osaa sanoa	Ei koskaan	Aina	Joskus	Usein	Aina	Aina	Aina	Joskus	Usein	Joskus	Usein	Harvoin
45-54	Nainen	Ylempi korkeakoulututkinto	3	1	Täysipäiväinen	Suomi	1995	Länsi-Uusimaa (ja HUS)	Ei	Erikoissairaanhoidossa (esim. sairaalan neurologian poliklinikka)			MS-tauti hoitotasapainossa, arjen toimintakyky alentunut			64	1	3	2	5	2	En ollenkaan	En ollenkaan	Hyvä	Erinomainen	Ei	Kyllä, suurinpiirtein	Kyllä	Kyllä	Kyllä	Kyllä	Ei	Ei	Kyllä	Harvoin	Ei koskaan	En osaa sanoa	Ei koskaan	Aina	Joskus	Aina	Aina	Aina	Aina	Harvoin	Aina	Aina	Aina	Ei koskaan
35-44	Nainen	Toinen aste (Lukio tai ammattikoulu)	5 tai enemmän	2	Eläkkeellä (ml. työkyvyttömyyseläke)	Suomi	2007	Pohjanmaa	Ei	Erikoissairaanhoidossa (esim. sairaalan neurologian poliklinikka)			MS-tauti hoitotasapainossa, arjen toimintakyky alentunut			45	0	2	0	3	3	En ollenkaan	En ollenkaan	Kohtalainen	Kohtalainen	Ei	Kyllä, varmasti	Kyllä	Ei	Ei	En osaa sanoa	Kyllä	Kyllä	Ei	Joskus	Ei koskaan	En osaa sanoa	Aina	Joskus	Harvoin	Harvoin	Joskus	Joskus	Ei koskaan	Ei koskaan	Harvoin	Harvoin	Joskus	Ei koskaan
35-44	Mies	Alempi korkeakoulututkinto	1 (Asun yksin)	0	Täysipäiväinen	Suomi	2016	Pohjois-Pohjanmaa	Ei	Erikoissairaanhoidossa (esim. sairaalan neurologian poliklinikka)		MS-tauti hoitotasapainossa, ei juuri toimintakykyhaittaa				0	2	5	0	0	3	En ollenkaan	En ollenkaan	Hyvä	Kohtalainen	Kyllä, varmasti	Kyllä, suurinpiirtein	Ei	Ei	Ei	En osaa sanoa	Ei	Ei	Ei	Ei koskaan	Ei koskaan	En osaa sanoa	Aina	Aina	Usein	Harvoin	Harvoin	Harvoin	Joskus	Ei koskaan	Harvoin	Harvoin	Ei koskaan	Ei koskaan
35-44	Nainen	Alempi korkeakoulututkinto	2	0	Täysipäiväinen	Suomi	2013	Kainuu	Ei	Erikoissairaanhoidossa (esim. sairaalan neurologian poliklinikka)		MS-tauti hoitotasapainossa, ei juuri toimintakykyhaittaa				2	1	2	2	2	4	En ollenkaan	En ollenkaan	Hyvä	Erinomainen	En osaa sanoa	En osaa sanoa	Kyllä	Kyllä	Kyllä	Kyllä	Ei	Ei	En osaa sanoa	Harvoin	Ei koskaan	En osaa sanoa	Joskus	Usein	Usein	Aina	Aina	Aina	Aina	Usein	Usein	Usein	Aina	Ei koskaan
65-74	Mies	Ylempi korkeakoulututkinto	2	0	Eläkkeellä (ml. työkyvyttömyyseläke)	Suomi	2009	Satakunta	Kyllä	Erikoissairaanhoidossa (esim. sairaalan neurologian poliklinikka)			MS-tauti hoitotasapainossa, arjen toimintakyky alentunut			1	0	30	3	22	8	En ollenkaan	En ollenkaan	Kohtalainen	Hyvä	Ei	Ei	Ei	Ei	Ei	Ei	Ei	Kyllä	Ei	Ei koskaan	Ei koskaan	En osaa sanoa	Usein	Usein	Harvoin	Usein	Usein	Usein	Joskus	Ei koskaan	Joskus	Joskus	Usein	Ei koskaan
35-44	Nainen	Ylempi korkeakoulututkinto	4	2	Täysipäiväinen	Suomi	2002	Keski-Pohjanmaa	Ei	Erikoissairaanhoidossa (esim. sairaalan neurologian poliklinikka)		MS-tauti hoitotasapainossa, ei juuri toimintakykyhaittaa				1	0	3	1	1	3	En ollenkaan	En ollenkaan	Erinomainen	Hyvä	Kyllä, suurinpiirtein	Kyllä, suurinpiirtein	Kyllä	Ei	Kyllä	Kyllä	Ei	Ei	Ei	Ei koskaan	En osaa sanoa	En osaa sanoa	Harvoin	Usein	Usein	Usein	Usein	Joskus	Usein	En osaa sanoa	Usein	Joskus	Usein	En osaa sanoa
55-64	Nainen	Toinen aste (Lukio tai ammattikoulu)	1 (Asun yksin)	0	Täysipäiväinen	Muu	2021	Itä-Uusimaa (ja HUS)	Kyllä	Erikoissairaanhoidossa (esim. sairaalan neurologian poliklinikka)	Uusi MS-tauti diagnoosi		MS-tauti hoitotasapainossa, arjen toimintakyky alentunut			2	0	6	0	3	6	En ollenkaan	Yli 7 päivää	Kohtalainen	Tyydyttävä	Ei	Kyllä, varmasti	Kyllä	Ei	Kyllä	En osaa sanoa	Kyllä	Kyllä	Ei	Harvoin	Ei koskaan	En osaa sanoa	Aina	Joskus	Joskus	Joskus	Aina	Aina	Aina	Joskus	Joskus	Harvoin	Usein	Harvoin
35-44	Nainen	Alempi korkeakoulututkinto	1 (Asun yksin)	0	Eläkkeellä (ml. työkyvyttömyyseläke)	Suomi	2014	Päijät-Häme	Kyllä	Erikoissairaanhoidossa (esim. sairaalan neurologian poliklinikka)			MS-tauti hoitotasapainossa, arjen toimintakyky alentunut			6	0	36	6	3	9	En ollenkaan	En ollenkaan	Tyydyttävä	Tyydyttävä	En osaa sanoa	Kyllä, suurinpiirtein	Ei	Ei	Ei	Kyllä	Kyllä	Kyllä	Ei	Ei koskaan	En osaa sanoa	En osaa sanoa	Aina	Joskus	Harvoin	Harvoin	Joskus	Joskus	Joskus	Ei koskaan	Joskus	Harvoin	Joskus	Ei koskaan
35-44	Nainen	Alempi korkeakoulututkinto	4	2	Täysipäiväinen	Suomi	2017	Varsinais-Suomi	Ei	Erikoissairaanhoidossa (esim. sairaalan neurologian poliklinikka)		MS-tauti hoitotasapainossa, ei juuri toimintakykyhaittaa				1	0	6	1	1	5	En ollenkaan	En ollenkaan	Hyvä	Hyvä	Kyllä, suurinpiirtein	Kyllä, suurinpiirtein	Kyllä	Ei	Ei	Kyllä	Ei	Ei	Ei	Ei koskaan	Ei koskaan	En osaa sanoa	Ei koskaan	Usein	Usein	Usein	Usein	Usein	Usein	En osaa sanoa	Usein	En osaa sanoa	Usein	En osaa sanoa
55-64	Nainen	Opistoasteen tutkinto	1 (Asun yksin)	0	Eläkkeellä (ml. työkyvyttömyyseläke)	Suomi	2004	Varsinais-Suomi	Ei	Erikoissairaanhoidossa (esim. sairaalan neurologian poliklinikka)		MS-tauti hoitotasapainossa, ei juuri toimintakykyhaittaa				1	1	0	0	1	0	En ollenkaan	En ollenkaan	Hyvä	Tyydyttävä	Ei	Ei	Kyllä	Ei	Ei	Kyllä	Ei	Kyllä	Ei	Joskus	Ei koskaan	En osaa sanoa	Usein	Usein	Ei koskaan	Usein	Usein	Usein	Usein	Ei koskaan	Harvoin	Ei koskaan	Aina	Ei koskaan
65-74	Nainen	Toinen aste (Lukio tai ammattikoulu)	1 (Asun yksin)	0	Eläkkeellä (ml. työkyvyttömyyseläke)	Suomi	1998	Itä-Uusimaa (ja HUS)	Kyllä	Erikoissairaanhoidossa (esim. sairaalan neurologian poliklinikka)			MS-tauti hoitotasapainossa, arjen toimintakyky alentunut			1	2	0	0	1	0	En ollenkaan	En ollenkaan	Kohtalainen	Hyvä	Kyllä, varmasti	Kyllä, varmasti	Ei	Kyllä	Kyllä	Kyllä	Ei	Kyllä	Kyllä	Harvoin	Ei koskaan	Aina	Harvoin	Aina	Usein	Aina	Aina	Aina	Aina	Usein	Aina	Aina	Usein	Usein
25-34	Nainen	Alempi korkeakoulututkinto	4	2	Täysipäiväinen	Suomi	2013	Varsinais-Suomi	Ei	Erikoissairaanhoidossa (esim. sairaalan neurologian poliklinikka)		MS-tauti hoitotasapainossa, ei juuri toimintakykyhaittaa				1	3	10	2	1	4	En ollenkaan	En ollenkaan	Erinomainen	Erinomainen	En osaa sanoa	Kyllä, varmasti	Kyllä	Kyllä	Ei	Kyllä	Ei	Kyllä	Ei	Ei koskaan	Ei koskaan	En osaa sanoa	Usein	Usein	Usein	Usein	Usein	Usein	Aina	En osaa sanoa	Usein	Usein	Usein	En osaa sanoa
45-54	Nainen	Alempi korkeakoulututkinto	1 (Asun yksin)	0	Eläkkeellä (ml. työkyvyttömyyseläke)	Suomi	2014	Länsi-Uusimaa (ja HUS)	Kyllä	Erikoissairaanhoidossa (esim. sairaalan neurologian poliklinikka)			MS-tauti hoitotasapainossa, arjen toimintakyky alentunut			1	0	3	0	0	2	En ollenkaan	En ollenkaan	Kohtalainen	Hyvä	Kyllä, suurinpiirtein	Kyllä, varmasti	Kyllä	Kyllä	Ei	Kyllä	En osaa sanoa	Kyllä	Kyllä	Ei koskaan	Ei koskaan	Ei koskaan	Aina	Usein	Aina	Usein	Joskus	Joskus	Usein	Usein	Usein	Usein	Usein	Joskus
45-54	Nainen	Alempi korkeakoulututkinto	4	2	Täysipäiväinen	Suomi	2017	Vantaa-Kerava (ja HUS)	Ei	Erikoissairaanhoidossa (esim. sairaalan neurologian poliklinikka)		MS-tauti hoitotasapainossa, ei juuri toimintakykyhaittaa				1	0	0	0	0	1	En ollenkaan	En ollenkaan	Hyvä	Erinomainen	Kyllä, suurinpiirtein	Kyllä, suurinpiirtein	Kyllä	Kyllä	Kyllä	Kyllä	Ei	Ei	Ei	Harvoin	Ei koskaan	En osaa sanoa	Harvoin	Aina	Aina	Aina	Aina	Aina	Aina	Usein	Aina	Aina	Aina	Harvoin
45-54	Mies	Toinen aste (Lukio tai ammattikoulu)	2	0	Täysipäiväinen	Suomi	2002	Satakunta	Ei	En osaa sanoa		MS-tauti hoitotasapainossa, ei juuri toimintakykyhaittaa				0	1	0	2	1	2	En ollenkaan	En ollenkaan	Tyydyttävä	Kohtalainen	En osaa sanoa	En osaa sanoa	Ei	Ei	Ei	Ei	Ei	Ei	Ei	En osaa sanoa	En osaa sanoa	En osaa sanoa	Joskus	En osaa sanoa	En osaa sanoa	En osaa sanoa	En osaa sanoa	En osaa sanoa	En osaa sanoa	En osaa sanoa	En osaa sanoa	En osaa sanoa	En osaa sanoa	En osaa sanoa
25-34	Nainen	Alempi korkeakoulututkinto	3	2	Osa-aikainen	Suomi	2017	Satakunta	Kyllä	Erikoissairaanhoidossa (esim. sairaalan neurologian poliklinikka)		MS-tauti hoitotasapainossa, ei juuri toimintakykyhaittaa				1	1	4	2	2	15	En ollenkaan	En ollenkaan	Tyydyttävä	Hyvä	Ei	Ei	Kyllä	Ei	Kyllä	Kyllä	Ei	Kyllä	Kyllä	Ei koskaan	Ei koskaan	En osaa sanoa	Harvoin	Usein	Joskus	Usein	Usein	Usein	Usein	Harvoin	Usein	Harvoin	Joskus	Ei koskaan
45-54	Nainen	Opistoasteen tutkinto	2	0	Opiskelija	Suomi	2019	Pohjois-Pohjanmaa	Ei	Erikoissairaanhoidossa (esim. sairaalan neurologian poliklinikka)		MS-tauti hoitotasapainossa, ei juuri toimintakykyhaittaa				0	0	0	0	0	2	En ollenkaan	En ollenkaan	Kohtalainen	Hyvä	En osaa sanoa	Kyllä, varmasti	Ei	En osaa sanoa	Ei	Kyllä	Ei	Kyllä	Ei	Harvoin	Ei koskaan	En osaa sanoa	Joskus	En osaa sanoa	Aina	Aina	Aina	Aina	Usein	Usein	Aina	Aina	Joskus	Usein
35-44	Nainen	Ylempi korkeakoulututkinto	4	2	Täysipäiväinen	Suomi	2017	Länsi-Uusimaa (ja HUS)	Kyllä	Erikoissairaanhoidossa (esim. sairaalan neurologian poliklinikka)		MS-tauti hoitotasapainossa, ei juuri toimintakykyhaittaa				1	0	30	0	1	4	En ollenkaan	Yli 7 päivää	Hyvä	Hyvä	Kyllä, suurinpiirtein	Kyllä, varmasti	Kyllä	Kyllä	Ei	Kyllä	Ei	Kyllä	Ei	Harvoin	Ei koskaan	En osaa sanoa	Joskus	Usein	Joskus	Usein	Joskus	Usein	Joskus	Harvoin	Usein	Joskus	Harvoin	Joskus
35-44	Nainen	Alempi korkeakoulututkinto	4	2	Täysipäiväinen	Suomi	2019	Pohjois-Savo	Ei	Erikoissairaanhoidossa (esim. sairaalan neurologian poliklinikka)		MS-tauti hoitotasapainossa, ei juuri toimintakykyhaittaa				1	0	20	5	2	10	En ollenkaan	En ollenkaan	Hyvä	Tyydyttävä	Kyllä, suurinpiirtein	Kyllä, suurinpiirtein	Ei	Kyllä	Ei	Kyllä	Ei	Ei	Ei	Ei koskaan	Ei koskaan	En osaa sanoa	Joskus	Usein	Aina	Joskus	Usein	Usein	Joskus	Harvoin	Harvoin	Joskus	Aina	Ei koskaan
45-54	Nainen	Ylempi korkeakoulututkinto	5 tai enemmän	3	Täysipäiväinen	Ruotsi	2010	Varsinais-Suomi	Kyllä	En osaa sanoa			MS-tauti hoitotasapainossa, arjen toimintakyky alentunut			10	0	2	1	1	1	En ollenkaan	En ollenkaan	Kohtalainen	Tyydyttävä	En osaa sanoa	Kyllä, suurinpiirtein	Ei	Ei	Ei	Ei	Kyllä	Ei	Ei	Ei koskaan	Ei koskaan	En osaa sanoa	Joskus	Usein	Joskus	Joskus	Joskus	Joskus	Usein	Ei koskaan	En osaa sanoa	Ei koskaan	En osaa sanoa	Ei koskaan
55-64	Mies	Alempi korkeakoulututkinto	2	0	Eläkkeellä (ml. työkyvyttömyyseläke)	Suomi	2004	Helsinki (ja HUS)	Kyllä	Erikoissairaanhoidossa (esim. sairaalan neurologian poliklinikka)			MS-tauti hoitotasapainossa, arjen toimintakyky alentunut			10	2	2	1	2	2	En ollenkaan	En ollenkaan	Tyydyttävä	Erinomainen	Kyllä, suurinpiirtein	Kyllä, suurinpiirtein	Kyllä	Kyllä	Kyllä	Kyllä	Ei	Ei	Kyllä	Ei koskaan	Ei koskaan	En osaa sanoa	Harvoin	Aina	Aina	Aina	Aina	Aina	Aina	Usein	Aina	Aina	Usein	Aina
18-24	Nainen	Alempi korkeakoulututkinto	2	0	Täysipäiväinen	Suomi	2019	Satakunta	Kyllä	Erikoissairaanhoidossa (esim. sairaalan neurologian poliklinikka)		MS-tauti hoitotasapainossa, ei juuri toimintakykyhaittaa				3	0	10	4	5	7	En ollenkaan	En ollenkaan	Tyydyttävä	Tyydyttävä	Kyllä, suurinpiirtein	Kyllä, suurinpiirtein	Kyllä	Kyllä	Ei	En osaa sanoa	Kyllä	Kyllä	Ei	Ei koskaan	Ei koskaan	En osaa sanoa	Aina	Harvoin	Joskus	Joskus	Joskus	Joskus	Aina	Ei koskaan	Joskus	Ei koskaan	Usein	Ei koskaan
55-64	Nainen	Toinen aste (Lukio tai ammattikoulu)	4	2	Muu	Suomi	2020	Varsinais-Suomi	Kyllä	Erikoissairaanhoidossa (esim. sairaalan neurologian poliklinikka)			MS-tauti hoitotasapainossa, arjen toimintakyky alentunut			12	1	4	1	3	3	En ollenkaan	En ollenkaan	Kohtalainen	Hyvä	Kyllä, suurinpiirtein	Kyllä, varmasti	Kyllä	Kyllä	Kyllä	Kyllä	Ei	Kyllä	Kyllä	Ei koskaan	Ei koskaan	En osaa sanoa	Usein	Aina	Aina	Aina	Usein	Usein	Aina	Usein	Usein	Usein	Usein	Usein
45-54	Nainen	Ylempi korkeakoulututkinto	2	0	Eläkkeellä (ml. työkyvyttömyyseläke)	Suomi	1995	Pirkanmaa	Ei	Perusterveydenhuollossa (esim. terveyskeskus tai - asema)			MS-tauti hoitotasapainossa, arjen toimintakyky alentunut			1	0	0	0	2	2	En ollenkaan	En ollenkaan	Huono	Kohtalainen	Ei	Kyllä, suurinpiirtein	Ei	Ei	Kyllä	Kyllä	Ei	Ei	Kyllä	Ei koskaan	Ei koskaan	En osaa sanoa	Aina	Usein	Harvoin	Usein	Usein	Usein	Usein	Ei koskaan	Usein	Usein	Joskus	Ei koskaan
45-54	Nainen	Alempi korkeakoulututkinto	1 (Asun yksin)	0	Täysipäiväinen	Suomi	2004	Satakunta	Kyllä	Erikoissairaanhoidossa (esim. sairaalan neurologian poliklinikka)		MS-tauti hoitotasapainossa, ei juuri toimintakykyhaittaa	MS-tauti hoitotasapainossa, arjen toimintakyky alentunut			3	3	5	6	4	4	En ollenkaan	En ollenkaan	Hyvä	Hyvä	Kyllä, suurinpiirtein	Kyllä, suurinpiirtein	Kyllä	Ei	Kyllä	Kyllä	Ei	Kyllä	Kyllä	Joskus	En osaa sanoa	En osaa sanoa	Usein	Usein	Usein	Aina	Aina	Aina	Aina	Usein	Aina	Aina	Joskus	Joskus
45-54	Nainen	Opistoasteen tutkinto	1 (Asun yksin)	0	Eläkkeellä (ml. työkyvyttömyyseläke)	Suomi	2008	Kanta-Häme	Kyllä	Perusterveydenhuollossa (esim. terveyskeskus tai - asema)			MS-tauti hoitotasapainossa, arjen toimintakyky alentunut			2	2	30	10	2	10	En ollenkaan	Yli 7 päivää	Kohtalainen	Erinomainen	Kyllä, suurinpiirtein	Kyllä, suurinpiirtein	Kyllä	Ei	Kyllä	Kyllä	Ei	Kyllä	Kyllä	Ei koskaan	Ei koskaan	Ei koskaan	Joskus	Aina	Aina	Aina	Aina	Aina	Usein	Usein	Aina	Usein	Aina	Joskus
35-44	Nainen	Toinen aste (Lukio tai ammattikoulu)	4	2	Eläkkeellä (ml. työkyvyttömyyseläke)	Suomi	2020	Varsinais-Suomi	Kyllä	Erikoissairaanhoidossa (esim. sairaalan neurologian poliklinikka)			MS-tauti hoitotasapainossa, arjen toimintakyky alentunut			20	2	4	0	2	1	En ollenkaan	En ollenkaan	Kohtalainen	Kohtalainen	Kyllä, suurinpiirtein	Ei	Kyllä	Ei	Kyllä	Kyllä	Kyllä	Kyllä	Kyllä	Ei koskaan	Ei koskaan	En osaa sanoa	Usein	Usein	Joskus	Joskus	Usein	Joskus	Joskus	Ei koskaan	Joskus	Ei koskaan	Joskus	Ei koskaan
45-54	Nainen	Opistoasteen tutkinto	1 (Asun yksin)	0	Eläkkeellä (ml. työkyvyttömyyseläke)	Suomi	1993	Varsinais-Suomi	Ei	Erikoissairaanhoidossa (esim. sairaalan neurologian poliklinikka)			MS-tauti hoitotasapainossa, arjen toimintakyky alentunut			55	0	2	0	3	2	En ollenkaan	En ollenkaan	Tyydyttävä	Hyvä	En osaa sanoa	Kyllä, varmasti	Kyllä	Kyllä	Kyllä	Kyllä	Kyllä	Kyllä	Kyllä	Joskus	Ei koskaan	En osaa sanoa	En osaa sanoa	Usein	En osaa sanoa	Aina	Aina	En osaa sanoa	Aina	En osaa sanoa	Usein	Usein	Usein	Joskus
45-54	Nainen	Toinen aste (Lukio tai ammattikoulu)	2	0	Eläkkeellä (ml. työkyvyttömyyseläke)	Suomi	2010	Kymenlaakso	Kyllä	Erikoissairaanhoidossa (esim. sairaalan neurologian poliklinikka)		MS-tauti hoitotasapainossa, ei juuri toimintakykyhaittaa				20	1	2	3	3	4	En ollenkaan	Yli 7 päivää	Kohtalainen	Tyydyttävä	Kyllä, suurinpiirtein	Kyllä, suurinpiirtein	Kyllä	Kyllä	Kyllä	En osaa sanoa	En osaa sanoa	Kyllä	Ei	Harvoin	Ei koskaan	En osaa sanoa	Aina	Aina	Usein	Joskus	Harvoin	Joskus	Usein	Ei koskaan	En osaa sanoa	Ei koskaan	Joskus	Joskus
55-64	Nainen	Toinen aste (Lukio tai ammattikoulu)	1 (Asun yksin)	0	Eläkkeellä (ml. työkyvyttömyyseläke)	Suomi	2010	Pohjois-Savo	Ei	En osaa sanoa			MS-tauti hoitotasapainossa, arjen toimintakyky alentunut			1	0	0	0	2	0	En ollenkaan	En ollenkaan	Huono	Huono	Kyllä, varmasti	Kyllä, varmasti	Ei	Ei	Ei	Ei	Kyllä	Kyllä	Ei	Harvoin	Harvoin	Usein	Aina	Joskus	Usein	Joskus	Joskus	Joskus	Usein	Ei koskaan	Harvoin	Joskus	Harvoin	Harvoin
45-54	Nainen	Toinen aste (Lukio tai ammattikoulu)	2	0	Eläkkeellä (ml. työkyvyttömyyseläke)	Suomi	2013	Varsinais-Suomi	Ei	Erikoissairaanhoidossa (esim. sairaalan neurologian poliklinikka)		MS-tauti hoitotasapainossa, ei juuri toimintakykyhaittaa				12	2	6	0	2	2	En ollenkaan	En ollenkaan	Tyydyttävä	Hyvä	Kyllä, suurinpiirtein	Ei	Kyllä	Kyllä	Ei	Kyllä	Ei	Ei	Ei	Ei koskaan	Ei koskaan	Ei koskaan	Usein	Harvoin	Usein	Joskus	Usein	Usein	Harvoin	Harvoin	Joskus	Joskus	Joskus	Ei koskaan
45-54	Nainen	Opistoasteen tutkinto	3	3	Eläkkeellä (ml. työkyvyttömyyseläke)	Suomi	2000	Keski-Uusimaa (ja HUS)	En osaa sanoa	Erikoissairaanhoidossa (esim. sairaalan neurologian poliklinikka)				MS-tauti ei hoitotasapainossa (esim. pahenemisvaihe)		20	2	4	1	20	2	Yli 7 päivää	Yli 7 päivää	Huono	Tyydyttävä	Kyllä, suurinpiirtein	Kyllä, suurinpiirtein	Kyllä	Kyllä	Ei	Kyllä	Ei	Kyllä	Kyllä	Joskus	Ei koskaan	Aina	Joskus	Usein	Usein	Usein	Usein	Usein	Harvoin	Usein	Usein	Usein	Usein	Usein
35-44	Nainen	Opistoasteen tutkinto	2	0	Osa-aikainen	Suomi	2021	Keski-Pohjanmaa	Ei	Erikoissairaanhoidossa (esim. sairaalan neurologian poliklinikka)			MS-tauti hoitotasapainossa, arjen toimintakyky alentunut			3	2	2	0	3	3	En ollenkaan	En ollenkaan	Hyvä	Hyvä	Kyllä, suurinpiirtein	Kyllä, varmasti	Kyllä	Kyllä	Ei	Kyllä	Ei	Ei	Kyllä	Ei koskaan	Ei koskaan	En osaa sanoa	Ei koskaan	Aina	Usein	Usein	Usein	Usein	Harvoin	Harvoin	Joskus	Ei koskaan	Usein	Usein
35-44	Nainen	Toinen aste (Lukio tai ammattikoulu)	1 (Asun yksin)	0	Täysipäiväinen	Suomi	2022	Etelä-Karjala	Ei	Erikoissairaanhoidossa (esim. sairaalan neurologian poliklinikka)		MS-tauti hoitotasapainossa, ei juuri toimintakykyhaittaa				0	0	2	0	0	1	En ollenkaan	Alle 7 päivää	Tyydyttävä	Kohtalainen	En osaa sanoa	Ei	En osaa sanoa	Ei	Ei	Ei	Kyllä	Kyllä	Ei	Ei koskaan	Ei koskaan	Ei koskaan	Usein	Usein	Ei koskaan	Harvoin	Joskus	Harvoin	Joskus	Ei koskaan	Harvoin	Ei koskaan	Ei koskaan	Ei koskaan
45-54	Nainen	Toinen aste (Lukio tai ammattikoulu)	1 (Asun yksin)	0	Eläkkeellä (ml. työkyvyttömyyseläke)	Suomi	2003	Varsinais-Suomi	Ei	Erikoissairaanhoidossa (esim. sairaalan neurologian poliklinikka)			MS-tauti hoitotasapainossa, arjen toimintakyky alentunut			47	0	6	0	2	3	En ollenkaan	En ollenkaan	Kohtalainen	Hyvä	Kyllä, suurinpiirtein	Kyllä, suurinpiirtein	Kyllä	Kyllä	Kyllä	Kyllä	Ei	Kyllä	Ei	Harvoin	Ei koskaan	En osaa sanoa	Joskus	Usein	Usein	Usein	Usein	Usein	Usein	Joskus	Usein	Joskus	En osaa sanoa	Usein
55-64	Nainen	Alempi korkeakoulututkinto	1 (Asun yksin)	0	Eläkkeellä (ml. työkyvyttömyyseläke)	Suomi	2014	Länsi-Uusimaa (ja HUS)	Ei	Erikoissairaanhoidossa (esim. sairaalan neurologian poliklinikka)			MS-tauti hoitotasapainossa, arjen toimintakyky alentunut			0	2	2	2	0	4	En ollenkaan	En ollenkaan	Tyydyttävä	Huono	En osaa sanoa	Kyllä, suurinpiirtein	Kyllä	Ei	Kyllä	Ei	Kyllä	Kyllä	Ei	En osaa sanoa	Ei koskaan	En osaa sanoa	Aina	Joskus	Joskus	Ei koskaan	Joskus	En osaa sanoa	Usein	Ei koskaan	Joskus	Ei koskaan	Joskus	Joskus
25-34	Mies	Alempi korkeakoulututkinto	2	0	Opiskelija	Suomi	2020	Helsinki (ja HUS)	Ei	Erikoissairaanhoidossa (esim. sairaalan neurologian poliklinikka)			MS-tauti hoitotasapainossa, arjen toimintakyky alentunut	MS-tauti ei hoitotasapainossa (esim. pahenemisvaihe)		4	2	3	0	6	3	En ollenkaan	Yli 7 päivää	Kohtalainen	Hyvä	Kyllä, suurinpiirtein	Kyllä, suurinpiirtein	Kyllä	Kyllä	Ei	Kyllä	Kyllä	Kyllä	Ei	Ei koskaan	Ei koskaan	En osaa sanoa	Joskus	Usein	Usein	Aina	Aina	Aina	Usein	Ei koskaan	En osaa sanoa	Harvoin	Joskus	Aina
35-44	Nainen	Ylempi korkeakoulututkinto	2	0	Täysipäiväinen	Suomi	2012	Varsinais-Suomi	Ei	Erikoissairaanhoidossa (esim. sairaalan neurologian poliklinikka)		MS-tauti hoitotasapainossa, ei juuri toimintakykyhaittaa				1	0	8	2	4	3	En ollenkaan	En ollenkaan	Erinomainen	Hyvä	Kyllä, suurinpiirtein	Ei	Kyllä	Ei	Ei	Kyllä	Ei	Ei	Ei	Usein	Ei koskaan	En osaa sanoa	Joskus	Usein	Usein	Usein	Usein	Usein	Usein	Joskus	Usein	Joskus	Usein	En osaa sanoa
45-54	Mies	Toinen aste (Lukio tai ammattikoulu)	4	1	Eläkkeellä (ml. työkyvyttömyyseläke)	Suomi	2013	Kymenlaakso	Ei	Erikoissairaanhoidossa (esim. sairaalan neurologian poliklinikka)			MS-tauti hoitotasapainossa, arjen toimintakyky alentunut			50	2	1	2	2	1	En halua sanoa	En ollenkaan	Huono	Hyvä	Kyllä, varmasti	Kyllä, varmasti	Kyllä	Kyllä	Kyllä	Kyllä	Ei	Ei	En osaa sanoa	Ei koskaan	Ei koskaan	Ei koskaan	Harvoin	Aina	Joskus	Aina	Aina	Aina	Aina	Harvoin	Aina	Aina	Aina	En osaa sanoa
35-44	Nainen	Opistoasteen tutkinto	4	1	Osa-aikainen	Suomi	2017	Pohjois-Savo	Kyllä	Erikoissairaanhoidossa (esim. sairaalan neurologian poliklinikka)			MS-tauti hoitotasapainossa, arjen toimintakyky alentunut			2	0	2	0	2	1	En ollenkaan	En ollenkaan	Kohtalainen	Hyvä	Ei	Ei	Kyllä	Kyllä	Kyllä	Kyllä	En osaa sanoa	Kyllä	Ei	En osaa sanoa	En osaa sanoa	En osaa sanoa	Usein	Usein	En osaa sanoa	Joskus	Usein	Usein	Usein	Usein	Aina	Aina	Aina	En osaa sanoa
45-54	Mies	Toinen aste (Lukio tai ammattikoulu)	2	0	Eläkkeellä (ml. työkyvyttömyyseläke)	Suomi	2016	Varsinais-Suomi	Ei	Erikoissairaanhoidossa (esim. sairaalan neurologian poliklinikka)		MS-tauti hoitotasapainossa, ei juuri toimintakykyhaittaa				1	3	0	0	2	0	En ollenkaan	En ollenkaan	Hyvä	Hyvä	Kyllä, suurinpiirtein	Kyllä, suurinpiirtein	Kyllä	Kyllä	Kyllä	Kyllä	Ei	Ei	Kyllä	Ei koskaan	Ei koskaan	En osaa sanoa	Joskus	Usein	En osaa sanoa	Usein	Aina	Aina	Aina	Usein	Usein	Usein	Usein	Joskus
65-74	Nainen	Opistoasteen tutkinto	2	0	Eläkkeellä (ml. työkyvyttömyyseläke)	Suomi	2020	Etelä-Pohjanmaa	Kyllä	Erikoissairaanhoidossa (esim. sairaalan neurologian poliklinikka)			MS-tauti hoitotasapainossa, arjen toimintakyky alentunut			3	0	4	4	2	5	Alle 7 päivää	Yli 7 päivää	Huono	Hyvä	Kyllä, varmasti	Kyllä, varmasti	Kyllä	Kyllä	Kyllä	Kyllä	Ei	Kyllä	Kyllä	Harvoin	Ei koskaan	Aina	Ei koskaan	Aina	Usein	Usein	Aina	Aina	Aina	Aina	Aina	Aina	Joskus	Usein
75 tai vanhempi	Mies	Ylempi korkeakoulututkinto	2	0	Eläkkeellä (ml. työkyvyttömyyseläke)	Suomi	1981	Päijät-Häme	Ei	Erikoissairaanhoidossa (esim. sairaalan neurologian poliklinikka)			MS-tauti hoitotasapainossa, arjen toimintakyky alentunut			1	0	20	0	22	3	En ollenkaan	Yli 7 päivää	Kohtalainen	Huono	Ei	Kyllä, suurinpiirtein	Ei	Ei	Ei	Kyllä	Ei	Kyllä	Ei	Harvoin	Ei koskaan	Aina	Harvoin	Usein	Ei koskaan	Usein	Usein	Usein	Usein	Usein	Usein	Usein	En osaa sanoa	Harvoin
45-54	Nainen	Alempi korkeakoulututkinto	1 (Asun yksin)	0	Eläkkeellä (ml. työkyvyttömyyseläke)	Suomi	2017	Varsinais-Suomi	Kyllä	Perusterveydenhuollossa (esim. terveyskeskus tai - asema)			MS-tauti hoitotasapainossa, arjen toimintakyky alentunut			1	1	27	0	4	20	En ollenkaan	En ollenkaan	Huono	Kohtalainen	Ei	Ei	Kyllä	Kyllä	Kyllä	En osaa sanoa	Kyllä	Kyllä	Kyllä	Harvoin	Ei koskaan	En osaa sanoa	Aina	Usein	Aina	Joskus	Usein	Usein	Aina	Joskus	Harvoin	Harvoin	Harvoin	Joskus
55-64	Nainen	Alempi korkeakoulututkinto	3	0	Eläkkeellä (ml. työkyvyttömyyseläke)	Suomi	2005	Varsinais-Suomi	Ei	Perusterveydenhuollossa (esim. terveyskeskus tai - asema)			MS-tauti hoitotasapainossa, arjen toimintakyky alentunut			0	2	4	2	2	5	En ollenkaan	En ollenkaan	Hyvä	Kohtalainen	Kyllä, varmasti	Kyllä, varmasti	Kyllä	Kyllä	Kyllä	Kyllä	Kyllä	Kyllä	Ei	Joskus	Ei koskaan	En osaa sanoa	Usein	Usein	En osaa sanoa	Aina	Aina	Aina	En osaa sanoa	Ei koskaan	Usein	Usein	Ei koskaan	Joskus
45-54	Mies	Joku muu	2	0	Eläkkeellä (ml. työkyvyttömyyseläke)	Suomi	2012	Vantaa-Kerava (ja HUS)	Ei	Erikoissairaanhoidossa (esim. sairaalan neurologian poliklinikka)			MS-tauti hoitotasapainossa, arjen toimintakyky alentunut			1	0	0	0	1	0	En ollenkaan	En ollenkaan	Kohtalainen	Kohtalainen	Ei	Kyllä, suurinpiirtein	Ei	Kyllä	Ei	Kyllä	Ei	Ei	Ei	Ei koskaan	Ei koskaan	Ei koskaan	Aina	Joskus	Harvoin	Usein	Usein	Usein	Joskus	Ei koskaan	Harvoin	Ei koskaan	Harvoin	Ei koskaan
55-64	Nainen	Ylempi korkeakoulututkinto	2	0	Osa-aikainen	Suomi	2016	Pohjois-Pohjanmaa	Kyllä	Erikoissairaanhoidossa (esim. sairaalan neurologian poliklinikka)				MS-tauti ei hoitotasapainossa (esim. pahenemisvaihe)		14	2	7	1	8	6	En ollenkaan	En ollenkaan	Kohtalainen	Kohtalainen	Ei	Kyllä, suurinpiirtein	Kyllä	Ei	Ei	Kyllä	Kyllä	Kyllä	Ei	Ei koskaan	Ei koskaan	En osaa sanoa	Usein	Joskus	Joskus	Joskus	Joskus	Joskus	Usein	Ei koskaan	Ei koskaan	Ei koskaan	Usein	Ei koskaan
25-34	Nainen	Ylempi korkeakoulututkinto	1 (Asun yksin)	0	Täysipäiväinen	Suomi	2022	Helsinki (ja HUS)	Ei	Erikoissairaanhoidossa (esim. sairaalan neurologian poliklinikka)		MS-tauti hoitotasapainossa, ei juuri toimintakykyhaittaa				2	4	1	0	3	1	En ollenkaan	En ollenkaan	Hyvä	Hyvä	En osaa sanoa	Kyllä, suurinpiirtein	Kyllä	En osaa sanoa	Kyllä	Kyllä	Ei	En osaa sanoa	Ei	Harvoin	Ei koskaan	En osaa sanoa	En osaa sanoa	Usein	Harvoin	Usein	Usein	Usein	En osaa sanoa	Ei koskaan	En osaa sanoa	Ei koskaan	Usein	Ei koskaan
45-54	Nainen	Ylempi korkeakoulututkinto	4	2	Täysipäiväinen	Suomi	2010	Pohjanmaa	Ei	En osaa sanoa		MS-tauti hoitotasapainossa, ei juuri toimintakykyhaittaa				0	2	0	0	1	0	En ollenkaan	En ollenkaan	Tyydyttävä	Tyydyttävä	En osaa sanoa	En osaa sanoa	En osaa sanoa	En osaa sanoa	Kyllä	En osaa sanoa	Ei	Ei	Ei	En osaa sanoa	Ei koskaan	En osaa sanoa	Usein	Harvoin	Joskus	Joskus	Joskus	Joskus	Joskus	Ei koskaan	Ei koskaan	Joskus	Joskus	Ei koskaan
65-74	Nainen	Opistoasteen tutkinto	2	0	Eläkkeellä (ml. työkyvyttömyyseläke)	Suomi	2012	Kanta-Häme	Kyllä	Perusterveydenhuollossa (esim. terveyskeskus tai - asema)			MS-tauti hoitotasapainossa, arjen toimintakyky alentunut			11	0	4	0	0	14	En ollenkaan	En ollenkaan	Huono	Erinomainen	Kyllä, suurinpiirtein	Kyllä, varmasti	Ei	Ei	Ei	Kyllä	Ei	Ei	Kyllä	Ei koskaan	Ei koskaan	En osaa sanoa	Harvoin	Usein	Harvoin	Usein	Usein	Aina	Aina	Usein	Usein	Usein	Aina	Harvoin
35-44	Nainen	Opistoasteen tutkinto	2	1	Muu	Suomi	2020	Varsinais-Suomi	Kyllä	Erikoissairaanhoidossa (esim. sairaalan neurologian poliklinikka)			MS-tauti hoitotasapainossa, arjen toimintakyky alentunut			12	0	4	2	10	1	En ollenkaan	Alle 7 päivää	Tyydyttävä	Tyydyttävä	Kyllä, suurinpiirtein	Kyllä, suurinpiirtein	Kyllä	Ei	Kyllä	Kyllä	Kyllä	En osaa sanoa	Ei	Joskus	Ei koskaan	En osaa sanoa	Joskus	Joskus	Harvoin	Joskus	Joskus	Joskus	Joskus	Ei koskaan	Joskus	Usein	Joskus	Ei koskaan
55-64	Nainen	Alempi korkeakoulututkinto	2	0	Eläkkeellä (ml. työkyvyttömyyseläke)	Suomi	2005	Pohjois-Pohjanmaa	Kyllä	Erikoissairaanhoidossa (esim. sairaalan neurologian poliklinikka)			MS-tauti hoitotasapainossa, arjen toimintakyky alentunut			0	0	1	0	0	1	En ollenkaan	En ollenkaan	Kohtalainen	Huono	Kyllä, suurinpiirtein	Kyllä, suurinpiirtein	Kyllä	Kyllä	Ei	Ei	En osaa sanoa	Kyllä	Ei	Ei koskaan	Ei koskaan	En osaa sanoa	Aina	Harvoin	Usein	Joskus	Joskus	Joskus	Harvoin	Ei koskaan	Harvoin	Harvoin	Harvoin	Harvoin
35-44	Nainen	Ylempi korkeakoulututkinto	2	1	Täysipäiväinen	Suomi	2017	Kanta-Häme	Ei	Erikoissairaanhoidossa (esim. sairaalan neurologian poliklinikka)		MS-tauti hoitotasapainossa, ei juuri toimintakykyhaittaa				1	0	0	0	1	1	En ollenkaan	En ollenkaan	Hyvä	Hyvä	Kyllä, suurinpiirtein	Kyllä, suurinpiirtein	Kyllä	Kyllä	Kyllä	Kyllä	Ei	Ei	Ei	Ei koskaan	Ei koskaan	Ei koskaan	Harvoin	Aina	Usein	Aina	Aina	Aina	Aina	Joskus	Usein	Usein	En osaa sanoa	Harvoin
35-44	Mies	Ylempi korkeakoulututkinto	4	2	Täysipäiväinen	Suomi	2010	Länsi-Uusimaa (ja HUS)	Ei	Erikoissairaanhoidossa (esim. sairaalan neurologian poliklinikka)		MS-tauti hoitotasapainossa, ei juuri toimintakykyhaittaa				14	5	6	2	5	6	En ollenkaan	En ollenkaan	Hyvä	Hyvä	Kyllä, suurinpiirtein	Kyllä, suurinpiirtein	Ei	Ei	Kyllä	Kyllä	Ei	Kyllä	Ei	Joskus	Ei koskaan	Ei koskaan	Joskus	Usein	Usein	Usein	Joskus	Joskus	Usein	Harvoin	Joskus	Joskus	Usein	Harvoin
45-54	Nainen	Tutkijakoulutus	4	2	Osa-aikainen	Suomi	2015	Keski-Suomi	Kyllä	Erikoissairaanhoidossa (esim. sairaalan neurologian poliklinikka)			MS-tauti hoitotasapainossa, arjen toimintakyky alentunut			2	0	8	5	2	5	En ollenkaan	En ollenkaan	Tyydyttävä	Tyydyttävä	Kyllä, suurinpiirtein	Kyllä, suurinpiirtein	Kyllä	Ei	Ei	Kyllä	Kyllä	Kyllä	Ei	Ei koskaan	Ei koskaan	En osaa sanoa	Aina	Harvoin	Ei koskaan	Usein	Joskus	Harvoin	Usein	Ei koskaan	Ei koskaan	Ei koskaan	Joskus	Ei koskaan
45-54	Nainen	Alempi korkeakoulututkinto	2	0	Osa-aikainen	Suomi	2001	Keski-Suomi	Kyllä	Erikoissairaanhoidossa (esim. sairaalan neurologian poliklinikka)			MS-tauti hoitotasapainossa, arjen toimintakyky alentunut			3	0	6	3	3	6	En ollenkaan	Yli 7 päivää	Tyydyttävä	Tyydyttävä	En osaa sanoa	Kyllä, suurinpiirtein	Kyllä	Ei	Kyllä	Kyllä	Kyllä	Kyllä	Ei	Ei koskaan	Harvoin	Aina	Usein	Usein	Harvoin	Usein	Joskus	En osaa sanoa	Usein	Ei koskaan	Harvoin	En osaa sanoa	En osaa sanoa	En osaa sanoa
35-44	Nainen	Toinen aste (Lukio tai ammattikoulu)	4	2	Eläkkeellä (ml. työkyvyttömyyseläke)	Suomi	2015	Länsi-Uusimaa (ja HUS)	Ei	Erikoissairaanhoidossa (esim. sairaalan neurologian poliklinikka)			MS-tauti hoitotasapainossa, arjen toimintakyky alentunut			1	2	0	0	1	1	En ollenkaan	Alle 7 päivää	Tyydyttävä	Erinomainen	Kyllä, varmasti	Kyllä, varmasti	Kyllä	Ei	En osaa sanoa	Kyllä	Ei	Kyllä	Ei	Harvoin	Ei koskaan	En osaa sanoa	Ei koskaan	Aina	Aina	Aina	Aina	Aina	Aina	Ei koskaan	Aina	En osaa sanoa	Aina	Ei koskaan
35-44	Mies	En halua sanoa	1 (Asun yksin)	0	Täysipäiväinen	Suomi	2011	Helsinki (ja HUS)	Kyllä	Erikoissairaanhoidossa (esim. sairaalan neurologian poliklinikka)		MS-tauti hoitotasapainossa, ei juuri toimintakykyhaittaa				1	1	5	2	2	4	En ollenkaan	En ollenkaan	Hyvä	Erinomainen	Kyllä, suurinpiirtein	Ei	Kyllä	Kyllä	Kyllä	Kyllä	Ei	Kyllä	Ei	Ei koskaan	Ei koskaan	Harvoin	Harvoin	Aina	Joskus	Aina	Aina	Aina	Aina	Joskus	Aina	Aina	Usein	Joskus
55-64	Nainen	Opistoasteen tutkinto	2	0	Eläkkeellä (ml. työkyvyttömyyseläke)	Suomi	2019	Kymenlaakso	Ei	Erikoissairaanhoidossa (esim. sairaalan neurologian poliklinikka)			MS-tauti hoitotasapainossa, arjen toimintakyky alentunut			43	1	3	0	5	3	En ollenkaan	En ollenkaan	Tyydyttävä	Hyvä	Kyllä, suurinpiirtein	Kyllä, suurinpiirtein	Kyllä	Kyllä	Kyllä	Kyllä	Kyllä	Kyllä	Ei	Ei koskaan	Ei koskaan	En osaa sanoa	Usein	Aina	Harvoin	Joskus	Usein	Usein	Usein	Ei koskaan	Harvoin	Harvoin	Joskus	Ei koskaan
45-54	Nainen	Alempi korkeakoulututkinto	2	0	Täysipäiväinen	Suomi	1993	Pohjois-Pohjanmaa	Ei	Erikoissairaanhoidossa (esim. sairaalan neurologian poliklinikka)		MS-tauti hoitotasapainossa, ei juuri toimintakykyhaittaa				0	0	3	2	0	3	En ollenkaan	En ollenkaan	Tyydyttävä	Tyydyttävä	Ei	Ei	En osaa sanoa	Kyllä	Ei	Kyllä	Ei	Ei	Ei	En osaa sanoa	En osaa sanoa	En osaa sanoa	En osaa sanoa	En osaa sanoa	En osaa sanoa	En osaa sanoa	En osaa sanoa	En osaa sanoa	En osaa sanoa	En osaa sanoa	En osaa sanoa	En osaa sanoa	En osaa sanoa	En osaa sanoa
45-54	Mies	Toinen aste (Lukio tai ammattikoulu)	1 (Asun yksin)	0	Eläkkeellä (ml. työkyvyttömyyseläke)	Suomi	2011	Varsinais-Suomi	Ei	En osaa sanoa			MS-tauti hoitotasapainossa, arjen toimintakyky alentunut			11	2	5	2	3	5	En ollenkaan	En ollenkaan	Kohtalainen	Kohtalainen	Ei	Kyllä, suurinpiirtein	Kyllä	Kyllä	Kyllä	Ei	Kyllä	Kyllä	Ei	Harvoin	Ei koskaan	En osaa sanoa	Joskus	Harvoin	Harvoin	Joskus	Joskus	En osaa sanoa	Usein	En osaa sanoa	En osaa sanoa	Harvoin	Harvoin	En osaa sanoa
45-54	Nainen	Opistoasteen tutkinto	3	1	Työtön	Suomi	2018	Päijät-Häme	Ei	Erikoissairaanhoidossa (esim. sairaalan neurologian poliklinikka)		MS-tauti hoitotasapainossa, ei juuri toimintakykyhaittaa				1	2	4	0	2	2	En ollenkaan	En ollenkaan	Hyvä	Hyvä	Kyllä, suurinpiirtein	Kyllä, suurinpiirtein	Kyllä	Kyllä	Ei	Kyllä	Ei	Ei	Ei	Ei koskaan	Ei koskaan	En osaa sanoa	Ei koskaan	Aina	Aina	Aina	Aina	Aina	Aina	Joskus	Aina	Aina	Aina	Ei koskaan
55-64	Mies	Toinen aste (Lukio tai ammattikoulu)	1 (Asun yksin)	0	Eläkkeellä (ml. työkyvyttömyyseläke)	Suomi	2007	Keski-Uusimaa (ja HUS)	Ei	Erikoissairaanhoidossa (esim. sairaalan neurologian poliklinikka)			MS-tauti hoitotasapainossa, arjen toimintakyky alentunut			1	0	1	0	1	1	En ollenkaan	En ollenkaan	Huono	Kohtalainen	Ei	Ei	Kyllä	Ei	Ei	Ei	En osaa sanoa	Kyllä	Kyllä	Harvoin	Ei koskaan	En osaa sanoa	Usein	Aina	Ei koskaan	Aina	Aina	Harvoin	Aina	Ei koskaan	Aina	Harvoin	Aina	Usein
35-44	Nainen	Ylempi korkeakoulututkinto	3	1	Täysipäiväinen	Suomi	2008	Länsi-Uusimaa (ja HUS)	Kyllä	Erikoissairaanhoidossa (esim. sairaalan neurologian poliklinikka)		MS-tauti hoitotasapainossa, ei juuri toimintakykyhaittaa				1	1	3	1	1	4	En ollenkaan	En ollenkaan	Tyydyttävä	Erinomainen	Kyllä, suurinpiirtein	Kyllä, varmasti	Kyllä	Kyllä	Kyllä	Kyllä	Ei	Ei	Kyllä	Ei koskaan	Ei koskaan	En osaa sanoa	Harvoin	Usein	Ei koskaan	Aina	Aina	Aina	Aina	Usein	Aina	Usein	Usein	Harvoin
55-64	Nainen	Alempi korkeakoulututkinto	1 (Asun yksin)	0	Eläkkeellä (ml. työkyvyttömyyseläke)	Suomi	1993	Pohjois-Savo	Ei	Erikoissairaanhoidossa (esim. sairaalan neurologian poliklinikka)			MS-tauti hoitotasapainossa, arjen toimintakyky alentunut			1	0	2	0	2	2	En ollenkaan	Yli 7 päivää	Kohtalainen	Tyydyttävä	Kyllä, suurinpiirtein	Kyllä, suurinpiirtein	Ei	Ei	Kyllä	Kyllä	Kyllä	Ei	Ei	Harvoin	Ei koskaan	Aina	Joskus	Joskus	Usein	Joskus	Usein	Aina	Joskus	Ei koskaan	Joskus	Joskus	Joskus	Usein
55-64	Mies	Toinen aste (Lukio tai ammattikoulu)	4	2	Täysipäiväinen	Suomi	2015	Pirkanmaa	Ei	Erikoissairaanhoidossa (esim. sairaalan neurologian poliklinikka)		MS-tauti hoitotasapainossa, ei juuri toimintakykyhaittaa				6	4	2	0	4	2	Alle 7 päivää	En ollenkaan	Tyydyttävä	Hyvä	En osaa sanoa	Kyllä, suurinpiirtein	Kyllä	Kyllä	Kyllä	Kyllä	Ei	Ei	Kyllä	Ei koskaan	Ei koskaan	En osaa sanoa	Joskus	Aina	Usein	Aina	Aina	Aina	Aina	Joskus	Aina	Aina	Aina	Ei koskaan
25-34	Nainen	Alempi korkeakoulututkinto	1 (Asun yksin)	0	Täysipäiväinen	Suomi	2017	Satakunta	Ei	Erikoissairaanhoidossa (esim. sairaalan neurologian poliklinikka)		MS-tauti hoitotasapainossa, ei juuri toimintakykyhaittaa				2	4	1	1	2	1	En ollenkaan	En ollenkaan	Erinomainen	Hyvä	Ei	Kyllä, varmasti	Kyllä	Kyllä	Kyllä	En osaa sanoa	Kyllä	Kyllä	Ei	Usein	Harvoin	En osaa sanoa	Usein	Usein	Aina	Aina	Usein	Usein	Usein	Harvoin	Usein	Usein	Usein	Ei koskaan
45-54	Nainen	Opistoasteen tutkinto	2	0	Täysipäiväinen	Suomi	2012	Pohjanmaa	Kyllä	Erikoissairaanhoidossa (esim. sairaalan neurologian poliklinikka)		MS-tauti hoitotasapainossa, ei juuri toimintakykyhaittaa				0	2	12	4	0	12	En ollenkaan	En ollenkaan	Hyvä	Huono	En osaa sanoa	Ei	Ei	Ei	Kyllä	Kyllä	En osaa sanoa	Kyllä	Kyllä	Aina	Harvoin	Ei koskaan	Usein	Joskus	Harvoin	Usein	Harvoin	Harvoin	Harvoin	Ei koskaan	Usein	Harvoin	Harvoin	Ei koskaan
25-34	Nainen	Toinen aste (Lukio tai ammattikoulu)	1 (Asun yksin)	0	Osa-aikainen	Suomi	2023	Varsinais-Suomi	Ei	Erikoissairaanhoidossa (esim. sairaalan neurologian poliklinikka)	Uusi MS-tauti diagnoosi					8	2	0	0	12	0	En ollenkaan	En ollenkaan	Tyydyttävä	Hyvä	En osaa sanoa	En osaa sanoa	Kyllä	Ei	Kyllä	Kyllä	Ei	Kyllä	Ei	Ei koskaan	Ei koskaan	En osaa sanoa	Joskus	En osaa sanoa	Harvoin	Usein	Joskus	Joskus	Usein	Ei koskaan	Joskus	Ei koskaan	En osaa sanoa	Usein
45-54	Mies	Toinen aste (Lukio tai ammattikoulu)	4	2	Eläkkeellä (ml. työkyvyttömyyseläke)	Suomi	2018	Helsinki (ja HUS)	Ei	Erikoissairaanhoidossa (esim. sairaalan neurologian poliklinikka)			MS-tauti hoitotasapainossa, arjen toimintakyky alentunut			15	2	2	0	2	2	En ollenkaan	En ollenkaan	Kohtalainen	Hyvä	Kyllä, suurinpiirtein	Kyllä, suurinpiirtein	Ei	Ei	Kyllä	Kyllä	Ei	Ei	Ei	Harvoin	Ei koskaan	En osaa sanoa	Joskus	Usein	Usein	Usein	Usein	Usein	Joskus	Harvoin	Usein	Usein	Usein	Joskus
35-44	Nainen	Toinen aste (Lukio tai ammattikoulu)	1 (Asun yksin)	0	Eläkkeellä (ml. työkyvyttömyyseläke)	Suomi	2021	Helsinki (ja HUS)	Kyllä	Erikoissairaanhoidossa (esim. sairaalan neurologian poliklinikka)				MS-tauti ei hoitotasapainossa (esim. pahenemisvaihe)		1	5	10	0	0	2	En ollenkaan	En ollenkaan	Huono	Hyvä	Kyllä, suurinpiirtein	Kyllä, varmasti	Kyllä	Kyllä	Kyllä	Kyllä	Ei	Kyllä	Kyllä	Ei koskaan	Ei koskaan	En osaa sanoa	Ei koskaan	Ei koskaan	Aina	Aina	Aina	Aina	Aina	Ei koskaan	En osaa sanoa	Ei koskaan	Ei koskaan	Ei koskaan
45-54	Nainen	Opistoasteen tutkinto	4	1	Osa-aikainen	Suomi	2020	Vantaa-Kerava (ja HUS)	Ei	Erikoissairaanhoidossa (esim. sairaalan neurologian poliklinikka)			MS-tauti hoitotasapainossa, arjen toimintakyky alentunut			4	0	2	1	3	3	En ollenkaan	En ollenkaan	Tyydyttävä	Hyvä	Ei	Kyllä, suurinpiirtein	Kyllä	Kyllä	Ei	Kyllä	Ei	Kyllä	Ei	Ei koskaan	Ei koskaan	Usein	Usein	Joskus	Joskus	Usein	Usein	Usein	Usein	Harvoin	Joskus	Usein	Joskus	Ei koskaan
45-54	Nainen	Ylempi korkeakoulututkinto	3	1	Osa-aikainen	Suomi	2019	Pohjois-Pohjanmaa	Kyllä	Erikoissairaanhoidossa (esim. sairaalan neurologian poliklinikka)			MS-tauti hoitotasapainossa, arjen toimintakyky alentunut			2	1	7	5	2	5	En ollenkaan	Alle 7 päivää	Huono	Huono	En osaa sanoa	En osaa sanoa	Kyllä	Ei	Ei	Ei	Kyllä	Kyllä	Ei	Joskus	Ei koskaan	En osaa sanoa	Aina	Harvoin	Harvoin	Joskus	Harvoin	Joskus	Joskus	Harvoin	Joskus	Ei koskaan	Ei koskaan	Ei koskaan
45-54	Nainen	Ylempi korkeakoulututkinto	2	0	Eläkkeellä (ml. työkyvyttömyyseläke)	Suomi	2013	Kymenlaakso	Kyllä	Erikoissairaanhoidossa (esim. sairaalan neurologian poliklinikka)			MS-tauti hoitotasapainossa, arjen toimintakyky alentunut			40	0	10	1	3	8	En ollenkaan	Alle 7 päivää	Tyydyttävä	Hyvä	Kyllä, suurinpiirtein	Kyllä, suurinpiirtein	Ei	Ei	Kyllä	Kyllä	Ei	Kyllä	Ei	Ei koskaan	Ei koskaan	Ei koskaan	Usein	Usein	Aina	Aina	Aina	Aina	Aina	Joskus	Aina	Usein	Aina	Aina
55-64	Nainen	Alempi korkeakoulututkinto	1 (Asun yksin)	0	Osa-aikainen	Suomi	2010	Pohjois-Karjala	Ei	Erikoissairaanhoidossa (esim. sairaalan neurologian poliklinikka)		MS-tauti hoitotasapainossa, ei juuri toimintakykyhaittaa				0	0	0	0	0	0	En ollenkaan	En ollenkaan	Hyvä	Hyvä	En osaa sanoa	En osaa sanoa	Kyllä	Kyllä	Ei	Kyllä	Ei	Ei	Ei	En osaa sanoa	En osaa sanoa	En osaa sanoa	En osaa sanoa	En osaa sanoa	En osaa sanoa	En osaa sanoa	En osaa sanoa	En osaa sanoa	En osaa sanoa	En osaa sanoa	En osaa sanoa	En osaa sanoa	Usein	En osaa sanoa
55-64	Nainen	Opistoasteen tutkinto	2	0	Osa-aikainen	Suomi	2017	Pirkanmaa	Ei	Erikoissairaanhoidossa (esim. sairaalan neurologian poliklinikka)			MS-tauti hoitotasapainossa, arjen toimintakyky alentunut			8	0	2	0	3	0	En ollenkaan	En ollenkaan	Kohtalainen	Hyvä	Ei	En osaa sanoa	Kyllä	Kyllä	Ei	Kyllä	Ei	Kyllä	Kyllä	Ei koskaan	En osaa sanoa	En osaa sanoa	Joskus	Usein	Harvoin	Usein	Usein	Joskus	Usein	Harvoin	Harvoin	Harvoin	Joskus	Harvoin
65-74	Mies	Ylempi korkeakoulututkinto	1 (Asun yksin)	0	Eläkkeellä (ml. työkyvyttömyyseläke)	Suomi	2001	Helsinki (ja HUS)	Ei	Yksityisellä poliklinikalla (esim. yksityinen neurologi)		MS-tauti hoitotasapainossa, ei juuri toimintakykyhaittaa				0	0	0	5	1	0	En ollenkaan	En ollenkaan	Hyvä	Erinomainen	Kyllä, varmasti	Kyllä, varmasti	Kyllä	Kyllä	Kyllä	Kyllä	Ei	Ei	Kyllä	Ei koskaan	Ei koskaan	En osaa sanoa	Ei koskaan	Aina	Aina	Aina	Aina	Aina	Aina	En osaa sanoa	Aina	Aina	Aina	Aina
45-54	Mies	Toinen aste (Lukio tai ammattikoulu)	1 (Asun yksin)	0	Eläkkeellä (ml. työkyvyttömyyseläke)	Ruotsi	1999	Varsinais-Suomi	Ei	Erikoissairaanhoidossa (esim. sairaalan neurologian poliklinikka)			MS-tauti hoitotasapainossa, arjen toimintakyky alentunut			50	0	1	0	2	1	En ollenkaan	Yli 7 päivää	Kohtalainen	Tyydyttävä	Kyllä, suurinpiirtein	Kyllä, suurinpiirtein	Kyllä	Ei	En osaa sanoa	En osaa sanoa	Kyllä	Ei	Ei	En osaa sanoa	En osaa sanoa	En osaa sanoa	Usein	Harvoin	Harvoin	Usein	Joskus	Joskus	Usein	Ei koskaan	Joskus	Joskus	Joskus	Ei koskaan
55-64	Mies	Toinen aste (Lukio tai ammattikoulu)	2	0	Eläkkeellä (ml. työkyvyttömyyseläke)	Suomi	1993	Pirkanmaa	Ei	Perusterveydenhuollossa (esim. terveyskeskus tai - asema)		MS-tauti hoitotasapainossa, ei juuri toimintakykyhaittaa				1	0	5	1	1	7	En ollenkaan	En ollenkaan	Kohtalainen	Tyydyttävä	Ei	Ei	Kyllä	Ei	Ei	En osaa sanoa	Ei	Kyllä	Ei	En osaa sanoa	Ei koskaan	En osaa sanoa	Usein	Joskus	Harvoin	Usein	Aina	Joskus	Joskus	Harvoin	En osaa sanoa	Harvoin	Joskus	En osaa sanoa
45-54	Mies	Opistoasteen tutkinto	2	0	Eläkkeellä (ml. työkyvyttömyyseläke)	Suomi	2019	Kanta-Häme	Ei	Erikoissairaanhoidossa (esim. sairaalan neurologian poliklinikka)		MS-tauti hoitotasapainossa, ei juuri toimintakykyhaittaa				1	9	1	1	2	2	En ollenkaan	En ollenkaan	Tyydyttävä	Erinomainen	Kyllä, varmasti	En osaa sanoa	Kyllä	Kyllä	Kyllä	Kyllä	Ei	Ei	Ei	En osaa sanoa	En osaa sanoa	En osaa sanoa	Joskus	Aina	Usein	Aina	Aina	Aina	Aina	Usein	Aina	Aina	Usein	Usein
55-64	Nainen	Toinen aste (Lukio tai ammattikoulu)	2	0	Eläkkeellä (ml. työkyvyttömyyseläke)	Suomi	2007	Kymenlaakso	Ei	Erikoissairaanhoidossa (esim. sairaalan neurologian poliklinikka)			MS-tauti hoitotasapainossa, arjen toimintakyky alentunut			0	0	4	2	0	3	En ollenkaan	En ollenkaan	Tyydyttävä	Hyvä	Kyllä, suurinpiirtein	Ei	En osaa sanoa	Ei	Kyllä	Kyllä	Ei	Kyllä	Ei	Harvoin	Ei koskaan	En osaa sanoa	Harvoin	Joskus	Joskus	Usein	Joskus	Joskus	Joskus	Ei koskaan	Joskus	Ei koskaan	Joskus	Ei koskaan
45-54	Mies	Toinen aste (Lukio tai ammattikoulu)	4	1	Eläkkeellä (ml. työkyvyttömyyseläke)	Suomi	2021	Pirkanmaa	Ei	Erikoissairaanhoidossa (esim. sairaalan neurologian poliklinikka)			MS-tauti hoitotasapainossa, arjen toimintakyky alentunut			2	0	2	0	2	2	En ollenkaan	En ollenkaan	Kohtalainen	Kohtalainen	Kyllä, suurinpiirtein	Kyllä, suurinpiirtein	Kyllä	Ei	Kyllä	Ei	Kyllä	Kyllä	Ei	Harvoin	Ei koskaan	En osaa sanoa	Joskus	Joskus	Joskus	Joskus	Harvoin	Harvoin	Harvoin	Ei koskaan	Harvoin	Ei koskaan	Joskus	Ei koskaan
45-54	Mies	Ylempi korkeakoulututkinto	4	2	Täysipäiväinen	Suomi	2000	Länsi-Uusimaa (ja HUS)	Ei	Erikoissairaanhoidossa (esim. sairaalan neurologian poliklinikka)			MS-tauti hoitotasapainossa, arjen toimintakyky alentunut			1	0	2	2	01	1	En ollenkaan	En ollenkaan	Kohtalainen	Kohtalainen	Ei	Kyllä, suurinpiirtein	Kyllä	Ei	Ei	Kyllä	Kyllä	Ei	Ei	Harvoin	Ei koskaan	Ei koskaan	Joskus	Usein	Harvoin	Joskus	Joskus	Joskus	Joskus	Ei koskaan	Harvoin	Harvoin	Joskus	Ei koskaan
45-54	Nainen	Ylempi korkeakoulututkinto	1 (Asun yksin)	0	Täysipäiväinen	Suomi	1993	Helsinki (ja HUS)	Ei	Erikoissairaanhoidossa (esim. sairaalan neurologian poliklinikka)		MS-tauti hoitotasapainossa, ei juuri toimintakykyhaittaa				0	0	1	0	0	1	En ollenkaan	En ollenkaan	Erinomainen	Erinomainen	En osaa sanoa	En osaa sanoa	Kyllä	Kyllä	Ei	Kyllä	Ei	Ei	Ei	Ei koskaan	Ei koskaan	En osaa sanoa	Ei koskaan	Aina	Aina	Aina	Aina	Aina	Aina	Aina	Aina	Aina	Aina	En osaa sanoa
35-44	Mies	Alempi korkeakoulututkinto	2	0	Täysipäiväinen	Suomi	2019	Pirkanmaa	Ei	Erikoissairaanhoidossa (esim. sairaalan neurologian poliklinikka)		MS-tauti hoitotasapainossa, ei juuri toimintakykyhaittaa	MS-tauti hoitotasapainossa, arjen toimintakyky alentunut			1	0	1	2	1	1	En ollenkaan	En ollenkaan	Tyydyttävä	Hyvä	Kyllä, suurinpiirtein	Kyllä, varmasti	Kyllä	Kyllä	Kyllä	Kyllä	Ei	Kyllä	Ei	Ei koskaan	Ei koskaan	En osaa sanoa	Ei koskaan	Ei koskaan	Aina	Usein	Usein	Aina	Usein	Ei koskaan	Usein	Ei koskaan	Usein	Ei koskaan
35-44	Mies	Ylempi korkeakoulututkinto	4	2	Täysipäiväinen	Suomi	2022	Keski-Uusimaa (ja HUS)	En osaa sanoa	Erikoissairaanhoidossa (esim. sairaalan neurologian poliklinikka)			MS-tauti hoitotasapainossa, arjen toimintakyky alentunut			35	0	2	0	3	2	En ollenkaan	En ollenkaan	Tyydyttävä	Hyvä	Ei	Ei	Kyllä	Kyllä	Kyllä	Kyllä	Ei	En osaa sanoa	Ei	Ei koskaan	Ei koskaan	En osaa sanoa	Aina	Usein	Joskus	Usein	Usein	Usein	Aina	Harvoin	Aina	Joskus	Joskus	Usein
65-74	Nainen	Opistoasteen tutkinto	2	0	Eläkkeellä (ml. työkyvyttömyyseläke)	Suomi	1998	Keski-Pohjanmaa	Kyllä	En osaa sanoa			MS-tauti hoitotasapainossa, arjen toimintakyky alentunut			0	1	9	6	0	8	En ollenkaan	En ollenkaan	Kohtalainen	Kohtalainen	Ei	Ei	Kyllä	Ei	Ei	Ei	Kyllä	Kyllä	Ei	Usein	Ei koskaan	Ei koskaan	Usein	Joskus	Ei koskaan	Joskus	Joskus	Harvoin	Joskus	Ei koskaan	Ei koskaan	Harvoin	Harvoin	Ei koskaan
55-64	Nainen	Opistoasteen tutkinto	1 (Asun yksin)	0	Eläkkeellä (ml. työkyvyttömyyseläke)	Suomi	1993	Keski-Suomi	Ei	Erikoissairaanhoidossa (esim. sairaalan neurologian poliklinikka)		MS-tauti hoitotasapainossa, ei juuri toimintakykyhaittaa				1	0	0	0	0	1	En ollenkaan	En ollenkaan	Tyydyttävä	Hyvä	Kyllä, suurinpiirtein	Kyllä, suurinpiirtein	Ei	Kyllä	Kyllä	Kyllä	Ei	Kyllä	Ei	Harvoin	Ei koskaan	Ei koskaan	Usein	Usein	Joskus	Joskus	Aina	Joskus	Joskus	Usein	Joskus	Usein	Joskus	Joskus
35-44	Nainen	Toinen aste (Lukio tai ammattikoulu)	2	0	Täysipäiväinen	Suomi	2004	Keski-Suomi	En osaa sanoa	Perusterveydenhuollossa (esim. terveyskeskus tai - asema)		MS-tauti hoitotasapainossa, ei juuri toimintakykyhaittaa				4	0	7	4	2	3	En ollenkaan	En ollenkaan	Hyvä	Erinomainen	En osaa sanoa	Ei	Kyllä	Kyllä	Kyllä	Kyllä	Ei	Kyllä	Kyllä	Harvoin	En osaa sanoa	Aina	Joskus	Usein	Harvoin	Usein	Usein	Usein	Aina	Harvoin	Aina	Usein	Usein	En osaa sanoa
35-44	Nainen	Ylempi korkeakoulututkinto	3	1	Osa-aikainen	Suomi	2002	Pirkanmaa	Ei	Perusterveydenhuollossa (esim. terveyskeskus tai - asema)			MS-tauti hoitotasapainossa, arjen toimintakyky alentunut			1	0	0	0	1	0	En ollenkaan	En ollenkaan	Tyydyttävä	Tyydyttävä	En osaa sanoa	En osaa sanoa	Kyllä	Ei	Ei	Ei	Kyllä	En osaa sanoa	Ei	Ei koskaan	Ei koskaan	En osaa sanoa	Joskus	Usein	Harvoin	Joskus	Joskus	En osaa sanoa	Usein	Ei koskaan	Ei koskaan	Ei koskaan	Joskus	Harvoin
55-64	Nainen	Ylempi korkeakoulututkinto	3	0	Eläkkeellä (ml. työkyvyttömyyseläke)	Suomi	1986	Länsi-Uusimaa (ja HUS)	Ei	Yksityisellä poliklinikalla (esim. yksityinen neurologi)			MS-tauti hoitotasapainossa, arjen toimintakyky alentunut			3	0	3	0	0	3	En ollenkaan	En ollenkaan	Tyydyttävä	Hyvä	Ei	En osaa sanoa	Kyllä	Ei	Ei	Kyllä	Ei	Kyllä	Ei	Ei koskaan	Ei koskaan	En osaa sanoa	Usein	Joskus	Joskus	Aina	Harvoin	Harvoin	Usein	Harvoin	Joskus	Joskus	Joskus	Harvoin
55-64	Mies	Ylempi korkeakoulututkinto	2	0	Täysipäiväinen	Suomi	1994	Pirkanmaa	Kyllä	Perusterveydenhuollossa (esim. terveyskeskus tai - asema)			MS-tauti hoitotasapainossa, arjen toimintakyky alentunut			1	0	3	0	1	3	En ollenkaan	En ollenkaan	Tyydyttävä	Tyydyttävä	Kyllä, suurinpiirtein	Kyllä, varmasti	Ei	Ei	Ei	En osaa sanoa	Ei	Ei	Ei	Ei koskaan	Ei koskaan	En osaa sanoa	Ei koskaan	Usein	Usein	Usein	Usein	Usein	Aina	Joskus	Joskus	Usein	Usein	Joskus
45-54	Nainen	Alempi korkeakoulututkinto	2	0	Täysipäiväinen	Suomi	2022	Keski-Uusimaa (ja HUS)	Ei	Erikoissairaanhoidossa (esim. sairaalan neurologian poliklinikka)		MS-tauti hoitotasapainossa, ei juuri toimintakykyhaittaa				1	0	3	0	1	2	En ollenkaan	Alle 7 päivää	Hyvä	Hyvä	Kyllä, suurinpiirtein	Kyllä, suurinpiirtein	Kyllä	Ei	Ei	Kyllä	Ei	Ei	Ei	Ei koskaan	Ei koskaan	En osaa sanoa	Ei koskaan	Aina	Joskus	Aina	Aina	Aina	Aina	Ei koskaan	Usein	Harvoin	En osaa sanoa	Ei koskaan
65-74	Mies	Tutkijakoulutus	2	0	Eläkkeellä (ml. työkyvyttömyyseläke)	Suomi	1997	Pirkanmaa	Kyllä	Perusterveydenhuollossa (esim. terveyskeskus tai - asema)		MS-tauti hoitotasapainossa, ei juuri toimintakykyhaittaa				0	0	3	1	0	4	En ollenkaan	En ollenkaan	Hyvä	Hyvä	En osaa sanoa	Kyllä, suurinpiirtein	Ei	Ei	Ei	Kyllä	Ei	Ei	Ei	En osaa sanoa	Ei koskaan	En osaa sanoa	Ei koskaan	En osaa sanoa	En osaa sanoa	En osaa sanoa	En osaa sanoa	En osaa sanoa	En osaa sanoa	En osaa sanoa	En osaa sanoa	En osaa sanoa	En osaa sanoa	En osaa sanoa
35-44	Nainen	Toinen aste (Lukio tai ammattikoulu)	2	0	Täysipäiväinen	Suomi	2006	Etelä-Pohjanmaa	Ei	Erikoissairaanhoidossa (esim. sairaalan neurologian poliklinikka)				MS-tauti ei hoitotasapainossa (esim. pahenemisvaihe)		10	0	2	0	4	2	Alle 7 päivää	En ollenkaan	Tyydyttävä	Hyvä	Kyllä, suurinpiirtein	Kyllä, varmasti	Kyllä	Kyllä	Kyllä	Kyllä	Ei	Kyllä	Kyllä	Joskus	Ei koskaan	En osaa sanoa	Harvoin	Usein	Joskus	Usein	Usein	Usein	Usein	Ei koskaan	Harvoin	Harvoin	Usein	Joskus
35-44	Nainen	Toinen aste (Lukio tai ammattikoulu)	2	0	Eläkkeellä (ml. työkyvyttömyyseläke)	Suomi	2004	Länsi-Uusimaa (ja HUS)	Ei	Erikoissairaanhoidossa (esim. sairaalan neurologian poliklinikka)			MS-tauti hoitotasapainossa, arjen toimintakyky alentunut	MS-tauti ei hoitotasapainossa (esim. pahenemisvaihe)		1	2	0	2	2	0	En ollenkaan	En ollenkaan	Tyydyttävä	Hyvä	Ei	Kyllä, suurinpiirtein	Kyllä	Ei	Kyllä	Kyllä	Ei	En osaa sanoa	Ei	Ei koskaan	Ei koskaan	En osaa sanoa	Usein	Joskus	Harvoin	Usein	Usein	Usein	Usein	Harvoin	Joskus	Joskus	Joskus	Ei koskaan
45-54	Nainen	Toinen aste (Lukio tai ammattikoulu)	5 tai enemmän	0	Eläkkeellä (ml. työkyvyttömyyseläke)	Suomi	1998	Etelä-Pohjanmaa	Ei	Erikoissairaanhoidossa (esim. sairaalan neurologian poliklinikka)			MS-tauti hoitotasapainossa, arjen toimintakyky alentunut			1	2	2	4	5	1	Alle 7 päivää	En ollenkaan	Kohtalainen	Erinomainen	Kyllä, varmasti	Kyllä, varmasti	Kyllä	Ei	Kyllä	Kyllä	Ei	Kyllä	Kyllä	Joskus	Ei koskaan	En osaa sanoa	Joskus	Aina	Usein	Aina	Aina	Aina	Aina	Joskus	Aina	Usein	Usein	Usein
55-64	Mies	Peruskoulu	1 (Asun yksin)	0	Eläkkeellä (ml. työkyvyttömyyseläke)	Suomi	2019	Kainuu	Kyllä	Erikoissairaanhoidossa (esim. sairaalan neurologian poliklinikka)		MS-tauti hoitotasapainossa, ei juuri toimintakykyhaittaa				1	2	3	2	2	5	En ollenkaan	En ollenkaan	Kohtalainen	Hyvä	Kyllä, suurinpiirtein	Kyllä, suurinpiirtein	Kyllä	Kyllä	Kyllä	Kyllä	Ei	Ei	Kyllä	Harvoin	Ei koskaan	En osaa sanoa	Joskus	Usein	Joskus	Usein	Usein	Usein	Usein	Joskus	Usein	Usein	Aina	Usein
55-64	Nainen	Toinen aste (Lukio tai ammattikoulu)	1 (Asun yksin)	0	Muu	Suomi	2016	Kanta-Häme	Kyllä	Erikoissairaanhoidossa (esim. sairaalan neurologian poliklinikka)		MS-tauti hoitotasapainossa, ei juuri toimintakykyhaittaa				0	0	3	0	0	3	En ollenkaan	En ollenkaan	Hyvä	Erinomainen	Kyllä, suurinpiirtein	Kyllä, suurinpiirtein	Kyllä	Kyllä	Kyllä	Kyllä	Ei	Ei	Ei	Ei koskaan	Ei koskaan	Ei koskaan	Joskus	Aina	Harvoin	Aina	Aina	Aina	Aina	Ei koskaan	Aina	En osaa sanoa	Aina	En osaa sanoa
45-54	Nainen	Toinen aste (Lukio tai ammattikoulu)	5 tai enemmän	2	Eläkkeellä (ml. työkyvyttömyyseläke)	Suomi	2015	Pohjanmaa	Ei	Erikoissairaanhoidossa (esim. sairaalan neurologian poliklinikka)		MS-tauti hoitotasapainossa, ei juuri toimintakykyhaittaa				57	4	2	1	10	4	En ollenkaan	Yli 7 päivää	Hyvä	Erinomainen	Kyllä, varmasti	Kyllä, varmasti	Kyllä	Kyllä	Kyllä	Kyllä	Ei	Ei	Kyllä	Harvoin	Ei koskaan	En osaa sanoa	Harvoin	Aina	Joskus	Usein	Aina	Aina	Aina	Joskus	Usein	Usein	Usein	Joskus
65-74	Mies	Peruskoulu	1 (Asun yksin)	0	Eläkkeellä (ml. työkyvyttömyyseläke)	Suomi	2003	Pohjois-Karjala	Kyllä	Perusterveydenhuollossa (esim. terveyskeskus tai - asema)		MS-tauti hoitotasapainossa, ei juuri toimintakykyhaittaa	MS-tauti hoitotasapainossa, arjen toimintakyky alentunut			0	0	5	0	0	4	En ollenkaan	En ollenkaan	Kohtalainen	Huono	Ei	Kyllä, suurinpiirtein	Ei	Kyllä	Ei	Kyllä	Ei	Kyllä	Ei	Aina	Ei koskaan	Aina	Aina	Joskus	Harvoin	Harvoin	Harvoin	Aina	Aina	Joskus	Harvoin	Harvoin	Aina	Harvoin
35-44	Nainen	Opistoasteen tutkinto	3	1	Opiskelija	Suomi	2006	Pohjois-Savo	Ei	Erikoissairaanhoidossa (esim. sairaalan neurologian poliklinikka)		MS-tauti hoitotasapainossa, ei juuri toimintakykyhaittaa				2	1	2	0	2	2	En ollenkaan	En ollenkaan	Tyydyttävä	Tyydyttävä	Ei	Ei	Ei	Ei	Kyllä	Kyllä	Kyllä	Kyllä	Ei	Ei koskaan	Ei koskaan	En osaa sanoa	Aina	Harvoin	Usein	Usein	Usein	Joskus	Usein	Ei koskaan	Harvoin	Ei koskaan	Joskus	Ei koskaan
55-64	Nainen	Tutkijakoulutus	2	0	Täysipäiväinen	Suomi	2013	Pirkanmaa	Kyllä	Erikoissairaanhoidossa (esim. sairaalan neurologian poliklinikka)		MS-tauti hoitotasapainossa, ei juuri toimintakykyhaittaa				1	1	7	2	1	5	En ollenkaan	En ollenkaan	Tyydyttävä	Erinomainen	Kyllä, suurinpiirtein	Kyllä, suurinpiirtein	Kyllä	Kyllä	Kyllä	Kyllä	Ei	Ei	Kyllä	Ei koskaan	Ei koskaan	En osaa sanoa	Ei koskaan	Aina	Usein	Aina	Aina	Aina	Aina	Usein	Aina	Aina	Aina	En osaa sanoa
45-54	Nainen	Ylempi korkeakoulututkinto	4	2	Täysipäiväinen	Suomi	1989	Kymenlaakso	Ei	Erikoissairaanhoidossa (esim. sairaalan neurologian poliklinikka)			MS-tauti hoitotasapainossa, arjen toimintakyky alentunut			1	0	10	3	2	5	En ollenkaan	En ollenkaan	Tyydyttävä	Hyvä	Ei	Kyllä, suurinpiirtein	Ei	Kyllä	Kyllä	Kyllä	En osaa sanoa	Ei	Ei	Harvoin	Ei koskaan	En osaa sanoa	Joskus	Usein	Aina	Aina	Aina	Aina	Aina	Usein	Aina	Joskus	Joskus	Ei koskaan
45-54	Nainen	Toinen aste (Lukio tai ammattikoulu)	2	0	Eläkkeellä (ml. työkyvyttömyyseläke)	Suomi	2018	Kanta-Häme	Kyllä	Erikoissairaanhoidossa (esim. sairaalan neurologian poliklinikka)			MS-tauti hoitotasapainossa, arjen toimintakyky alentunut			1	0	5	1	1	3	En ollenkaan	En ollenkaan	Tyydyttävä	Hyvä	Kyllä, suurinpiirtein	Kyllä, suurinpiirtein	Kyllä	Kyllä	Kyllä	Kyllä	Ei	Ei	Ei	Harvoin	Ei koskaan	En osaa sanoa	Joskus	Usein	Aina	Usein	Usein	Usein	Aina	Harvoin	Usein	Usein	Usein	Harvoin
25-34	Nainen	Ylempi korkeakoulututkinto	3	1	Täysipäiväinen	Ruotsi	2023	Helsinki (ja HUS)	Kyllä	Erikoissairaanhoidossa (esim. sairaalan neurologian poliklinikka)	Uusi MS-tauti diagnoosi		MS-tauti hoitotasapainossa, arjen toimintakyky alentunut			4	0	8	0	4	2	En ollenkaan	En ollenkaan	Tyydyttävä	Hyvä	Ei	Ei	Kyllä	Ei	Kyllä	Kyllä	Kyllä	Kyllä	Ei	Ei koskaan	Ei koskaan	En osaa sanoa	Usein	Joskus	Joskus	Usein	Joskus	Joskus	Usein	Ei koskaan	Joskus	Ei koskaan	En osaa sanoa	Ei koskaan
55-64	Nainen	Alempi korkeakoulututkinto	2	0	Eläkkeellä (ml. työkyvyttömyyseläke)	Suomi	1999	Helsinki (ja HUS)	Ei	Erikoissairaanhoidossa (esim. sairaalan neurologian poliklinikka)				MS-tauti ei hoitotasapainossa (esim. pahenemisvaihe)		49	2	1	2	3	2	En ollenkaan	Yli 7 päivää	Tyydyttävä	Erinomainen	Kyllä, suurinpiirtein	Kyllä, suurinpiirtein	Kyllä	Kyllä	Kyllä	Kyllä	Ei	Kyllä	Kyllä	Harvoin	Ei koskaan	En osaa sanoa	Harvoin	Aina	Aina	Aina	Aina	Aina	Aina	Harvoin	Aina	Aina	Aina	Usein
35-44	Nainen	Alempi korkeakoulututkinto	4	2	Osa-aikainen	Suomi	2008	Etelä-Karjala	Kyllä	Erikoissairaanhoidossa (esim. sairaalan neurologian poliklinikka)		MS-tauti hoitotasapainossa, ei juuri toimintakykyhaittaa	MS-tauti hoitotasapainossa, arjen toimintakyky alentunut			1	0	2	1	3	2	En ollenkaan	En ollenkaan	Tyydyttävä	Hyvä	Ei	En osaa sanoa	En osaa sanoa	Ei	Kyllä	Kyllä	Ei	Kyllä	Ei	Harvoin	Ei koskaan	En osaa sanoa	Joskus	Usein	Joskus	Usein	Aina	Usein	Usein	Harvoin	Joskus	Usein	Usein	Joskus
75 tai vanhempi	Mies	Toinen aste (Lukio tai ammattikoulu)	2	0	Eläkkeellä (ml. työkyvyttömyyseläke)	Suomi	20005	Etelä-Pohjanmaa	Kyllä	En osaa sanoa			MS-tauti hoitotasapainossa, arjen toimintakyky alentunut			10	0	10	0	1	1	En ollenkaan	En ollenkaan	Tyydyttävä	Tyydyttävä	En osaa sanoa	En osaa sanoa	Ei	Ei	Ei	Ei	Kyllä	En osaa sanoa	Ei	Ei koskaan	Ei koskaan	En osaa sanoa	Usein	Joskus	Usein	Usein	Usein	Joskus	Joskus	Joskus	Joskus	Joskus	Ei koskaan	Ei koskaan
55-64	Nainen	Alempi korkeakoulututkinto	2	0	Eläkkeellä (ml. työkyvyttömyyseläke)	Suomi	2015	Pohjois-Savo	Ei	Perusterveydenhuollossa (esim. terveyskeskus tai - asema)			MS-tauti hoitotasapainossa, arjen toimintakyky alentunut			1	0	0	0	2	2	En ollenkaan	En ollenkaan	Tyydyttävä	Kohtalainen	En osaa sanoa	Kyllä, suurinpiirtein	Kyllä	Kyllä	Kyllä	Kyllä	Ei	Ei	Ei	Ei koskaan	Ei koskaan	En osaa sanoa	Usein	Usein	Joskus	Usein	Usein	Usein	Usein	Joskus	Usein	Usein	Usein	Joskus
55-64	Nainen	Opistoasteen tutkinto	1 (Asun yksin)	0	Osa-aikainen	Suomi	1995	Helsinki (ja HUS)	Kyllä	Erikoissairaanhoidossa (esim. sairaalan neurologian poliklinikka)		MS-tauti hoitotasapainossa, ei juuri toimintakykyhaittaa				4	0	3	0	4	2	En ollenkaan	En ollenkaan	Hyvä	Erinomainen	Kyllä, suurinpiirtein	Kyllä, varmasti	Kyllä	Kyllä	Ei	Kyllä	Ei	Ei	Ei	Ei koskaan	Ei koskaan	Aina	Joskus	Aina	Usein	Aina	Aina	Aina	Aina	Usein	Aina	Aina	Aina	Harvoin
55-64	Mies	Toinen aste (Lukio tai ammattikoulu)	2	0	Eläkkeellä (ml. työkyvyttömyyseläke)	Suomi	2013	Pohjois-Savo	Ei	Erikoissairaanhoidossa (esim. sairaalan neurologian poliklinikka)		MS-tauti hoitotasapainossa, ei juuri toimintakykyhaittaa				1	1	0	0	2	0	En ollenkaan	En ollenkaan	Tyydyttävä	Erinomainen	Kyllä, suurinpiirtein	Kyllä, suurinpiirtein	Kyllä	Ei	Kyllä	Kyllä	Ei	Kyllä	Kyllä	Harvoin	Ei koskaan	Ei koskaan	Joskus	Aina	Usein	Usein	Usein	Usein	Joskus	Ei koskaan	Usein	Usein	Usein	Joskus
45-54	Nainen	Toinen aste (Lukio tai ammattikoulu)	2	0	Osa-aikainen	Suomi	2016	Kanta-Häme	Kyllä	Erikoissairaanhoidossa (esim. sairaalan neurologian poliklinikka)		MS-tauti hoitotasapainossa, ei juuri toimintakykyhaittaa				1	0	4	0	2	10	En ollenkaan	En ollenkaan	Hyvä	Hyvä	Ei	Ei	Kyllä	Kyllä	Kyllä	Kyllä	Kyllä	Kyllä	Ei	Ei koskaan	En osaa sanoa	En osaa sanoa	Harvoin	Aina	Usein	Aina	Aina	Aina	Usein	Joskus	Aina	Joskus	Aina	Ei koskaan
55-64	Nainen	Ylempi korkeakoulututkinto	1 (Asun yksin)	0	Osa-aikainen	Suomi	2002	Varsinais-Suomi	Kyllä	Erikoissairaanhoidossa (esim. sairaalan neurologian poliklinikka)			MS-tauti hoitotasapainossa, arjen toimintakyky alentunut			2	0	10	0	0	2	En ollenkaan	En ollenkaan	Tyydyttävä	Hyvä	En osaa sanoa	Kyllä, suurinpiirtein	Kyllä	Kyllä	Ei	Kyllä	Ei	Kyllä	Kyllä	Ei koskaan	Ei koskaan	En osaa sanoa	En osaa sanoa	Aina	Aina	Usein	Aina	Aina	Aina	Joskus	Usein	Usein	Usein	Ei koskaan
55-64	Nainen	Toinen aste (Lukio tai ammattikoulu)	2	0	Eläkkeellä (ml. työkyvyttömyyseläke)	Suomi	1988	Satakunta	Ei	Perusterveydenhuollossa (esim. terveyskeskus tai - asema)			MS-tauti hoitotasapainossa, arjen toimintakyky alentunut	MS-tauti ei hoitotasapainossa (esim. pahenemisvaihe)		0	0	0	0	0	0	En ollenkaan	En ollenkaan	Kohtalainen	Tyydyttävä	En osaa sanoa	Kyllä, suurinpiirtein	Ei	Ei	Ei	Ei	Ei	Kyllä	Ei	Ei koskaan	Ei koskaan	Ei koskaan	Aina	Usein	Ei koskaan	Joskus	Joskus	Joskus	Harvoin	Harvoin	Joskus	Joskus	Joskus	Ei koskaan
55-64	Mies	Opistoasteen tutkinto	2	0	Eläkkeellä (ml. työkyvyttömyyseläke)	Suomi	2022	Pirkanmaa	Ei	Perusterveydenhuollossa (esim. terveyskeskus tai - asema)			MS-tauti hoitotasapainossa, arjen toimintakyky alentunut			2	1	0	1	3	1	En ollenkaan	En ollenkaan	Tyydyttävä	Erinomainen	Kyllä, varmasti	Kyllä, suurinpiirtein	Kyllä	Kyllä	En osaa sanoa	Kyllä	Ei	Ei	Kyllä	Ei koskaan	Ei koskaan	En osaa sanoa	Harvoin	Usein	Usein	Usein	Aina	Aina	Aina	Usein	Aina	Usein	Usein	Aina
45-54	Nainen	Alempi korkeakoulututkinto	2	0	Eläkkeellä (ml. työkyvyttömyyseläke)	Suomi	2000	Itä-Uusimaa (ja HUS)	Kyllä	Erikoissairaanhoidossa (esim. sairaalan neurologian poliklinikka)			MS-tauti hoitotasapainossa, arjen toimintakyky alentunut			1	0	30	0	2	4	En ollenkaan	En ollenkaan	Huono	Tyydyttävä	Ei	Kyllä, suurinpiirtein	Ei	Ei	Ei	Kyllä	Kyllä	Kyllä	Ei	Usein	En osaa sanoa	En osaa sanoa	Aina	Ei koskaan	Ei koskaan	Ei koskaan	Ei koskaan	Ei koskaan	Harvoin	Ei koskaan	Ei koskaan	Ei koskaan	Ei koskaan	Ei koskaan
65-74	Mies	Peruskoulu	1 (Asun yksin)	0	Eläkkeellä (ml. työkyvyttömyyseläke)	Suomi	1990	Itä-Uusimaa (ja HUS)	Ei	Perusterveydenhuollossa (esim. terveyskeskus tai - asema)			MS-tauti hoitotasapainossa, arjen toimintakyky alentunut			0	0	0	0	2	0	En ollenkaan	En ollenkaan	Kohtalainen	Kohtalainen	En osaa sanoa	Ei	Ei	Ei	Ei	Kyllä	Ei	Ei	Ei	Harvoin	Ei koskaan	En osaa sanoa	Ei koskaan	Harvoin	Harvoin	En osaa sanoa	En osaa sanoa	En osaa sanoa	En osaa sanoa	Harvoin	Joskus	Harvoin	Harvoin	Ei koskaan
55-64	Nainen	Ylempi korkeakoulututkinto	2	0	Eläkkeellä (ml. työkyvyttömyyseläke)	Suomi	2001	Keski-Suomi	Kyllä	Perusterveydenhuollossa (esim. terveyskeskus tai - asema)			MS-tauti hoitotasapainossa, arjen toimintakyky alentunut			75	0	6	20	2	6	En ollenkaan	Yli 7 päivää	Kohtalainen	Tyydyttävä	En osaa sanoa	Kyllä, suurinpiirtein	Kyllä	Kyllä	Ei	Ei	Ei	Kyllä	Kyllä	En osaa sanoa	Ei koskaan	En osaa sanoa	Joskus	Usein	Joskus	Usein	Usein	Usein	Joskus	Harvoin	Joskus	En osaa sanoa	En osaa sanoa	Joskus
45-54	Nainen	Toinen aste (Lukio tai ammattikoulu)	2	0	Eläkkeellä (ml. työkyvyttömyyseläke)	Suomi	2003	Varsinais-Suomi	Kyllä	Erikoissairaanhoidossa (esim. sairaalan neurologian poliklinikka)			MS-tauti hoitotasapainossa, arjen toimintakyky alentunut			40	0	20	0	10	20	En ollenkaan	Yli 7 päivää	Kohtalainen	Tyydyttävä	Ei	Kyllä, suurinpiirtein	Kyllä	Ei	Kyllä	Kyllä	Kyllä	Kyllä	Ei	Harvoin	Ei koskaan	Ei koskaan	Aina	Joskus	Ei koskaan	Harvoin	Harvoin	Joskus	Harvoin	Ei koskaan	Joskus	Usein	Harvoin	Ei koskaan
65-74	Nainen	Peruskoulu	2	0	Eläkkeellä (ml. työkyvyttömyyseläke)	Suomi	1997	Pohjois-Pohjanmaa	Kyllä	En osaa sanoa			MS-tauti hoitotasapainossa, arjen toimintakyky alentunut			1	0	2	0	2,fysioterapeuttia	1	En ollenkaan	En ollenkaan	Kohtalainen	Huono	Ei	En osaa sanoa	Ei	Ei	Ei	Ei	Kyllä	Kyllä	Ei	Ei koskaan	Ei koskaan	Ei koskaan	Usein	Harvoin	Ei koskaan	Harvoin	Joskus	Harvoin	Joskus	Ei koskaan	Harvoin	Harvoin	En osaa sanoa	Ei koskaan
45-54	Nainen	Opistoasteen tutkinto	2	0	Täysipäiväinen	Suomi	2001	Satakunta	Ei	Yksityisellä poliklinikalla (esim. yksityinen neurologi)		MS-tauti hoitotasapainossa, ei juuri toimintakykyhaittaa				1	0	4	2	0	1	En ollenkaan	En ollenkaan	Hyvä	Erinomainen	Kyllä, suurinpiirtein	Kyllä, suurinpiirtein	Ei	Ei	Ei	Kyllä	Ei	Ei	Kyllä	En osaa sanoa	En osaa sanoa	En osaa sanoa	Harvoin	Usein	Usein	Usein	Aina	Aina	Aina	Usein	Usein	Usein	Usein	Joskus
45-54	Nainen	Ylempi korkeakoulututkinto	3	1	Eläkkeellä (ml. työkyvyttömyyseläke)	Suomi	2000	Päijät-Häme	Kyllä	Erikoissairaanhoidossa (esim. sairaalan neurologian poliklinikka)			MS-tauti hoitotasapainossa, arjen toimintakyky alentunut			4	2	9	6	4	4	En ollenkaan	En ollenkaan	Kohtalainen	Hyvä	Kyllä, suurinpiirtein	Kyllä, varmasti	Kyllä	Ei	Kyllä	Kyllä	Kyllä	Kyllä	Kyllä	Harvoin	Ei koskaan	En osaa sanoa	Usein	Aina	Joskus	Usein	Usein	Usein	Usein	Joskus	Joskus	Joskus	Usein	Ei koskaan
55-64	Nainen	Opistoasteen tutkinto	1 (Asun yksin)	0	Eläkkeellä (ml. työkyvyttömyyseläke)	Suomi	2011	Etelä-Savo	Kyllä	Erikoissairaanhoidossa (esim. sairaalan neurologian poliklinikka)			MS-tauti hoitotasapainossa, arjen toimintakyky alentunut			0	1	5	2	1	4	En ollenkaan	En ollenkaan	Hyvä	Hyvä	En osaa sanoa	Kyllä, suurinpiirtein	Kyllä	Kyllä	Kyllä	Kyllä	Ei	En osaa sanoa	Ei	Harvoin	Ei koskaan	En osaa sanoa	Usein	Joskus	Joskus	Usein	Usein	Usein	Usein	En osaa sanoa	Usein	Usein	Usein	Ei koskaan
55-64	Nainen	Alempi korkeakoulututkinto	3	1	Eläkkeellä (ml. työkyvyttömyyseläke)	Suomi	2006	Pohjois-Savo	Ei	Erikoissairaanhoidossa (esim. sairaalan neurologian poliklinikka)			MS-tauti hoitotasapainossa, arjen toimintakyky alentunut			1	0	2	0	fys kuntoutus 50, lääk 1	2	En ollenkaan	Yli 7 päivää	Kohtalainen	Hyvä	En osaa sanoa	En osaa sanoa	Kyllä	Ei	Ei	En osaa sanoa	Kyllä	Kyllä	Ei	Ei koskaan	Ei koskaan	En osaa sanoa	Usein	Usein	Ei koskaan	Usein	Aina	Aina	Aina	Ei koskaan	Joskus	Harvoin	Usein	Ei koskaan
65-74	Nainen	Ylempi korkeakoulututkinto	2	0	Eläkkeellä (ml. työkyvyttömyyseläke)	Suomi	2001	Pirkanmaa	Ei	En osaa sanoa		MS-tauti hoitotasapainossa, ei juuri toimintakykyhaittaa				0	0	0	0	0	0	En ollenkaan	En ollenkaan	Hyvä	Hyvä	En osaa sanoa	Kyllä, suurinpiirtein	Kyllä	En osaa sanoa	Ei	En osaa sanoa	Ei	Ei	Ei	En osaa sanoa	En osaa sanoa	En osaa sanoa	En osaa sanoa	En osaa sanoa	En osaa sanoa	En osaa sanoa	En osaa sanoa	En osaa sanoa	En osaa sanoa	En osaa sanoa	En osaa sanoa	En osaa sanoa	En osaa sanoa	En osaa sanoa
55-64	Nainen	Toinen aste (Lukio tai ammattikoulu)	1 (Asun yksin)	0	Työtön	Suomi	1995	Pohjois-Pohjanmaa	Ei	Erikoissairaanhoidossa (esim. sairaalan neurologian poliklinikka)			MS-tauti hoitotasapainossa, arjen toimintakyky alentunut			1	0	3	2	2	2	En ollenkaan	En ollenkaan	Tyydyttävä	Kohtalainen	Kyllä, suurinpiirtein	Kyllä, suurinpiirtein	En osaa sanoa	En osaa sanoa	Kyllä	En osaa sanoa	Kyllä	Kyllä	En osaa sanoa	Joskus	En osaa sanoa	En osaa sanoa	Joskus	Usein	Harvoin	Harvoin	Joskus	Joskus	Joskus	Harvoin	Harvoin	Harvoin	Usein	Ei koskaan
55-64	Mies	Ylempi korkeakoulututkinto	2	0	Osa-aikainen	Suomi	2014	Varsinais-Suomi	Kyllä	Erikoissairaanhoidossa (esim. sairaalan neurologian poliklinikka)			MS-tauti hoitotasapainossa, arjen toimintakyky alentunut			2	3	3	0	8	4	En ollenkaan	En ollenkaan	Kohtalainen	Erinomainen	Kyllä, suurinpiirtein	Kyllä, suurinpiirtein	Kyllä	Kyllä	Kyllä	Kyllä	Ei	En osaa sanoa	Kyllä	Ei koskaan	Ei koskaan	Harvoin	Joskus	Usein	Aina	Aina	Aina	Aina	Aina	Usein	Aina	Aina	Aina	Aina
55-64	Nainen	Peruskoulu	1 (Asun yksin)	0	Eläkkeellä (ml. työkyvyttömyyseläke)	Suomi	1983	Pirkanmaa	Ei	En osaa sanoa		MS-tauti hoitotasapainossa, ei juuri toimintakykyhaittaa				45	2	2	2	2	0	En ollenkaan	En ollenkaan	Hyvä	Erinomainen	Kyllä, suurinpiirtein	Kyllä, varmasti	Kyllä	Ei	Ei	En osaa sanoa	Ei	Kyllä	Kyllä	Harvoin	Ei koskaan	En osaa sanoa	Joskus	Usein	Usein	Usein	Aina	Aina	Joskus	Ei koskaan	Joskus	Usein	Aina	Usein
55-64	Mies	Toinen aste (Lukio tai ammattikoulu)	1 (Asun yksin)	0	Eläkkeellä (ml. työkyvyttömyyseläke)	Suomi	2018	Itä-Uusimaa (ja HUS)	Ei	Erikoissairaanhoidossa (esim. sairaalan neurologian poliklinikka)		MS-tauti hoitotasapainossa, ei juuri toimintakykyhaittaa				50	0	0	0	5	0	En ollenkaan	En ollenkaan	Tyydyttävä	Tyydyttävä	Kyllä, suurinpiirtein	Kyllä, suurinpiirtein	Ei	Ei	Ei	Kyllä	Ei	Ei	Ei	Ei koskaan	Ei koskaan	En osaa sanoa	Ei koskaan	Aina	Ei koskaan	Aina	Aina	Aina	Aina	Ei koskaan	Aina	Ei koskaan	En osaa sanoa	Joskus
55-64	Nainen	Toinen aste (Lukio tai ammattikoulu)	2	0	Eläkkeellä (ml. työkyvyttömyyseläke)	Suomi	2017	Pohjois-Savo	Ei	Erikoissairaanhoidossa (esim. sairaalan neurologian poliklinikka)			MS-tauti hoitotasapainossa, arjen toimintakyky alentunut			1	2	2	0	2	2	En ollenkaan	En ollenkaan	Kohtalainen	Hyvä	Kyllä, suurinpiirtein	Kyllä, varmasti	Kyllä	Kyllä	Kyllä	Kyllä	Ei	Ei	Kyllä	Ei koskaan	Ei koskaan	En osaa sanoa	Harvoin	Usein	Aina	Usein	Aina	Aina	Aina	Joskus	Aina	Aina	Aina	Aina
35-44	Nainen	Toinen aste (Lukio tai ammattikoulu)	1 (Asun yksin)	0	Eläkkeellä (ml. työkyvyttömyyseläke)	Suomi	2011	Pohjois-Pohjanmaa	Kyllä	Erikoissairaanhoidossa (esim. sairaalan neurologian poliklinikka)				MS-tauti ei hoitotasapainossa (esim. pahenemisvaihe)		34	0	4	0	4	12	En ollenkaan	En ollenkaan	Tyydyttävä	Tyydyttävä	Ei	Ei	Ei	Ei	Ei	Ei	Kyllä	Kyllä	Ei	En osaa sanoa	En osaa sanoa	En osaa sanoa	Aina	Joskus	Joskus	Joskus	Joskus	Joskus	Harvoin	Harvoin	Joskus	Harvoin	Joskus	Harvoin
55-64	Nainen	Toinen aste (Lukio tai ammattikoulu)	1 (Asun yksin)	0	Eläkkeellä (ml. työkyvyttömyyseläke)	Suomi	1997	Kainuu	Kyllä	Perusterveydenhuollossa (esim. terveyskeskus tai - asema)				MS-tauti ei hoitotasapainossa (esim. pahenemisvaihe)		40	0	40	0	2	3	En ollenkaan	En ollenkaan	Kohtalainen	Huono	Kyllä, suurinpiirtein	Kyllä, suurinpiirtein	En osaa sanoa	En osaa sanoa	Ei	Ei	En osaa sanoa	Kyllä	Ei	En osaa sanoa	En osaa sanoa	En osaa sanoa	En osaa sanoa	En osaa sanoa	En osaa sanoa	En osaa sanoa	En osaa sanoa	En osaa sanoa	En osaa sanoa	En osaa sanoa	En osaa sanoa	En osaa sanoa	Ei koskaan	Ei koskaan
45-54	Nainen	Opistoasteen tutkinto	2	0	Eläkkeellä (ml. työkyvyttömyyseläke)	Suomi	2009	Kanta-Häme	Ei	Erikoissairaanhoidossa (esim. sairaalan neurologian poliklinikka)			MS-tauti hoitotasapainossa, arjen toimintakyky alentunut			6	13	1	1	2	1	En ollenkaan	Yli 7 päivää	Tyydyttävä	Hyvä	Kyllä, suurinpiirtein	Kyllä, suurinpiirtein	Kyllä	Ei	Kyllä	Kyllä	Ei	Kyllä	Kyllä	Ei koskaan	Ei koskaan	En osaa sanoa	Usein	Harvoin	Joskus	Joskus	Harvoin	Harvoin	Joskus	Ei koskaan	Joskus	Ei koskaan	Joskus	Ei koskaan
35-44	Mies	Toinen aste (Lukio tai ammattikoulu)	1 (Asun yksin)	0	Eläkkeellä (ml. työkyvyttömyyseläke)	Suomi	2022	Pirkanmaa	Ei	Erikoissairaanhoidossa (esim. sairaalan neurologian poliklinikka)			MS-tauti hoitotasapainossa, arjen toimintakyky alentunut			1	1	0	0	35	0	En ollenkaan	Yli 7 päivää	Kohtalainen	Hyvä	Kyllä, varmasti	Kyllä, varmasti	Kyllä	Kyllä	Kyllä	Kyllä	Ei	En osaa sanoa	Kyllä	Ei koskaan	Ei koskaan	En osaa sanoa	Harvoin	Usein	Joskus	Usein	Usein	Usein	Aina	Harvoin	Usein	Usein	Joskus	Ei koskaan
65-74	Mies	Toinen aste (Lukio tai ammattikoulu)	1 (Asun yksin)	0	Eläkkeellä (ml. työkyvyttömyyseläke)	Suomi	1982	Keski-Suomi	Ei	Perusterveydenhuollossa (esim. terveyskeskus tai - asema)			MS-tauti hoitotasapainossa, arjen toimintakyky alentunut			25	2	3	1	3	4	En ollenkaan	Yli 7 päivää	Kohtalainen	Hyvä	Kyllä, suurinpiirtein	Kyllä, varmasti	Kyllä	Kyllä	Kyllä	Kyllä	Ei	Kyllä	Kyllä	En osaa sanoa	En osaa sanoa	En osaa sanoa	En osaa sanoa	En osaa sanoa	En osaa sanoa	En osaa sanoa	En osaa sanoa	En osaa sanoa	En osaa sanoa	En osaa sanoa	En osaa sanoa	En osaa sanoa	En osaa sanoa	En osaa sanoa
45-54	Nainen	Ylempi korkeakoulututkinto	2	1	Täysipäiväinen	Suomi	2001	Pohjois-Pohjanmaa	Ei	Erikoissairaanhoidossa (esim. sairaalan neurologian poliklinikka)		MS-tauti hoitotasapainossa, ei juuri toimintakykyhaittaa				0	0	3	0	0	3	En ollenkaan	En ollenkaan	Hyvä	Tyydyttävä	Kyllä, suurinpiirtein	Kyllä, suurinpiirtein	Ei	Ei	Ei	Kyllä	Ei	Ei	Ei	En osaa sanoa	En osaa sanoa	En osaa sanoa	En osaa sanoa	Harvoin	Harvoin	Aina	Aina	Joskus	Usein	Joskus	Harvoin	Harvoin	Harvoin	Harvoin
55-64	Nainen	Ylempi korkeakoulututkinto	1 (Asun yksin)	0	Eläkkeellä (ml. työkyvyttömyyseläke)	Suomi	2017	Etelä-Savo	Ei	Erikoissairaanhoidossa (esim. sairaalan neurologian poliklinikka)		MS-tauti hoitotasapainossa, ei juuri toimintakykyhaittaa				1	1	0	2	1	2	En ollenkaan	En ollenkaan	Erinomainen	Hyvä	En osaa sanoa	En osaa sanoa	Kyllä	Kyllä	Kyllä	Kyllä	Ei	Ei	Ei	Ei koskaan	Ei koskaan	En osaa sanoa	Harvoin	Usein	Ei koskaan	Usein	Usein	Usein	Usein	Ei koskaan	En osaa sanoa	Ei koskaan	En osaa sanoa	En osaa sanoa
55-64	Mies	Opistoasteen tutkinto	1 (Asun yksin)	0	Eläkkeellä (ml. työkyvyttömyyseläke)	Suomi	1993	Varsinais-Suomi	Kyllä	Erikoissairaanhoidossa (esim. sairaalan neurologian poliklinikka)			MS-tauti hoitotasapainossa, arjen toimintakyky alentunut			31	0	1	0	2	1	En ollenkaan	Yli 7 päivää	Tyydyttävä	Hyvä	En osaa sanoa	En osaa sanoa	Kyllä	Kyllä	Kyllä	Kyllä	Ei	Ei	Ei	Ei koskaan	Harvoin	Harvoin	Joskus	Usein	Ei koskaan	Usein	Aina	Aina	Aina	Joskus	Usein	Usein	Aina	Aina
45-54	Mies	Toinen aste (Lukio tai ammattikoulu)	5 tai enemmän	3	Täysipäiväinen	Suomi	2020	Keski-Uusimaa (ja HUS)	Ei	Erikoissairaanhoidossa (esim. sairaalan neurologian poliklinikka)			MS-tauti hoitotasapainossa, arjen toimintakyky alentunut			10	5	5	5	5	5	Alle 7 päivää	En ollenkaan	Tyydyttävä	Kohtalainen	En osaa sanoa	Kyllä, suurinpiirtein	Kyllä	Kyllä	Ei	Kyllä	Ei	En osaa sanoa	Ei	Ei koskaan	Ei koskaan	Ei koskaan	Harvoin	Joskus	En osaa sanoa	Joskus	En osaa sanoa	Usein	Aina	En osaa sanoa	Joskus	Joskus	Joskus	Joskus
45-54	Nainen	Toinen aste (Lukio tai ammattikoulu)	2	0	Eläkkeellä (ml. työkyvyttömyyseläke)	Suomi	1999	Helsinki (ja HUS)	Kyllä	Erikoissairaanhoidossa (esim. sairaalan neurologian poliklinikka)			MS-tauti hoitotasapainossa, arjen toimintakyky alentunut			1	2	3	1	3	4	En ollenkaan	En ollenkaan	Kohtalainen	Tyydyttävä	Ei	Kyllä, suurinpiirtein	Kyllä	Ei	Ei	Ei	Ei	Kyllä	Ei	Ei koskaan	Ei koskaan	En osaa sanoa	Usein	Harvoin	Usein	Aina	Usein	Usein	Aina	Ei koskaan	Harvoin	Harvoin	Joskus	Ei koskaan
65-74	Nainen	Alempi korkeakoulututkinto	2	0	Eläkkeellä (ml. työkyvyttömyyseläke)	Suomi	2001	Itä-Uusimaa (ja HUS)	Kyllä	Perusterveydenhuollossa (esim. terveyskeskus tai - asema)		MS-tauti hoitotasapainossa, ei juuri toimintakykyhaittaa				0	0	0	1	0	2	En ollenkaan	En ollenkaan	Hyvä	Hyvä	En osaa sanoa	Kyllä, suurinpiirtein	Kyllä	En osaa sanoa	Kyllä	Kyllä	Ei	Ei	Ei	En osaa sanoa	Harvoin	En osaa sanoa	Joskus	Usein	Harvoin	Aina	Aina	Aina	Usein	En osaa sanoa	Usein	Usein	Aina	Harvoin
45-54	Nainen	Opistoasteen tutkinto	3	1	Eläkkeellä (ml. työkyvyttömyyseläke)	Suomi	2005	Pohjanmaa	Ei	Erikoissairaanhoidossa (esim. sairaalan neurologian poliklinikka)			MS-tauti hoitotasapainossa, arjen toimintakyky alentunut			45	5	0	0	3	3	En ollenkaan	En ollenkaan	Huono	Tyydyttävä	Kyllä, suurinpiirtein	Kyllä, suurinpiirtein	En osaa sanoa	Kyllä	Kyllä	Kyllä	En osaa sanoa	Kyllä	Ei	Ei koskaan	Ei koskaan	En osaa sanoa	Usein	Usein	Joskus	Joskus	Usein	Usein	Usein	Joskus	Joskus	Joskus	Harvoin	Usein
45-54	Nainen	Toinen aste (Lukio tai ammattikoulu)	2	0	Eläkkeellä (ml. työkyvyttömyyseläke)	Suomi	2011	Keski-Suomi	Ei	Erikoissairaanhoidossa (esim. sairaalan neurologian poliklinikka)			MS-tauti hoitotasapainossa, arjen toimintakyky alentunut			45	0	1	0	3	0	En ollenkaan	En ollenkaan	Kohtalainen	Erinomainen	Kyllä, varmasti	Kyllä, varmasti	Ei	Ei	Kyllä	Kyllä	Ei	Kyllä	En osaa sanoa	Ei koskaan	Ei koskaan	En osaa sanoa	Harvoin	Usein	Usein	Usein	Aina	Aina	Usein	Joskus	Aina	Usein	Usein	Joskus
55-64	Nainen	Toinen aste (Lukio tai ammattikoulu)	3	0	Täysipäiväinen	Suomi	2013	Keski-Suomi	En osaa sanoa	Erikoissairaanhoidossa (esim. sairaalan neurologian poliklinikka)		MS-tauti hoitotasapainossa, ei juuri toimintakykyhaittaa	MS-tauti hoitotasapainossa, arjen toimintakyky alentunut			1	0	5	1	2	6	En ollenkaan	En ollenkaan	Tyydyttävä	Hyvä	Kyllä, varmasti	Kyllä, varmasti	Kyllä	En osaa sanoa	Ei	Kyllä	Ei	Ei	Ei	Ei koskaan	Ei koskaan	En osaa sanoa	Harvoin	Aina	En osaa sanoa	Aina	Usein	Aina	Usein	Ei koskaan	Aina	En osaa sanoa	Aina	En osaa sanoa
45-54	Nainen	Toinen aste (Lukio tai ammattikoulu)	3	0	Täysipäiväinen	Suomi	2009	Pirkanmaa	Kyllä	Erikoissairaanhoidossa (esim. sairaalan neurologian poliklinikka)		MS-tauti hoitotasapainossa, ei juuri toimintakykyhaittaa				1	1	4	7	1	8	En ollenkaan	En ollenkaan	Hyvä	Hyvä	Ei	Kyllä, suurinpiirtein	Kyllä	Ei	Kyllä	Kyllä	Ei	Ei	Ei	Ei koskaan	Ei koskaan	En osaa sanoa	Harvoin	Aina	Joskus	Aina	Aina	Aina	Aina	Joskus	Aina	Joskus	En osaa sanoa	Ei koskaan
65-74	Nainen	Alempi korkeakoulututkinto	1 (Asun yksin)	0	Osa-aikainen	Suomi	2001	Pirkanmaa	Ei	Perusterveydenhuollossa (esim. terveyskeskus tai - asema)			MS-tauti hoitotasapainossa, arjen toimintakyky alentunut			0	0	4	2	0	5	En ollenkaan	En ollenkaan	Kohtalainen	Huono	Kyllä, varmasti	Kyllä, varmasti	En osaa sanoa	Ei	Ei	Ei	En osaa sanoa	Kyllä	Ei	En osaa sanoa	En osaa sanoa	En osaa sanoa	En osaa sanoa	En osaa sanoa	En osaa sanoa	En osaa sanoa	En osaa sanoa	En osaa sanoa	En osaa sanoa	En osaa sanoa	En osaa sanoa	En osaa sanoa	En osaa sanoa	En osaa sanoa
35-44	Nainen	Ylempi korkeakoulututkinto	1 (Asun yksin)	0	Täysipäiväinen	Suomi	2021	Kymenlaakso	Kyllä	Erikoissairaanhoidossa (esim. sairaalan neurologian poliklinikka)			MS-tauti hoitotasapainossa, arjen toimintakyky alentunut			6	2	8	4	3	2	En ollenkaan	En ollenkaan	Tyydyttävä	Erinomainen	Kyllä, varmasti	Kyllä, varmasti	Ei	Ei	Kyllä	Kyllä	Ei	Ei	Ei	Ei koskaan	Ei koskaan	En osaa sanoa	Harvoin	Aina	Aina	Aina	Aina	Aina	Usein	Harvoin	Usein	Joskus	Joskus	Joskus
55-64	Nainen	Opistoasteen tutkinto	2	0	Osa-aikainen	Suomi	2007	Varsinais-Suomi	Ei	Erikoissairaanhoidossa (esim. sairaalan neurologian poliklinikka)			MS-tauti hoitotasapainossa, arjen toimintakyky alentunut			17	1	5	5	17	7	En ollenkaan	Alle 7 päivää	Tyydyttävä	Tyydyttävä	Kyllä, suurinpiirtein	Kyllä, suurinpiirtein	Kyllä	Ei	Ei	Ei	Kyllä	Kyllä	Ei	Joskus	Ei koskaan	En osaa sanoa	Usein	Usein	Harvoin	Usein	Usein	Usein	Usein	Joskus	Joskus	Joskus	Joskus	Ei koskaan
45-54	Nainen	Ylempi korkeakoulututkinto	1 (Asun yksin)	0	Täysipäiväinen	Suomi	2021	Satakunta	Kyllä	Erikoissairaanhoidossa (esim. sairaalan neurologian poliklinikka)		MS-tauti hoitotasapainossa, ei juuri toimintakykyhaittaa				1	0	60	0	2	5	En ollenkaan	En ollenkaan	Hyvä	Hyvä	En osaa sanoa	En osaa sanoa	Kyllä	Kyllä	Kyllä	En osaa sanoa	Ei	Ei	Ei	Harvoin	En osaa sanoa	En osaa sanoa	Joskus	Usein	Usein	Usein	Usein	Usein	Usein	En osaa sanoa	En osaa sanoa	En osaa sanoa	Usein	En osaa sanoa
55-64	Mies	Opistoasteen tutkinto	2	0	Osa-aikainen	Suomi	2002	Helsinki (ja HUS)	Ei	Erikoissairaanhoidossa (esim. sairaalan neurologian poliklinikka)			MS-tauti hoitotasapainossa, arjen toimintakyky alentunut			1	1	2	0	1	2	En ollenkaan	En ollenkaan	Tyydyttävä	Erinomainen	En osaa sanoa	En osaa sanoa	Kyllä	Ei	Kyllä	Kyllä	Ei	Kyllä	Ei	Ei koskaan	Ei koskaan	En osaa sanoa	Ei koskaan	Aina	Aina	Aina	Aina	Aina	Usein	Usein	Aina	Aina	Usein	Harvoin
35-44	Nainen	Toinen aste (Lukio tai ammattikoulu)	3	1	Täysipäiväinen	Suomi	2005	Pohjois-Pohjanmaa	Ei	Erikoissairaanhoidossa (esim. sairaalan neurologian poliklinikka)		MS-tauti hoitotasapainossa, ei juuri toimintakykyhaittaa				1	1	5	2	1	2	En ollenkaan	En ollenkaan	Hyvä	Hyvä	En osaa sanoa	En osaa sanoa	Kyllä	Ei	Ei	Kyllä	Ei	Ei	Ei	Ei koskaan	Ei koskaan	En osaa sanoa	Harvoin	Joskus	Usein	Usein	Usein	Usein	Usein	Harvoin	En osaa sanoa	Ei koskaan	Usein	Ei koskaan
45-54	Nainen	Toinen aste (Lukio tai ammattikoulu)	2	0	Osa-aikainen	Suomi	2019	Varsinais-Suomi	Kyllä	Erikoissairaanhoidossa (esim. sairaalan neurologian poliklinikka)			MS-tauti hoitotasapainossa, arjen toimintakyky alentunut			4	3	12	1	6	7	En ollenkaan	En ollenkaan	Tyydyttävä	Hyvä	Ei	Kyllä, suurinpiirtein	Kyllä	Ei	Kyllä	Kyllä	Kyllä	Kyllä	Ei	Joskus	Ei koskaan	En osaa sanoa	Joskus	Usein	Ei koskaan	Usein	Usein	Usein	Aina	Ei koskaan	Joskus	Harvoin	Joskus	Ei koskaan
55-64	Nainen	Joku muu	2	0	Eläkkeellä (ml. työkyvyttömyyseläke)	Suomi	2000	Pohjois-Pohjanmaa	Ei	Perusterveydenhuollossa (esim. terveyskeskus tai - asema)			MS-tauti hoitotasapainossa, arjen toimintakyky alentunut			0	0	3	0	3	3	En ollenkaan	En ollenkaan	Kohtalainen	Tyydyttävä	Kyllä, suurinpiirtein	Ei	Kyllä	Ei	Ei	Kyllä	Ei	Kyllä	Ei	Harvoin	Ei koskaan	Ei koskaan	Harvoin	Usein	Harvoin	Usein	Usein	Usein	Usein	Harvoin	Usein	Joskus	Joskus	Harvoin
65-74	Mies	Toinen aste (Lukio tai ammattikoulu)	2	0	Eläkkeellä (ml. työkyvyttömyyseläke)	Suomi	2015	Kymenlaakso	Ei	Erikoissairaanhoidossa (esim. sairaalan neurologian poliklinikka)		MS-tauti hoitotasapainossa, ei juuri toimintakykyhaittaa	MS-tauti hoitotasapainossa, arjen toimintakyky alentunut			1	0	0	0	lääkäri	0	En ollenkaan	En ollenkaan	Hyvä	Hyvä	Kyllä, suurinpiirtein	Kyllä, suurinpiirtein	Kyllä	Ei	Ei	Kyllä	Ei	Ei	Ei	Ei koskaan	Ei koskaan	En osaa sanoa	Harvoin	Aina	Aina	Aina	Aina	Aina	Aina	Usein	Aina	Aina	Aina	En osaa sanoa
35-44	Mies	Toinen aste (Lukio tai ammattikoulu)	1 (Asun yksin)	0	Täysipäiväinen	Suomi	2015	Helsinki (ja HUS)	Kyllä	Erikoissairaanhoidossa (esim. sairaalan neurologian poliklinikka)			MS-tauti hoitotasapainossa, arjen toimintakyky alentunut			0	1	0	1	0	1	En ollenkaan	En ollenkaan	Hyvä	Huono	Kyllä, suurinpiirtein	Kyllä, suurinpiirtein	Kyllä	En osaa sanoa	Kyllä	Ei	Kyllä	En osaa sanoa	En osaa sanoa	Ei koskaan	Ei koskaan	En osaa sanoa	Aina	Joskus	Harvoin	Joskus	Joskus	Harvoin	Aina	Ei koskaan	Harvoin	Harvoin	En osaa sanoa	Harvoin
75 tai vanhempi	Nainen	Toinen aste (Lukio tai ammattikoulu)	2	0	Eläkkeellä (ml. työkyvyttömyyseläke)	Suomi	2002	Päijät-Häme	Ei	En osaa sanoa				MS-tauti ei hoitotasapainossa (esim. pahenemisvaihe)		0	0	1	0	0	1	En ollenkaan	En ollenkaan	Kohtalainen	En osaa sanoa	Ei	Kyllä, suurinpiirtein	Ei	Ei	Ei	Ei	Ei	Ei	Ei	En osaa sanoa	En osaa sanoa	En osaa sanoa	En osaa sanoa	En osaa sanoa	En osaa sanoa	En osaa sanoa	En osaa sanoa	En osaa sanoa	En osaa sanoa	En osaa sanoa	En osaa sanoa	En osaa sanoa	En osaa sanoa	En osaa sanoa
35-44	Nainen	Ylempi korkeakoulututkinto	4	2	Täysipäiväinen	Suomi	2012	Helsinki (ja HUS)	Ei	Erikoissairaanhoidossa (esim. sairaalan neurologian poliklinikka)		MS-tauti hoitotasapainossa, ei juuri toimintakykyhaittaa				1	1	0	0	1	1	En ollenkaan	En ollenkaan	Erinomainen	Hyvä	Kyllä, suurinpiirtein	Kyllä, varmasti	Ei	Ei	Ei	Kyllä	Ei	Kyllä	Ei	Ei koskaan	Ei koskaan	En osaa sanoa	Ei koskaan	Aina	Aina	Aina	Aina	Aina	Usein	Ei koskaan	Harvoin	Harvoin	En osaa sanoa	Ei koskaan
55-64	Nainen	Toinen aste (Lukio tai ammattikoulu)	4	1	Osa-aikainen	Suomi	2012	Keski-Suomi	Kyllä	Erikoissairaanhoidossa (esim. sairaalan neurologian poliklinikka)			MS-tauti hoitotasapainossa, arjen toimintakyky alentunut			2	0	8	14	1	10	En ollenkaan	En ollenkaan	Kohtalainen	Huono	Ei	Ei	Kyllä	Kyllä	Ei	Ei	Kyllä	Kyllä	Kyllä	Ei koskaan	En osaa sanoa	En osaa sanoa	Usein	Joskus	Usein	Joskus	Usein	Usein	Usein	Ei koskaan	Harvoin	Ei koskaan	Ei koskaan	Ei koskaan
45-54	Mies	Alempi korkeakoulututkinto	4	2	Muu	Suomi	2003	Pirkanmaa	Ei	Erikoissairaanhoidossa (esim. sairaalan neurologian poliklinikka)		MS-tauti hoitotasapainossa, ei juuri toimintakykyhaittaa				1	1	2	5	1	4	En ollenkaan	En ollenkaan	Hyvä	Hyvä	En osaa sanoa	En osaa sanoa	Kyllä	Ei	Kyllä	Kyllä	Ei	Kyllä	En osaa sanoa	Ei koskaan	Ei koskaan	En osaa sanoa	Ei koskaan	Aina	Usein	Aina	Joskus	Aina	Usein	Joskus	Aina	Aina	Aina	Joskus
45-54	Nainen	Ylempi korkeakoulututkinto	5 tai enemmän	2	Täysipäiväinen	Suomi	2002	Varsinais-Suomi	Ei	Erikoissairaanhoidossa (esim. sairaalan neurologian poliklinikka)		MS-tauti hoitotasapainossa, ei juuri toimintakykyhaittaa				4	0	6	0	0	0	En ollenkaan	En ollenkaan	Tyydyttävä	Hyvä	Ei	Ei	En osaa sanoa	Kyllä	Kyllä	Kyllä	Ei	Kyllä	Kyllä	Harvoin	Ei koskaan	En osaa sanoa	Joskus	Usein	Joskus	Aina	Aina	Aina	Aina	Ei koskaan	Aina	Joskus	Aina	Ei koskaan
25-34	Nainen	Ylempi korkeakoulututkinto	3	1	Täysipäiväinen	Suomi	2009	Varsinais-Suomi	Ei	Erikoissairaanhoidossa (esim. sairaalan neurologian poliklinikka)			MS-tauti hoitotasapainossa, arjen toimintakyky alentunut			3	0	3	2	4	5	En ollenkaan	En ollenkaan	Hyvä	Hyvä	Kyllä, varmasti	Kyllä, varmasti	Ei	En osaa sanoa	Kyllä	Kyllä	En osaa sanoa	Kyllä	Ei	Ei koskaan	Ei koskaan	Usein	Usein	Joskus	Usein	Joskus	Usein	Usein	Aina	Joskus	Usein	Harvoin	Aina	Ei koskaan
25-34	Nainen	Toinen aste (Lukio tai ammattikoulu)	2	1	Osa-aikainen	Suomi	2013	Kymenlaakso	Ei	Erikoissairaanhoidossa (esim. sairaalan neurologian poliklinikka)			MS-tauti hoitotasapainossa, arjen toimintakyky alentunut			50	0	5	2	4	2	Alle 7 päivää	Yli 7 päivää	Tyydyttävä	Hyvä	Kyllä, suurinpiirtein	Kyllä, suurinpiirtein	Kyllä	Ei	Kyllä	Kyllä	Ei	Ei	Ei	Ei koskaan	Ei koskaan	En osaa sanoa	Harvoin	Joskus	Joskus	Joskus	Joskus	Usein	Harvoin	Ei koskaan	Joskus	Joskus	Joskus	Harvoin
35-44	Nainen	Ylempi korkeakoulututkinto	1 (Asun yksin)	0	Täysipäiväinen	Suomi	2010	Päijät-Häme	Ei	Erikoissairaanhoidossa (esim. sairaalan neurologian poliklinikka)		MS-tauti hoitotasapainossa, ei juuri toimintakykyhaittaa				1	0	1	1	1	2	En ollenkaan	En ollenkaan	Hyvä	Hyvä	Kyllä, suurinpiirtein	Ei	En osaa sanoa	Ei	Kyllä	Kyllä	Ei	Ei	Ei	Ei koskaan	Ei koskaan	En osaa sanoa	Joskus	Aina	Joskus	Aina	Aina	Aina	Aina	Joskus	Usein	Joskus	Aina	Joskus
45-54	Nainen	Opistoasteen tutkinto	1 (Asun yksin)	0	Täysipäiväinen	Suomi	2003	Varsinais-Suomi	Kyllä	Erikoissairaanhoidossa (esim. sairaalan neurologian poliklinikka)		MS-tauti hoitotasapainossa, ei juuri toimintakykyhaittaa				1	0	20	10	3	3	En ollenkaan	En ollenkaan	Hyvä	Erinomainen	Kyllä, suurinpiirtein	Kyllä, varmasti	Kyllä	Kyllä	Ei	Kyllä	Ei	Kyllä	Ei	Ei koskaan	Ei koskaan	En osaa sanoa	Harvoin	Usein	Harvoin	Usein	Aina	Aina	Usein	Joskus	Usein	Usein	Aina	Ei koskaan
35-44	Muu	Alempi korkeakoulututkinto	1 (Asun yksin)	0	Eläkkeellä (ml. työkyvyttömyyseläke)	Suomi	2012	Itä-Uusimaa (ja HUS)	Kyllä	Erikoissairaanhoidossa (esim. sairaalan neurologian poliklinikka)			MS-tauti hoitotasapainossa, arjen toimintakyky alentunut			33	2	1	2	4	2	En ollenkaan	En ollenkaan	Tyydyttävä	Erinomainen	Kyllä, suurinpiirtein	Kyllä, suurinpiirtein	Kyllä	En osaa sanoa	Kyllä	Kyllä	Ei	Kyllä	En osaa sanoa	Ei koskaan	Ei koskaan	En osaa sanoa	Harvoin	Aina	Aina	Aina	Aina	Aina	Aina	En osaa sanoa	Usein	En osaa sanoa	Usein	Usein
35-44	Nainen	Ylempi korkeakoulututkinto	1 (Asun yksin)	0	Täysipäiväinen	Suomi	2015	Helsinki (ja HUS)	Ei	Erikoissairaanhoidossa (esim. sairaalan neurologian poliklinikka)			MS-tauti hoitotasapainossa, arjen toimintakyky alentunut	MS-tauti ei hoitotasapainossa (esim. pahenemisvaihe)		10	4	3	2	5	5	En ollenkaan	En ollenkaan	Tyydyttävä	Kohtalainen	Kyllä, suurinpiirtein	Kyllä, varmasti	Kyllä	Kyllä	Kyllä	Ei	Kyllä	Kyllä	Ei	Ei koskaan	Ei koskaan	En osaa sanoa	Usein	Joskus	Harvoin	Joskus	Joskus	Harvoin	Joskus	Harvoin	Harvoin	Harvoin	Harvoin	Ei koskaan
55-64	Nainen	Peruskoulu	2	0	Eläkkeellä (ml. työkyvyttömyyseläke)	Suomi	2002	Varsinais-Suomi	Ei	Erikoissairaanhoidossa (esim. sairaalan neurologian poliklinikka)			MS-tauti hoitotasapainossa, arjen toimintakyky alentunut			1	3	6	3	1	1	En ollenkaan	En ollenkaan	Kohtalainen	Hyvä	Kyllä, varmasti	Kyllä, varmasti	Kyllä	Ei	Kyllä	Kyllä	Ei	Kyllä	Kyllä	Ei koskaan	Ei koskaan	En osaa sanoa	Harvoin	Aina	Usein	Aina	Aina	Aina	Aina	Joskus	Usein	Usein	Usein	Joskus
55-64	Mies	Toinen aste (Lukio tai ammattikoulu)	2	0	Eläkkeellä (ml. työkyvyttömyyseläke)	Suomi	2023	Varsinais-Suomi	Kyllä	Erikoissairaanhoidossa (esim. sairaalan neurologian poliklinikka)	Uusi MS-tauti diagnoosi			MS-tauti ei hoitotasapainossa (esim. pahenemisvaihe)		10	2	5	3	5	4	En halua sanoa	En ollenkaan	Kohtalainen	Hyvä	En osaa sanoa	Ei	En osaa sanoa	Kyllä	Kyllä	En osaa sanoa	Ei	Kyllä	Kyllä	Ei koskaan	Ei koskaan	Ei koskaan	Harvoin	Joskus	Ei koskaan	Joskus	Joskus	Joskus	Usein	Usein	Joskus	Usein	Usein	Ei koskaan
55-64	Nainen	Opistoasteen tutkinto	1 (Asun yksin)	0	Eläkkeellä (ml. työkyvyttömyyseläke)	Suomi	2003	Pirkanmaa	Ei	Perusterveydenhuollossa (esim. terveyskeskus tai - asema)			MS-tauti hoitotasapainossa, arjen toimintakyky alentunut	MS-tauti ei hoitotasapainossa (esim. pahenemisvaihe)		70	20	1	0	2	1	En ollenkaan	Yli 7 päivää	Huono	Huono	En osaa sanoa	En osaa sanoa	Ei	Kyllä	Ei	Ei	Kyllä	Kyllä	Ei	En osaa sanoa	Ei koskaan	Ei koskaan	Aina	Joskus	Harvoin	Usein	Usein	Usein	Harvoin	Harvoin	Joskus	Harvoin	Joskus	Harvoin
55-64	Nainen	Alempi korkeakoulututkinto	1 (Asun yksin)	0	Eläkkeellä (ml. työkyvyttömyyseläke)	Suomi	2008	Helsinki (ja HUS)	Ei	Perusterveydenhuollossa (esim. terveyskeskus tai - asema)				MS-tauti ei hoitotasapainossa (esim. pahenemisvaihe)		1	0	0	0	1	0	En ollenkaan	En ollenkaan	Huono	Huono	Ei	Kyllä, suurinpiirtein	Kyllä	En osaa sanoa	Ei	Ei	Kyllä	Kyllä	Ei	En osaa sanoa	En osaa sanoa	En osaa sanoa	En osaa sanoa	En osaa sanoa	En osaa sanoa	En osaa sanoa	En osaa sanoa	En osaa sanoa	En osaa sanoa	En osaa sanoa	En osaa sanoa	En osaa sanoa	En osaa sanoa	En osaa sanoa
45-54	Mies	Alempi korkeakoulututkinto	1 (Asun yksin)	0	Täysipäiväinen	Suomi	2002	Helsinki (ja HUS)	Kyllä	Erikoissairaanhoidossa (esim. sairaalan neurologian poliklinikka)		MS-tauti hoitotasapainossa, ei juuri toimintakykyhaittaa				40	0	1	0	40	1	En ollenkaan	En ollenkaan	Tyydyttävä	Tyydyttävä	Kyllä, suurinpiirtein	Ei	Ei	Kyllä	Kyllä	Kyllä	Ei	Kyllä	Ei	Harvoin	Ei koskaan	Ei koskaan	Usein	Usein	Joskus	Usein	Usein	Usein	Usein	Harvoin	Harvoin	Joskus	Joskus	Ei koskaan
55-64	Nainen	Opistoasteen tutkinto	2	0	Eläkkeellä (ml. työkyvyttömyyseläke)	Suomi	2017	Pohjois-Pohjanmaa	Kyllä	Erikoissairaanhoidossa (esim. sairaalan neurologian poliklinikka)			MS-tauti hoitotasapainossa, arjen toimintakyky alentunut			8	0	6	0	4	4	En ollenkaan	Alle 7 päivää	Kohtalainen	Hyvä	Kyllä, varmasti	Kyllä, varmasti	Kyllä	Kyllä	Kyllä	Kyllä	Ei	Kyllä	Ei	Ei koskaan	Ei koskaan	En osaa sanoa	Harvoin	Usein	Harvoin	Joskus	Joskus	Joskus	Usein	Ei koskaan	En osaa sanoa	Ei koskaan	En osaa sanoa	Ei koskaan
65-74	Nainen	Ylempi korkeakoulututkinto	2	0	Eläkkeellä (ml. työkyvyttömyyseläke)	Ruotsi	1980	Pohjanmaa	Ei	Perusterveydenhuollossa (esim. terveyskeskus tai - asema)			MS-tauti hoitotasapainossa, arjen toimintakyky alentunut			40	2	5	5	4	1	En ollenkaan	Yli 7 päivää	Kohtalainen	Hyvä	Kyllä, suurinpiirtein	Kyllä, varmasti	Kyllä	En osaa sanoa	Ei	En osaa sanoa	Kyllä	Kyllä	Kyllä	Harvoin	Ei koskaan	En osaa sanoa	Harvoin	Usein	Harvoin	Usein	Usein	Joskus	Usein	Harvoin	Harvoin	Usein	Usein	Joskus
45-54	Nainen	Toinen aste (Lukio tai ammattikoulu)	2	0	Eläkkeellä (ml. työkyvyttömyyseläke)	Suomi	2004	Pohjois-Pohjanmaa	Kyllä	Erikoissairaanhoidossa (esim. sairaalan neurologian poliklinikka)			MS-tauti hoitotasapainossa, arjen toimintakyky alentunut			2	2	2	1	2	2	En ollenkaan	En ollenkaan	Hyvä	Hyvä	En osaa sanoa	Ei	Kyllä	En osaa sanoa	Kyllä	Kyllä	Ei	Ei	Ei	Harvoin	Ei koskaan	Ei koskaan	Usein	Aina	Usein	Usein	Usein	Usein	Usein	Harvoin	Aina	Usein	Aina	Joskus
45-54	Nainen	Alempi korkeakoulututkinto	2	0	Eläkkeellä (ml. työkyvyttömyyseläke)	Suomi	2016	Satakunta	Ei	Erikoissairaanhoidossa (esim. sairaalan neurologian poliklinikka)			MS-tauti hoitotasapainossa, arjen toimintakyky alentunut			0	0	2	1	0	1	En ollenkaan	En ollenkaan	Hyvä	Hyvä	Ei	Ei	Kyllä	Ei	Ei	Kyllä	Ei	Kyllä	Ei	Ei koskaan	Ei koskaan	En osaa sanoa	Joskus	Joskus	Ei koskaan	Joskus	Joskus	Usein	Aina	Harvoin	Usein	Ei koskaan	Harvoin	Ei koskaan
45-54	Nainen	Alempi korkeakoulututkinto	3	1	Osa-aikainen	Suomi	1999	Pohjois-Savo	Ei	Erikoissairaanhoidossa (esim. sairaalan neurologian poliklinikka)		MS-tauti hoitotasapainossa, ei juuri toimintakykyhaittaa				2	0	0	0	0	0	En ollenkaan	En ollenkaan	Hyvä	Hyvä	En osaa sanoa	En osaa sanoa	Ei	Ei	Ei	Ei	Ei	Ei	Ei	Ei koskaan	Ei koskaan	En osaa sanoa	Usein	Joskus	Joskus	Usein	Usein	Usein	Joskus	Ei koskaan	Harvoin	Ei koskaan	Usein	En osaa sanoa
55-64	Nainen	Opistoasteen tutkinto	2	0	Täysipäiväinen	Suomi	2012	Kymenlaakso	Kyllä	Erikoissairaanhoidossa (esim. sairaalan neurologian poliklinikka)		MS-tauti hoitotasapainossa, ei juuri toimintakykyhaittaa				5	2	10	2	3	5	En ollenkaan	En ollenkaan	Tyydyttävä	Hyvä	Kyllä, suurinpiirtein	Kyllä, suurinpiirtein	Kyllä	Kyllä	Kyllä	Kyllä	Ei	Kyllä	Kyllä	Ei koskaan	En osaa sanoa	En osaa sanoa	Joskus	Usein	Usein	Usein	Aina	Aina	Aina	Harvoin	Usein	Joskus	Usein	En osaa sanoa
45-54	Nainen	Alempi korkeakoulututkinto	3	1	Muu	Suomi	2004	Länsi-Uusimaa (ja HUS)	Ei	Perusterveydenhuollossa (esim. terveyskeskus tai - asema)			MS-tauti hoitotasapainossa, arjen toimintakyky alentunut			1	0	3	0	1	2	En ollenkaan	Yli 7 päivää	Kohtalainen	Kohtalainen	Kyllä, suurinpiirtein	Kyllä, varmasti	En osaa sanoa	Ei	Ei	En osaa sanoa	Kyllä	Kyllä	Ei	Ei koskaan	Ei koskaan	En osaa sanoa	Usein	En osaa sanoa	Joskus	Ei koskaan	Usein	Usein	Usein	Ei koskaan	En osaa sanoa	Ei koskaan	Ei koskaan	Harvoin
45-54	Mies	Opistoasteen tutkinto	1 (Asun yksin)	0	Eläkkeellä (ml. työkyvyttömyyseläke)	Suomi	2014	Länsi-Uusimaa (ja HUS)	Ei	Erikoissairaanhoidossa (esim. sairaalan neurologian poliklinikka)			MS-tauti hoitotasapainossa, arjen toimintakyky alentunut			2	0	10	0	1	8	En ollenkaan	Yli 7 päivää	Tyydyttävä	Erinomainen	Kyllä, suurinpiirtein	Kyllä, suurinpiirtein	Kyllä	Kyllä	Kyllä	Kyllä	Kyllä	Kyllä	Kyllä	Ei koskaan	Ei koskaan	Ei koskaan	Harvoin	Aina	Aina	Aina	Aina	Aina	Aina	Usein	Usein	Aina	Aina	Joskus
55-64	Nainen	Peruskoulu	1 (Asun yksin)	0	Työtön	Suomi	2023	Varsinais-Suomi	Ei	Erikoissairaanhoidossa (esim. sairaalan neurologian poliklinikka)	Uusi MS-tauti diagnoosi	MS-tauti hoitotasapainossa, ei juuri toimintakykyhaittaa				2	0	2	0	3	0	Alle 7 päivää	En ollenkaan	Tyydyttävä	Hyvä	Kyllä, suurinpiirtein	Kyllä, varmasti	Kyllä	Kyllä	Ei	Kyllä	Ei	Kyllä	Ei	En osaa sanoa	En osaa sanoa	En osaa sanoa	Joskus	Usein	Ei koskaan	Aina	Usein	Usein	Usein	Ei koskaan	Ei koskaan	Ei koskaan	Ei koskaan	Ei koskaan
45-54	Nainen	Ylempi korkeakoulututkinto	2	0	Eläkkeellä (ml. työkyvyttömyyseläke)	Suomi	2002	Keski-Pohjanmaa	Kyllä	Erikoissairaanhoidossa (esim. sairaalan neurologian poliklinikka)			MS-tauti hoitotasapainossa, arjen toimintakyky alentunut			81	2	9	5	4	6	En ollenkaan	En ollenkaan	Huono	Kohtalainen	Ei	Kyllä, suurinpiirtein	Kyllä	Ei	Ei	Ei	Kyllä	Kyllä	Ei	Ei koskaan	Ei koskaan	En osaa sanoa	Usein	Joskus	Ei koskaan	Harvoin	Harvoin	Harvoin	Ei koskaan	Ei koskaan	Ei koskaan	Ei koskaan	Harvoin	Ei koskaan
45-54	Nainen	Toinen aste (Lukio tai ammattikoulu)	2	0	Täysipäiväinen	Suomi	2011	Päijät-Häme	Ei	Erikoissairaanhoidossa (esim. sairaalan neurologian poliklinikka)			MS-tauti hoitotasapainossa, arjen toimintakyky alentunut			2	0	1	0	3	0	En ollenkaan	En ollenkaan	Tyydyttävä	Hyvä	Kyllä, suurinpiirtein	Ei	Kyllä	Kyllä	Ei	Kyllä	Ei	Ei	Ei	Ei koskaan	Ei koskaan	En osaa sanoa	Ei koskaan	Aina	Aina	Aina	Aina	Aina	Aina	Harvoin	Aina	Aina	Usein	Joskus
45-54	Nainen	Alempi korkeakoulututkinto	4	2	Osa-aikainen	Muu	2010	Etelä-Pohjanmaa	Ei	Erikoissairaanhoidossa (esim. sairaalan neurologian poliklinikka)			MS-tauti hoitotasapainossa, arjen toimintakyky alentunut			5	0	2	0	3	2	En ollenkaan	En ollenkaan	Hyvä	Hyvä	Kyllä, suurinpiirtein	Kyllä, varmasti	Kyllä	Ei	Ei	Kyllä	Ei	Ei	Ei	Usein	Ei koskaan	En osaa sanoa	Joskus	Aina	Joskus	Aina	Aina	Aina	Aina	Ei koskaan	En osaa sanoa	Joskus	Joskus	Joskus
35-44	Nainen	Alempi korkeakoulututkinto	2	0	Osa-aikainen	Suomi	2011	Pohjois-Savo	En osaa sanoa	Erikoissairaanhoidossa (esim. sairaalan neurologian poliklinikka)			MS-tauti hoitotasapainossa, arjen toimintakyky alentunut			30	0	10	0	3	2	En ollenkaan	Alle 7 päivää	Tyydyttävä	Hyvä	Kyllä, suurinpiirtein	Kyllä, suurinpiirtein	Ei	Kyllä	Kyllä	Kyllä	Ei	En osaa sanoa	Kyllä	Ei koskaan	Ei koskaan	En osaa sanoa	Harvoin	Usein	Usein	Usein	Usein	Usein	Usein	En osaa sanoa	Joskus	En osaa sanoa	Joskus	En osaa sanoa
45-54	Mies	Ylempi korkeakoulututkinto	3	0	Eläkkeellä (ml. työkyvyttömyyseläke)	Suomi	2018	Pohjois-Pohjanmaa	Kyllä	Perusterveydenhuollossa (esim. terveyskeskus tai - asema)			MS-tauti hoitotasapainossa, arjen toimintakyky alentunut			50	0	2	2	3	2	En ollenkaan	En ollenkaan	Huono	Kohtalainen	Kyllä, suurinpiirtein	Ei	Kyllä	Ei	Ei	Kyllä	Ei	Kyllä	Ei	Harvoin	Ei koskaan	En osaa sanoa	Harvoin	Usein	Harvoin	Usein	Usein	Usein	Aina	Harvoin	Joskus	Joskus	Joskus	Joskus
45-54	Nainen	Toinen aste (Lukio tai ammattikoulu)	1 (Asun yksin)	0	Täysipäiväinen	Suomi	2005	Satakunta	Ei	En osaa sanoa		MS-tauti hoitotasapainossa, ei juuri toimintakykyhaittaa				0	0	6	0	0	6	En ollenkaan	En ollenkaan	Hyvä	Hyvä	En osaa sanoa	En osaa sanoa	En osaa sanoa	En osaa sanoa	Ei	Kyllä	Ei	En osaa sanoa	Ei	En osaa sanoa	En osaa sanoa	En osaa sanoa	En osaa sanoa	En osaa sanoa	En osaa sanoa	En osaa sanoa	En osaa sanoa	En osaa sanoa	En osaa sanoa	En osaa sanoa	En osaa sanoa	En osaa sanoa	En osaa sanoa	En osaa sanoa
65-74	Mies	Ylempi korkeakoulututkinto	2	0	Eläkkeellä (ml. työkyvyttömyyseläke)	Muu	1993	Varsinais-Suomi	Ei	Erikoissairaanhoidossa (esim. sairaalan neurologian poliklinikka)			MS-tauti hoitotasapainossa, arjen toimintakyky alentunut			1	0	18	0	1	3	En ollenkaan	En ollenkaan	Tyydyttävä	Hyvä	Kyllä, suurinpiirtein	Kyllä, suurinpiirtein	Kyllä	Kyllä	Ei	Kyllä	Ei	Ei	Ei	Harvoin	Ei koskaan	En osaa sanoa	Ei koskaan	Usein	Aina	Aina	Aina	Aina	Aina	Ei koskaan	En osaa sanoa	Usein	Usein	Ei koskaan
35-44	Nainen	Alempi korkeakoulututkinto	1 (Asun yksin)	0	Osa-aikainen	Suomi	2018	Päijät-Häme	En osaa sanoa	Erikoissairaanhoidossa (esim. sairaalan neurologian poliklinikka)			MS-tauti hoitotasapainossa, arjen toimintakyky alentunut			2	5	5	1	4	4	En ollenkaan	Yli 7 päivää	Huono	Kohtalainen	En osaa sanoa	Kyllä, suurinpiirtein	Kyllä	Ei	Ei	Ei	Kyllä	Kyllä	Ei	Ei koskaan	Ei koskaan	En osaa sanoa	Aina	Harvoin	Ei koskaan	Joskus	Usein	Usein	Joskus	Ei koskaan	En osaa sanoa	Ei koskaan	Harvoin	Ei koskaan
25-34	Nainen	Alempi korkeakoulututkinto	1 (Asun yksin)	0	Täysipäiväinen	Suomi	2021	Varsinais-Suomi	Ei	Erikoissairaanhoidossa (esim. sairaalan neurologian poliklinikka)			MS-tauti hoitotasapainossa, arjen toimintakyky alentunut			1	0	0	3	1	1	En ollenkaan	En ollenkaan	Tyydyttävä	Hyvä	Kyllä, suurinpiirtein	Kyllä, varmasti	Kyllä	Ei	Kyllä	Kyllä	Ei	Kyllä	Ei	Harvoin	En osaa sanoa	En osaa sanoa	Usein	Usein	Joskus	Usein	Usein	Usein	Joskus	Harvoin	Joskus	Ei koskaan	Joskus	Ei koskaan
35-44	Nainen	Ylempi korkeakoulututkinto	2	0	Täysipäiväinen	Suomi	2021	Etelä-Savo	Ei	Erikoissairaanhoidossa (esim. sairaalan neurologian poliklinikka)			MS-tauti hoitotasapainossa, arjen toimintakyky alentunut			3	10	2	0	3	1	En ollenkaan	Alle 7 päivää	Tyydyttävä	Hyvä	Kyllä, suurinpiirtein	Kyllä, suurinpiirtein	Ei	Kyllä	Ei	Kyllä	Ei	Kyllä	Kyllä	Ei koskaan	Ei koskaan	Ei koskaan	Ei koskaan	Aina	Aina	Aina	Aina	Aina	Aina	Usein	Usein	Aina	Usein	Harvoin
65-74	Nainen	Opistoasteen tutkinto	1 (Asun yksin)	0	Eläkkeellä (ml. työkyvyttömyyseläke)	Suomi	2005	Päijät-Häme	En osaa sanoa	Perusterveydenhuollossa (esim. terveyskeskus tai - asema)			MS-tauti hoitotasapainossa, arjen toimintakyky alentunut			0	0	2	0	0	2	En ollenkaan	En ollenkaan	Kohtalainen	Kohtalainen	En osaa sanoa	En osaa sanoa	Kyllä	Kyllä	Ei	Kyllä	Ei	Ei	Ei	Ei koskaan	Ei koskaan	Ei koskaan	Joskus	Joskus	Joskus	Harvoin	Joskus	Joskus	Harvoin	Ei koskaan	Joskus	Joskus	Joskus	Joskus
55-64	Nainen	Opistoasteen tutkinto	3	0	Eläkkeellä (ml. työkyvyttömyyseläke)	Suomi	1987	Pirkanmaa	Kyllä	Perusterveydenhuollossa (esim. terveyskeskus tai - asema)			MS-tauti hoitotasapainossa, arjen toimintakyky alentunut			5	2	5	2	5 henkilöä	4	Yli 7 päivää	Yli 7 päivää	Huono	Hyvä	Kyllä, suurinpiirtein	Kyllä, varmasti	Kyllä	Kyllä	Kyllä	Kyllä	Ei	Ei	Ei	En osaa sanoa	En osaa sanoa	En osaa sanoa	En osaa sanoa	Usein	Usein	Aina	Aina	Aina	Aina	Joskus	Aina	Usein	Aina	En osaa sanoa
55-64	Nainen	Ylempi korkeakoulututkinto	5 tai enemmän	2	Eläkkeellä (ml. työkyvyttömyyseläke)	Suomi	2017	Etelä-Savo	Kyllä	Erikoissairaanhoidossa (esim. sairaalan neurologian poliklinikka)			MS-tauti hoitotasapainossa, arjen toimintakyky alentunut			5	0	5	0	12	5	En ollenkaan	Yli 7 päivää	Kohtalainen	Tyydyttävä	Ei	Kyllä, suurinpiirtein	Kyllä	Ei	Ei	Kyllä	Kyllä	Kyllä	En osaa sanoa	Joskus	Ei koskaan	En osaa sanoa	Usein	Usein	Harvoin	Joskus	Joskus	Joskus	Harvoin	Usein	Joskus	Joskus	Joskus	Joskus
55-64	Nainen	Alempi korkeakoulututkinto	1 (Asun yksin)	0	Täysipäiväinen	Suomi	2003	Helsinki (ja HUS)	Kyllä	En osaa sanoa		MS-tauti hoitotasapainossa, ei juuri toimintakykyhaittaa				0	0	5	0	0	2	En ollenkaan	En ollenkaan	Huono	Huono	Ei	Kyllä, suurinpiirtein	En osaa sanoa	En osaa sanoa	Ei	Kyllä	Kyllä	Kyllä	Ei	En osaa sanoa	En osaa sanoa	En osaa sanoa	En osaa sanoa	En osaa sanoa	En osaa sanoa	En osaa sanoa	En osaa sanoa	En osaa sanoa	En osaa sanoa	En osaa sanoa	En osaa sanoa	En osaa sanoa	En osaa sanoa	En osaa sanoa
25-34	Nainen	Alempi korkeakoulututkinto	1 (Asun yksin)	0	Eläkkeellä (ml. työkyvyttömyyseläke)	Suomi	2012	Varsinais-Suomi	Ei	Erikoissairaanhoidossa (esim. sairaalan neurologian poliklinikka)			MS-tauti hoitotasapainossa, arjen toimintakyky alentunut			2	3	0	0	4	0	En ollenkaan	En ollenkaan	Tyydyttävä	Hyvä	Kyllä, varmasti	Kyllä, varmasti	Kyllä	Kyllä	Kyllä	Kyllä	Kyllä	Kyllä	Kyllä	Ei koskaan	Ei koskaan	En osaa sanoa	Harvoin	Aina	Aina	Aina	Aina	Aina	Aina	Harvoin	Aina	Aina	Aina	En osaa sanoa
65-74	Mies	Opistoasteen tutkinto	2	0	Eläkkeellä (ml. työkyvyttömyyseläke)	Suomi	1998	Pohjois-Pohjanmaa	Kyllä	Perusterveydenhuollossa (esim. terveyskeskus tai - asema)			MS-tauti hoitotasapainossa, arjen toimintakyky alentunut			0	0	3	0	0	3	En ollenkaan	En ollenkaan	Tyydyttävä	Tyydyttävä	En osaa sanoa	Ei	Ei	Ei	Ei	En osaa sanoa	Kyllä	Kyllä	Ei	Aina	Ei koskaan	Ei koskaan	Aina	Ei koskaan	Ei koskaan	Joskus	Joskus	Joskus	Usein	Joskus	En osaa sanoa	Ei koskaan	Joskus	Joskus
55-64	Mies	Toinen aste (Lukio tai ammattikoulu)	2	0	Eläkkeellä (ml. työkyvyttömyyseläke)	Suomi	2014	Pohjois-Pohjanmaa	Ei	Erikoissairaanhoidossa (esim. sairaalan neurologian poliklinikka)			MS-tauti hoitotasapainossa, arjen toimintakyky alentunut			35	0	0	0	8	0	Alle 7 päivää	Yli 7 päivää	Kohtalainen	Tyydyttävä	Kyllä, suurinpiirtein	Kyllä, suurinpiirtein	Kyllä	Kyllä	Kyllä	Kyllä	Ei	Ei	Kyllä	Ei koskaan	En osaa sanoa	En osaa sanoa	Joskus	Usein	Usein	Usein	Aina	Aina	Usein	Joskus	Usein	Aina	Usein	Joskus
35-44	Nainen	Alempi korkeakoulututkinto	4	2	Osa-aikainen	Suomi	2013	Varsinais-Suomi	Ei	Erikoissairaanhoidossa (esim. sairaalan neurologian poliklinikka)		MS-tauti hoitotasapainossa, ei juuri toimintakykyhaittaa				1	0	2	1	2	2	En ollenkaan	En ollenkaan	Hyvä	Hyvä	Ei	Kyllä, suurinpiirtein	Kyllä	Kyllä	Kyllä	Kyllä	Ei	Ei	Ei	Ei koskaan	En osaa sanoa	En osaa sanoa	Ei koskaan	Usein	Usein	Usein	Joskus	Joskus	Usein	Joskus	Joskus	Usein	Usein	Joskus
65-74	Nainen	Opistoasteen tutkinto	2	0	Eläkkeellä (ml. työkyvyttömyyseläke)	Suomi	2014	Keski-Uusimaa (ja HUS)	Kyllä	Erikoissairaanhoidossa (esim. sairaalan neurologian poliklinikka)				MS-tauti ei hoitotasapainossa (esim. pahenemisvaihe)		14	1	8	0	12	8	En ollenkaan	En ollenkaan	Huono	Kohtalainen	Ei	Ei	Ei	Ei	Kyllä	Kyllä	Kyllä	Kyllä	Kyllä	Usein	Ei koskaan	En osaa sanoa	Aina	Joskus	Harvoin	Joskus	Joskus	Joskus	Usein	Ei koskaan	Joskus	Joskus	Joskus	Ei koskaan
55-64	Nainen	Opistoasteen tutkinto	2	0	Osa-aikainen	Suomi	2000	Helsinki (ja HUS)	Ei	Erikoissairaanhoidossa (esim. sairaalan neurologian poliklinikka)		MS-tauti hoitotasapainossa, ei juuri toimintakykyhaittaa				1	4	1	0	2	1	En ollenkaan	En ollenkaan	Erinomainen	Erinomainen	Kyllä, suurinpiirtein	Kyllä, suurinpiirtein	Kyllä	Kyllä	Kyllä	Kyllä	Ei	Ei	Ei	Harvoin	Ei koskaan	Ei koskaan	Harvoin	Usein	Usein	Aina	Aina	Aina	Aina	En osaa sanoa	Usein	Usein	Usein	Usein
45-54	Nainen	Opistoasteen tutkinto	2	0	Täysipäiväinen	Suomi	2006	Länsi-Uusimaa (ja HUS)	Ei	Erikoissairaanhoidossa (esim. sairaalan neurologian poliklinikka)			MS-tauti hoitotasapainossa, arjen toimintakyky alentunut			1	0	15	4	2	8	En ollenkaan	En ollenkaan	Hyvä	Hyvä	Ei	Ei	Kyllä	Ei	Kyllä	Ei	Kyllä	Kyllä	Ei	Joskus	Ei koskaan	En osaa sanoa	Usein	Joskus	En osaa sanoa	Ei koskaan	Ei koskaan	Ei koskaan	Ei koskaan	Ei koskaan	Ei koskaan	Ei koskaan	Ei koskaan	Ei koskaan
55-64	Nainen	Alempi korkeakoulututkinto	1 (Asun yksin)	0	Osa-aikainen	Ruotsi	2019	Länsi-Uusimaa (ja HUS)	Ei	Erikoissairaanhoidossa (esim. sairaalan neurologian poliklinikka)			MS-tauti hoitotasapainossa, arjen toimintakyky alentunut			1	0	0	1	1	0	En ollenkaan	En ollenkaan	Tyydyttävä	Erinomainen	Kyllä, suurinpiirtein	Kyllä, suurinpiirtein	Kyllä	Ei	Kyllä	Kyllä	Ei	Ei	Ei	Joskus	En osaa sanoa	En osaa sanoa	Joskus	Aina	Usein	Aina	Aina	Aina	Aina	Joskus	Aina	Aina	Harvoin	Ei koskaan
65-74	Nainen	Opistoasteen tutkinto	1 (Asun yksin)	0	Eläkkeellä (ml. työkyvyttömyyseläke)	Suomi	2006	Länsi-Uusimaa (ja HUS)	Kyllä	Yksityisellä poliklinikalla (esim. yksityinen neurologi)			MS-tauti hoitotasapainossa, arjen toimintakyky alentunut			11	2	5	2	4	5	En ollenkaan	En ollenkaan	Tyydyttävä	Hyvä	Kyllä, suurinpiirtein	Kyllä, varmasti	Ei	Ei	Ei	Kyllä	Ei	Kyllä	Kyllä	Ei koskaan	Ei koskaan	En osaa sanoa	Ei koskaan	Aina	Usein	Usein	Aina	Aina	Usein	Joskus	Aina	Aina	Usein	En osaa sanoa
75 tai vanhempi	Mies	Toinen aste (Lukio tai ammattikoulu)	2	0	Eläkkeellä (ml. työkyvyttömyyseläke)	Suomi	1981	Pirkanmaa	Kyllä	En osaa sanoa			MS-tauti hoitotasapainossa, arjen toimintakyky alentunut			30	0	20	30	1	20	En ollenkaan	En ollenkaan	Kohtalainen	Hyvä	Kyllä, suurinpiirtein	Kyllä, varmasti	Ei	Ei	Ei	Ei	Ei	Kyllä	Ei	En osaa sanoa	En osaa sanoa	En osaa sanoa	Usein	Aina	Usein	Usein	Aina	Aina	Aina	Usein	Aina	Usein	Usein	Usein
25-34	Nainen	Alempi korkeakoulututkinto	3	1	Osa-aikainen	Suomi	2021	Keski-Uusimaa (ja HUS)	Ei	Erikoissairaanhoidossa (esim. sairaalan neurologian poliklinikka)			MS-tauti hoitotasapainossa, arjen toimintakyky alentunut			4	2	2	1	4	2	En ollenkaan	En ollenkaan	Tyydyttävä	Hyvä	En osaa sanoa	Kyllä, suurinpiirtein	Kyllä	Ei	Kyllä	Kyllä	Kyllä	Kyllä	Kyllä	Ei koskaan	Ei koskaan	En osaa sanoa	Aina	Joskus	Harvoin	Usein	Usein	Aina	Joskus	Ei koskaan	Aina	Ei koskaan	Harvoin	Ei koskaan
55-64	Nainen	Alempi korkeakoulututkinto	1 (Asun yksin)	0	Eläkkeellä (ml. työkyvyttömyyseläke)	Suomi	2002	Pohjois-Savo	Ei	Erikoissairaanhoidossa (esim. sairaalan neurologian poliklinikka)			MS-tauti hoitotasapainossa, arjen toimintakyky alentunut			1	0	0	0	2	0	En ollenkaan	En ollenkaan	Kohtalainen	Kohtalainen	Ei	Kyllä, suurinpiirtein	Kyllä	Kyllä	Ei	En osaa sanoa	Kyllä	Kyllä	Ei	Ei koskaan	Ei koskaan	Ei koskaan	Usein	Harvoin	Ei koskaan	Harvoin	Harvoin	Harvoin	Joskus	Ei koskaan	Harvoin	Ei koskaan	Harvoin	Ei koskaan
75 tai vanhempi	Nainen	Joku muu	1 (Asun yksin)	0	Eläkkeellä (ml. työkyvyttömyyseläke)	Suomi	2020	Päijät-Häme	Kyllä	En osaa sanoa			MS-tauti hoitotasapainossa, arjen toimintakyky alentunut			3	0	5	0	1	5	En ollenkaan	En ollenkaan	Huono	Huono	En osaa sanoa	Kyllä, varmasti	Kyllä	Ei	Ei	En osaa sanoa	Kyllä	Kyllä	Ei	Ei koskaan	Ei koskaan	En osaa sanoa	Usein	En osaa sanoa	Joskus	En osaa sanoa	Joskus	En osaa sanoa	En osaa sanoa	En osaa sanoa	En osaa sanoa	Joskus	En osaa sanoa	Joskus
35-44	Nainen	Ylempi korkeakoulututkinto	2	1	Täysipäiväinen	Suomi	2012	Helsinki (ja HUS)	Ei	Erikoissairaanhoidossa (esim. sairaalan neurologian poliklinikka)			MS-tauti hoitotasapainossa, arjen toimintakyky alentunut			1	0	2	6	2	3	En ollenkaan	En ollenkaan	Tyydyttävä	Hyvä	Ei	Kyllä, suurinpiirtein	Kyllä	En osaa sanoa	Kyllä	Kyllä	Ei	Kyllä	Ei	Ei koskaan	Ei koskaan	En osaa sanoa	Joskus	Usein	Usein	Usein	Aina	Aina	Joskus	Ei koskaan	Usein	Joskus	Usein	Ei koskaan
55-64	Mies	Ylempi korkeakoulututkinto	2	0	Eläkkeellä (ml. työkyvyttömyyseläke)	Suomi	1996	Lappi	Ei	Erikoissairaanhoidossa (esim. sairaalan neurologian poliklinikka)					En halua sanoa	1	0	0	0	60	0	En ollenkaan	En ollenkaan	Kohtalainen	Erinomainen	Kyllä, suurinpiirtein	Kyllä, varmasti	Kyllä	Kyllä	Kyllä	Kyllä	Ei	En osaa sanoa	En osaa sanoa	Joskus	Ei koskaan	En osaa sanoa	Harvoin	Usein	En osaa sanoa	Usein	Aina	Aina	Usein	En osaa sanoa	Aina	Aina	Usein	Usein
55-64	Mies	Ylempi korkeakoulututkinto	1 (Asun yksin)	0	Täysipäiväinen	Suomi	2015	Varsinais-Suomi	Kyllä	Erikoissairaanhoidossa (esim. sairaalan neurologian poliklinikka)		MS-tauti hoitotasapainossa, ei juuri toimintakykyhaittaa				2	2	5	4	2	10	En ollenkaan	En ollenkaan	Hyvä	Hyvä	Kyllä, suurinpiirtein	Kyllä, suurinpiirtein	Kyllä	Kyllä	Kyllä	Kyllä	Ei	Ei	Ei	Ei koskaan	Ei koskaan	En osaa sanoa	Harvoin	Usein	Usein	Usein	Usein	Usein	Usein	Harvoin	Usein	Joskus	Usein	Usein
65-74	Mies	Opistoasteen tutkinto	2	0	Eläkkeellä (ml. työkyvyttömyyseläke)	Suomi	1997	Varsinais-Suomi	Kyllä	Erikoissairaanhoidossa (esim. sairaalan neurologian poliklinikka)			MS-tauti hoitotasapainossa, arjen toimintakyky alentunut			2	1	2	1	4	6	En ollenkaan	En ollenkaan	Kohtalainen	Hyvä	Kyllä, suurinpiirtein	Kyllä, varmasti	Kyllä	Kyllä	Kyllä	Kyllä	Ei	Kyllä	Ei	Ei koskaan	Ei koskaan	Ei koskaan	Joskus	Usein	Joskus	Usein	Usein	Usein	Usein	Joskus	Usein	Joskus	Usein	Usein
45-54	Nainen	Opistoasteen tutkinto	3	1	Eläkkeellä (ml. työkyvyttömyyseläke)	Suomi	2007	Pirkanmaa	Kyllä	Erikoissairaanhoidossa (esim. sairaalan neurologian poliklinikka)			MS-tauti hoitotasapainossa, arjen toimintakyky alentunut	MS-tauti ei hoitotasapainossa (esim. pahenemisvaihe)		1	3	10	4	3	5	En ollenkaan	En ollenkaan	Huono	Hyvä	Ei	Kyllä, suurinpiirtein	En osaa sanoa	Ei	Ei	Kyllä	Ei	Kyllä	Ei	Ei koskaan	Ei koskaan	En osaa sanoa	Aina	Usein	Harvoin	Usein	Joskus	Harvoin	Harvoin	Ei koskaan	Joskus	Joskus	Joskus	Ei koskaan
55-64	Mies	Peruskoulu	2	0	Eläkkeellä (ml. työkyvyttömyyseläke)	Suomi	2010	Keski-Uusimaa (ja HUS)	Ei	Perusterveydenhuollossa (esim. terveyskeskus tai - asema)		MS-tauti hoitotasapainossa, ei juuri toimintakykyhaittaa				0	0	0	0	0	0	En ollenkaan	En ollenkaan	Hyvä	Hyvä	Kyllä, suurinpiirtein	En osaa sanoa	Ei	Ei	Ei	En osaa sanoa	Ei	Ei	Ei	Ei koskaan	Ei koskaan	Ei koskaan	Ei koskaan	En osaa sanoa	En osaa sanoa	Aina	Aina	Aina	Aina	Aina	Aina	Aina	Aina	Aina
45-54	Nainen	Alempi korkeakoulututkinto	2	1	Täysipäiväinen	Suomi	2004	Helsinki (ja HUS)	Kyllä	Erikoissairaanhoidossa (esim. sairaalan neurologian poliklinikka)		MS-tauti hoitotasapainossa, ei juuri toimintakykyhaittaa				20	0	5	0	5	2	En ollenkaan	En ollenkaan	Tyydyttävä	Kohtalainen	Ei	Kyllä, suurinpiirtein	Kyllä	Kyllä	Kyllä	Kyllä	Kyllä	Kyllä	Ei	Harvoin	Ei koskaan	En osaa sanoa	Usein	Joskus	Joskus	Joskus	Joskus	Usein	Harvoin	Harvoin	Joskus	Harvoin	Joskus	Ei koskaan
55-64	Nainen	Alempi korkeakoulututkinto	1 (Asun yksin)	0	Eläkkeellä (ml. työkyvyttömyyseläke)	Suomi	2013	Helsinki (ja HUS)	Kyllä	Perusterveydenhuollossa (esim. terveyskeskus tai - asema)			MS-tauti hoitotasapainossa, arjen toimintakyky alentunut			3	0	1	0	6	2	Alle 7 päivää	Yli 7 päivää	Tyydyttävä	Kohtalainen	Kyllä, suurinpiirtein	Kyllä, suurinpiirtein	En osaa sanoa	En osaa sanoa	Kyllä	Kyllä	Ei	Kyllä	Kyllä	Harvoin	Harvoin	En osaa sanoa	Usein	Harvoin	Joskus	Joskus	Usein	Usein	Joskus	Ei koskaan	Harvoin	En osaa sanoa	En osaa sanoa	Harvoin
25-34	Nainen	Toinen aste (Lukio tai ammattikoulu)	3	1	Muu	Suomi	2011	Pirkanmaa	Ei	Erikoissairaanhoidossa (esim. sairaalan neurologian poliklinikka)			MS-tauti hoitotasapainossa, arjen toimintakyky alentunut			104	26	0	0	8	0	En ollenkaan	Yli 7 päivää	Hyvä	Hyvä	Kyllä, suurinpiirtein	Kyllä, suurinpiirtein	Ei	Ei	Kyllä	Kyllä	Ei	Ei	Kyllä	Ei koskaan	Ei koskaan	En osaa sanoa	Harvoin	Usein	Joskus	Joskus	Aina	Usein	Usein	Ei koskaan	Harvoin	Joskus	Joskus	Harvoin
35-44	Nainen	Ylempi korkeakoulututkinto	5 tai enemmän	3	Täysipäiväinen	Suomi	2017	Helsinki (ja HUS)	Kyllä	Erikoissairaanhoidossa (esim. sairaalan neurologian poliklinikka)		MS-tauti hoitotasapainossa, ei juuri toimintakykyhaittaa				1	0	6	1	1	5	En ollenkaan	En ollenkaan	Hyvä	Erinomainen	Ei	Kyllä, suurinpiirtein	Kyllä	Kyllä	Kyllä	Kyllä	Ei	Ei	Ei	En osaa sanoa	En osaa sanoa	En osaa sanoa	En osaa sanoa	Usein	Harvoin	Usein	Usein	Usein	Usein	En osaa sanoa	En osaa sanoa	Ei koskaan	En osaa sanoa	Ei koskaan
45-54	Nainen	Ylempi korkeakoulututkinto	3	0	Täysipäiväinen	Suomi	2011	Länsi-Uusimaa (ja HUS)	Ei	Erikoissairaanhoidossa (esim. sairaalan neurologian poliklinikka)		MS-tauti hoitotasapainossa, ei juuri toimintakykyhaittaa				12	0	5	0	2	6	En ollenkaan	En ollenkaan	Hyvä	Erinomainen	Kyllä, suurinpiirtein	Kyllä, suurinpiirtein	Kyllä	Kyllä	Kyllä	Kyllä	Ei	Ei	Ei	Harvoin	En osaa sanoa	En osaa sanoa	Harvoin	Usein	Usein	Usein	Usein	Usein	Usein	Joskus	Joskus	Joskus	Aina	Ei koskaan
55-64	Nainen	Ylempi korkeakoulututkinto	2	0	Osa-aikainen	Ruotsi	2008	Pohjanmaa	Ei	Erikoissairaanhoidossa (esim. sairaalan neurologian poliklinikka)		MS-tauti hoitotasapainossa, ei juuri toimintakykyhaittaa				2	2	0	0	2	1	En ollenkaan	En ollenkaan	Tyydyttävä	Hyvä	Ei	En osaa sanoa	Kyllä	Ei	Kyllä	Kyllä	Ei	Ei	Kyllä	Ei koskaan	Ei koskaan	En osaa sanoa	Joskus	Aina	Usein	Aina	Aina	Aina	Aina	Joskus	Usein	Usein	Usein	Joskus
55-64	Nainen	Opistoasteen tutkinto	2	0	Osa-aikainen	Suomi	2016	Pirkanmaa	Ei	Erikoissairaanhoidossa (esim. sairaalan neurologian poliklinikka)		MS-tauti hoitotasapainossa, ei juuri toimintakykyhaittaa				1	2	3	1	1	3	En ollenkaan	En ollenkaan	Tyydyttävä	Erinomainen	En osaa sanoa	En osaa sanoa	Kyllä	Kyllä	Kyllä	Kyllä	Ei	Ei	En osaa sanoa	Harvoin	Ei koskaan	Ei koskaan	Usein	Usein	Joskus	Usein	Aina	Aina	Usein	En osaa sanoa	Usein	Joskus	Usein	En osaa sanoa
35-44	Nainen	Alempi korkeakoulututkinto	2	0	Eläkkeellä (ml. työkyvyttömyyseläke)	Suomi	2017	Pirkanmaa	Kyllä	Erikoissairaanhoidossa (esim. sairaalan neurologian poliklinikka)			MS-tauti hoitotasapainossa, arjen toimintakyky alentunut			1	4	10	30	2	3	En ollenkaan	En ollenkaan	Kohtalainen	Hyvä	Kyllä, suurinpiirtein	Kyllä, varmasti	Kyllä	Kyllä	Kyllä	Kyllä	Ei	Kyllä	Kyllä	Ei koskaan	Ei koskaan	En osaa sanoa	Joskus	Usein	Usein	Usein	Usein	Usein	Usein	Usein	Usein	Usein	Usein	Usein
65-74	Nainen	Opistoasteen tutkinto	2	0	Eläkkeellä (ml. työkyvyttömyyseläke)	Suomi	2015	Pohjanmaa	Ei	Perusterveydenhuollossa (esim. terveyskeskus tai - asema)			MS-tauti hoitotasapainossa, arjen toimintakyky alentunut			0	1	0	0	0	0	En ollenkaan	En ollenkaan	Kohtalainen	Kohtalainen	Ei	Kyllä, suurinpiirtein	Kyllä	Ei	Kyllä	Ei	Kyllä	Ei	Ei	Ei koskaan	Ei koskaan	Ei koskaan	Ei koskaan	Aina	Ei koskaan	Aina	Aina	Joskus	Joskus	Harvoin	Ei koskaan	Ei koskaan	Ei koskaan	Ei koskaan
65-74	Nainen	Opistoasteen tutkinto	2	0	Eläkkeellä (ml. työkyvyttömyyseläke)	Suomi	2003	Varsinais-Suomi	Ei	Perusterveydenhuollossa (esim. terveyskeskus tai - asema)			MS-tauti hoitotasapainossa, arjen toimintakyky alentunut			0	0	3	0	0	3	En ollenkaan	En ollenkaan	Hyvä	Kohtalainen	En osaa sanoa	Kyllä, varmasti	Ei	Ei	Ei	Kyllä	Kyllä	Kyllä	Ei	Ei koskaan	Ei koskaan	Ei koskaan	Aina	Joskus	Harvoin	Aina	Joskus	En osaa sanoa	Ei koskaan	Ei koskaan	En osaa sanoa	Joskus	En osaa sanoa	Aina
35-44	Nainen	Alempi korkeakoulututkinto	4	2	Täysipäiväinen	Suomi	2007	Itä-Uusimaa (ja HUS)	Ei	Erikoissairaanhoidossa (esim. sairaalan neurologian poliklinikka)		MS-tauti hoitotasapainossa, ei juuri toimintakykyhaittaa				2	2	5	6	2	5	En ollenkaan	En ollenkaan	Hyvä	Erinomainen	Kyllä, suurinpiirtein	Kyllä, varmasti	Kyllä	Kyllä	Kyllä	Kyllä	Ei	Ei	Ei	Ei koskaan	Ei koskaan	En osaa sanoa	Ei koskaan	Aina	Ei koskaan	Aina	Aina	Aina	Aina	Ei koskaan	Aina	Ei koskaan	Aina	Ei koskaan
35-44	Nainen	Toinen aste (Lukio tai ammattikoulu)	2	0	Työtön	Suomi	2014	Helsinki (ja HUS)	Ei	Erikoissairaanhoidossa (esim. sairaalan neurologian poliklinikka)			MS-tauti hoitotasapainossa, arjen toimintakyky alentunut			40	0	3	0	5	5	En ollenkaan	En ollenkaan	Tyydyttävä	Hyvä	Kyllä, suurinpiirtein	Kyllä, varmasti	Ei	Kyllä	Kyllä	Kyllä	Ei	Kyllä	Ei	Ei koskaan	Ei koskaan	Aina	Harvoin	Usein	Usein	Aina	Joskus	Joskus	Aina	Ei koskaan	Joskus	Ei koskaan	En osaa sanoa	Ei koskaan
45-54	Nainen	Ylempi korkeakoulututkinto	2	0	Täysipäiväinen	Suomi	2003	Varsinais-Suomi	Kyllä	Erikoissairaanhoidossa (esim. sairaalan neurologian poliklinikka)		MS-tauti hoitotasapainossa, ei juuri toimintakykyhaittaa				1	0	7	0	1	5	En ollenkaan	En ollenkaan	Erinomainen	Hyvä	Kyllä, varmasti	Kyllä, varmasti	Kyllä	Kyllä	Ei	Kyllä	Ei	Ei	Ei	En osaa sanoa	Ei koskaan	En osaa sanoa	Usein	Joskus	Joskus	Usein	Aina	Aina	Aina	Joskus	Usein	Joskus	Usein	Ei koskaan
45-54	Nainen	Opistoasteen tutkinto	2	0	Täysipäiväinen	Suomi	2009	Pohjois-Savo	Kyllä	Erikoissairaanhoidossa (esim. sairaalan neurologian poliklinikka)		MS-tauti hoitotasapainossa, ei juuri toimintakykyhaittaa				1	1	6	3	1	3	En ollenkaan	En ollenkaan	Tyydyttävä	Erinomainen	Ei	Ei	Ei	Kyllä	Kyllä	Kyllä	Ei	Ei	Kyllä	Ei koskaan	En osaa sanoa	En osaa sanoa	Ei koskaan	Aina	Aina	Aina	Aina	Aina	Aina	Usein	Usein	Usein	Usein	En osaa sanoa
55-64	Nainen	Ylempi korkeakoulututkinto	2	0	Eläkkeellä (ml. työkyvyttömyyseläke)	Suomi	2014	Varsinais-Suomi	Kyllä	Erikoissairaanhoidossa (esim. sairaalan neurologian poliklinikka)			MS-tauti hoitotasapainossa, arjen toimintakyky alentunut			1	1	1	1	1	1	En ollenkaan	En ollenkaan	Kohtalainen	Kohtalainen	En osaa sanoa	Ei	Ei	Kyllä	Kyllä	Kyllä	Kyllä	Kyllä	Ei	Harvoin	Ei koskaan	En osaa sanoa	Usein	Joskus	Harvoin	Harvoin	Harvoin	Harvoin	Aina	Harvoin	Harvoin	Harvoin	Joskus	Harvoin
65-74	Nainen	Toinen aste (Lukio tai ammattikoulu)	2	0	Eläkkeellä (ml. työkyvyttömyyseläke)	Suomi	1998	Kanta-Häme	Kyllä	Perusterveydenhuollossa (esim. terveyskeskus tai - asema)		MS-tauti hoitotasapainossa, ei juuri toimintakykyhaittaa				1	0	50	10	3	10	En ollenkaan	En ollenkaan	Hyvä	Hyvä	En osaa sanoa	Kyllä, suurinpiirtein	Ei	Ei	Ei	Kyllä	Ei	Ei	Ei	Ei koskaan	Ei koskaan	En osaa sanoa	Ei koskaan	En osaa sanoa	Ei koskaan	Joskus	Joskus	Joskus	Aina	Ei koskaan	En osaa sanoa	Aina	En osaa sanoa	Ei koskaan
65-74	Nainen	Opistoasteen tutkinto	2	0	Eläkkeellä (ml. työkyvyttömyyseläke)	Suomi	2002	Pirkanmaa	Ei	Perusterveydenhuollossa (esim. terveyskeskus tai - asema)			MS-tauti hoitotasapainossa, arjen toimintakyky alentunut			40	0	2	5	40	4	En ollenkaan	En ollenkaan	Kohtalainen	Hyvä	Kyllä, suurinpiirtein	Kyllä, suurinpiirtein	Ei	Ei	Ei	En osaa sanoa	Ei	Kyllä	Kyllä	En osaa sanoa	En osaa sanoa	En osaa sanoa	En osaa sanoa	En osaa sanoa	Joskus	En osaa sanoa	En osaa sanoa	En osaa sanoa	En osaa sanoa	En osaa sanoa	En osaa sanoa	En osaa sanoa	En osaa sanoa	Joskus
45-54	Nainen	Opistoasteen tutkinto	1 (Asun yksin)	0	Muu	Suomi	2017	Kainuu	Kyllä	Erikoissairaanhoidossa (esim. sairaalan neurologian poliklinikka)			MS-tauti hoitotasapainossa, arjen toimintakyky alentunut			43	2	2	2	6	6	En ollenkaan	En ollenkaan	Kohtalainen	Hyvä	Kyllä, suurinpiirtein	Ei	Ei	Kyllä	Kyllä	Kyllä	Kyllä	Kyllä	Ei	Ei koskaan	Ei koskaan	En osaa sanoa	Joskus	Joskus	Usein	Usein	Usein	Usein	Usein	Usein	Usein	Usein	Joskus	Ei koskaan
55-64	Nainen	Opistoasteen tutkinto	2	0	Täysipäiväinen	Suomi	2003	Varsinais-Suomi	Kyllä	Erikoissairaanhoidossa (esim. sairaalan neurologian poliklinikka)			MS-tauti hoitotasapainossa, arjen toimintakyky alentunut	MS-tauti ei hoitotasapainossa (esim. pahenemisvaihe)		3	2	3	3	3	4	En ollenkaan	En ollenkaan	Tyydyttävä	Hyvä	En osaa sanoa	En osaa sanoa	Kyllä	Kyllä	Kyllä	Kyllä	Ei	Kyllä	Kyllä	Joskus	En osaa sanoa	En osaa sanoa	Usein	Usein	Joskus	Usein	Usein	Usein	Joskus	Usein	Usein	Joskus	Usein	Joskus
35-44	Nainen	Toinen aste (Lukio tai ammattikoulu)	3	1	Täysipäiväinen	Suomi	2014	Päijät-Häme	Ei	Perusterveydenhuollossa (esim. terveyskeskus tai - asema)			MS-tauti hoitotasapainossa, arjen toimintakyky alentunut			10	0	8	1	2	2	En ollenkaan	En ollenkaan	Tyydyttävä	Hyvä	Ei	Ei	Ei	Kyllä	Ei	Kyllä	Ei	Kyllä	Ei	Ei koskaan	Ei koskaan	En osaa sanoa	Joskus	Usein	En osaa sanoa	Usein	Usein	Joskus	Usein	Ei koskaan	Joskus	Ei koskaan	Joskus	Ei koskaan
65-74	Nainen	Toinen aste (Lukio tai ammattikoulu)	2	0	Eläkkeellä (ml. työkyvyttömyyseläke)	Suomi	2019	Varsinais-Suomi	Ei	Perusterveydenhuollossa (esim. terveyskeskus tai - asema)				MS-tauti ei hoitotasapainossa (esim. pahenemisvaihe)		0	0	10	0	1	3	En ollenkaan	Yli 7 päivää	Kohtalainen	Tyydyttävä	Ei	Ei	Ei	Ei	Kyllä	Kyllä	Kyllä	Kyllä	Kyllä	Ei koskaan	Ei koskaan	En osaa sanoa	Joskus	Harvoin	Usein	Harvoin	En osaa sanoa	En osaa sanoa	Usein	Joskus	Harvoin	Joskus	Joskus	Ei koskaan
45-54	Mies	Alempi korkeakoulututkinto	4	1	Osa-aikainen	Suomi	2004	Pohjois-Karjala	Kyllä	Erikoissairaanhoidossa (esim. sairaalan neurologian poliklinikka)		MS-tauti hoitotasapainossa, ei juuri toimintakykyhaittaa		MS-tauti ei hoitotasapainossa (esim. pahenemisvaihe)		3	0	20	5	4	6	En ollenkaan	En ollenkaan	Kohtalainen	Tyydyttävä	Ei	Ei	Kyllä	Ei	Ei	Kyllä	Kyllä	Kyllä	Ei	Joskus	En osaa sanoa	En osaa sanoa	Usein	Joskus	Harvoin	Usein	Usein	Usein	Usein	Harvoin	Harvoin	Joskus	Joskus	Ei koskaan
55-64	Mies	Alempi korkeakoulututkinto	1 (Asun yksin)	0	Eläkkeellä (ml. työkyvyttömyyseläke)	Suomi	1995	Pohjois-Karjala	Ei	Erikoissairaanhoidossa (esim. sairaalan neurologian poliklinikka)			MS-tauti hoitotasapainossa, arjen toimintakyky alentunut			0	2	2	1	2	3	En ollenkaan	Alle 7 päivää	Tyydyttävä	Erinomainen	Kyllä, varmasti	Kyllä, varmasti	Kyllä	Kyllä	Kyllä	Kyllä	Ei	Kyllä	Ei	Ei koskaan	Ei koskaan	Ei koskaan	Joskus	Aina	Joskus	Usein	Aina	Aina	Aina	Joskus	Aina	Usein	Usein	Joskus
55-64	Nainen	Ylempi korkeakoulututkinto	2	0	Osa-aikainen	Suomi	2002	Pirkanmaa	Kyllä	Perusterveydenhuollossa (esim. terveyskeskus tai - asema)			MS-tauti hoitotasapainossa, arjen toimintakyky alentunut			1	0	3	1	4	4	En ollenkaan	En ollenkaan	Hyvä	Hyvä	Kyllä, suurinpiirtein	Kyllä, suurinpiirtein	Kyllä	Kyllä	Ei	Kyllä	Ei	Ei	Ei	Joskus	Ei koskaan	En osaa sanoa	Joskus	Aina	Aina	Aina	Aina	Usein	Aina	Ei koskaan	Joskus	Joskus	Usein	Harvoin
65-74	Nainen	Alempi korkeakoulututkinto	1 (Asun yksin)	0	Eläkkeellä (ml. työkyvyttömyyseläke)	Suomi	2008	Pohjois-Savo	Kyllä	Perusterveydenhuollossa (esim. terveyskeskus tai - asema)			MS-tauti hoitotasapainossa, arjen toimintakyky alentunut			0	0	1	0	0	1	En ollenkaan	En ollenkaan	Tyydyttävä	Hyvä	Kyllä, suurinpiirtein	Kyllä, varmasti	Kyllä	Kyllä	Ei	Kyllä	Ei	Ei	Ei	En osaa sanoa	Ei koskaan	En osaa sanoa	Joskus	Aina	Joskus	Usein	Aina	Aina	Usein	Joskus	Usein	Usein	Usein	Ei koskaan
55-64	Nainen	Ylempi korkeakoulututkinto	2	0	Eläkkeellä (ml. työkyvyttömyyseläke)	Suomi	2007	Helsinki (ja HUS)	Kyllä	Perusterveydenhuollossa (esim. terveyskeskus tai - asema)					En halua sanoa	5	2	2	0	3	1	En ollenkaan	En ollenkaan	Tyydyttävä	Huono	Kyllä, suurinpiirtein	Kyllä, suurinpiirtein	Kyllä	Kyllä	Ei	En osaa sanoa	En osaa sanoa	Kyllä	En osaa sanoa	En osaa sanoa	En osaa sanoa	En osaa sanoa	En osaa sanoa	En osaa sanoa	En osaa sanoa	En osaa sanoa	En osaa sanoa	En osaa sanoa	En osaa sanoa	En osaa sanoa	En osaa sanoa	En osaa sanoa	En osaa sanoa	En osaa sanoa
35-44	Nainen	Alempi korkeakoulututkinto	3	1	Täysipäiväinen	Suomi	2019	Kanta-Häme	Kyllä	Erikoissairaanhoidossa (esim. sairaalan neurologian poliklinikka)		MS-tauti hoitotasapainossa, ei juuri toimintakykyhaittaa				1	0	5	2	1	5	En ollenkaan	En ollenkaan	Hyvä	Hyvä	Ei	Ei	En osaa sanoa	Ei	Ei	En osaa sanoa	Ei	Kyllä	Ei	Ei koskaan	Ei koskaan	En osaa sanoa	Harvoin	Joskus	Joskus	Usein	Joskus	Usein	Joskus	Harvoin	Usein	Joskus	Joskus	Ei koskaan
55-64	Nainen	Peruskoulu	2	0	Eläkkeellä (ml. työkyvyttömyyseläke)	Suomi	1987	Varsinais-Suomi	Ei	Erikoissairaanhoidossa (esim. sairaalan neurologian poliklinikka)			MS-tauti hoitotasapainossa, arjen toimintakyky alentunut			40	0	2	0	40	2	En ollenkaan	En ollenkaan	Kohtalainen	Hyvä	Kyllä, suurinpiirtein	Kyllä, suurinpiirtein	Kyllä	Kyllä	Kyllä	Kyllä	Ei	Ei	Ei	Joskus	Ei koskaan	Ei koskaan	Ei koskaan	Usein	Joskus	Usein	Usein	Usein	Usein	Joskus	Usein	Usein	Usein	Usein
55-64	Nainen	Opistoasteen tutkinto	2	0	Osa-aikainen	Suomi	2003	Kanta-Häme	Ei	Erikoissairaanhoidossa (esim. sairaalan neurologian poliklinikka)			MS-tauti hoitotasapainossa, arjen toimintakyky alentunut			10	2	3	1	3	1	En ollenkaan	Yli 7 päivää	Kohtalainen	Hyvä	En osaa sanoa	Kyllä, suurinpiirtein	En osaa sanoa	Kyllä	Kyllä	Kyllä	Ei	Ei	Kyllä	Ei koskaan	Ei koskaan	En osaa sanoa	Usein	Usein	Joskus	Usein	Aina	Usein	Usein	Harvoin	Joskus	Joskus	En osaa sanoa	Harvoin
65-74	Nainen	Opistoasteen tutkinto	2	0	Eläkkeellä (ml. työkyvyttömyyseläke)	Suomi	2005	Keski-Uusimaa (ja HUS)	Kyllä	Perusterveydenhuollossa (esim. terveyskeskus tai - asema)			MS-tauti hoitotasapainossa, arjen toimintakyky alentunut			0	0	1	2	0	3	En ollenkaan	En ollenkaan	Kohtalainen	Kohtalainen	En osaa sanoa	En osaa sanoa	Kyllä	Kyllä	Ei	En osaa sanoa	Ei	Kyllä	Ei	Ei koskaan	Ei koskaan	Ei koskaan	En osaa sanoa	En osaa sanoa	Ei koskaan	Ei koskaan	Ei koskaan	Ei koskaan	Ei koskaan	Ei koskaan	En osaa sanoa	Ei koskaan	Ei koskaan	Ei koskaan
65-74	Nainen	Peruskoulu	2	0	Eläkkeellä (ml. työkyvyttömyyseläke)	Suomi	2004	Satakunta	En osaa sanoa	Perusterveydenhuollossa (esim. terveyskeskus tai - asema)			MS-tauti hoitotasapainossa, arjen toimintakyky alentunut			1	0	2	3	1	3	En ollenkaan	En ollenkaan	Kohtalainen	Kohtalainen	En osaa sanoa	Kyllä, suurinpiirtein	Kyllä	Ei	Ei	Ei	Kyllä	Kyllä	Ei	Joskus	Ei koskaan	En osaa sanoa	Aina	Joskus	Harvoin	Joskus	Usein	Harvoin	Usein	Ei koskaan	Ei koskaan	Joskus	Ei koskaan	Ei koskaan
55-64	Nainen	Ylempi korkeakoulututkinto	2	0	Täysipäiväinen	Suomi	2024	Pohjois-Savo	Kyllä	Erikoissairaanhoidossa (esim. sairaalan neurologian poliklinikka)		MS-tauti hoitotasapainossa, ei juuri toimintakykyhaittaa				52	2	10	5	2	5	En ollenkaan	En ollenkaan	Tyydyttävä	Hyvä	Kyllä, suurinpiirtein	Kyllä, suurinpiirtein	Ei	Kyllä	Ei	Kyllä	Ei	Ei	En osaa sanoa	Ei koskaan	En osaa sanoa	En osaa sanoa	Usein	Usein	Usein	Usein	Usein	Usein	Usein	Harvoin	Usein	Joskus	Usein	Usein
55-64	Nainen	Alempi korkeakoulututkinto	2	0	Eläkkeellä (ml. työkyvyttömyyseläke)	Suomi	2017	Varsinais-Suomi	Kyllä	Erikoissairaanhoidossa (esim. sairaalan neurologian poliklinikka)			MS-tauti hoitotasapainossa, arjen toimintakyky alentunut			9	1	3	0	3	1	En ollenkaan	Yli 7 päivää	Tyydyttävä	Hyvä	Kyllä, suurinpiirtein	Kyllä, varmasti	Kyllä	Kyllä	Kyllä	Kyllä	Ei	Ei	Kyllä	Harvoin	Ei koskaan	En osaa sanoa	Ei koskaan	Aina	Harvoin	Usein	Aina	Aina	Aina	Joskus	Aina	Usein	Aina	Joskus
55-64	Nainen	Toinen aste (Lukio tai ammattikoulu)	2	0	Osa-aikainen	Suomi	2013	Pirkanmaa	Ei	Erikoissairaanhoidossa (esim. sairaalan neurologian poliklinikka)		MS-tauti hoitotasapainossa, ei juuri toimintakykyhaittaa				4	2	3	0	4	4	En ollenkaan	En ollenkaan	Kohtalainen	Hyvä	Kyllä, suurinpiirtein	Kyllä, suurinpiirtein	Kyllä	Kyllä	Kyllä	Kyllä	Ei	Kyllä	Kyllä	Ei koskaan	Ei koskaan	En osaa sanoa	Harvoin	Usein	Usein	Aina	Aina	Aina	Aina	Joskus	Aina	Aina	Aina	En osaa sanoa
45-54	Nainen	Peruskoulu	4	0	Eläkkeellä (ml. työkyvyttömyyseläke)	Suomi	2018	Päijät-Häme	Kyllä	Erikoissairaanhoidossa (esim. sairaalan neurologian poliklinikka)			MS-tauti hoitotasapainossa, arjen toimintakyky alentunut			1	5	2	4	4	4	En ollenkaan	En ollenkaan	Tyydyttävä	Hyvä	En osaa sanoa	En osaa sanoa	Kyllä	Kyllä	Kyllä	Kyllä	Ei	Kyllä	Ei	Ei koskaan	Ei koskaan	En osaa sanoa	Joskus	Joskus	Harvoin	Usein	Aina	Usein	Usein	Ei koskaan	Usein	Ei koskaan	En osaa sanoa	Ei koskaan
45-54	En halua sanoa	Ylempi korkeakoulututkinto	1 (Asun yksin)	0	Täysipäiväinen	En halua sanoa	2006	Pirkanmaa	Kyllä	Perusterveydenhuollossa (esim. terveyskeskus tai - asema)			MS-tauti hoitotasapainossa, arjen toimintakyky alentunut			1	0	5	3	1	7	En ollenkaan	En ollenkaan	Kohtalainen	Huono	Ei	Kyllä, varmasti	Ei	Ei	Ei	Kyllä	Kyllä	Ei	Ei	Ei koskaan	Ei koskaan	En osaa sanoa	Aina	Harvoin	Joskus	Usein	Joskus	Joskus	Joskus	Ei koskaan	Joskus	Joskus	Joskus	Ei koskaan
55-64	Nainen	Opistoasteen tutkinto	2	0	Osa-aikainen	Ruotsi	1999	Varsinais-Suomi	Ei	Erikoissairaanhoidossa (esim. sairaalan neurologian poliklinikka)		MS-tauti hoitotasapainossa, ei juuri toimintakykyhaittaa				0	0	2	0	1	2	En ollenkaan	En ollenkaan	Tyydyttävä	Hyvä	En osaa sanoa	Kyllä, suurinpiirtein	Kyllä	Kyllä	Kyllä	Kyllä	Ei	Ei	En osaa sanoa	Ei koskaan	Ei koskaan	En osaa sanoa	Harvoin	En osaa sanoa	Usein	Usein	Usein	Usein	Aina	Usein	Usein	Usein	Usein	Harvoin
65-74	Nainen	Opistoasteen tutkinto	2	0	Eläkkeellä (ml. työkyvyttömyyseläke)	Suomi	2018	Varsinais-Suomi	Kyllä	Erikoissairaanhoidossa (esim. sairaalan neurologian poliklinikka)			MS-tauti hoitotasapainossa, arjen toimintakyky alentunut			45	0	6	0	3	4	Alle 7 päivää	Yli 7 päivää	Huono	Hyvä	Kyllä, suurinpiirtein	Ei	Kyllä	Ei	Kyllä	Kyllä	En osaa sanoa	Ei	Ei	Harvoin	Ei koskaan	En osaa sanoa	Harvoin	Aina	Joskus	Usein	Usein	Usein	Aina	Ei koskaan	Harvoin	Joskus	Harvoin	Joskus
55-64	Nainen	Alempi korkeakoulututkinto	2	0	Osa-aikainen	Suomi	1996	Kanta-Häme	Kyllä	Erikoissairaanhoidossa (esim. sairaalan neurologian poliklinikka)		MS-tauti hoitotasapainossa, ei juuri toimintakykyhaittaa				1	0	3	1	1	2	En ollenkaan	En ollenkaan	Hyvä	Hyvä	Kyllä, suurinpiirtein	Kyllä, suurinpiirtein	En osaa sanoa	Ei	Kyllä	Kyllä	Ei	Kyllä	Ei	Ei koskaan	Ei koskaan	En osaa sanoa	Harvoin	Usein	Joskus	Usein	Usein	Usein	Usein	Joskus	Usein	Usein	Usein	Joskus
45-54	Nainen	Ylempi korkeakoulututkinto	2	0	Osa-aikainen	Suomi	2001	Satakunta	Kyllä	En osaa sanoa			MS-tauti hoitotasapainossa, arjen toimintakyky alentunut			0	0	2	2	2	2	En ollenkaan	En ollenkaan	Tyydyttävä	Huono	En osaa sanoa	En osaa sanoa	Ei	Ei	Ei	Ei	En osaa sanoa	Kyllä	Ei	En osaa sanoa	En osaa sanoa	En osaa sanoa	En osaa sanoa	En osaa sanoa	En osaa sanoa	En osaa sanoa	En osaa sanoa	En osaa sanoa	En osaa sanoa	En osaa sanoa	En osaa sanoa	En osaa sanoa	En osaa sanoa	En osaa sanoa
45-54	Nainen	Opistoasteen tutkinto	2	0	Eläkkeellä (ml. työkyvyttömyyseläke)	Suomi	2003	Etelä-Pohjanmaa	Kyllä	Erikoissairaanhoidossa (esim. sairaalan neurologian poliklinikka)		MS-tauti hoitotasapainossa, ei juuri toimintakykyhaittaa				1	0	2	0	0	2	En ollenkaan	En ollenkaan	Tyydyttävä	Hyvä	Kyllä, suurinpiirtein	Kyllä, varmasti	Kyllä	Kyllä	Ei	En osaa sanoa	Ei	Kyllä	Ei	Harvoin	Harvoin	Usein	Joskus	Usein	Usein	Usein	Usein	Joskus	Usein	Joskus	Joskus	Joskus	Usein	Joskus
55-64	Nainen	Ylempi korkeakoulututkinto	1 (Asun yksin)	0	Täysipäiväinen	Suomi	2021	Pirkanmaa	Ei	Perusterveydenhuollossa (esim. terveyskeskus tai - asema)			MS-tauti hoitotasapainossa, arjen toimintakyky alentunut			1	0	2	0	1	2	En ollenkaan	En ollenkaan	Tyydyttävä	Hyvä	Kyllä, suurinpiirtein	Kyllä, suurinpiirtein	Kyllä	En osaa sanoa	Kyllä	Kyllä	Ei	Ei	En osaa sanoa	Ei koskaan	Ei koskaan	En osaa sanoa	Joskus	Aina	Usein	Aina	Usein	Usein	Usein	Harvoin	En osaa sanoa	Joskus	En osaa sanoa	En osaa sanoa
55-64	Nainen	Toinen aste (Lukio tai ammattikoulu)	2	0	Eläkkeellä (ml. työkyvyttömyyseläke)	Suomi	2003	Etelä-Pohjanmaa	Ei	Erikoissairaanhoidossa (esim. sairaalan neurologian poliklinikka)			MS-tauti hoitotasapainossa, arjen toimintakyky alentunut			1	1	3	2	10	3	En ollenkaan	En ollenkaan	Tyydyttävä	Kohtalainen	Ei	Kyllä, suurinpiirtein	Kyllä	Kyllä	Ei	Kyllä	Ei	Kyllä	Ei	Joskus	Ei koskaan	Ei koskaan	Joskus	Joskus	Ei koskaan	Aina	Joskus	Usein	Joskus	Ei koskaan	En osaa sanoa	En osaa sanoa	En osaa sanoa	Ei koskaan
75 tai vanhempi	Nainen	Toinen aste (Lukio tai ammattikoulu)	1 (Asun yksin)	0	Eläkkeellä (ml. työkyvyttömyyseläke)	Suomi	1994	Kymenlaakso	Kyllä	Erikoissairaanhoidossa (esim. sairaalan neurologian poliklinikka)			MS-tauti hoitotasapainossa, arjen toimintakyky alentunut	MS-tauti ei hoitotasapainossa (esim. pahenemisvaihe)		2	2	2	1	2	3	En ollenkaan	Alle 7 päivää	Kohtalainen	Tyydyttävä	Kyllä, suurinpiirtein	Kyllä, varmasti	Kyllä	Kyllä	Ei	Kyllä	Ei	Kyllä	Kyllä	Ei koskaan	Ei koskaan	En osaa sanoa	Joskus	Aina	Joskus	Aina	Aina	Aina	Usein	Joskus	Usein	Joskus	Usein	Usein
35-44	Nainen	Peruskoulu	3	0	Täysipäiväinen	Suomi	2013	Pirkanmaa	Kyllä	Erikoissairaanhoidossa (esim. sairaalan neurologian poliklinikka)			MS-tauti hoitotasapainossa, arjen toimintakyky alentunut			5	10	2	10	2	3	En ollenkaan	En ollenkaan	Kohtalainen	Huono	Ei	Ei	Kyllä	Ei	Ei	Ei	Kyllä	Kyllä	Ei	Ei koskaan	Ei koskaan	En osaa sanoa	Aina	Joskus	Joskus	Joskus	Harvoin	Joskus	Harvoin	Ei koskaan	Ei koskaan	Ei koskaan	Ei koskaan	Ei koskaan
25-34	Nainen	Alempi korkeakoulututkinto	2	0	Opiskelija	Suomi	2023	Pohjois-Pohjanmaa	Kyllä	Perusterveydenhuollossa (esim. terveyskeskus tai - asema)	Uusi MS-tauti diagnoosi	MS-tauti hoitotasapainossa, ei juuri toimintakykyhaittaa				2	1	3	3	1	3	En ollenkaan	En ollenkaan	Hyvä	Tyydyttävä	Kyllä, suurinpiirtein	Kyllä, suurinpiirtein	Kyllä	Ei	Kyllä	En osaa sanoa	Kyllä	Kyllä	Ei	Ei koskaan	Ei koskaan	En osaa sanoa	Joskus	Usein	Harvoin	Usein	Usein	Usein	Joskus	Ei koskaan	Harvoin	Ei koskaan	Ei koskaan	Ei koskaan
55-64	Nainen	Toinen aste (Lukio tai ammattikoulu)	2	0	Eläkkeellä (ml. työkyvyttömyyseläke)	Suomi	2011	Kainuu	Kyllä	Erikoissairaanhoidossa (esim. sairaalan neurologian poliklinikka)		MS-tauti hoitotasapainossa, ei juuri toimintakykyhaittaa				1	0	2	1	1	3	En ollenkaan	En ollenkaan	Tyydyttävä	Tyydyttävä	Ei	Ei	Kyllä	Ei	Ei	En osaa sanoa	En osaa sanoa	En osaa sanoa	Ei	Ei koskaan	Ei koskaan	En osaa sanoa	Joskus	Joskus	Ei koskaan	Harvoin	Joskus	Harvoin	Ei koskaan	Ei koskaan	Harvoin	Ei koskaan	Harvoin	Ei koskaan
55-64	Mies	Alempi korkeakoulututkinto	1 (Asun yksin)	0	Eläkkeellä (ml. työkyvyttömyyseläke)	Suomi	2005	Helsinki (ja HUS)	Ei	Erikoissairaanhoidossa (esim. sairaalan neurologian poliklinikka)			MS-tauti hoitotasapainossa, arjen toimintakyky alentunut			4	0	1	0	3	1	En ollenkaan	Yli 7 päivää	Kohtalainen	Erinomainen	Kyllä, varmasti	Kyllä, varmasti	Kyllä	Kyllä	Kyllä	Kyllä	Ei	Kyllä	Kyllä	Ei koskaan	Ei koskaan	En osaa sanoa	Ei koskaan	Aina	Joskus	Aina	Aina	Aina	Aina	Joskus	Aina	Joskus	Usein	Joskus
35-44	Nainen	Alempi korkeakoulututkinto	1 (Asun yksin)	0	Eläkkeellä (ml. työkyvyttömyyseläke)	Suomi	2007	Helsinki (ja HUS)	Ei	Erikoissairaanhoidossa (esim. sairaalan neurologian poliklinikka)			MS-tauti hoitotasapainossa, arjen toimintakyky alentunut			2	0	10	6	4	7	En ollenkaan	En ollenkaan	Tyydyttävä	Hyvä	Kyllä, suurinpiirtein	Kyllä, suurinpiirtein	Kyllä	Kyllä	Kyllä	Kyllä	Kyllä	Ei	Ei	Ei koskaan	Ei koskaan	En osaa sanoa	Aina	Usein	Usein	Usein	Usein	Aina	Joskus	Usein	Aina	Aina	Usein	Harvoin
65-74	Nainen	Opistoasteen tutkinto	2	0	Eläkkeellä (ml. työkyvyttömyyseläke)	Suomi	2011	Pohjois-Savo	Ei	En osaa sanoa			MS-tauti hoitotasapainossa, arjen toimintakyky alentunut			3	1	1	1	3	2	En ollenkaan	En ollenkaan	Kohtalainen	Tyydyttävä	Ei	Ei	Ei	Ei	Kyllä	Kyllä	Ei	Ei	Ei	Harvoin	Ei koskaan	En osaa sanoa	Harvoin	Usein	Usein	Aina	Aina	Aina	Aina	Joskus	Usein	Usein	Joskus	Joskus
45-54	Nainen	Opistoasteen tutkinto	2	0	Osa-aikainen	Suomi	2010	Pirkanmaa	Kyllä	Perusterveydenhuollossa (esim. terveyskeskus tai - asema)			MS-tauti hoitotasapainossa, arjen toimintakyky alentunut			45	0	5	0	2	2	En ollenkaan	Yli 7 päivää	Tyydyttävä	Hyvä	Kyllä, suurinpiirtein	Kyllä, suurinpiirtein	Kyllä	Kyllä	Ei	Kyllä	Ei	Ei	Ei	Ei koskaan	Ei koskaan	En osaa sanoa	Joskus	Aina	Usein	Usein	Usein	Usein	Aina	Joskus	Usein	Usein	Usein	Joskus
55-64	Nainen	Toinen aste (Lukio tai ammattikoulu)	2	0	Eläkkeellä (ml. työkyvyttömyyseläke)	Suomi	2016	Keski-Suomi	Ei	Erikoissairaanhoidossa (esim. sairaalan neurologian poliklinikka)		MS-tauti hoitotasapainossa, ei juuri toimintakykyhaittaa				3	0	1	0	2	1	En ollenkaan	En ollenkaan	Tyydyttävä	Hyvä	En osaa sanoa	Kyllä, varmasti	Ei	Kyllä	Ei	Kyllä	Ei	Ei	Ei	Harvoin	Ei koskaan	Aina	Joskus	Aina	Harvoin	Aina	Aina	Aina	Aina	Aina	Aina	Aina	Usein	Joskus
55-64	Mies	Opistoasteen tutkinto	2	0	Eläkkeellä (ml. työkyvyttömyyseläke)	Suomi	3010	Helsinki (ja HUS)	Ei	Erikoissairaanhoidossa (esim. sairaalan neurologian poliklinikka)			MS-tauti hoitotasapainossa, arjen toimintakyky alentunut	MS-tauti ei hoitotasapainossa (esim. pahenemisvaihe)		81	0	2	0	3	3	En ollenkaan	Yli 7 päivää	Kohtalainen	Tyydyttävä	En osaa sanoa	Ei	Kyllä	Kyllä	Ei	Kyllä	Kyllä	Kyllä	Ei	Harvoin	Ei koskaan	Usein	Aina	Usein	Ei koskaan	Harvoin	Usein	Joskus	Usein	Ei koskaan	Joskus	Harvoin	Joskus	Joskus
35-44	Nainen	Toinen aste (Lukio tai ammattikoulu)	3	1	Muu	Suomi	2015	Pirkanmaa	Ei	Erikoissairaanhoidossa (esim. sairaalan neurologian poliklinikka)			MS-tauti hoitotasapainossa, arjen toimintakyky alentunut	MS-tauti ei hoitotasapainossa (esim. pahenemisvaihe)		3	1	2	0	2	2	Alle 7 päivää	En ollenkaan	Tyydyttävä	Tyydyttävä	En osaa sanoa	Kyllä, suurinpiirtein	Ei	En osaa sanoa	Kyllä	Kyllä	Kyllä	Kyllä	Ei	Ei koskaan	Ei koskaan	En osaa sanoa	Usein	Usein	Joskus	Usein	Joskus	Joskus	Harvoin	Harvoin	Joskus	Ei koskaan	Joskus	Ei koskaan
55-64	Nainen	Ylempi korkeakoulututkinto	1 (Asun yksin)	0	Täysipäiväinen	Suomi	2009	Pirkanmaa	Kyllä	Perusterveydenhuollossa (esim. terveyskeskus tai - asema)			MS-tauti hoitotasapainossa, arjen toimintakyky alentunut			45	1	1	2	3	3	En ollenkaan	En ollenkaan	Tyydyttävä	Tyydyttävä	Kyllä, suurinpiirtein	Kyllä, suurinpiirtein	Kyllä	En osaa sanoa	Kyllä	En osaa sanoa	Kyllä	Ei	Ei	Ei koskaan	Ei koskaan	En osaa sanoa	Joskus	Usein	En osaa sanoa	Usein	Usein	Usein	Usein	En osaa sanoa	En osaa sanoa	Joskus	Usein	Joskus
45-54	Nainen	Opistoasteen tutkinto	2	0	Eläkkeellä (ml. työkyvyttömyyseläke)	Suomi	2013	Etelä-Karjala	Kyllä	Erikoissairaanhoidossa (esim. sairaalan neurologian poliklinikka)		MS-tauti hoitotasapainossa, ei juuri toimintakykyhaittaa				0	1	2	2	0	2	En ollenkaan	En ollenkaan	Hyvä	Hyvä	Kyllä, suurinpiirtein	Kyllä, suurinpiirtein	Ei	Ei	Ei	Kyllä	Ei	Ei	Ei	Harvoin	Ei koskaan	Ei koskaan	Ei koskaan	Aina	Aina	Aina	Aina	Aina	Aina	Usein	Aina	Aina	Aina	Ei koskaan
65-74	Nainen	Alempi korkeakoulututkinto	1 (Asun yksin)	0	Eläkkeellä (ml. työkyvyttömyyseläke)	Suomi	1997	Vantaa-Kerava (ja HUS)	Ei	Perusterveydenhuollossa (esim. terveyskeskus tai - asema)				MS-tauti ei hoitotasapainossa (esim. pahenemisvaihe)		40	5	1	5	2	5	En ollenkaan	Yli 7 päivää	Kohtalainen	Kohtalainen	Ei	Kyllä, suurinpiirtein	En osaa sanoa	En osaa sanoa	Kyllä	Ei	En osaa sanoa	Kyllä	Ei	En osaa sanoa	En osaa sanoa	En osaa sanoa	En osaa sanoa	En osaa sanoa	En osaa sanoa	En osaa sanoa	En osaa sanoa	En osaa sanoa	En osaa sanoa	En osaa sanoa	En osaa sanoa	En osaa sanoa	En osaa sanoa	En osaa sanoa
45-54	Mies	Toinen aste (Lukio tai ammattikoulu)	1 (Asun yksin)	0	Eläkkeellä (ml. työkyvyttömyyseläke)	Suomi	2011	Varsinais-Suomi	Kyllä	Erikoissairaanhoidossa (esim. sairaalan neurologian poliklinikka)			MS-tauti hoitotasapainossa, arjen toimintakyky alentunut			1	1	4	3	1	4	En ollenkaan	En ollenkaan	Kohtalainen	Tyydyttävä	Ei	Kyllä, suurinpiirtein	Kyllä	Kyllä	Kyllä	En osaa sanoa	Kyllä	Kyllä	En osaa sanoa	Harvoin	Ei koskaan	En osaa sanoa	Usein	Harvoin	Harvoin	Usein	Joskus	Joskus	Joskus	Joskus	Usein	Joskus	En osaa sanoa	Harvoin
45-54	Nainen	Toinen aste (Lukio tai ammattikoulu)	2	0	Osa-aikainen	Suomi	2007	Keski-Suomi	Kyllä	Erikoissairaanhoidossa (esim. sairaalan neurologian poliklinikka)			MS-tauti hoitotasapainossa, arjen toimintakyky alentunut			1	1	0	0	2	0	En ollenkaan	En ollenkaan	Kohtalainen	Hyvä	Kyllä, suurinpiirtein	Kyllä, suurinpiirtein	Ei	Ei	Kyllä	Kyllä	Kyllä	Kyllä	Kyllä	Ei koskaan	En osaa sanoa	En osaa sanoa	Aina	Usein	Usein	Usein	Usein	Usein	Joskus	Harvoin	Harvoin	Harvoin	Joskus	Ei koskaan
25-34	Nainen	Alempi korkeakoulututkinto	3	1	Täysipäiväinen	Suomi	2021	Satakunta	Ei	Erikoissairaanhoidossa (esim. sairaalan neurologian poliklinikka)		MS-tauti hoitotasapainossa, ei juuri toimintakykyhaittaa				1	0	0	0	1	1	En ollenkaan	En ollenkaan	Hyvä	Erinomainen	En osaa sanoa	Kyllä, varmasti	Kyllä	Kyllä	Kyllä	Kyllä	Ei	Ei	Kyllä	Ei koskaan	Ei koskaan	En osaa sanoa	Usein	Aina	Aina	Aina	Aina	Aina	Aina	Usein	Aina	Usein	Aina	Ei koskaan
55-64	Nainen	Opistoasteen tutkinto	2	0	Eläkkeellä (ml. työkyvyttömyyseläke)	Suomi	2001	Satakunta	Kyllä	Erikoissairaanhoidossa (esim. sairaalan neurologian poliklinikka)		MS-tauti hoitotasapainossa, ei juuri toimintakykyhaittaa				1	0	1	0	1	1	En ollenkaan	En ollenkaan	Hyvä	Hyvä	Kyllä, suurinpiirtein	Kyllä, suurinpiirtein	Ei	Ei	Kyllä	Kyllä	Ei	Ei	Ei	Ei koskaan	Ei koskaan	En osaa sanoa	Ei koskaan	Aina	Usein	Aina	Usein	Usein	Aina	Ei koskaan	En osaa sanoa	Ei koskaan	Joskus	En osaa sanoa
45-54	Nainen	Toinen aste (Lukio tai ammattikoulu)	3	1	Eläkkeellä (ml. työkyvyttömyyseläke)	Suomi	2023	Kanta-Häme	Ei	Perusterveydenhuollossa (esim. terveyskeskus tai - asema)	Uusi MS-tauti diagnoosi					1	0	1	0	1	1	En ollenkaan	Alle 7 päivää	Tyydyttävä	Huono	En osaa sanoa	En osaa sanoa	Kyllä	Ei	Ei	Ei	Kyllä	Kyllä	Ei	Ei koskaan	Ei koskaan	Ei koskaan	Usein	Usein	Ei koskaan	Harvoin	Harvoin	Harvoin	Harvoin	Ei koskaan	Ei koskaan	Harvoin	Ei koskaan	Ei koskaan
25-34	Nainen	Ylempi korkeakoulututkinto	3	1	Osa-aikainen	Suomi	2017	Helsinki (ja HUS)	Ei	Erikoissairaanhoidossa (esim. sairaalan neurologian poliklinikka)			MS-tauti hoitotasapainossa, arjen toimintakyky alentunut			14	0	6	1	2	4	En ollenkaan	En ollenkaan	Tyydyttävä	Hyvä	Kyllä, suurinpiirtein	Kyllä, varmasti	Kyllä	Ei	Ei	Kyllä	Ei	Ei	Kyllä	Ei koskaan	Ei koskaan	En osaa sanoa	Harvoin	Usein	Joskus	Aina	Usein	Aina	Joskus	Usein	Joskus	Harvoin	Joskus	Joskus
75 tai vanhempi	Nainen	Ylempi korkeakoulututkinto	1 (Asun yksin)	0	Eläkkeellä (ml. työkyvyttömyyseläke)	Ruotsi	1994	Helsinki (ja HUS)	Ei	Yksityisellä poliklinikalla (esim. yksityinen neurologi)			MS-tauti hoitotasapainossa, arjen toimintakyky alentunut			40	4	2	2	10? Robottijaksolla laaksossa 2/krt 3krt/viikko	4	En ollenkaan	Yli 7 päivää	Hyvä	Erinomainen	Kyllä, suurinpiirtein	Kyllä, varmasti	Ei	Ei	Ei	Kyllä	Ei	Kyllä	Ei	En osaa sanoa	Ei koskaan	En osaa sanoa	Joskus	Aina	Usein	Aina	Aina	Aina	Aina	Usein	Usein	Usein	Usein	Joskus
45-54	Mies	Opistoasteen tutkinto	3	1	Eläkkeellä (ml. työkyvyttömyyseläke)	Suomi	2006	Pohjois-Karjala	Ei	Perusterveydenhuollossa (esim. terveyskeskus tai - asema)				MS-tauti ei hoitotasapainossa (esim. pahenemisvaihe)		10	0	1	1	4	1	En ollenkaan	En ollenkaan	Huono	Tyydyttävä	En osaa sanoa	En osaa sanoa	Kyllä	Ei	Kyllä	En osaa sanoa	Kyllä	Kyllä	En osaa sanoa	Ei koskaan	Ei koskaan	Ei koskaan	Harvoin	Usein	Joskus	Usein	Usein	Usein	Ei koskaan	Harvoin	Joskus	Harvoin	Joskus	Harvoin
65-74	Nainen	Opistoasteen tutkinto	1 (Asun yksin)	0	Eläkkeellä (ml. työkyvyttömyyseläke)	Suomi	2012	Varsinais-Suomi	Ei	Perusterveydenhuollossa (esim. terveyskeskus tai - asema)			MS-tauti hoitotasapainossa, arjen toimintakyky alentunut			1	0	3	0	1	2	En ollenkaan	En ollenkaan	Tyydyttävä	Hyvä	En osaa sanoa	Kyllä, varmasti	Kyllä	Ei	Ei	Kyllä	Ei	Ei	Ei	Ei koskaan	Ei koskaan	Ei koskaan	Joskus	Usein	Usein	Usein	Usein	Usein	Usein	Aina	Usein	Usein	Joskus	Usein
55-64	Nainen	Toinen aste (Lukio tai ammattikoulu)	3	0	Osa-aikainen	Suomi	2005	Helsinki (ja HUS)	Ei	Erikoissairaanhoidossa (esim. sairaalan neurologian poliklinikka)			MS-tauti hoitotasapainossa, arjen toimintakyky alentunut			1	0	2	0	1	2	En ollenkaan	En ollenkaan	Tyydyttävä	Hyvä	Kyllä, suurinpiirtein	Kyllä, varmasti	Kyllä	Ei	Ei	Kyllä	Ei	Ei	Ei	Ei koskaan	Ei koskaan	En osaa sanoa	Harvoin	Usein	Ei koskaan	Usein	Usein	Usein	Aina	Ei koskaan	Usein	Ei koskaan	En osaa sanoa	Ei koskaan
35-44	Nainen	Ylempi korkeakoulututkinto	3	1	Muu	Suomi	2000	Länsi-Uusimaa (ja HUS)	Ei	Erikoissairaanhoidossa (esim. sairaalan neurologian poliklinikka)		MS-tauti hoitotasapainossa, ei juuri toimintakykyhaittaa				1	2	32	22	1	8	En ollenkaan	En ollenkaan	Hyvä	Hyvä	En osaa sanoa	En osaa sanoa	Kyllä	Kyllä	Kyllä	Kyllä	Ei	Ei	Kyllä	Ei koskaan	Ei koskaan	En osaa sanoa	Aina	Aina	Aina	Aina	Usein	Aina	Aina	Aina	Aina	Aina	Aina	En osaa sanoa
55-64	Nainen	Alempi korkeakoulututkinto	2	0	Eläkkeellä (ml. työkyvyttömyyseläke)	Suomi	1996	Varsinais-Suomi	Kyllä	Erikoissairaanhoidossa (esim. sairaalan neurologian poliklinikka)				MS-tauti ei hoitotasapainossa (esim. pahenemisvaihe)		55	0	4	0	2	2	En ollenkaan	En ollenkaan	Huono	Hyvä	Ei	Kyllä, varmasti	Kyllä	Kyllä	Kyllä	Kyllä	Ei	Kyllä	Ei	Ei koskaan	Ei koskaan	En osaa sanoa	Usein	Harvoin	En osaa sanoa	Aina	Aina	Aina	Aina	Joskus	Joskus	Ei koskaan	Aina	Ei koskaan
65-74	Mies	Ylempi korkeakoulututkinto	2	0	Eläkkeellä (ml. työkyvyttömyyseläke)	Suomi	2019	Helsinki (ja HUS)	En osaa sanoa	Erikoissairaanhoidossa (esim. sairaalan neurologian poliklinikka)			MS-tauti hoitotasapainossa, arjen toimintakyky alentunut			1	0	1	40	2	2	Alle 7 päivää	En ollenkaan	Hyvä	Hyvä	En osaa sanoa	Ei	Ei	Kyllä	Ei	Kyllä	Kyllä	Kyllä	Ei	Ei koskaan	Ei koskaan	En osaa sanoa	Usein	Joskus	Joskus	Usein	Joskus	Usein	Usein	En osaa sanoa	Joskus	Joskus	En osaa sanoa	Harvoin
35-44	Mies	Tutkijakoulutus	4	2	Täysipäiväinen	Suomi	2020	Länsi-Uusimaa (ja HUS)	Ei	Erikoissairaanhoidossa (esim. sairaalan neurologian poliklinikka)		MS-tauti hoitotasapainossa, ei juuri toimintakykyhaittaa				1	0	1	1	2	2	En ollenkaan	En ollenkaan	Tyydyttävä	Tyydyttävä	En osaa sanoa	Kyllä, suurinpiirtein	Kyllä	Kyllä	Kyllä	Kyllä	Ei	Kyllä	Ei	Ei koskaan	Ei koskaan	En osaa sanoa	Usein	Harvoin	Harvoin	Usein	Usein	Usein	Usein	Harvoin	Joskus	Harvoin	Joskus	Harvoin
45-54	Nainen	Toinen aste (Lukio tai ammattikoulu)	4	0	Täysipäiväinen	Suomi	2019	Etelä-Pohjanmaa	Ei	Perusterveydenhuollossa (esim. terveyskeskus tai - asema)			MS-tauti hoitotasapainossa, arjen toimintakyky alentunut			1	0	4	0	2	3	En ollenkaan	En ollenkaan	Kohtalainen	Tyydyttävä	Ei	Ei	Kyllä	Kyllä	Ei	Ei	En osaa sanoa	Kyllä	En osaa sanoa	Joskus	Ei koskaan	Ei koskaan	Joskus	Usein	Joskus	Joskus	Usein	Joskus	Joskus	Harvoin	En osaa sanoa	Ei koskaan	En osaa sanoa	Ei koskaan
65-74	Mies	Ylempi korkeakoulututkinto	2	0	Eläkkeellä (ml. työkyvyttömyyseläke)	Suomi	2012	Helsinki (ja HUS)	Kyllä	Perusterveydenhuollossa (esim. terveyskeskus tai - asema)				MS-tauti ei hoitotasapainossa (esim. pahenemisvaihe)		7	0	3	0	6	6	Alle 7 päivää	En ollenkaan	Kohtalainen	Kohtalainen	En osaa sanoa	Kyllä, varmasti	Kyllä	Kyllä	Kyllä	Ei	Kyllä	Kyllä	Ei	Ei koskaan	Ei koskaan	En osaa sanoa	Joskus	Usein	Usein	Usein	Aina	Usein	Usein	Usein	Usein	Joskus	Ei koskaan	Joskus
35-44	Nainen	Alempi korkeakoulututkinto	3	1	Täysipäiväinen	Suomi	2020	Pohjois-Karjala	Kyllä	Erikoissairaanhoidossa (esim. sairaalan neurologian poliklinikka)		MS-tauti hoitotasapainossa, ei juuri toimintakykyhaittaa				3	3	1	0	En muista	4	En ollenkaan	En ollenkaan	Tyydyttävä	Hyvä	Ei	Ei	Kyllä	En osaa sanoa	Kyllä	Kyllä	Kyllä	Kyllä	En osaa sanoa	Joskus	Ei koskaan	En osaa sanoa	Aina	Harvoin	Ei koskaan	Harvoin	Harvoin	Harvoin	Harvoin	Harvoin	Ei koskaan	Harvoin	Ei koskaan	En osaa sanoa
55-64	Nainen	Toinen aste (Lukio tai ammattikoulu)	2	0	Eläkkeellä (ml. työkyvyttömyyseläke)	Suomi	2019	Etelä-Pohjanmaa	En osaa sanoa	Erikoissairaanhoidossa (esim. sairaalan neurologian poliklinikka)			MS-tauti hoitotasapainossa, arjen toimintakyky alentunut	MS-tauti ei hoitotasapainossa (esim. pahenemisvaihe)		80	0	6	10	1	8	En ollenkaan	En ollenkaan	Kohtalainen	Kohtalainen	Ei	En osaa sanoa	Kyllä	Kyllä	Ei	En osaa sanoa	En osaa sanoa	Kyllä	Ei	Ei koskaan	Ei koskaan	Ei koskaan	Aina	Joskus	Joskus	Joskus	Joskus	Joskus	Harvoin	Ei koskaan	Joskus	Harvoin	Joskus	Ei koskaan
25-34	Nainen	Toinen aste (Lukio tai ammattikoulu)	2	0	Osa-aikainen	Suomi	2013	Pohjois-Pohjanmaa	Ei	Erikoissairaanhoidossa (esim. sairaalan neurologian poliklinikka)			MS-tauti hoitotasapainossa, arjen toimintakyky alentunut			1	2	3	4	3	3	En ollenkaan	En ollenkaan	Tyydyttävä	Kohtalainen	Ei	Ei	Kyllä	Kyllä	Kyllä	Kyllä	En osaa sanoa	Kyllä	Ei	Ei koskaan	Ei koskaan	En osaa sanoa	Aina	Joskus	Joskus	Joskus	Joskus	Harvoin	Joskus	Ei koskaan	Harvoin	Ei koskaan	Joskus	Ei koskaan
65-74	Nainen	Alempi korkeakoulututkinto	1 (Asun yksin)	0	Eläkkeellä (ml. työkyvyttömyyseläke)	Ruotsi	1983	Helsinki (ja HUS)	Kyllä	Yksityisellä poliklinikalla (esim. yksityinen neurologi)			MS-tauti hoitotasapainossa, arjen toimintakyky alentunut			3	1	0	1	1	1	En ollenkaan	En ollenkaan	Kohtalainen	Kohtalainen	Ei	Kyllä, suurinpiirtein	Kyllä	Ei	Ei	Kyllä	Ei	En osaa sanoa	Ei	En osaa sanoa	En osaa sanoa	En osaa sanoa	Harvoin	Aina	Harvoin	Usein	Aina	Aina	Aina	En osaa sanoa	Usein	Aina	En osaa sanoa	En osaa sanoa
55-64	Nainen	Opistoasteen tutkinto	1 (Asun yksin)	0	Osa-aikainen	Suomi	2014	Varsinais-Suomi	Ei	Erikoissairaanhoidossa (esim. sairaalan neurologian poliklinikka)			MS-tauti hoitotasapainossa, arjen toimintakyky alentunut			40	0	0	1	4	1	En ollenkaan	En ollenkaan	Tyydyttävä	Hyvä	En osaa sanoa	Ei	Kyllä	Kyllä	Ei	En osaa sanoa	Kyllä	Ei	Ei	Harvoin	Ei koskaan	En osaa sanoa	Usein	Usein	Harvoin	Joskus	Joskus	Usein	Joskus	Ei koskaan	Joskus	Joskus	Joskus	Joskus
65-74	Mies	Alempi korkeakoulututkinto	2	0	Eläkkeellä (ml. työkyvyttömyyseläke)	Suomi	1995	Pohjois-Savo	Ei	Perusterveydenhuollossa (esim. terveyskeskus tai - asema)			MS-tauti hoitotasapainossa, arjen toimintakyky alentunut			0	0	25	0	1	0	En ollenkaan	Yli 7 päivää	Tyydyttävä	Tyydyttävä	Ei	Ei	Kyllä	Ei	Ei	Ei	En osaa sanoa	Kyllä	Ei	En osaa sanoa	Ei koskaan	Ei koskaan	Aina	Joskus	Joskus	Harvoin	Harvoin	Harvoin	Harvoin	Ei koskaan	Joskus	Joskus	Harvoin	Harvoin
25-34	Muu	Toinen aste (Lukio tai ammattikoulu)	2	0	Muu	Suomi	2022	Keski-Suomi	Ei	Erikoissairaanhoidossa (esim. sairaalan neurologian poliklinikka)		MS-tauti hoitotasapainossa, ei juuri toimintakykyhaittaa	MS-tauti hoitotasapainossa, arjen toimintakyky alentunut	MS-tauti ei hoitotasapainossa (esim. pahenemisvaihe)		50	15	4	1	25	4	Yli 7 päivää	Yli 7 päivää	Huono	Hyvä	Kyllä, suurinpiirtein	Kyllä, suurinpiirtein	Kyllä	Kyllä	Kyllä	Kyllä	Ei	Kyllä	Kyllä	Ei koskaan	Ei koskaan	En osaa sanoa	Joskus	Aina	Usein	Usein	Aina	Aina	Aina	Joskus	Usein	Aina	Joskus	Usein
45-54	Mies	Ylempi korkeakoulututkinto	1 (Asun yksin)	0	Täysipäiväinen	Suomi	1996	Pirkanmaa	Kyllä	En osaa sanoa		MS-tauti hoitotasapainossa, ei juuri toimintakykyhaittaa				0	0	5	0	0	2	En ollenkaan	En ollenkaan	Hyvä	En osaa sanoa	Ei	Kyllä, suurinpiirtein	Kyllä	Ei	Ei	Ei	Ei	Ei	Ei	En osaa sanoa	En osaa sanoa	En osaa sanoa	En osaa sanoa	En osaa sanoa	En osaa sanoa	En osaa sanoa	En osaa sanoa	En osaa sanoa	En osaa sanoa	En osaa sanoa	En osaa sanoa	En osaa sanoa	En osaa sanoa	En osaa sanoa
45-54	Mies	Tutkijakoulutus	4	2	Täysipäiväinen	Suomi	2021	Satakunta	Kyllä	Erikoissairaanhoidossa (esim. sairaalan neurologian poliklinikka)		MS-tauti hoitotasapainossa, ei juuri toimintakykyhaittaa				2	2	0	0	4	0	En ollenkaan	En ollenkaan	Tyydyttävä	Hyvä	Ei	Kyllä, suurinpiirtein	Kyllä	Kyllä	Kyllä	Kyllä	Ei	Kyllä	Ei	Ei koskaan	Ei koskaan	Ei koskaan	Joskus	Usein	Harvoin	Usein	Joskus	Usein	Joskus	Ei koskaan	Ei koskaan	Harvoin	Usein	Harvoin
45-54	Nainen	Tutkijakoulutus	4	1	Täysipäiväinen	Suomi	2020	Länsi-Uusimaa (ja HUS)	Ei	Erikoissairaanhoidossa (esim. sairaalan neurologian poliklinikka)			MS-tauti hoitotasapainossa, arjen toimintakyky alentunut			60	1	12	0	10	10	En ollenkaan	Yli 7 päivää	Hyvä	Hyvä	Kyllä, suurinpiirtein	Kyllä, suurinpiirtein	Kyllä	Kyllä	Kyllä	Kyllä	Ei	Ei	Ei	Ei koskaan	Ei koskaan	En osaa sanoa	Joskus	Aina	Joskus	Aina	Aina	Usein	Aina	Ei koskaan	Usein	Ei koskaan	Joskus	Ei koskaan
65-74	Nainen	Opistoasteen tutkinto	2	0	Eläkkeellä (ml. työkyvyttömyyseläke)	Suomi	1998	Pohjois-Pohjanmaa	Kyllä	Erikoissairaanhoidossa (esim. sairaalan neurologian poliklinikka)			MS-tauti hoitotasapainossa, arjen toimintakyky alentunut			0	0	2	1	0	3	En ollenkaan	En ollenkaan	Kohtalainen	Tyydyttävä	En osaa sanoa	Ei	Kyllä	Kyllä	Ei	Kyllä	Ei	Ei	Ei	Joskus	Ei koskaan	En osaa sanoa	Usein	Usein	Usein	Usein	Usein	Usein	Usein	Harvoin	Usein	Joskus	Joskus	Harvoin
65-74	Nainen	Opistoasteen tutkinto	2	0	Eläkkeellä (ml. työkyvyttömyyseläke)	Suomi	2023	Pirkanmaa	Kyllä	Perusterveydenhuollossa (esim. terveyskeskus tai - asema)			MS-tauti hoitotasapainossa, arjen toimintakyky alentunut			2	1	2	0	2	2	En ollenkaan	En ollenkaan	Tyydyttävä	En osaa sanoa	Ei	Kyllä, varmasti	Ei	Kyllä	Kyllä	Kyllä	Ei	Ei	Ei	Ei koskaan	Ei koskaan	En osaa sanoa	Harvoin	Aina	Harvoin	Aina	Aina	Aina	Aina	Ei koskaan	Aina	Ei koskaan	Joskus	Ei koskaan
55-64	Nainen	Opistoasteen tutkinto	2	0	Eläkkeellä (ml. työkyvyttömyyseläke)	Suomi	1999	Etelä-Pohjanmaa	Kyllä	Erikoissairaanhoidossa (esim. sairaalan neurologian poliklinikka)			MS-tauti hoitotasapainossa, arjen toimintakyky alentunut			160	2	3	3	7	3	En ollenkaan	En ollenkaan	Hyvä	Hyvä	Kyllä, suurinpiirtein	Kyllä, suurinpiirtein	Kyllä	Kyllä	Ei	Kyllä	Ei	Ei	Ei	Ei koskaan	Harvoin	Ei koskaan	Harvoin	Aina	Usein	Usein	Usein	Usein	Usein	Harvoin	Usein	Usein	Usein	Harvoin
35-44	Nainen	Alempi korkeakoulututkinto	5 tai enemmän	4 tai enemmän	Täysipäiväinen	Suomi	2022	Etelä-Karjala	Ei	Erikoissairaanhoidossa (esim. sairaalan neurologian poliklinikka)	Uusi MS-tauti diagnoosi					3	3	2	1	2	2	En ollenkaan	En ollenkaan	Hyvä	Hyvä	Ei	Kyllä, varmasti	Kyllä	Kyllä	Kyllä	Kyllä	En osaa sanoa	Kyllä	En osaa sanoa	Ei koskaan	Harvoin	Aina	Joskus	Aina	Joskus	Joskus	Joskus	Usein	Usein	Joskus	Usein	Usein	Aina	Joskus
35-44	Nainen	Toinen aste (Lukio tai ammattikoulu)	1 (Asun yksin)	0	Eläkkeellä (ml. työkyvyttömyyseläke)	Suomi	2010	Etelä-Pohjanmaa	Kyllä	Erikoissairaanhoidossa (esim. sairaalan neurologian poliklinikka)		MS-tauti hoitotasapainossa, ei juuri toimintakykyhaittaa				46	0	4	2	5	5	En ollenkaan	Yli 7 päivää	Tyydyttävä	Hyvä	En osaa sanoa	Kyllä, suurinpiirtein	Kyllä	Ei	Ei	Kyllä	Ei	Ei	Kyllä	Ei koskaan	Ei koskaan	En osaa sanoa	Ei koskaan	Aina	Usein	Usein	Usein	Usein	Usein	Harvoin	Joskus	Joskus	Joskus	Harvoin
35-44	Nainen	Toinen aste (Lukio tai ammattikoulu)	4	1	Eläkkeellä (ml. työkyvyttömyyseläke)	Suomi	2004	Pohjois-Karjala	Ei	Erikoissairaanhoidossa (esim. sairaalan neurologian poliklinikka)			MS-tauti hoitotasapainossa, arjen toimintakyky alentunut			2	0	2	2	3	0	En ollenkaan	En ollenkaan	Kohtalainen	Tyydyttävä	En osaa sanoa	Kyllä, suurinpiirtein	Kyllä	Kyllä	En osaa sanoa	Kyllä	En osaa sanoa	Kyllä	Ei	Harvoin	Ei koskaan	En osaa sanoa	Joskus	Usein	Aina	Usein	Aina	Aina	Aina	Joskus	Usein	Usein	Usein	Aina
45-54	Nainen	Alempi korkeakoulututkinto	3	1	Eläkkeellä (ml. työkyvyttömyyseläke)	Suomi	2003	Keski-Suomi	Kyllä	Erikoissairaanhoidossa (esim. sairaalan neurologian poliklinikka)			MS-tauti hoitotasapainossa, arjen toimintakyky alentunut			30	2	5	2	5	4	En ollenkaan	Yli 7 päivää	Tyydyttävä	Tyydyttävä	Ei	Ei	Kyllä	Ei	Kyllä	Kyllä	Kyllä	Kyllä	Kyllä	Harvoin	Ei koskaan	En osaa sanoa	Usein	Joskus	Joskus	Joskus	Joskus	Harvoin	Usein	Ei koskaan	Joskus	Ei koskaan	Usein	Joskus
45-54	Nainen	Ylempi korkeakoulututkinto	1 (Asun yksin)	0	Täysipäiväinen	Suomi	1993	Satakunta	Kyllä	Yksityisellä poliklinikalla (esim. yksityinen neurologi)		MS-tauti hoitotasapainossa, ei juuri toimintakykyhaittaa				1	0	1	0	1	1	En ollenkaan	En ollenkaan	Hyvä	Hyvä	Kyllä, suurinpiirtein	Kyllä, suurinpiirtein	Kyllä	Kyllä	Ei	Kyllä	Ei	Ei	Kyllä	Ei koskaan	Ei koskaan	En osaa sanoa	Ei koskaan	Aina	Aina	Aina	Usein	Aina	Usein	Ei koskaan	Usein	Ei koskaan	Aina	Ei koskaan
35-44	Mies	Toinen aste (Lukio tai ammattikoulu)	4	2	Täysipäiväinen	Suomi	2021	Etelä-Karjala	Ei	Erikoissairaanhoidossa (esim. sairaalan neurologian poliklinikka)			MS-tauti hoitotasapainossa, arjen toimintakyky alentunut			1	0	3	0	2	2	En ollenkaan	En ollenkaan	Tyydyttävä	Hyvä	Kyllä, suurinpiirtein	Kyllä, suurinpiirtein	Ei	Ei	En osaa sanoa	En osaa sanoa	Ei	Kyllä	Ei	Ei koskaan	Ei koskaan	En osaa sanoa	Joskus	Usein	Harvoin	Usein	Usein	Usein	Usein	Ei koskaan	En osaa sanoa	Harvoin	Usein	Harvoin
35-44	Nainen	Ylempi korkeakoulututkinto	2	0	Täysipäiväinen	Suomi	2014	Pirkanmaa	Kyllä	Erikoissairaanhoidossa (esim. sairaalan neurologian poliklinikka)		MS-tauti hoitotasapainossa, ei juuri toimintakykyhaittaa				1	2	4	4	1	7	En ollenkaan	En ollenkaan	Hyvä	Hyvä	Kyllä, suurinpiirtein	Kyllä, varmasti	Kyllä	Kyllä	Kyllä	Kyllä	Ei	Ei	Ei	Ei koskaan	Ei koskaan	En osaa sanoa	Harvoin	Aina	Joskus	Usein	Usein	Usein	Aina	Joskus	Usein	Harvoin	Usein	Ei koskaan
25-34	Mies	Alempi korkeakoulututkinto	1 (Asun yksin)	0	Eläkkeellä (ml. työkyvyttömyyseläke)	Suomi	2023	Itä-Uusimaa (ja HUS)	Kyllä	Erikoissairaanhoidossa (esim. sairaalan neurologian poliklinikka)	Uusi MS-tauti diagnoosi		MS-tauti hoitotasapainossa, arjen toimintakyky alentunut			4	2	11	6	8	0	Alle 7 päivää	En ollenkaan	Kohtalainen	Tyydyttävä	Ei	Ei	Ei	Ei	Ei	Ei	Kyllä	Kyllä	Ei	Harvoin	Ei koskaan	En osaa sanoa	Usein	Harvoin	Harvoin	Joskus	Harvoin	Joskus	Harvoin	Joskus	Joskus	Harvoin	Harvoin	Ei koskaan
35-44	Nainen	Ylempi korkeakoulututkinto	4	2	Osa-aikainen	Suomi	2021	Pohjois-Savo	En osaa sanoa	Erikoissairaanhoidossa (esim. sairaalan neurologian poliklinikka)		MS-tauti hoitotasapainossa, ei juuri toimintakykyhaittaa				5	3	5	3	5	5	En ollenkaan	En ollenkaan	Hyvä	Hyvä	Ei	Kyllä, suurinpiirtein	En osaa sanoa	Kyllä	Kyllä	Kyllä	Ei	Kyllä	Kyllä	Ei koskaan	Harvoin	Aina	Harvoin	Usein	Aina	Usein	Usein	Usein	Usein	En osaa sanoa	Usein	Usein	Usein	En osaa sanoa
45-54	Nainen	Alempi korkeakoulututkinto	2	0	Eläkkeellä (ml. työkyvyttömyyseläke)	Suomi	1999	Helsinki (ja HUS)	Kyllä	Erikoissairaanhoidossa (esim. sairaalan neurologian poliklinikka)			MS-tauti hoitotasapainossa, arjen toimintakyky alentunut			2	1	10	4	1	2	En ollenkaan	En ollenkaan	Tyydyttävä	Hyvä	Kyllä, suurinpiirtein	Kyllä, suurinpiirtein	Kyllä	Kyllä	Kyllä	Kyllä	Ei	Kyllä	Kyllä	Ei koskaan	Ei koskaan	En osaa sanoa	Joskus	Joskus	Aina	Usein	Usein	Aina	Aina	Usein	Aina	Aina	Usein	En osaa sanoa
35-44	Nainen	Toinen aste (Lukio tai ammattikoulu)	1 (Asun yksin)	0	Täysipäiväinen	Suomi	2019	Vantaa-Kerava (ja HUS)	En osaa sanoa	Erikoissairaanhoidossa (esim. sairaalan neurologian poliklinikka)			MS-tauti hoitotasapainossa, arjen toimintakyky alentunut			1	0	1	0	1	1	En ollenkaan	En ollenkaan	Tyydyttävä	Hyvä	En osaa sanoa	En osaa sanoa	Kyllä	Kyllä	Ei	Kyllä	Ei	Ei	Ei	Harvoin	Ei koskaan	En osaa sanoa	Harvoin	Usein	Usein	Joskus	Joskus	Usein	Joskus	Harvoin	Usein	Joskus	Usein	Harvoin
65-74	Nainen	Ylempi korkeakoulututkinto	2	0	Eläkkeellä (ml. työkyvyttömyyseläke)	Suomi	1985	Helsinki (ja HUS)	Kyllä	Yksityisellä poliklinikalla (esim. yksityinen neurologi)			MS-tauti hoitotasapainossa, arjen toimintakyky alentunut			2	2	2	2	3	2	En ollenkaan	Yli 7 päivää	Kohtalainen	Erinomainen	Kyllä, suurinpiirtein	Kyllä, suurinpiirtein	Kyllä	Kyllä	Kyllä	Kyllä	Ei	Kyllä	Kyllä	Harvoin	Ei koskaan	Aina	Harvoin	Aina	Joskus	Aina	Aina	Aina	Aina	Aina	Aina	Aina	Aina	Aina
35-44	Nainen	Alempi korkeakoulututkinto	1 (Asun yksin)	0	Muu	Suomi	2022	Keski-Uusimaa (ja HUS)	Kyllä	Erikoissairaanhoidossa (esim. sairaalan neurologian poliklinikka)				MS-tauti ei hoitotasapainossa (esim. pahenemisvaihe)		20	3	5	0	16	1	Yli 7 päivää	Yli 7 päivää	Hyvä	Hyvä	Kyllä, varmasti	Kyllä, suurinpiirtein	Kyllä	Kyllä	Kyllä	Kyllä	Ei	Kyllä	Kyllä	Harvoin	Ei koskaan	En osaa sanoa	Joskus	Aina	Aina	Aina	Aina	Aina	Aina	Usein	Aina	Aina	Aina	Aina
45-54	Nainen	Alempi korkeakoulututkinto	3	0	Täysipäiväinen	Suomi	2009	Pirkanmaa	Ei	Erikoissairaanhoidossa (esim. sairaalan neurologian poliklinikka)		MS-tauti hoitotasapainossa, ei juuri toimintakykyhaittaa				0	2	0	0	0	0	En ollenkaan	En ollenkaan	Erinomainen	Erinomainen	En osaa sanoa	Kyllä, varmasti	Ei	Kyllä	Ei	Kyllä	Ei	Ei	Ei	Harvoin	Ei koskaan	En osaa sanoa	Ei koskaan	Aina	Joskus	Aina	Aina	Aina	Aina	Aina	Aina	Aina	Aina	Harvoin
45-54	Nainen	Alempi korkeakoulututkinto	4	2	Täysipäiväinen	Suomi	2015	Varsinais-Suomi	Kyllä	Erikoissairaanhoidossa (esim. sairaalan neurologian poliklinikka)			MS-tauti hoitotasapainossa, arjen toimintakyky alentunut			1	0	6	3	3	3	En ollenkaan	En ollenkaan	Tyydyttävä	Hyvä	En osaa sanoa	Kyllä, suurinpiirtein	Kyllä	Ei	Kyllä	Kyllä	Ei	Kyllä	Kyllä	Ei koskaan	Joskus	Usein	Usein	Joskus	Usein	Usein	Joskus	Joskus	Usein	Harvoin	Joskus	Joskus	Joskus	Ei koskaan
55-64	Mies	Opistoasteen tutkinto	1 (Asun yksin)	0	Täysipäiväinen	Suomi	2006	Vantaa-Kerava (ja HUS)	Kyllä	Erikoissairaanhoidossa (esim. sairaalan neurologian poliklinikka)			MS-tauti hoitotasapainossa, arjen toimintakyky alentunut			4	0	1	3	2	3	En ollenkaan	Yli 7 päivää	Tyydyttävä	Tyydyttävä	Kyllä, suurinpiirtein	Kyllä, suurinpiirtein	Kyllä	Kyllä	Kyllä	En osaa sanoa	Kyllä	Kyllä	Ei	En osaa sanoa	En osaa sanoa	En osaa sanoa	Usein	Joskus	Joskus	Usein	Usein	Usein	Harvoin	Harvoin	Usein	Joskus	Usein	Harvoin
55-64	Nainen	Toinen aste (Lukio tai ammattikoulu)	2	0	Täysipäiväinen	Suomi	1996	Helsinki (ja HUS)	Kyllä	Erikoissairaanhoidossa (esim. sairaalan neurologian poliklinikka)		MS-tauti hoitotasapainossa, ei juuri toimintakykyhaittaa	MS-tauti hoitotasapainossa, arjen toimintakyky alentunut			1	0	9	3	1	5	En ollenkaan	En ollenkaan	Hyvä	Hyvä	En osaa sanoa	Kyllä, varmasti	Kyllä	Ei	Kyllä	Kyllä	Ei	Ei	Ei	Harvoin	En osaa sanoa	Aina	Usein	Usein	Usein	Usein	Usein	Joskus	Aina	Ei koskaan	En osaa sanoa	Joskus	Aina	Ei koskaan
45-54	Nainen	Toinen aste (Lukio tai ammattikoulu)	3	0	Osa-aikainen	Suomi	2014	Vantaa-Kerava (ja HUS)	Ei	Erikoissairaanhoidossa (esim. sairaalan neurologian poliklinikka)		MS-tauti hoitotasapainossa, ei juuri toimintakykyhaittaa	MS-tauti hoitotasapainossa, arjen toimintakyky alentunut			4	2	7	5	4	6	En ollenkaan	En ollenkaan	Tyydyttävä	Hyvä	En osaa sanoa	Kyllä, varmasti	Kyllä	Kyllä	Kyllä	Kyllä	En osaa sanoa	En osaa sanoa	Ei	En osaa sanoa	En osaa sanoa	En osaa sanoa	Joskus	Usein	Joskus	Usein	Usein	Joskus	Usein	Harvoin	Usein	Joskus	Usein	Joskus
55-64	Nainen	Ylempi korkeakoulututkinto	2	0	Täysipäiväinen	Suomi	2019	Pirkanmaa	Kyllä	Erikoissairaanhoidossa (esim. sairaalan neurologian poliklinikka)			MS-tauti hoitotasapainossa, arjen toimintakyky alentunut			2	0	10	1	2	4	En ollenkaan	Alle 7 päivää	Kohtalainen	Hyvä	Kyllä, suurinpiirtein	Kyllä, suurinpiirtein	Kyllä	Kyllä	Kyllä	Kyllä	Ei	Kyllä	Kyllä	Ei koskaan	Ei koskaan	Ei koskaan	Harvoin	Aina	Aina	Aina	Aina	Aina	Aina	Joskus	Aina	Joskus	Usein	Harvoin
45-54	Nainen	Ylempi korkeakoulututkinto	2	0	Täysipäiväinen	Suomi	2021	Vantaa-Kerava (ja HUS)	Kyllä	Erikoissairaanhoidossa (esim. sairaalan neurologian poliklinikka)		MS-tauti hoitotasapainossa, ei juuri toimintakykyhaittaa	MS-tauti hoitotasapainossa, arjen toimintakyky alentunut			2	0	4	0	1	4	En ollenkaan	En ollenkaan	Tyydyttävä	Tyydyttävä	Kyllä, suurinpiirtein	Kyllä, varmasti	Kyllä	En osaa sanoa	Kyllä	Kyllä	Kyllä	Ei	Ei	Ei koskaan	Ei koskaan	En osaa sanoa	Joskus	Usein	Harvoin	Joskus	Usein	Joskus	Aina	Ei koskaan	En osaa sanoa	En osaa sanoa	En osaa sanoa	Ei koskaan
55-64	Mies	Alempi korkeakoulututkinto	2	0	Eläkkeellä (ml. työkyvyttömyyseläke)	Suomi	2021	Kanta-Häme	Ei	Erikoissairaanhoidossa (esim. sairaalan neurologian poliklinikka)			MS-tauti hoitotasapainossa, arjen toimintakyky alentunut			40	2	4	1	4	4	En ollenkaan	En ollenkaan	Kohtalainen	Erinomainen	En osaa sanoa	En osaa sanoa	Kyllä	Kyllä	Kyllä	Kyllä	Kyllä	Kyllä	Kyllä	En osaa sanoa	En osaa sanoa	En osaa sanoa	Joskus	Aina	Aina	Aina	Aina	Aina	Usein	Usein	Aina	Aina	Aina	Aina
35-44	Nainen	Opistoasteen tutkinto	1 (Asun yksin)	0	Työtön	Suomi	2021	Pohjois-Pohjanmaa	Ei	En osaa sanoa		MS-tauti hoitotasapainossa, ei juuri toimintakykyhaittaa				10	0	2	0	3	2	En ollenkaan	En ollenkaan	Hyvä	Hyvä	En osaa sanoa	En osaa sanoa	Kyllä	Ei	Ei	En osaa sanoa	Ei	Kyllä	Ei	Ei koskaan	Ei koskaan	En osaa sanoa	Ei koskaan	Harvoin	Joskus	Usein	Joskus	Joskus	Harvoin	Harvoin	Joskus	Harvoin	Harvoin	Ei koskaan
55-64	Nainen	Toinen aste (Lukio tai ammattikoulu)	2	0	Eläkkeellä (ml. työkyvyttömyyseläke)	Suomi	1990	Lappi	Ei	Perusterveydenhuollossa (esim. terveyskeskus tai - asema)			MS-tauti hoitotasapainossa, arjen toimintakyky alentunut			65	0	3	0	6	3	En ollenkaan	Yli 7 päivää	Hyvä	Hyvä	En osaa sanoa	Kyllä, varmasti	Ei	Kyllä	En osaa sanoa	Kyllä	Kyllä	En osaa sanoa	Kyllä	Harvoin	Harvoin	Aina	Harvoin	Usein	Aina	Usein	Usein	Usein	Usein	En osaa sanoa	Usein	Usein	Usein	Joskus
35-44	Nainen	Alempi korkeakoulututkinto	4	2	Osa-aikainen	Suomi	2010	Varsinais-Suomi	Ei	Perusterveydenhuollossa (esim. terveyskeskus tai - asema)		MS-tauti hoitotasapainossa, ei juuri toimintakykyhaittaa				1	1	2	1	0	2	Alle 7 päivää	En ollenkaan	Tyydyttävä	Kohtalainen	Ei	Ei	Ei	Ei	Ei	Ei	Kyllä	Ei	Ei	Ei koskaan	Ei koskaan	Ei koskaan	Usein	Joskus	Harvoin	Usein	Usein	Usein	Harvoin	Joskus	Joskus	Harvoin	Usein	Ei koskaan
35-44	Nainen	Ylempi korkeakoulututkinto	2	0	Osa-aikainen	Suomi	2014	Itä-Uusimaa (ja HUS)	Ei	Erikoissairaanhoidossa (esim. sairaalan neurologian poliklinikka)			MS-tauti hoitotasapainossa, arjen toimintakyky alentunut			1	1	2	1	2	3	En ollenkaan	En ollenkaan	Tyydyttävä	Kohtalainen	Ei	Ei	Kyllä	Ei	Kyllä	Ei	Kyllä	Kyllä	Ei	Ei koskaan	Joskus	Aina	Aina	Harvoin	Joskus	Aina	Joskus	Joskus	Harvoin	Ei koskaan	Harvoin	Ei koskaan	Harvoin	Ei koskaan
55-64	Nainen	Ylempi korkeakoulututkinto	2	0	Täysipäiväinen	Suomi	2020	Kainuu	Kyllä	Erikoissairaanhoidossa (esim. sairaalan neurologian poliklinikka)		MS-tauti hoitotasapainossa, ei juuri toimintakykyhaittaa				5	2	8	2	6	4	En ollenkaan	En ollenkaan	Hyvä	Hyvä	Kyllä, suurinpiirtein	Kyllä, varmasti	Kyllä	Ei	Kyllä	Kyllä	Ei	Ei	Ei	Ei koskaan	Ei koskaan	Ei koskaan	Ei koskaan	Joskus	Ei koskaan	Usein	Usein	Usein	Usein	Ei koskaan	Joskus	Ei koskaan	Usein	Ei koskaan
35-44	Mies	Ylempi korkeakoulututkinto	4	2	Eläkkeellä (ml. työkyvyttömyyseläke)	Suomi	2007	Varsinais-Suomi	Ei	Erikoissairaanhoidossa (esim. sairaalan neurologian poliklinikka)			MS-tauti hoitotasapainossa, arjen toimintakyky alentunut			5	0	3	0	3	1	En ollenkaan	En ollenkaan	Tyydyttävä	Hyvä	En osaa sanoa	En osaa sanoa	Kyllä	Kyllä	Ei	Kyllä	Ei	Kyllä	Kyllä	Ei koskaan	Ei koskaan	En osaa sanoa	Joskus	Aina	Joskus	Usein	Usein	Usein	Harvoin	Joskus	En osaa sanoa	Joskus	Usein	Harvoin
35-44	Nainen	Toinen aste (Lukio tai ammattikoulu)	2	1	Osa-aikainen	Suomi	2018	Lappi	Ei	Erikoissairaanhoidossa (esim. sairaalan neurologian poliklinikka)		MS-tauti hoitotasapainossa, ei juuri toimintakykyhaittaa				2	0	10	4	2	3	En ollenkaan	En ollenkaan	Hyvä	Hyvä	Kyllä, suurinpiirtein	Ei	Kyllä	Kyllä	Kyllä	Kyllä	Ei	En osaa sanoa	Ei	Usein	Ei koskaan	En osaa sanoa	Usein	Joskus	Aina	Joskus	Joskus	Usein	Ei koskaan	Harvoin	Joskus	Harvoin	En osaa sanoa	Joskus
35-44	Nainen	Alempi korkeakoulututkinto	2	1	Osa-aikainen	Suomi	2020	Kanta-Häme	Ei	Erikoissairaanhoidossa (esim. sairaalan neurologian poliklinikka)		MS-tauti hoitotasapainossa, ei juuri toimintakykyhaittaa				3	5	8	5	2	2	En ollenkaan	En ollenkaan	Tyydyttävä	Hyvä	En osaa sanoa	En osaa sanoa	Kyllä	Kyllä	Kyllä	Kyllä	Ei	Kyllä	Ei	Joskus	En osaa sanoa	En osaa sanoa	Joskus	Usein	Usein	Usein	Usein	Usein	Usein	Harvoin	Usein	Harvoin	En osaa sanoa	Ei koskaan
35-44	Nainen	Alempi korkeakoulututkinto	2	0	Työtön	Suomi	2019	Pirkanmaa	Ei	Erikoissairaanhoidossa (esim. sairaalan neurologian poliklinikka)		MS-tauti hoitotasapainossa, ei juuri toimintakykyhaittaa				1	0	0	0	1	0	En ollenkaan	En ollenkaan	Hyvä	Hyvä	En osaa sanoa	En osaa sanoa	En osaa sanoa	Kyllä	Kyllä	Kyllä	Ei	Kyllä	Ei	Ei koskaan	Ei koskaan	En osaa sanoa	Joskus	Usein	Ei koskaan	Aina	Usein	Usein	Usein	Ei koskaan	En osaa sanoa	Ei koskaan	En osaa sanoa	Ei koskaan
55-64	Nainen	Peruskoulu	2	0	Eläkkeellä (ml. työkyvyttömyyseläke)	Suomi	2020	Päijät-Häme	En osaa sanoa	Erikoissairaanhoidossa (esim. sairaalan neurologian poliklinikka)			MS-tauti hoitotasapainossa, arjen toimintakyky alentunut	MS-tauti ei hoitotasapainossa (esim. pahenemisvaihe)		2	0	2	0	2	1	En ollenkaan	En ollenkaan	Huono	Kohtalainen	Ei	Ei	Kyllä	Ei	Kyllä	Ei	Kyllä	Kyllä	Ei	Joskus	Ei koskaan	En osaa sanoa	Usein	Joskus	Ei koskaan	Joskus	Joskus	Joskus	Harvoin	Ei koskaan	Ei koskaan	Ei koskaan	Ei koskaan	Ei koskaan
65-74	Nainen	Opistoasteen tutkinto	2	0	Eläkkeellä (ml. työkyvyttömyyseläke)	Suomi	2000	Pirkanmaa	Kyllä	En osaa sanoa		MS-tauti hoitotasapainossa, ei juuri toimintakykyhaittaa				0	0	4	2	0	6	En ollenkaan	En ollenkaan	Tyydyttävä	Kohtalainen	Kyllä, suurinpiirtein	Kyllä, suurinpiirtein	Kyllä	Kyllä	Ei	Ei	Ei	Kyllä	Ei	Ei koskaan	Ei koskaan	En osaa sanoa	En osaa sanoa	Joskus	Joskus	Usein	Harvoin	Joskus	Joskus	Joskus	En osaa sanoa	Joskus	Joskus	Joskus
45-54	Nainen	Ylempi korkeakoulututkinto	3	0	Osa-aikainen	Suomi	1992	Pohjois-Karjala	Ei	Erikoissairaanhoidossa (esim. sairaalan neurologian poliklinikka)			MS-tauti hoitotasapainossa, arjen toimintakyky alentunut			2	0	3	0	3	3	En ollenkaan	En ollenkaan	Tyydyttävä	Tyydyttävä	Ei	Kyllä, suurinpiirtein	Kyllä	Ei	Kyllä	Kyllä	Ei	Ei	Kyllä	Ei koskaan	Ei koskaan	En osaa sanoa	Usein	Joskus	Joskus	Usein	Aina	Aina	Aina	Ei koskaan	Aina	Aina	Joskus	Ei koskaan
45-54	Nainen	Ylempi korkeakoulututkinto	1 (Asun yksin)	0	Osa-aikainen	Suomi	2012	Kainuu	Ei	Erikoissairaanhoidossa (esim. sairaalan neurologian poliklinikka)		MS-tauti hoitotasapainossa, ei juuri toimintakykyhaittaa				6	1	0	0	2	0	En ollenkaan	Alle 7 päivää	Hyvä	Erinomainen	Kyllä, varmasti	Kyllä, varmasti	Kyllä	Kyllä	Kyllä	Kyllä	Ei	Kyllä	Kyllä	Ei koskaan	Ei koskaan	Ei koskaan	Harvoin	Usein	Usein	Usein	Aina	Aina	Aina	Usein	Aina	Usein	Usein	Harvoin
35-44	Nainen	Ylempi korkeakoulututkinto	3	1	Täysipäiväinen	Suomi	2018	Helsinki (ja HUS)	Ei	Erikoissairaanhoidossa (esim. sairaalan neurologian poliklinikka)		MS-tauti hoitotasapainossa, ei juuri toimintakykyhaittaa				4	3	2	0	4	6	Alle 7 päivää	En ollenkaan	Hyvä	Erinomainen	Kyllä, suurinpiirtein	Ei	Kyllä	Ei	Kyllä	Kyllä	Ei	Kyllä	Ei	Ei koskaan	Ei koskaan	En osaa sanoa	Usein	Usein	Joskus	Usein	Usein	Usein	Usein	Ei koskaan	En osaa sanoa	En osaa sanoa	En osaa sanoa	En osaa sanoa
35-44	Nainen	Alempi korkeakoulututkinto	3	2	Osa-aikainen	Ruotsi	2017	Pirkanmaa	Kyllä	Erikoissairaanhoidossa (esim. sairaalan neurologian poliklinikka)			MS-tauti hoitotasapainossa, arjen toimintakyky alentunut			1	0	8	0	5	12	En ollenkaan	En ollenkaan	Kohtalainen	Huono	Ei	Ei	Ei	Ei	Ei	Ei	Kyllä	Kyllä	Ei	Joskus	Ei koskaan	En osaa sanoa	Aina	Harvoin	Harvoin	Joskus	Joskus	Harvoin	Harvoin	Ei koskaan	Joskus	Ei koskaan	Harvoin	Ei koskaan
45-54	Nainen	Toinen aste (Lukio tai ammattikoulu)	3	0	Täysipäiväinen	Suomi	2006	Varsinais-Suomi	Ei	Erikoissairaanhoidossa (esim. sairaalan neurologian poliklinikka)		MS-tauti hoitotasapainossa, ei juuri toimintakykyhaittaa				1	0	1	0	4	2	En ollenkaan	En ollenkaan	Erinomainen	Tyydyttävä	Ei	Kyllä, varmasti	Kyllä	Kyllä	Ei	En osaa sanoa	Ei	Ei	Ei	Joskus	Ei koskaan	En osaa sanoa	Aina	Harvoin	Harvoin	Usein	Usein	Usein	Usein	Ei koskaan	Joskus	Ei koskaan	En osaa sanoa	Ei koskaan
25-34	Nainen	Alempi korkeakoulututkinto	1 (Asun yksin)	0	Täysipäiväinen	Suomi	2010	Kainuu	Ei	Erikoissairaanhoidossa (esim. sairaalan neurologian poliklinikka)		MS-tauti hoitotasapainossa, ei juuri toimintakykyhaittaa				2	0	4	1	1	4	En ollenkaan	En ollenkaan	Hyvä	Hyvä	En osaa sanoa	Kyllä, varmasti	En osaa sanoa	Kyllä	Kyllä	Kyllä	Ei	Kyllä	Ei	Ei koskaan	En osaa sanoa	En osaa sanoa	Ei koskaan	Usein	Joskus	Aina	Aina	Aina	Aina	Ei koskaan	Aina	Joskus	En osaa sanoa	Ei koskaan
45-54	Nainen	Ylempi korkeakoulututkinto	4	1	Osa-aikainen	Suomi	2014	Varsinais-Suomi	Ei	Erikoissairaanhoidossa (esim. sairaalan neurologian poliklinikka)			MS-tauti hoitotasapainossa, arjen toimintakyky alentunut			1	1	1	0	2	1	En ollenkaan	En ollenkaan	Tyydyttävä	Tyydyttävä	Ei	Kyllä, varmasti	Kyllä	Ei	Kyllä	Kyllä	Kyllä	Kyllä	Ei	Joskus	Ei koskaan	Ei koskaan	Usein	Joskus	Usein	Joskus	Joskus	Joskus	Usein	Harvoin	Joskus	Harvoin	Usein	Ei koskaan
55-64	Nainen	Opistoasteen tutkinto	2	0	Täysipäiväinen	Suomi	2000	Helsinki (ja HUS)	En osaa sanoa	Yksityisellä poliklinikalla (esim. yksityinen neurologi)			MS-tauti hoitotasapainossa, arjen toimintakyky alentunut			1	0	5	2	1	2	En ollenkaan	En ollenkaan	Kohtalainen	Tyydyttävä	Kyllä, suurinpiirtein	Kyllä, suurinpiirtein	En osaa sanoa	Ei	Ei	Kyllä	Ei	Kyllä	Ei	Ei koskaan	Ei koskaan	En osaa sanoa	Ei koskaan	Aina	Joskus	Usein	Aina	Aina	Aina	Joskus	Aina	Joskus	Usein	Harvoin
55-64	Nainen	Toinen aste (Lukio tai ammattikoulu)	1 (Asun yksin)	0	Eläkkeellä (ml. työkyvyttömyyseläke)	Suomi	1991	Kanta-Häme	Kyllä	Erikoissairaanhoidossa (esim. sairaalan neurologian poliklinikka)		MS-tauti hoitotasapainossa, ei juuri toimintakykyhaittaa				9	0	5	0	6	3	En ollenkaan	En ollenkaan	Hyvä	Erinomainen	En osaa sanoa	Kyllä, suurinpiirtein	Kyllä	Ei	En osaa sanoa	Kyllä	Ei	Ei	Ei	Harvoin	Ei koskaan	Ei koskaan	Ei koskaan	Aina	Usein	Aina	Aina	Aina	Aina	Joskus	Aina	Usein	Aina	En osaa sanoa
25-34	Nainen	Toinen aste (Lukio tai ammattikoulu)	2	0	Täysipäiväinen	Suomi	2019	Pirkanmaa	Ei	Erikoissairaanhoidossa (esim. sairaalan neurologian poliklinikka)		MS-tauti hoitotasapainossa, ei juuri toimintakykyhaittaa				2	0	5	1	2	6	En ollenkaan	En ollenkaan	Hyvä	Hyvä	En osaa sanoa	Ei	Kyllä	Kyllä	Kyllä	Kyllä	Ei	Ei	Ei	Ei koskaan	En osaa sanoa	En osaa sanoa	Ei koskaan	Aina	Joskus	Usein	Usein	Usein	En osaa sanoa	Aina	Usein	Usein	Aina	En osaa sanoa
45-54	Nainen	Ylempi korkeakoulututkinto	2	0	Eläkkeellä (ml. työkyvyttömyyseläke)	Suomi	1998	Keski-Suomi	Ei	Erikoissairaanhoidossa (esim. sairaalan neurologian poliklinikka)			MS-tauti hoitotasapainossa, arjen toimintakyky alentunut			1	0	6	3	2	3	En ollenkaan	En ollenkaan	Hyvä	Hyvä	Kyllä, suurinpiirtein	Kyllä, varmasti	Kyllä	Kyllä	Kyllä	Kyllä	Ei	Ei	Kyllä	Ei koskaan	Ei koskaan	En osaa sanoa	Joskus	Joskus	Usein	Joskus	Usein	Usein	Usein	Joskus	Joskus	Joskus	Usein	Harvoin
55-64	Nainen	Opistoasteen tutkinto	1 (Asun yksin)	0	Eläkkeellä (ml. työkyvyttömyyseläke)	Suomi	2002	Keski-Pohjanmaa	Kyllä	En osaa sanoa				MS-tauti ei hoitotasapainossa (esim. pahenemisvaihe)		0	0	1	0	0	1	En ollenkaan	En ollenkaan	En osaa sanoa	Huono	En osaa sanoa	En osaa sanoa	Ei	Ei	Ei	Ei	Kyllä	Kyllä	Ei	En osaa sanoa	En osaa sanoa	En osaa sanoa	En osaa sanoa	En osaa sanoa	En osaa sanoa	En osaa sanoa	En osaa sanoa	En osaa sanoa	En osaa sanoa	En osaa sanoa	En osaa sanoa	En osaa sanoa	En osaa sanoa	En osaa sanoa
55-64	Nainen	Alempi korkeakoulututkinto	2	0	Osa-aikainen	Suomi	2018	Varsinais-Suomi	Kyllä	Erikoissairaanhoidossa (esim. sairaalan neurologian poliklinikka)			MS-tauti hoitotasapainossa, arjen toimintakyky alentunut			40	5	5	5	40	5	En ollenkaan	En ollenkaan	Huono	Kohtalainen	Ei	Ei	Kyllä	Ei	Ei	Kyllä	Kyllä	Kyllä	Ei	Harvoin	Ei koskaan	En osaa sanoa	Usein	Usein	Harvoin	Joskus	Usein	Usein	Usein	Ei koskaan	Harvoin	Harvoin	Joskus	Ei koskaan
35-44	Nainen	Opistoasteen tutkinto	5 tai enemmän	4 tai enemmän	Täysipäiväinen	Suomi	2012	Kanta-Häme	Kyllä	Erikoissairaanhoidossa (esim. sairaalan neurologian poliklinikka)		MS-tauti hoitotasapainossa, ei juuri toimintakykyhaittaa				2	1	3	2	2	2	En ollenkaan	En ollenkaan	Hyvä	Erinomainen	Kyllä, suurinpiirtein	Kyllä, suurinpiirtein	Kyllä	Kyllä	Kyllä	Kyllä	Ei	Kyllä	Ei	Harvoin	Ei koskaan	Ei koskaan	Usein	Aina	Aina	Aina	Aina	Aina	Aina	Usein	Usein	Aina	Usein	Usein
45-54	Nainen	Alempi korkeakoulututkinto	2	0	Osa-aikainen	Suomi	2002	Varsinais-Suomi	Ei	Erikoissairaanhoidossa (esim. sairaalan neurologian poliklinikka)			MS-tauti hoitotasapainossa, arjen toimintakyky alentunut			55	0	2	0	3	2	En ollenkaan	Yli 7 päivää	Hyvä	Hyvä	Kyllä, suurinpiirtein	Kyllä, varmasti	Kyllä	Kyllä	Kyllä	Kyllä	Ei	Ei	En osaa sanoa	Ei koskaan	En osaa sanoa	En osaa sanoa	Harvoin	Usein	Aina	Usein	Usein	Usein	Aina	Harvoin	Aina	Usein	Usein	Harvoin
65-74	Nainen	Toinen aste (Lukio tai ammattikoulu)	1 (Asun yksin)	0	Eläkkeellä (ml. työkyvyttömyyseläke)	Suomi	2003	Keski-Suomi	Kyllä	Perusterveydenhuollossa (esim. terveyskeskus tai - asema)			MS-tauti hoitotasapainossa, arjen toimintakyky alentunut			2	0	20	0	2	4	En ollenkaan	Yli 7 päivää	Kohtalainen	Kohtalainen	Ei	Ei	Kyllä	Ei	Ei	Ei	Ei	Kyllä	Ei	Aina	Ei koskaan	En osaa sanoa	En osaa sanoa	Aina	Harvoin	Usein	Aina	Aina	Aina	En osaa sanoa	En osaa sanoa	Joskus	En osaa sanoa	Joskus
35-44	Nainen	Alempi korkeakoulututkinto	2	0	Työtön	Suomi	2019	Pirkanmaa	Kyllä	Erikoissairaanhoidossa (esim. sairaalan neurologian poliklinikka)			MS-tauti hoitotasapainossa, arjen toimintakyky alentunut			1	2	6	1	3	8	En ollenkaan	En ollenkaan	Kohtalainen	Kohtalainen	Ei	Kyllä, suurinpiirtein	Kyllä	Ei	Ei	Kyllä	Kyllä	Kyllä	Ei	Ei koskaan	Ei koskaan	En osaa sanoa	Aina	Joskus	Aina	Joskus	Harvoin	Harvoin	Joskus	Ei koskaan	Ei koskaan	Harvoin	Harvoin	Ei koskaan
55-64	Nainen	Toinen aste (Lukio tai ammattikoulu)	2	0	Eläkkeellä (ml. työkyvyttömyyseläke)	Suomi	2002	Etelä-Pohjanmaa	Kyllä	Erikoissairaanhoidossa (esim. sairaalan neurologian poliklinikka)			MS-tauti hoitotasapainossa, arjen toimintakyky alentunut			120	0	10	5	5	6	En ollenkaan	En ollenkaan	Huono	Tyydyttävä	Ei	Ei	Kyllä	Ei	Kyllä	Kyllä	Ei	Kyllä	Ei	Harvoin	Ei koskaan	En osaa sanoa	Joskus	Usein	Usein	Usein	Aina	Usein	Usein	Joskus	Joskus	Harvoin	Usein	Harvoin
55-64	Nainen	Tutkijakoulutus	2	0	Eläkkeellä (ml. työkyvyttömyyseläke)	Suomi	1995	Helsinki (ja HUS)	Ei	Erikoissairaanhoidossa (esim. sairaalan neurologian poliklinikka)				MS-tauti ei hoitotasapainossa (esim. pahenemisvaihe)		71	0	1	0	5	1	En ollenkaan	Alle 7 päivää	Kohtalainen	Erinomainen	Kyllä, suurinpiirtein	Kyllä, suurinpiirtein	Kyllä	Ei	Kyllä	Kyllä	Ei	Kyllä	Kyllä	Ei koskaan	Ei koskaan	Ei koskaan	Usein	Usein	Joskus	Usein	Usein	Usein	Joskus	Harvoin	Usein	Usein	Usein	Ei koskaan
65-74	Mies	Peruskoulu	2	0	Eläkkeellä (ml. työkyvyttömyyseläke)	Suomi	2018	Pirkanmaa	En osaa sanoa	Erikoissairaanhoidossa (esim. sairaalan neurologian poliklinikka)			MS-tauti hoitotasapainossa, arjen toimintakyky alentunut			2	2	2	2	3	2	En ollenkaan	En ollenkaan	Kohtalainen	Tyydyttävä	Ei	En osaa sanoa	Kyllä	Ei	Kyllä	Ei	Ei	Kyllä	Kyllä	Harvoin	Ei koskaan	En osaa sanoa	Joskus	Usein	Usein	Usein	Usein	Usein	Usein	Ei koskaan	Harvoin	Usein	Joskus	Usein
45-54	Nainen	Alempi korkeakoulututkinto	2	0	Eläkkeellä (ml. työkyvyttömyyseläke)	Suomi	2002	Etelä-Karjala	Ei	Erikoissairaanhoidossa (esim. sairaalan neurologian poliklinikka)			MS-tauti hoitotasapainossa, arjen toimintakyky alentunut			1	0	2	0	1	2	En ollenkaan	En ollenkaan	Tyydyttävä	Hyvä	En osaa sanoa	En osaa sanoa	Kyllä	Kyllä	Kyllä	Kyllä	Ei	Kyllä	Ei	Ei koskaan	Ei koskaan	En osaa sanoa	En osaa sanoa	Aina	Usein	Aina	Aina	Aina	Aina	Usein	En osaa sanoa	En osaa sanoa	En osaa sanoa	Usein
65-74	Nainen	Peruskoulu	1 (Asun yksin)	0	Eläkkeellä (ml. työkyvyttömyyseläke)	Suomi	1994	Pohjois-Savo	Ei	Perusterveydenhuollossa (esim. terveyskeskus tai - asema)		MS-tauti hoitotasapainossa, ei juuri toimintakykyhaittaa				0	0	0	0	0	2	En ollenkaan	Alle 7 päivää	Hyvä	Erinomainen	Ei	Kyllä, varmasti	Kyllä	Kyllä	Kyllä	Kyllä	Ei	Ei	Ei	Ei koskaan	Ei koskaan	Ei koskaan	Harvoin	Usein	Usein	Aina	Aina	Aina	Usein	Aina	Aina	Aina	Usein	Usein
45-54	Nainen	Toinen aste (Lukio tai ammattikoulu)	2	0	Eläkkeellä (ml. työkyvyttömyyseläke)	Suomi	2013	Helsinki (ja HUS)	Ei	Yksityisellä poliklinikalla (esim. yksityinen neurologi)			MS-tauti hoitotasapainossa, arjen toimintakyky alentunut			4	0	4	0	3	2	En ollenkaan	Alle 7 päivää	Hyvä	Erinomainen	Kyllä, varmasti	Kyllä, varmasti	Kyllä	Kyllä	Kyllä	Kyllä	Ei	Ei	Kyllä	Ei koskaan	Ei koskaan	En osaa sanoa	Ei koskaan	Aina	Aina	Aina	Aina	Aina	Aina	Aina	Aina	Aina	Aina	Joskus
35-44	Nainen	Toinen aste (Lukio tai ammattikoulu)	1 (Asun yksin)	0	Osa-aikainen	Suomi	2012	Varsinais-Suomi	Ei	Erikoissairaanhoidossa (esim. sairaalan neurologian poliklinikka)		MS-tauti hoitotasapainossa, ei juuri toimintakykyhaittaa				14	0	2	0	7	4	En ollenkaan	Yli 7 päivää	Hyvä	Erinomainen	Kyllä, varmasti	Kyllä, varmasti	Kyllä	Kyllä	Kyllä	Kyllä	Ei	Ei	Kyllä	Ei koskaan	Ei koskaan	En osaa sanoa	Harvoin	Aina	Aina	Aina	Aina	Aina	Aina	Usein	Aina	Aina	Usein	Ei koskaan
25-34	Nainen	Toinen aste (Lukio tai ammattikoulu)	2	0	Täysipäiväinen	Suomi	2011	Etelä-Pohjanmaa	Kyllä	Erikoissairaanhoidossa (esim. sairaalan neurologian poliklinikka)		MS-tauti hoitotasapainossa, ei juuri toimintakykyhaittaa				2	1	2	0	1	1	En ollenkaan	En ollenkaan	Erinomainen	Erinomainen	Kyllä, suurinpiirtein	Kyllä, varmasti	Kyllä	Kyllä	Kyllä	Kyllä	Ei	Ei	Kyllä	Ei koskaan	Ei koskaan	En osaa sanoa	Harvoin	Aina	Usein	Aina	Usein	Aina	Aina	Usein	Aina	Aina	Aina	Joskus
55-64	Nainen	Alempi korkeakoulututkinto	2	0	Täysipäiväinen	Suomi	2019	Helsinki (ja HUS)	Ei	Erikoissairaanhoidossa (esim. sairaalan neurologian poliklinikka)		MS-tauti hoitotasapainossa, ei juuri toimintakykyhaittaa				4	0	2	0	3	1	En ollenkaan	Alle 7 päivää	Kohtalainen	Tyydyttävä	Ei	Kyllä, suurinpiirtein	Kyllä	Kyllä	Kyllä	Kyllä	Kyllä	Kyllä	Ei	Harvoin	Ei koskaan	En osaa sanoa	Joskus	Joskus	Joskus	Joskus	Joskus	Joskus	Joskus	Ei koskaan	Joskus	Ei koskaan	Usein	Ei koskaan
65-74	Mies	Ylempi korkeakoulututkinto	2	0	Osa-aikainen	Ruotsi	1999	Helsinki (ja HUS)	Ei	Yksityisellä poliklinikalla (esim. yksityinen neurologi)			MS-tauti hoitotasapainossa, arjen toimintakyky alentunut			2	0	3	1	2	2	En ollenkaan	En ollenkaan	Kohtalainen	Hyvä	Kyllä, suurinpiirtein	Kyllä, varmasti	En osaa sanoa	Kyllä	Ei	Kyllä	Ei	Ei	Ei	Ei koskaan	En osaa sanoa	En osaa sanoa	Ei koskaan	Aina	Ei koskaan	Aina	Aina	Aina	Aina	Usein	Aina	Aina	Aina	Usein
45-54	Nainen	Toinen aste (Lukio tai ammattikoulu)	2	0	Eläkkeellä (ml. työkyvyttömyyseläke)	Suomi	2006	Pohjois-Pohjanmaa	Kyllä	Erikoissairaanhoidossa (esim. sairaalan neurologian poliklinikka)		MS-tauti hoitotasapainossa, ei juuri toimintakykyhaittaa	MS-tauti hoitotasapainossa, arjen toimintakyky alentunut			1	1	2	2	2	4	En ollenkaan	Alle 7 päivää	Tyydyttävä	Hyvä	Kyllä, suurinpiirtein	Kyllä, suurinpiirtein	Kyllä	Kyllä	Ei	Kyllä	Ei	Ei	Ei	Ei koskaan	Ei koskaan	En osaa sanoa	Joskus	Joskus	Joskus	Usein	Usein	Joskus	Usein	Joskus	Joskus	Harvoin	Joskus	Harvoin
55-64	Nainen	Opistoasteen tutkinto	3	0	Eläkkeellä (ml. työkyvyttömyyseläke)	Suomi	1995	Pirkanmaa	Kyllä	En osaa sanoa			MS-tauti hoitotasapainossa, arjen toimintakyky alentunut			0	0	5	1	0	3	En ollenkaan	En ollenkaan	Tyydyttävä	Huono	Ei	Ei	Ei	Ei	Ei	Ei	Ei	Kyllä	Ei	En osaa sanoa	En osaa sanoa	En osaa sanoa	Joskus	Joskus	Joskus	Usein	Usein	Joskus	Usein	Ei koskaan	Joskus	Harvoin	En osaa sanoa	Ei koskaan
[truncated: 645 more rows]
[truncated: 55 more columns]

## Sheet: PIVOT KAIKKI_muok
Riviotsikot
1
2
3
4
5
NA
(tyhjä)
Kaikki yhteensä

## Sheet: EN_translations
#	Fin	Eng	Abbreviation	Flipped values (negative questions)
1	Ikä	Age	-
2	Sukupuoli	Gender	-
3	Koulutusaste	Level of education	-
4	Ruokakunnan koko	Household size	-
5	Ruokakunnassa asuvien alaikäisten (alle 18 vuotiaiden) määrä	Number of minors (under 18) in the household	-
6	Työllisyystilanne	Employment status	-
[truncated: 99 more rows]
